# Supplementary material for: SPRY4 as a Potential Mediator of the Anti-Tumoral Role of Macrophages in Anaplastic Thyroid Cancer Cells
Source: MDPI journal article supplement (doi:10.3390/cancers15174387), 2023-09-01

## Western blot gels

### 1. Western blots for SPRY4 protein validation (Figure 8)

SPRY4

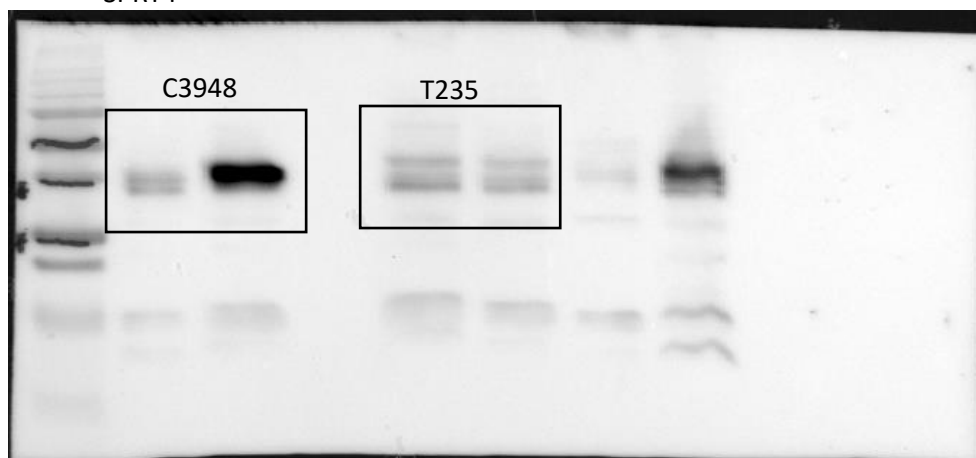

$\alpha$ -tubulin

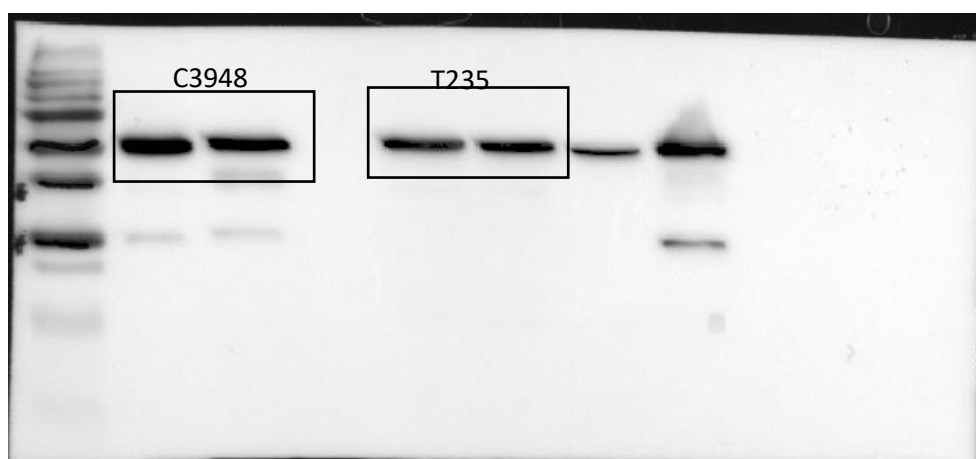

## 2. Western blots for SPRY4 silencing (Figure S9)

SPRY4 - T235

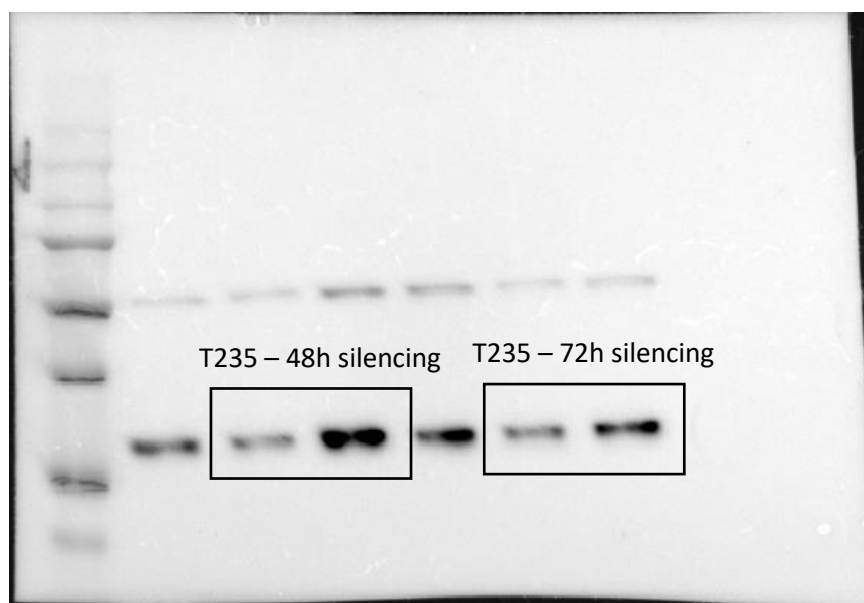

$\beta$ -actin - T235

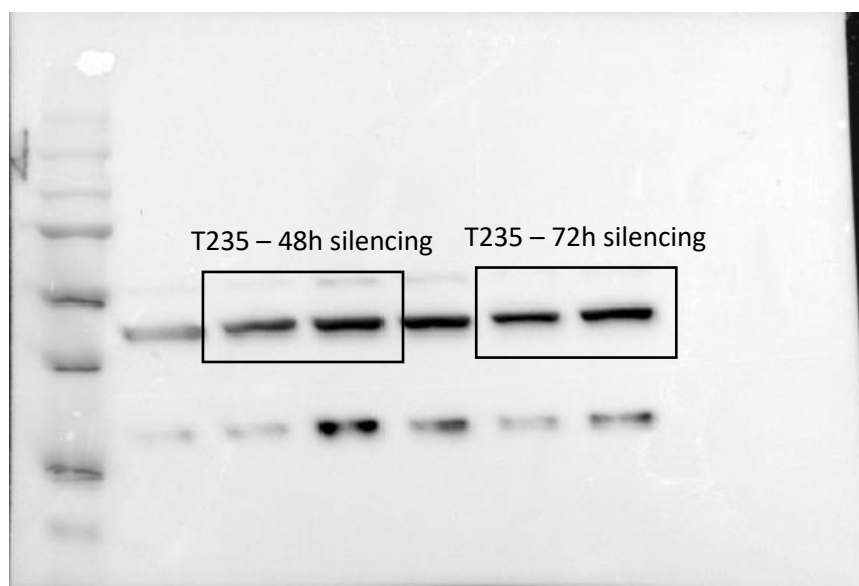

SPRY4 – C3948

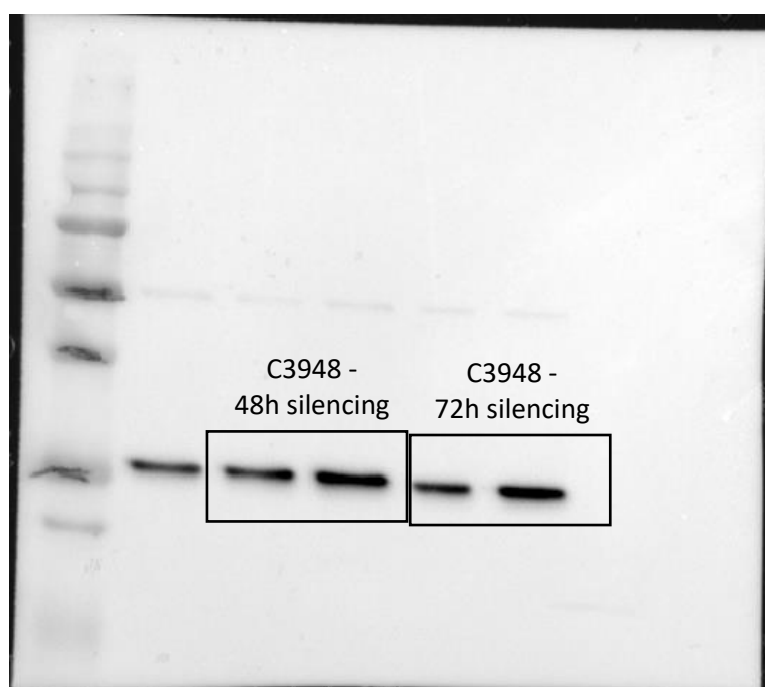

$\beta$ -actin – C3948

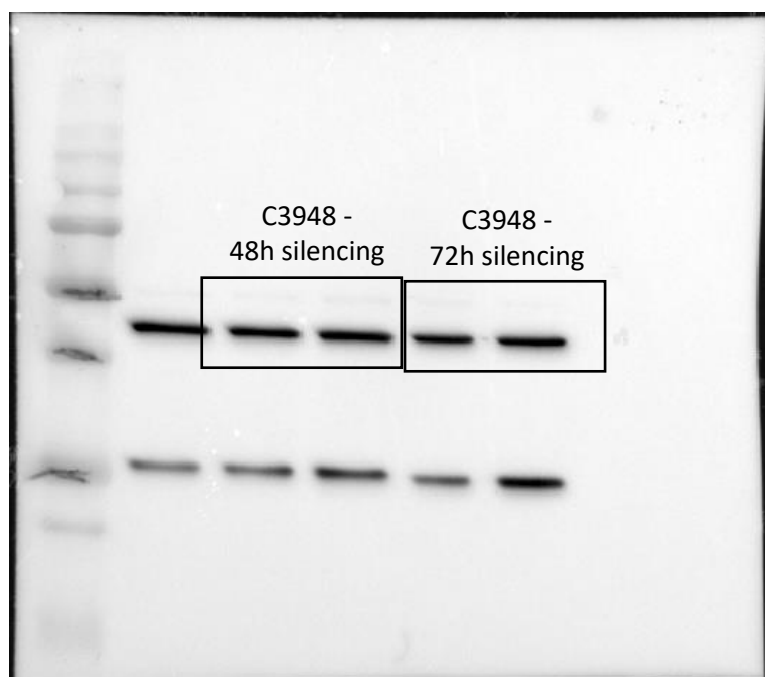

Supplement: s1 [file s1]
