# Supplementary material for: SPRY4 as a Potential Mediator of the Anti-Tumoral Role of Macrophages in Anaplastic Thyroid Cancer Cells
Source: Cancers (Basel). 2023 Sep 1;15(17):4387. doi: 10.3390/cancers15174387 (PMC10487195; doi:10.3390/cancers15174387)
Supplement: Supplementary file 1 [file cancers-15-04387-s001.zip › Suppementary Tables.xls]

## Sheet: Legend
SPRY4 as a Potential Mediator of the Anti-Tumoral Role of Macrophages in Anaplastic Thyroid Cancer Cells
Ana Teresa Pinto 1, 2,*,†, Marta Pojo 1,†, Ricardo Rodrigues 1,†, Diana Pacheco Sousa 1, Rune Matthiesen 3, Ana Sofia Carvalho 3, Hans C. Beck 4, Carolina Pires 1, Rodrigo Eduardo 1, Joana Simões Pereira 1,5,
Valeriano Leite 1,5,6 and Branca Maria Cavaco 1
†These authors contributed equally to this work
Table S1 - List of proteins identified in C3948 cells after co-culture with macrophages versus the respective monoculture. Biological replicates were performed in triplicate and each one was analyzed three times by mass spectrometry. C, C3948; Co, co-culture; Mo, monoculture.
Table S2 - List of proteins identified in T235 cells in co-culture with macrophages versus the respective monoculture. Biological replicates were performed in triplicate and each one was analyzed three times by mass spectrometry. T, T235; Co, co-culture; Mo, monoculture.

## Sheet: Table S1
Protein	C.Co_1_1	C.Co_1_2	C.Co_1_3	C.Co_2_1	C.Co_2_2	C.Co_2_3	C.Co_3_1	C.Co_3_2	C.Co_3_3	C.Mo_1_1	C.Mo_1_2	C.Mo_1_3	C.Mo_2_1	C.Mo_2_2	C.Mo_2_3	C.Mo_3_1	C.Mo_3_2	C.Mo_3_3	mean_C.Co	mean_C.Mo	Nb canonical tryptic peptides	Gene name	proteins	logFC	AveExpr	t	P.Value	adj.P.Val	B	X..rep.C.Co	X..rep.C.Mo	cytoplasm	membrane	nucleus
>tr|Q5VX85|Q5VX85_HUMAN Poly [ADP-ribose] polymerase 1 OS=Homo sapiens GN=PARP1 PE=1 SV=1	12.6955218954773	12.6955218954773	12.6955218954773	12.6955218954773	12.6955218954773	12.6955218954773	12.6955218954773	14.5164118145023	12.6955218954773	17.0137464922883	16.279277268387	16.7595158225044	16.5566728778144	15.240820368531	15.8080915731198	16.7404914177895	16.0404699906192	15.5617928277095	12.89784	16.22232	8	PARP1	>tr|Q5VX85|Q5VX85_HUMAN Poly [ADP-ribose] polymerase 1 OS=Homo sapiens GN=PARP1 PE=1 SV=1	-3.32448	14.5600814231713	11.6243781111437	1.23350945079961e-09	5.9923889119845e-06	10.8395712472088	9	9	-	+	+
>tr|D6RB56|D6RB56_HUMAN Protein sprouty homolog 4 (Fragment) OS=Homo sapiens GN=SPRY4 PE=1 SV=1	20.0993374129073	20.9288588400488	20.8914516645416	22.2468575936323	22.4502257219054	22.1493405033729	21.7800639101519	21.4846377175509	21.3263216851586	12.6955218954773	12.6955218954773	17.636084974484	12.7215862908649	12.6955218954773	12.6955218954773	18.3706976403373	12.6955218954773	12.6955218954773	21.48412	13.87794	2	SPRY4	>tr|D6RB56|D6RB56_HUMAN Protein sprouty homolog 4 (Fragment) OS=Homo sapiens GN=SPRY4 PE=1 SV=1	7.60618	17.6810330737678	-9.5964285131578	2.26352706189754e-08	5.49810723334913e-05	8.65578776313982	9	9	+	-	-
>sp|P17301|ITA2_HUMAN Integrin alpha-2 OS=Homo sapiens GN=ITGA2 PE=1 SV=1	21.2950894911578	21.3288198787194	21.3946201900516	21.6724442306905	21.8306016851521	21.8049841443456	20.2615830894234	20.8469493046454	20.9992223164872	19.538061632916	19.8520472405941	19.9148278117395	19.473106890975	19.6706504335023	19.980697392791	20.5775863384653	19.9362358481444	19.8106181329661	21.27048	19.86154	51	ITGA2	>sp|P17301|ITA2_HUMAN Integrin alpha-2 OS=Homo sapiens GN=ITGA2 PE=1 SV=1	1.40894	20.5660081140426	-6.72322216791369	3.14719034868623e-06	0.005085646561357	4.55855112393445	9	9	-	-	+
>sp|Q9UQ03|COR2B_HUMAN Coronin-2B OS=Homo sapiens GN=CORO2B PE=1 SV=4	15.0112949412376	14.0623257583452	13.7734163463962	14.0264984831901	13.9574294280361	14.1304278702192	15.0347199078895	14.6213150291619	14.4287348974587	12.9162312991536	13.1573894583545	12.6955218954773	12.7215862908649	12.6955218954773	12.6955218954773	13.7136088423157	13.3575709224718	13.0462298200826	14.33846	12.99991	21	CORO2B	>sp|Q9UQ03|COR2B_HUMAN Coronin-2B OS=Homo sapiens GN=CORO2B PE=1 SV=4	1.33855	13.6691858323116	-6.52887562346065	4.57003963041165e-06	0.005085646561357	4.23307204190412	9	9	+	+	-
>tr|H3BM93|H3BM93_HUMAN Nuclear pore complex protein Nup93 (Fragment) OS=Homo sapiens GN=NUP93 PE=1 SV=1	17.0236770181605	17.0255321032743	17.2467827637823	17.5162488779348	17.3678406829308	17.4514040564685	17.4318978660534	17.6009632994788	17.0434618620198	13.4736551570547	14.5401405668949	13.9140962189898	15.5584029763831	14.6389857842656	12.6955218954773	14.1598419616343	16.0292538063815	16.600372090788	17.30087	14.62336	11	NUP93	>tr|H3BM93|H3BM93_HUMAN Nuclear pore complex protein Nup93 (Fragment) OS=Homo sapiens GN=NUP93 PE=1 SV=1	2.6775	15.9621154993318	-6.4549560246286	5.27375783540038e-06	0.005085646561357	4.10762841380133	9	9	-	+	-
>tr|M0R0X3|M0R0X3_HUMAN Protein Smaug homolog 2 OS=Homo sapiens GN=SAMD4B PE=1 SV=1	14.6997363192267	14.4628797589111	13.8619241294776	13.7824573744489	14.1267807885754	14.281392682786	15.737516843831	14.4900325716801	13.4266988590017	16.0264505475944	15.9435116843068	14.9342544613031	17.6689697885473	16.4563913194076	16.5057138166509	16.8439061706826	16.8122879064782	17.0449860586641	14.31882	16.47072	14	SAMD4B	>tr|M0R0X3|M0R0X3_HUMAN Protein Smaug homolog 2 OS=Homo sapiens GN=SAMD4B PE=1 SV=1	-2.15189	15.3947717267541	6.36524459734636	6.28116084152779e-06	0.005085646561357	3.95417172926316	9	9	+	-	+
>tr|F5H1U3|F5H1U3_HUMAN Peptidyl-prolyl cis-trans isomerase (Fragment) OS=Homo sapiens GN=FKBP4 PE=1 SV=1	17.5697103095182	18.3968615176074	18.17293495252	18.2965497599361	18.1378394441991	18.335421384942	18.46597224533	18.6513167139562	18.0188805331806	19.3877308724144	19.4527848892393	19.7708726629802	18.8432725549029	20.0141862513421	19.8814257960974	18.8805090980788	19.0020143125224	19.5718814226356	18.22728	19.42274	5	FKBP4	>tr|F5H1U3|F5H1U3_HUMAN Peptidyl-prolyl cis-trans isomerase (Fragment) OS=Homo sapiens GN=FKBP4 PE=1 SV=1	-1.19547	18.825009151189	6.27766129425468	7.45784468550731e-06	0.00517574421174207	3.80307722350011	9	9	+	-	+
>sp|Q15139|KPCD1_HUMAN Serine/threonine-protein kinase D1 OS=Homo sapiens GN=PRKD1 PE=1 SV=2	15.7484377384378	15.3949179671786	14.2178226520793	15.7040515970887	15.9875767148115	16.027912472646	15.3560652738888	14.7330510384196	14.7446225119031	15.4167000536001	13.344749081916	13.1223814897894	12.7215862908649	12.6955218954773	12.6955218954773	12.6955218954773	12.6955218954773	12.6955218954773	15.32383	13.12034	35	PRKD1	>sp|Q15139|KPCD1_HUMAN Serine/threonine-protein kinase D1 OS=Homo sapiens GN=PRKD1 PE=1 SV=2	2.20349	14.222082464445	-6.13213089289869	9.94291011394758e-06	0.0055783373032202	3.54924364013404	9	9	+	-	+
>sp|O94806|KPCD3_HUMAN Serine/threonine-protein kinase D3 OS=Homo sapiens GN=PRKD3 PE=1 SV=1	15.7019095471911	15.3491232292212	14.1714445659403	15.6683605612771	15.9531976337568	15.9896398127824	15.307147962274	14.6895656177941	14.7055472963459	15.3733122083735	13.3065473156342	13.0739557147486	12.7215862908649	12.6955218954773	12.6955218954773	12.6955218954773	12.6955218954773	12.6955218954773	15.28177	13.10589	36	PRKD3	>sp|O94806|KPCD3_HUMAN Serine/threonine-protein kinase D3 OS=Homo sapiens GN=PRKD3 PE=1 SV=1	2.17588	14.1938304018661	-6.11269175363014	1.03345071488229e-05	0.0055783373032202	3.51507780083871	9	9	+	+	+
>sp|Q16739|CEGT_HUMAN Ceramide glucosyltransferase OS=Homo sapiens GN=UGCG PE=1 SV=1	16.12586403076	15.4222844705153	14.4965993923029	14.5718959147004	14.3318081217565	14.5281168170735	14.7621166504824	15.0249969604141	14.1993059033622	15.9217596912955	16.7316038371091	15.7635886579466	18.0708795028503	18.0734976762011	18.0767751132779	16.5101357662047	16.6373064227976	16.8813320613443	14.82922	16.96299	19	UGCG	>sp|Q16739|CEGT_HUMAN Ceramide glucosyltransferase OS=Homo sapiens GN=UGCG PE=1 SV=1	-2.13377	15.8961037216886	5.93140342710028	1.48520594920352e-05	0.00683337820008511	3.19353122464945	9	9	-	+	-
>sp|P51149|RAB7A_HUMAN Ras-related protein Rab-7a OS=Homo sapiens GN=RAB7A PE=1 SV=1	24.3465669547149	24.0312542925386	23.0515611645781	24.0123449975301	24.5082260759666	24.2404019387013	24.7660942889123	24.5052521671405	24.7055897701946	21.9672466360593	21.9109472051311	22.6478761769809	21.6334502682187	22.7015200352301	22.4142478950508	21.5703375082404	21.5887108904933	24.2307781118304	24.24081	22.29612	13	RAB7A	>sp|P51149|RAB7A_HUMAN Ras-related protein Rab-7a OS=Homo sapiens GN=RAB7A PE=1 SV=1	1.94469	23.2684670209729	-5.91106723126223	1.54728613011396e-05	0.00683337820008511	3.15713550290421	9	9	-	-	-
>tr|E5RJP4|E5RJP4_HUMAN Glutamine--fructose-6-phosphate aminotransferase [isomerizing] 2 (Fragment) OS=Homo sapiens GN=GFPT2 PE=1 SV=1	20.8272360951478	20.7467382887622	21.1099955468472	19.5333929457409	19.7399163554917	19.5626563244273	21.1453695142682	20.9635787417899	20.8760651667331	18.7839327004856	18.4850448391592	19.1918352032844	18.9026622788089	18.3781812028021	18.5612138595217	19.0410353327464	19.3766377955003	19.6594490546375	20.50055	18.93111	13	GFPT2	>tr|E5RJP4|E5RJP4_HUMAN Glutamine--fructose-6-phosphate aminotransferase [isomerizing] 2 (Fragment) OS=Homo sapiens GN=GFPT2 PE=1 SV=1	1.56944	19.7158300692308	-5.80080955328432	1.93372670519894e-05	0.00741983610872231	2.95867865619469	9	9	-	-	-
>sp|Q8N5C6|SRBD1_HUMAN S1 RNA-binding domain-containing protein 1 OS=Homo sapiens GN=SRBD1 PE=1 SV=2	12.6955218954773	11.7169968918866	12.2405109694249	12.6955218954773	12.6955218954773	12.6955218954773	13.2386620241107	13.1855438075841	12.6955218954773	14.7548492643341	13.5113158746429	13.038495144516	15.307147962274	15.2683786285775	16.1113889847228	14.8966161558141	14.4663103868174	14.4016055663977	12.65104	14.63957	50	SRBD1	>sp|Q8N5C6|SRBD1_HUMAN S1 RNA-binding domain-containing protein 1 OS=Homo sapiens GN=SRBD1 PE=1 SV=2	-1.98853	13.6453017299161	5.78778211624434	1.98554692081906e-05	0.00741983610872231	2.93510513963863	9	9	-	-	-
>sp|Q9NY12|GAR1_HUMAN H/ACA ribonucleoprotein complex subunit 1 OS=Homo sapiens GN=GAR1 PE=1 SV=1	19.0356120637326	18.7600763843516	18.8491701830578	17.5981553130769	18.1469192275214	17.8261787134341	18.3501172266672	18.0480216425469	18.5616624394008	15.6116874078303	17.6438584224109	16.8757755684867	15.93967761656	17.3578984842034	17.2486789372657	16.3850316650142	16.9596006079465	16.9190209177135	18.35288	16.77125	9	GAR1	>sp|Q9NY12|GAR1_HUMAN H/ACA ribonucleoprotein complex subunit 1 OS=Homo sapiens GN=GAR1 PE=1 SV=1	1.58163	17.5620634900678	-5.69187897033927	2.41388876621429e-05	0.00837619401876358	2.7607628361716	9	9	-	-	+
>tr|E9PPZ7|E9PPZ7_HUMAN FACT complex subunit SSRP1 (Fragment) OS=Homo sapiens GN=SSRP1 PE=1 SV=1	12.6955218954773	13.2968168626272	12.6955218954773	12.6955218954773	12.6955218954773	12.6955218954773	12.6955218954773	12.6955218954773	14.0506381906218	15.5602572022965	15.9706363700369	12.6955218954773	16.6365860773923	15.5237346876772	15.8331094590765	14.7454394082706	14.7086711715332	14.7997597898643	12.9129	15.16375	8	SSRP1	>tr|E9PPZ7|E9PPZ7_HUMAN FACT complex subunit SSRP1 (Fragment) OS=Homo sapiens GN=SSRP1 PE=1 SV=1	-2.25085	14.0383235768453	5.63742668899495	2.69842518084067e-05	0.00873929968568266	2.66115118330225	9	9	+	-	+
>sp|P51572|BAP31_HUMAN B-cell receptor-associated protein 31 OS=Homo sapiens GN=BCAP31 PE=1 SV=3	23.6396728031897	23.9485633390276	23.4042401673838	23.7521664475374	23.9320496252397	23.4890763131079	23.2876723412922	23.1551091836991	23.1046791637092	23.0327335820872	22.5189108094716	22.7512735083187	22.0621108049691	22.5151848239609	22.0636278306167	22.1568608956562	22.9027528399249	22.8479844836537	23.52369	22.53905	13	BCAP31	>sp|P51572|BAP31_HUMAN B-cell receptor-associated protein 31 OS=Homo sapiens GN=BCAP31 PE=1 SV=3	0.984643	23.0313704979359	-5.54267998708962	3.27865102234017e-05	0.00968836904196555	2.48676970837552	9	9	-	+	-
>tr|H3BPK7|H3BPK7_HUMAN Alanine--tRNA ligase, cytoplasmic (Fragment) OS=Homo sapiens GN=AARS PE=1 SV=3	19.3054075439049	19.3374908187695	19.2669968376388	19.4028657871932	19.497015097429	19.4039546181485	19.3277109051727	19.2929105115452	19.693698471233	18.6224799527979	19.0265486055623	18.000377618018	18.4286498070107	19.0761849267677	18.2941192079281	18.6307619907631	18.616162415501	18.7085138274109	19.39201	18.60042	15	AARS	>tr|H3BPK7|H3BPK7_HUMAN Alanine--tRNA ligase, cytoplasmic (Fragment) OS=Homo sapiens GN=AARS PE=1 SV=3	0.791584	18.9962138301553	-5.52643927694446	3.39033087100483e-05	0.00968836904196555	2.45674543732162	9	9	+	+	-
>sp|Q06136|KDSR_HUMAN 3-ketodihydrosphingosine reductase OS=Homo sapiens GN=KDSR PE=1 SV=1	16.8047107942412	17.2393070564365	17.1853389199993	18.2318102093516	18.1076790452249	17.7888632807933	17.2288060128329	17.3207951497279	17.7146653320521	15.6153083884575	17.1672336151078	17.0354684687999	16.3035373896919	15.8721161299951	15.1216276998245	15.0757979781069	15.2615154290561	15.6367221595815	17.51355	15.89881	13	KDSR	>sp|Q06136|KDSR_HUMAN 3-ketodihydrosphingosine reductase OS=Homo sapiens GN=KDSR PE=1 SV=1	1.61474	16.7061835032934	-5.30874061524528	5.32794649342657e-05	0.0143795355917035	2.05062477401412	9	9	-	+	-
>tr|M0R2Z8|M0R2Z8_HUMAN Serine/threonine-protein kinase D2 (Fragment) OS=Homo sapiens GN=PRKD2 PE=1 SV=1	18.4565457624814	18.2827746208829	17.3618624486114	18.5103428690618	18.8170617227421	18.8078952652692	17.9694232679127	17.2542552787426	17.5866027533189	18.2585624612309	16.5699648164307	16.5108176028734	12.7215862908649	12.6955218954773	12.6955218954773	12.6955218954773	12.6955218954773	12.6955218954773	18.11631	14.17095	5	PRKD2	>tr|M0R2Z8|M0R2Z8_HUMAN Serine/threonine-protein kinase D2 (Fragment) OS=Homo sapiens GN=PRKD2 PE=1 SV=1	3.94536	16.1436280354339	-5.24406336420855	6.10024679283213e-05	0.0155973678524097	1.92869329130877	9	9	+	-	+
>sp|Q92562|FIG4_HUMAN Polyphosphoinositide phosphatase OS=Homo sapiens GN=FIG4 PE=1 SV=1	14.1975042558991	13.9876719454368	13.1573894583545	12.3464850201743	14.8774304845658	15.0470202233852	14.2965491754884	14.176296595431	14.2634007541943	15.202595296242	15.5939247013607	15.4541417449512	16.8296159869217	16.9079600340288	17.7312510427923	15.6395434348705	15.4550596730436	15.8003882311747	14.03886	16.06828	42	FIG4	>sp|Q92562|FIG4_HUMAN Polyphosphoinositide phosphatase OS=Homo sapiens GN=FIG4 PE=1 SV=1	-2.02941	15.0535682254619	5.16127123714784	7.25935805213207e-05	0.0165134892300708	1.7717928272726	9	9	-	-	-
>sp|Q6P1M0|S27A4_HUMAN Long-chain fatty acid transport protein 4 OS=Homo sapiens GN=SLC27A4 PE=1 SV=1	18.5937246084272	18.6249938891765	18.8203338389739	18.46597224533	18.633916460602	18.9484676762299	18.5988810351493	18.2926459857345	18.5167098784825	16.7050586561116	17.2288060128329	18.7986504773262	17.1519090764238	17.20030712686	16.960727260211	15.8466958241616	17.2252103931602	17.7378262057949	18.61063	17.20613	34	SLC27A4	>sp|Q6P1M0|S27A4_HUMAN Long-chain fatty acid transport protein 4 OS=Homo sapiens GN=SLC27A4 PE=1 SV=1	1.40449	17.9083798139438	-5.14845024735112	7.45808293115777e-05	0.0165134892300708	1.74741509133827	9	9	-	+	-
>tr|H7C1C2|H7C1C2_HUMAN Actin-binding protein anillin (Fragment) OS=Homo sapiens GN=ANLN PE=1 SV=1	12.6955218954773	12.6955218954773	12.6955218954773	12.6955218954773	12.6955218954773	12.6955218954773	12.6955218954773	12.6955218954773	12.0111766922808	12.6955218954773	12.6955218954773	15.8140703285173	17.1427960697908	16.3986310868561	16.6991464198071	18.3826576356137	18.0276085151063	17.9946799291895	12.61948	16.20563	12	ANLN	>tr|H7C1C2|H7C1C2_HUMAN Actin-binding protein anillin (Fragment) OS=Homo sapiens GN=ANLN PE=1 SV=1	-3.58614	14.4125547573297	5.13759503444387	7.6306921308017e-05	0.0165134892300708	1.72675842999398	9	9	-	-	+
>tr|H3BTR0|H3BTR0_HUMAN Protein ZFP91-CNTF (Fragment) OS=Homo sapiens GN=ZFP91-CNTF PE=4 SV=1	12.6955218954773	12.7742124350717	12.6980389568141	11.4397028642891	11.3562948465429	10.9720321972867	13.9131927357843	14.0741698859694	13.8489573706004	16.3386547379861	14.3121358603311	14.0334397743451	15.8920460513446	14.9876701206314	14.9400928607104	15.6453462218454	14.2279740551945	14.6908658671282	12.64135	15.00758	15	ZFP91-CNTF	>tr|H3BTR0|H3BTR0_HUMAN Protein ZFP91-CNTF (Fragment) OS=Homo sapiens GN=ZFP91-CNTF PE=4 SV=1	-2.36623	13.8244638187418	5.12608168122955	7.81824315133035e-05	0.0165134892300708	1.70483278515244	9	9	-	-	-
>tr|M0QX27|M0QX27_HUMAN Urokinase plasminogen activator surface receptor (Fragment) OS=Homo sapiens GN=PLAUR PE=1 SV=1	18.5031858960025	18.7539798242154	18.3482348083184	20.7375855637002	20.621794989876	20.8308817128908	12.6955218954773	12.6955218954773	17.377747467581	12.6955218954773	12.6955218954773	12.6955218954773	12.7215862908649	12.6955218954773	12.6955218954773	12.6955218954773	12.6955218954773	12.6955218954773	17.84049	12.69842	2	PLAUR	>tr|M0QX27|M0QX27_HUMAN Urokinase plasminogen activator surface receptor (Fragment) OS=Homo sapiens GN=PLAUR PE=1 SV=1	5.14208	15.2694564171235	-5.07974011286602	8.62217109965156e-05	0.0174527113342114	1.61641042133217	9	9	-	-	-
>tr|B1AKT3|B1AKT3_HUMAN Transmembrane emp24 domain-containing protein 5 OS=Homo sapiens GN=TMED5 PE=1 SV=1	20.9800107164491	20.5021644732681	19.1266806903017	20.9642875899752	20.8714878943638	20.6846900921925	19.708635327942	19.5723097964195	18.9877299118904	18.9143026403793	18.7152791401415	19.1144694922918	16.8352278206914	17.9442553296188	16.7079636855064	18.6586207220365	18.5923984567576	18.3466635408233	20.15533	18.20324	7	TMED5	>tr|B1AKT3|B1AKT3_HUMAN Transmembrane emp24 domain-containing protein 5 OS=Homo sapiens GN=TMED5 PE=1 SV=1	1.95209	19.1792876289472	-5.00545181586402	0.000100916932108194	0.0196101782472643	1.47410372040775	9	9	-	-	-
>tr|F5GXT0|F5GXT0_HUMAN Double-strand break repair protein MRE11A OS=Homo sapiens GN=MRE11A PE=1 SV=1	18.9329012576888	17.7713573848838	18.7152791401415	18.6346823984028	18.7539798242154	18.2784842212569	18.5315979064017	18.2820344775578	18.6882306920926	19.5397357247062	19.5186277332354	18.8238111868664	20.6232276499468	19.5897891550907	19.9859080082045	19.3606918746722	19.1980250712202	19.3994593994248	18.50984	19.55992	11	MRE11A	>tr|F5GXT0|F5GXT0_HUMAN Double-strand break repair protein MRE11A OS=Homo sapiens GN=MRE11A PE=1 SV=1	-1.05008	19.0348790614449	4.90400030657061	0.000125226946473184	0.0233981733064126	1.27868813738337	9	9	-	-	+
>tr|K7EQL0|K7EQL0_HUMAN Cold-inducible RNA-binding protein OS=Homo sapiens GN=CIRBP PE=1 SV=1	19.1399366507041	17.8902168003405	17.8433931646908	19.1082864721376	19.4167936282048	19.3672978554631	12.6955218954773	17.5714989045206	12.6955218954773	12.6955218954773	12.6955218954773	12.6955218954773	12.7215862908649	12.6955218954773	12.6955218954773	12.6955218954773	14.8518865760911	12.6955218954773	17.30316	12.93801	6	CIRBP	>tr|K7EQL0|K7EQL0_HUMAN Cold-inducible RNA-binding protein OS=Homo sapiens GN=CIRBP PE=1 SV=1	4.36515	15.1205885223507	-4.86086962818848	0.000137303243378091	0.0247044131974357	1.19524858133129	9	9	+	-	+
>tr|J3QSB7|J3QSB7_HUMAN S-methyl-5'-thioadenosine phosphorylase OS=Homo sapiens GN=MTAP PE=1 SV=1	19.3287405420542	18.4510737395967	18.5858600585532	18.8712298106499	18.6254788518118	18.9884121027969	18.674857854798	18.8796041870968	19.1382740453691	17.4764805294678	17.4560510485561	18.3524444925561	17.6897223390161	17.4507112275037	17.6502224558743	18.4431592145223	18.3700082146057	18.3763060448857	18.83817	17.91835	15	MTAP	>tr|J3QSB7|J3QSB7_HUMAN S-methyl-5'-thioadenosine phosphorylase OS=Homo sapiens GN=MTAP PE=1 SV=1	0.919825	18.3782575977619	-4.83913294530116	0.000143833623022232	0.0249551335943573	1.15311826933141	9	9	+	-	+
>tr|E9PJT3|E9PJT3_HUMAN Splicing factor 3B subunit 2 (Fragment) OS=Homo sapiens GN=SF3B2 PE=1 SV=1	17.9866878639865	18.8779518098606	18.9349142684335	18.3170932654706	18.5763956660031	18.4112783892558	18.8249153106666	19.2884376285791	19.9784114555459	19.6333000192027	19.3606918746722	20.0416368326034	19.9492585421759	19.7825966745758	20.0623692641269	19.9728789099253	19.756230202203	20.1774316769149	18.79957	19.8596	13	SF3B2	>tr|E9PJT3|E9PJT3_HUMAN Splicing factor 3B subunit 2 (Fragment) OS=Homo sapiens GN=SF3B2 PE=1 SV=1	-1.06003	19.3295822030112	4.80057067922724	0.000156209592819587	0.0261678000661225	1.07824887604243	9	9	-	-	+
>tr|H0YHW7|H0YHW7_HUMAN Low-density lipoprotein receptor-related protein 10 (Fragment) OS=Homo sapiens GN=LRP10 PE=1 SV=1	14.5925017243534	15.1776350109283	15.160557447044	15.7137493968308	15.7259498650154	15.7722199166282	13.4726297290301	12.6955218954773	13.4726297290301	12.8298022901931	12.6955218954773	13.5684883948375	12.7215862908649	12.6955218954773	12.6955218954773	11.7350629092241	12.6955218954773	12.6955218954773	14.6426	12.70362	16	LRP10	>tr|H0YHW7|H0YHW7_HUMAN Low-density lipoprotein receptor-related protein 10 (Fragment) OS=Homo sapiens GN=LRP10 PE=1 SV=1	1.93898	13.6731080042691	-4.77099564440391	0.000166433513602257	0.0267925538915342	1.02072006043186	9	9	-	+	-
>sp|Q9NTJ5|SAC1_HUMAN Phosphatidylinositide phosphatase SAC1 OS=Homo sapiens GN=SACM1L PE=1 SV=2	20.6947888842498	20.3646513390807	20.5752063100343	21.5271810201904	21.6846505089311	21.6242231004992	20.6809630820912	20.5687748991281	20.7143011336708	20.3020276180384	19.8595605313957	19.6356946742063	19.69451616952	19.684986983533	19.6444930085612	19.5903551974236	20.2950558417072	20.4748811554807	20.93719	19.90906	33	SACM1L	>sp|Q9NTJ5|SAC1_HUMAN Phosphatidylinositide phosphatase SAC1 OS=Homo sapiens GN=SACM1L PE=1 SV=2	1.02813	20.423128414319	-4.74685528186216	0.000175283016291176	0.0267925538915342	0.97369447374035	9	9	-	-	-
>tr|H3BRR1|H3BRR1_HUMAN DNA-binding protein SMUBP-2 OS=Homo sapiens GN=IGHMBP2 PE=1 SV=1	19.3167026725355	18.8595800876235	18.8945671916618	18.6080161368001	19.3198765210719	18.3968615176074	18.0767751132779	18.3176254042976	18.5347899851006	21.2743882667948	21.5319001632131	19.263774159259	19.5000571394748	19.6173520720492	19.21834798525	21.6504921437711	21.6002083265146	21.5683212096512	18.70275	20.58054	5	IGHMBP2	>tr|H3BRR1|H3BRR1_HUMAN DNA-binding protein SMUBP-2 OS=Homo sapiens GN=IGHMBP2 PE=1 SV=1	-1.87778	19.6416464497752	4.74367392071806	0.000176484504843371	0.0267925538915342	0.967492652994129	9	9	+	+	+
>tr|F8VY03|F8VY03_HUMAN Methionine aminopeptidase 2 (Fragment) OS=Homo sapiens GN=METAP2 PE=1 SV=1	17.2008790547627	16.4241109087448	14.742497742085	15.0792562896898	12.6955218954773	12.6955218954773	15.6828672479518	12.6955218954773	15.202595296242	17.3947766858345	18.2916308943847	16.8710676646749	19.4494096361085	18.1570072013317	16.1897318471298	17.4747732428026	17.863176165819	17.0925523016362	14.7132	17.64268	8	METAP2	>tr|F8VY03|F8VY03_HUMAN Methionine aminopeptidase 2 (Fragment) OS=Homo sapiens GN=METAP2 PE=1 SV=1	-2.92948	16.1779387703128	4.71162616172662	0.000189066212971445	0.0272441698596581	0.904960309822997	9	9	+	-	-
>tr|K7EMQ3|K7EMQ3_HUMAN Dynamin-2 (Fragment) OS=Homo sapiens GN=DNM2 PE=1 SV=2	21.0001651048983	20.7981684723219	20.6564166925857	21.3837817397692	21.0987491515691	21.2697333660096	20.7311520676067	20.7006344527661	20.7556688955476	20.2636736411934	20.6129395128973	20.6947888842498	20.3463058276134	19.987456577657	19.9649300099087	20.1379494966336	20.1367412294396	19.9815005651723	20.93272	20.23625	13	DNM2	>tr|K7EMQ3|K7EMQ3_HUMAN Dynamin-2 (Fragment) OS=Homo sapiens GN=DNM2 PE=1 SV=2	0.696465	20.5844864271022	-4.70768453139612	0.000190675540392831	0.0272441698596581	0.897262133461891	9	9	+	-	-
>sp|Q6QNY1|BL1S2_HUMAN Biogenesis of lysosome-related organelles complex 1 subunit 2 OS=Homo sapiens GN=BLOC1S2 PE=1 SV=1	12.6955218954773	12.6955218954773	12.6955218954773	14.4516038475495	16.754100802581	15.3010442715998	14.6264510029664	14.5593831171402	16.8696179330335	16.4189822780866	15.9604108064516	18.0141904659368	18.3217851349341	18.9455066461319	19.5139879257341	16.9401738318463	16.7440869359502	17.1375517514682	14.51653	17.55519	6	BLOC1S2	>sp|Q6QNY1|BL1S2_HUMAN Biogenesis of lysosome-related organelles complex 1 subunit 2 OS=Homo sapiens GN=BLOC1S2 PE=1 SV=1	-3.03866	16.0358579132134	4.6620367035311	0.000210361945594349	0.0291982380484957	0.807997932442423	9	9	-	-	+
>tr|C9JLI6|C9JLI6_HUMAN 40S ribosomal protein S27 OS=Homo sapiens GN=RPS27L PE=1 SV=1	23.317758082668	23.8869924523447	23.4209468442064	23.396531121035	23.4991055040304	23.0732899006661	23.8152403335317	23.6699041197366	24.0143920744982	24.1969667111635	24.5497188035286	24.3908922820271	24.3547279513449	24.1205877577748	24.7055897701946	24.0646035088697	24.1380548946809	23.9063672919955	23.56602	24.26972	4	RPS27L	>tr|C9JLI6|C9JLI6_HUMAN 40S ribosomal protein S27 OS=Homo sapiens GN=RPS27L PE=1 SV=1	-0.703705	23.9178705224609	4.63597353344328	0.00022251813321358	0.0298183875753041	0.756940948557276	9	9	-	-	+
>tr|H0YLN9|H0YLN9_HUMAN Intron-binding protein aquarius (Fragment) OS=Homo sapiens GN=AQR PE=1 SV=1	12.9754751805042	12.905925064748	12.8011732545103	12.6955218954773	12.6955218954773	13.895317054267	13.556856815331	12.6955218954773	12.6955218954773	14.6264510029664	15.6919009860123	13.9100664680365	12.7215862908649	15.6828672479518	15.7783059496436	14.7698942757388	17.2155279802177	17.260175150909	12.99076	15.2952	9	AQR	>tr|H0YLN9|H0YLN9_HUMAN Intron-binding protein aquarius (Fragment) OS=Homo sapiens GN=AQR PE=1 SV=1	-2.30444	14.1429783502006	4.62651216238487	0.000227105874904539	0.0298183875753041	0.738390503303399	9	9	-	+	+
>tr|H0YG10|H0YG10_HUMAN Nucleolar GTP-binding protein 2 (Fragment) OS=Homo sapiens GN=GNL2 PE=1 SV=2	19.301532824247	19.0483224369002	19.2061135291037	19.8106181329661	20.055913008871	19.1797364204306	17.6228983513123	17.6826603319834	17.4250533291575	15.3251522638702	16.2350209257916	17.3183488500984	17.1258560523369	15.9879253054638	15.0038679997783	17.9600882350204	17.7489654998117	17.4085033206283	18.81476	16.6793	14	GNL2	>tr|H0YG10|H0YG10_HUMAN Nucleolar GTP-binding protein 2 (Fragment) OS=Homo sapiens GN=GNL2 PE=1 SV=2	2.13546	17.7470320454317	-4.51366272679871	0.000289852027469595	0.0370552934065077	0.516509197454138	9	9	-	+	+
>tr|E7ESS4|E7ESS4_HUMAN Intercellular adhesion molecule 1 OS=Homo sapiens GN=ICAM1 PE=1 SV=1	19.8168954315833	20.337136729837	20.1198720563864	21.447683694269	21.2285479214785	21.2389525727833	20.0774278844672	19.9843044954547	20.5681710887864	19.8168954315833	19.1571833924939	19.264799181108	19.566408717843	19.7741252167991	19.6583886715656	19.6507010182664	19.2574967043338	19.4577779313476	20.53544	19.51153	14	ICAM1	>tr|E7ESS4|E7ESS4_HUMAN Intercellular adhesion molecule 1 OS=Homo sapiens GN=ICAM1 PE=1 SV=1	1.02391	20.0234871189104	-4.49256646431282	0.000303409159770492	0.0377938896965397	0.474908923149075	9	9	-	+	-
>tr|F5GZ03|F5GZ03_HUMAN T-complex protein 1 subunit alpha (Fragment) OS=Homo sapiens GN=TCP1 PE=1 SV=1	21.1412400572519	20.2696030912944	20.5579495800979	20.5371486788113	20.3690155669691	20.6803049847152	20.5208719962853	20.2585008146993	20.5398434329409	21.0030073342112	21.2365832609599	21.496802246045	21.6630202609788	20.8497416616836	21.1636531460132	21.1348995874699	21.0769352671316	21.0545883174213	20.54161	21.18658	11	TCP1	>tr|F5GZ03|F5GZ03_HUMAN T-complex protein 1 subunit alpha (Fragment) OS=Homo sapiens GN=TCP1 PE=1 SV=1	-0.644973	20.8640949602766	4.47244021559461	0.00031694296909433	0.0380129465636712	0.43518779519506	9	9	+	-	-
>sp|Q96DX4|RSPRY_HUMAN RING finger and SPRY domain-containing protein 1 OS=Homo sapiens GN=RSPRY1 PE=1 SV=1	13.0189691246889	13.7527799497472	13.1436787482651	12.6955218954773	12.6955218954773	12.6955218954773	13.4638839521785	13.2103918530544	13.2808376896873	15.7509142042346	15.6213760364549	15.4908552555655	14.7789197624658	12.6412137538939	14.187129899421	14.6419845677212	14.2473466167383	14.2831963801317	13.10635	14.62699	26	RSPRY1	>sp|Q96DX4|RSPRY_HUMAN RING finger and SPRY domain-containing protein 1 OS=Homo sapiens GN=RSPRY1 PE=1 SV=1	-1.52065	13.86666908226	4.46683898314311	0.000320817375280058	0.0380129465636712	0.424127477231403	9	9	-	-	-
>tr|Q5T4L4|Q5T4L4_HUMAN 40S ribosomal protein S27 OS=Homo sapiens GN=RPS27 PE=1 SV=1	24.5684571698282	24.7775357081644	24.170826998095	24.1135858502118	24.3005531840734	24.1205877577748	24.7055897701946	24.5795180815417	24.3908922820271	25.1291479214975	25.2329413745109	25.1482934214065	24.6945655482076	24.8167336049091	24.9823223755503	25.1332959862802	24.8713734121272	24.9268790249893	24.41417	24.99284	3	RPS27	>tr|Q5T4L4|Q5T4L4_HUMAN 40S ribosomal protein S27 OS=Homo sapiens GN=RPS27 PE=1 SV=1	-0.578667	24.7035055261883	4.42944776520931	0.000347942199876259	0.0402453144523539	0.350231629591453	9	9	-	-	+
>sp|Q5TA45|INT11_HUMAN Integrator complex subunit 11 OS=Homo sapiens GN=CPSF3L PE=1 SV=2	13.9459500203802	13.3110135707889	13.3110135707889	14.8041256204904	14.9086976779081	15.2522248592358	15.01456225114	15.1401306443261	15.5321209989935	16.4269892041807	15.4033965589785	15.4116572607706	16.5091351501281	16.537284924306	15.5974668226912	16.1427815316503	15.6250696726635	16.2703142188511	14.57998	15.99157	29	CPSF3L	>sp|Q5TA45|INT11_HUMAN Integrator complex subunit 11 OS=Homo sapiens GN=CPSF3L PE=1 SV=2	-1.41158	15.2857741421262	4.41002533539723	0.000362938477140564	0.0403538910238643	0.311805670076243	9	9	+	-	-
>tr|E7EQR9|E7EQR9_HUMAN Dystrophin OS=Homo sapiens GN=DMD PE=1 SV=2	14.2100968439048	14.2667616310364	15.0685736920293	15.2513214999096	14.7137103977484	15.2565848569104	14.1051624427383	13.997326740536	14.1924018146618	15.7776923771425	16.7678390347308	14.8207681843943	16.3436200544298	16.4084364852319	16.3537875894307	15.1713880533882	15.363202371914	15.3358809431222	14.56244	15.81585	46	DMD	>tr|E7EQR9|E7EQR9_HUMAN Dystrophin OS=Homo sapiens GN=DMD PE=1 SV=2	-1.25341	15.1891419451811	4.40679652042122	0.000365494278519973	0.0403538910238643	0.305414993911528	9	9	-	-	+
>tr|C9JCJ5|C9JCJ5_HUMAN Uncharacterized protein (Fragment) OS=Homo sapiens PE=4 SV=8	21.1122340126326	20.8196920669042	20.8688036852098	15.6835431734507	19.6310558412414	19.8314638134627	21.8015879631557	22.2089611109354	21.3994697018677	20.753396899229	19.5397357247062	14.5505929795961	15.8888408362946	15.1041483961149	15.0956663318387	14.9974890382221	13.5739275415723	13.7245948272164	20.37298	15.91427	8	>tr|C9JCJ5|C9JCJ5_HUMAN Uncharacterized protein (Fragment) OS=Homo sapiens PE=4 SV=8	>tr|C9JCJ5|C9JCJ5_HUMAN Uncharacterized protein (Fragment) OS=Homo sapiens PE=4 SV=8	4.45871	18.1436224413139	-4.36695005175705	0.000398578783383834	0.0429905632363783	0.226487167857099	9	9	-	-	-
>tr|X6RJY0|X6RJY0_HUMAN U3 small nucleolar RNA-associated protein 14 homolog A (Fragment) OS=Homo sapiens GN=UTP14A PE=1 SV=1	15.0675783201967	14.7070367362971	16.4269892041807	14.7813512362476	16.1238631779746	15.692454450606	16.4843753648019	16.4051009338169	18.8622483171392	19.0433863115461	19.031534828681	16.925172567208	18.1533788399551	18.0865645045941	18.0788962123521	17.6712254868799	17.3865726492313	18.967574407622	16.06122	18.14937	11	UTP14A	>tr|X6RJY0|X6RJY0_HUMAN U3 small nucleolar RNA-associated protein 14 homolog A (Fragment) OS=Homo sapiens GN=UTP14A PE=1 SV=1	-2.08815	17.1052946416295	4.35725910635799	0.000407074085811734	0.0429905632363783	0.2072746950792	9	9	-	-	-
>tr|I3L312|I3L312_HUMAN Protein disulfide-isomerase (Fragment) OS=Homo sapiens GN=P4HB PE=1 SV=2	22.5266976994381	22.8674131153113	22.8038098577257	23.2067368894076	23.4890763131079	23.1253712152101	22.9370844478237	22.8794788934844	22.3934224036314	22.3033565674066	22.6150278752757	22.4598234518647	21.7120463998362	21.9150269901235	22.0877755822716	22.453478177332	22.2635525408245	21.867820648297	22.91434	22.18643	13	P4HB	>tr|I3L312|I3L312_HUMAN Protein disulfide-isomerase (Fragment) OS=Homo sapiens GN=P4HB PE=1 SV=2	0.727909	22.5503888371318	-4.32665331252243	0.000435127275166197	0.0446524675630757	0.146557111187233	9	9	-	-	-
>sp|Q12874|SF3A3_HUMAN Splicing factor 3A subunit 3 OS=Homo sapiens GN=SF3A3 PE=1 SV=1	18.6459915514036	19.0158247511369	19.1448138035301	18.6686199460712	19.6432030967164	19.0421438407209	20.2787442612318	19.5840111550494	19.4206130521183	19.5986361311957	20.2145412808905	20.5304876022984	20.5699823865782	20.1531044409037	19.7591998898468	20.3735544079256	20.2499511286344	20.289214325152	19.27155	20.19319	22	SF3A3	>sp|Q12874|SF3A3_HUMAN Splicing factor 3A subunit 3 OS=Homo sapiens GN=SF3A3 PE=1 SV=1	-0.921634	19.732368725078	4.32029813560577	0.000441193586461019	0.0446524675630757	0.13394171530757	9	9	-	-	+
>tr|M0R118|M0R118_HUMAN Syntaxin-binding protein 2 (Fragment) OS=Homo sapiens GN=STXBP2 PE=1 SV=1	18.9349142684335	20.1446727892412	20.0741602644339	20.671378989048	19.3624256982185	19.4362950971685	19.6107275940295	19.5102734964818	20.1691286926523	18.8694377053042	18.1277716029903	19.2256170809314	18.4302840136248	19.1440124552026	19.1912169701443	18.3669808614557	18.913112508355	18.8272522700159	19.76822	18.78841	8	STXBP2	>tr|M0R118|M0R118_HUMAN Syntaxin-binding protein 2 (Fragment) OS=Homo sapiens GN=STXBP2 PE=1 SV=1	0.97981	19.2783145754295	-4.2950263040077	0.000466175882596167	0.0462180089316771	0.0837506426514771	9	9	-	-	-
>tr|H7BY16|H7BY16_HUMAN Nucleolin (Fragment) OS=Homo sapiens GN=NCL PE=1 SV=6	23.7200161025528	23.3837930684934	23.8540733265519	22.9595700510963	23.2274366649403	23.178806120628	23.5907330997124	23.9166267762704	23.9569945064958	24.2009202998833	24.2259114801222	24.1205877577748	23.9241483563179	23.8750442475469	24.1650298249742	24.4778561638155	24.4809286588548	24.4852471632954	23.53201	24.2173	17	NCL	>tr|H7BY16|H7BY16_HUMAN Nucleolin (Fragment) OS=Homo sapiens GN=NCL PE=1 SV=6	-0.685292	23.8746513149626	4.26457548024233	0.000498187611330623	0.0483337475150778	0.0232226996296845	9	9	-	+	+
>sp|Q9P2X0|DPM3_HUMAN Dolichol-phosphate mannosyltransferase subunit 3 OS=Homo sapiens GN=DPM3 PE=1 SV=2	18.912779777105	18.9155642149827	17.7882769715105	19.3600750520867	19.462871442775	19.3216744661161	18.0952425584121	18.5194735487508	18.4401809801961	16.6344281431564	17.8076948582448	17.2948039800754	18.3651324668837	16.7260043549169	17.915797467472	18.40429726041	17.3246805020314	16.514365047694	18.75735	17.44302	3	DPM3	>sp|Q9P2X0|DPM3_HUMAN Dolichol-phosphate mannosyltransferase subunit 3 OS=Homo sapiens GN=DPM3 PE=1 SV=2	1.31433	18.1001857273789	-4.24287807242156	0.000522345477680592	0.0483337475150778	-0.0199382791328704	9	9	-	+	-
>sp|Q63ZY6|NSN5C_HUMAN Putative methyltransferase NSUN5C OS=Homo sapiens GN=NSUN5P2 PE=5 SV=2	17.2694494226555	17.205792854515	17.0146251921696	18.0495922731845	18.1346355539992	17.9738507904268	16.6193939004204	16.4404505289202	17.3285346890682	16.7003829263278	16.5168162815743	16.3906007603485	15.9058330507385	15.5350610850146	15.8721161299951	16.7491646966785	16.5566728778144	16.2105369672137	17.33737	16.2708	17	NSUN5P2	>sp|Q63ZY6|NSN5C_HUMAN Putative methyltransferase NSUN5C OS=Homo sapiens GN=NSUN5P2 PE=5 SV=2	1.06657	16.8040838878369	-4.23897543256202	0.00052681471583279	0.0483337475150778	-0.0277042561223375	9	9	-	-	-
>tr|H7C441|H7C441_HUMAN THO complex subunit 5 homolog (Fragment) OS=Homo sapiens GN=THOC5 PE=1 SV=2	15.9185085268503	16.3028295792963	16.1748441219274	15.240820368531	15.5224219206555	15.5098571680676	15.1866881678992	15.1371014893048	14.6274833207174	14.1504689484959	14.2634007541943	15.4053993485292	12.7215862908649	12.6955218954773	12.6955218954773	12.6955218954773	14.3463676361348	15.1952875082389	15.51339	13.79656	11	THOC5	>tr|H7C441|H7C441_HUMAN THO complex subunit 5 homolog (Fragment) OS=Homo sapiens GN=THOC5 PE=1 SV=2	1.71683	14.6549794908966	-4.23591503675589	0.000530346450506916	0.0483337475150778	-0.0337948031752076	9	9	+	-	+
>tr|K7EPG3|K7EPG3_HUMAN Interleukin enhancer-binding factor 3 (Fragment) OS=Homo sapiens GN=ILF3 PE=1 SV=1	20.554476341041	20.1335455326951	20.3610921167545	20.8462648662839	17.8525311019302	20.7049837259509	20.02232492235	19.6370272542943	17.7278035551586	12.6955218954773	12.6955218954773	15.0832278894275	12.7215862908649	12.6955218954773	12.6955218954773	19.8464872220031	19.6329218520777	18.2442236130275	19.76001	15.14561	5	ILF3	>tr|K7EPG3|K7EPG3_HUMAN Interleukin enhancer-binding factor 3 (Fragment) OS=Homo sapiens GN=ILF3 PE=1 SV=1	4.61439	17.4528102147649	-4.22846172864607	0.000539048083831267	0.0483337475150778	-0.0486298579062687	9	9	+	+	+
>tr|A0A087WTK2|A0A087WTK2_HUMAN E3 ubiquitin-protein ligase BRE1B (Fragment) OS=Homo sapiens GN=RNF40 PE=1 SV=1	13.3685331581222	14.9910830645744	15.4673078921712	15.3780367625981	14.8648353603367	15.103168445853	15.6297107789042	15.6041317769851	15.4830739571969	16.3048218126233	15.9588820227721	15.9163287608333	15.6136358874623	16.1440022573605	16.8819330156649	16.1349610567556	17.0503661540851	17.099610121612	15.09888	16.34495	10	RNF40	>tr|A0A087WTK2|A0A087WTK2_HUMAN E3 ubiquitin-protein ligase BRE1B (Fragment) OS=Homo sapiens GN=RNF40 PE=1 SV=1	-1.24607	15.7219123492173	4.22157867450677	0.000547212044736369	0.0483337475150778	-0.0623324858744736	9	9	-	+	+
>tr|E9PI41|E9PI41_HUMAN Exosome complex component RRP41 (Fragment) OS=Homo sapiens GN=EXOSC4 PE=1 SV=6	19.3815070845465	18.7188491587241	18.3067757156817	19.5146324213132	19.21834798525	19.7605273327571	19.3964451072796	19.9036834370312	19.8899855257903	18.7678789324858	19.5006415273408	18.2627882109675	16.9602875537943	17.7994041173326	16.5480161414265	18.0835979306143	16.8192465405323	17.6995634256833	19.34342	17.82682	12	EXOSC4	>tr|E9PI41|E9PI41_HUMAN Exosome complex component RRP41 (Fragment) OS=Homo sapiens GN=EXOSC4 PE=1 SV=6	1.51659	18.5851210082528	-4.1993973625251	0.000574380924043559	0.0498275451607788	-0.10650709686981	9	9	+	-	+
>sp|Q9Y5V3|MAGD1_HUMAN Melanoma-associated antigen D1 OS=Homo sapiens GN=MAGED1 PE=1 SV=3	14.9117895649502	15.8524261668015	15.8524261668015	16.6996300627662	16.2387281751244	16.2261157534943	15.2354312204384	15.363202371914	15.1409716288724	14.465167365637	14.2042586117156	12.7481740288364	12.7215862908649	12.6955218954773	12.6955218954773	14.8391685496663	15.2942927511259	15.4805551461229	15.72452	13.90492	25	MAGED1	>sp|Q9Y5V3|MAGD1_HUMAN Melanoma-associated antigen D1 OS=Homo sapiens GN=MAGED1 PE=1 SV=3	1.81961	14.8147204247826	-4.18976780533208	0.000586596039042953	0.0499944483801871	-0.125692219956568	9	9	+	-	+
>tr|A0A087X121|A0A087X121_HUMAN Probable ATP-dependent RNA helicase DDX52 (Fragment) OS=Homo sapiens GN=DDX52 PE=1 SV=1	17.3748390092085	17.8302576482345	18.0780023571258	17.2311462411029	18.3788634383381	16.4288515765841	17.7789482450699	18.8805090980788	19.0644234593865	19.5581794312526	20.1496873870526	19.0565751587242	19.1176462106239	18.5334488179997	18.7265218689878	19.1372021258587	19.6990767249942	19.0842955330549	17.89398	19.22918	5	DDX52	>tr|A0A087X121|A0A087X121_HUMAN Probable ATP-dependent RNA helicase DDX52 (Fragment) OS=Homo sapiens GN=DDX52 PE=1 SV=1	-1.3352	18.5615819073154	4.17138731903623	0.000610644700390998	0.0511467578361978	-0.162324263240251	9	9	-	+	+
>tr|E9PIQ8|E9PIQ8_HUMAN Stromal interaction molecule 1 (Fragment) OS=Homo sapiens GN=STIM1 PE=1 SV=1	17.3811814850719	15.4931059929722	16.0852127117844	16.8890956768767	17.1716613030863	17.1343420987194	14.8122802920555	15.1504455641775	14.4545799753619	14.7150955094124	14.4965993923029	13.7625013412579	12.7215862908649	12.6955218954773	12.6955218954773	14.8774304845658	14.9876701206314	15.0717064200272	16.06355	14.00263	8	STIM1	>tr|E9PIQ8|E9PIQ8_HUMAN Stromal interaction molecule 1 (Fragment) OS=Homo sapiens GN=STIM1 PE=1 SV=1	2.06092	15.0330854694513	-4.14119204535733	0.000652331510532892	0.0534513415624476	-0.222536302362265	9	9	-	-	-
>tr|F5H2L3|F5H2L3_HUMAN DNA damage-binding protein 1 (Fragment) OS=Homo sapiens GN=DDB1 PE=1 SV=1	20.67379546724	20.9922222306133	21.1731803870775	20.8840300279692	20.8627323146958	21.031877371979	20.6551251140674	20.8432575252967	19.2712720022464	20.2417283149435	20.222541086195	20.222541086195	18.1660973109166	18.6415569555551	18.2437816397972	19.462871442775	19.4343012036829	19.4395872495925	20.70972	19.34167	9	DDB1	>tr|F5H2L3|F5H2L3_HUMAN DNA damage-binding protein 1 (Fragment) OS=Homo sapiens GN=DDB1 PE=1 SV=1	1.36805	20.0256943739354	-4.1357359895914	0.000660164778457566	0.0534513415624476	-0.233420355985143	9	9	+	-	+
>tr|K7EJ42|K7EJ42_HUMAN Protein FAM134C (Fragment) OS=Homo sapiens GN=FAM134C PE=1 SV=1	12.6955218954773	14.8705806965254	15.8349233030004	12.6955218954773	12.6955218954773	12.6955218954773	12.6955218954773	12.6955218954773	12.6955218954773	15.3945337410972	16.3002232901637	15.60493269132	12.7215862908649	15.8086435650334	16.7151362251563	15.3879794476154	15.6719675666781	15.5098571680676	13.28602	15.45721	5	FAM134C	>tr|K7EJ42|K7EJ42_HUMAN Protein FAM134C (Fragment) OS=Homo sapiens GN=FAM134C PE=1 SV=1	-2.17119	14.3716120696591	4.09926749109137	0.000715015651333488	0.0556952975163121	-0.30620047386854	9	9	-	-	-
>sp|Q9NVR2|INT10_HUMAN Integrator complex subunit 10 OS=Homo sapiens GN=INTS10 PE=1 SV=2	14.4599334233593	14.222506775459	14.829649901736	14.7137103977484	15.5310489681698	15.5237346876772	14.7632201643003	15.228085082684	15.0122975067409	16.4305386722009	16.6530790579415	16.2159174590582	16.0686351438627	17.3553942558991	17.8097074491025	14.9876701206314	15.1946734978976	15.9531976337568	14.92047	16.29653	35	INTS10	>sp|Q9NVR2|INT10_HUMAN Integrator complex subunit 10 OS=Homo sapiens GN=INTS10 PE=1 SV=2	-1.37607	15.6085000110125	4.09865559370808	0.000715974151824337	0.0556952975163121	-0.307422070744477	9	9	-	-	-
>tr|C9J4P8|C9J4P8_HUMAN Peptidyl-prolyl cis-trans isomerase (Fragment) OS=Homo sapiens GN=FKBP9 PE=1 SV=6	15.5901408437907	13.7811071665751	14.1217799573709	15.1137091143269	14.4943046076173	14.4016055663977	15.726879745186	15.60493269132	13.992264846185	17.6961139140053	15.5491210384206	17.2653008891692	16.6572767558678	15.334667018516	15.9566793053922	16.5995250936071	16.7483968734801	15.1205683755382	14.75852	16.32529	11	FKBP9	>tr|C9J4P8|C9J4P8_HUMAN Peptidyl-prolyl cis-trans isomerase (Fragment) OS=Homo sapiens GN=FKBP9 PE=1 SV=6	-1.56677	15.5419096557092	4.09465469484295	0.000722273310730272	0.0556952975163121	-0.315409834466237	9	9	-	-	-
>tr|E7ETR0|E7ETR0_HUMAN RuvB-like 1 OS=Homo sapiens GN=RUVBL1 PE=1 SV=1	20.9883427788358	19.6724037399546	19.1743301716174	18.9627608841159	18.9455066461319	18.5257373097256	20.01256884843	19.6650026496292	19.8150549951564	19.9087242104012	21.4670008982503	20.4562109194694	21.2201963689864	20.5472749164225	20.7427223258612	20.2437948942031	20.9453871152662	20.9356251285364	19.52908	20.71855	14	RUVBL1	>tr|E7ETR0|E7ETR0_HUMAN RuvB-like 1 OS=Homo sapiens GN=RUVBL1 PE=1 SV=1	-1.18947	20.1238136000552	4.05958708334154	0.000779930504634771	0.0591010644795718	-0.385445872139085	9	9	+	+	+
>tr|F5GY56|F5GY56_HUMAN Pre-mRNA-processing factor 19 (Fragment) OS=Homo sapiens GN=PRPF19 PE=1 SV=1	21.0198472815463	20.7873473449805	21.0398027578003	20.1004231486085	19.7544740060866	20.5187534610674	21.3479129431328	21.80389948149	20.9667390037044	21.9212682406962	21.8871052274288	21.7360738861894	21.7301891741441	22.0658693232747	21.9196126613393	21.9877793220102	21.0039396794612	21.7743665093549	20.81547	21.78069	10	PRPF19	>tr|F5GY56|F5GY56_HUMAN Pre-mRNA-processing factor 19 (Fragment) OS=Homo sapiens GN=PRPF19 PE=1 SV=1	-0.965223	21.2980779695731	4.05328591262833	0.000790771756107897	0.0591010644795718	-0.398034662718233	9	9	+	+	+
>tr|E5RG99|E5RG99_HUMAN Protein NDRG1 (Fragment) OS=Homo sapiens GN=NDRG1 PE=1 SV=1	18.2528838396275	18.0835979306143	18.7498649112566	19.6034333643395	19.7471810790563	19.5323195108252	17.9348009400367	17.9487768420901	17.8049008314802	16.3203650833569	17.5570111921158	18.3360549097234	12.7215862908649	15.9828627135289	17.0945557123694	16.4353401805307	15.6965694977344	12.6955218954773	18.62864	15.8711	3	NDRG1	>tr|E5RG99|E5RG99_HUMAN Protein NDRG1 (Fragment) OS=Homo sapiens GN=NDRG1 PE=1 SV=1	2.75754	17.2498681513905	-4.03349196762087	0.000825824284892432	0.0597729559207263	-0.43758774347702	9	9	+	-	+
>sp|Q9Y342|PLLP_HUMAN Plasmolipin OS=Homo sapiens GN=PLLP PE=1 SV=1	17.8782385397333	15.1289776546105	14.7039923921576	14.9784771036478	14.6785180500821	15.3138827583931	16.143383874319	15.6476285356068	15.9760725845895	17.4143248251145	17.1284085365622	17.496397208822	18.6189353654729	15.6213760364549	18.5718841028852	16.993385235904	17.1853389199993	17.2079026927131	15.60546	17.35977	7	PLLP	>sp|Q9Y342|PLLP_HUMAN Plasmolipin OS=Homo sapiens GN=PLLP PE=1 SV=1	-1.75431	16.4826180231704	4.02752829865332	0.000836688649382154	0.0597729559207263	-0.449506789698663	9	9	-	+	-
>tr|H0Y9P8|H0Y9P8_HUMAN Replication factor C subunit 1 (Fragment) OS=Homo sapiens GN=RFC1 PE=1 SV=1	15.5709900043351	14.7401105152109	14.3496818035586	16.8649126929207	16.5329378781107	16.6333052563064	17.2194123356055	16.9584883467518	17.2759610889109	18.0182408336952	16.9551509053073	17.9358668633026	17.3214930239377	17.7501497778463	18.5745403199479	17.8292270720999	18.3222241418252	17.5769004559001	16.23842	17.80931	5	RFC1	>tr|H0Y9P8|H0Y9P8_HUMAN Replication factor C subunit 1 (Fragment) OS=Homo sapiens GN=RFC1 PE=1 SV=1	-1.57089	17.0238662953096	4.0240524671432	0.000843086993531403	0.0597729559207263	-0.456454067227077	9	9	-	-	+
>sp|Q07812|BAX_HUMAN Apoptosis regulator BAX OS=Homo sapiens GN=BAX PE=1 SV=1	15.8132008263431	15.4132256391937	15.552770210495	16.4994843805452	15.6353122593339	15.8858459796741	12.6955218954773	13.3325964153026	13.5523841966646	12.6955218954773	14.829649901736	12.6955218954773	12.7215862908649	12.6955218954773	12.6955218954773	12.6955218954773	12.6955218954773	12.6955218954773	14.93115	12.93554	10	BAX	>sp|Q07812|BAX_HUMAN Apoptosis regulator BAX OS=Homo sapiens GN=BAX PE=1 SV=1	1.99561	13.9333461813317	-4.02004121524631	0.000850532157186252	0.0597729559207263	-0.46447191008427	9	9	-	+	+
>tr|Q5JS72|Q5JS72_HUMAN Peripheral plasma membrane protein CASK OS=Homo sapiens GN=CASK PE=1 SV=1	19.1029764981027	19.195537087996	19.1929624634177	20.160782339906	19.3232591160261	20.1851978383384	19.3980879658536	19.3089530696403	19.1297476044007	18.3736381270206	18.7348265255522	17.6306748661197	19.1743301716174	18.8546509755789	17.1926881419023	18.8122075510487	18.6869410695731	18.1927303222597	19.44417	18.40585	24	CASK	>tr|Q5JS72|Q5JS72_HUMAN Peripheral plasma membrane protein CASK OS=Homo sapiens GN=CASK PE=1 SV=1	1.03831	18.9250106519086	-4.00725316922847	0.00087471208862778	0.0597729559207263	-0.490035904707517	9	9	+	-	-
>tr|Q96B60|Q96B60_HUMAN 5'-nucleotidase OS=Homo sapiens GN=NT5E PE=1 SV=1	21.2750064853615	21.8881976939749	22.6053524123069	22.8627699938056	22.921908286649	22.8176960428379	20.8432575252967	20.82161668575	20.5208719962853	19.1366341548855	19.7451090556824	20.1584243267422	21.6137537166903	20.9530068992004	21.1388856645971	19.1150263123509	18.9910010341758	18.8908840556237	21.83963	19.97141	11	NT5E	>tr|Q96B60|Q96B60_HUMAN 5'-nucleotidase OS=Homo sapiens GN=NT5E PE=1 SV=1	1.86822	20.9055223523453	-4.00211990275306	0.000884611578625251	0.0597729559207263	-0.500298717699697	9	9	+	+	-
>sp|Q96AE4|FUBP1_HUMAN Far upstream element-binding protein 1 OS=Homo sapiens GN=FUBP1 PE=1 SV=3	21.6795235841074	21.9625518278231	21.5896115073201	21.8452924012205	21.9169422212142	21.7236349372444	22.2933049525411	22.2056075507725	22.3639270965534	22.3007172285221	22.6981372133984	22.226640871108	22.5513833728324	22.8093573296193	22.9391228488676	22.4073315573665	22.3209728205708	22.5687714338714	21.95338	22.53583	28	FUBP1	>sp|Q96AE4|FUBP1_HUMAN Far upstream element-binding protein 1 OS=Homo sapiens GN=FUBP1 PE=1 SV=3	-0.582449	22.2446017086085	4.00146129175955	0.000885889836618421	0.0597729559207263	-0.50161550787085	9	9	-	-	+
>tr|Q6ZN40|Q6ZN40_HUMAN Tropomyosin 1 (Alpha), isoform CRA_f OS=Homo sapiens GN=TPM1 PE=1 SV=1	22.6322390100355	22.1320869311894	22.7658084794641	22.6887741432498	22.8176960428379	23.1362235992167	22.1451400246815	22.6064141103216	22.7676019322734	23.1929461755302	22.856719251831	23.1985760524697	23.9697040373539	23.5795198451253	23.7879545180996	23.1304000311871	22.9773477033871	23.368930544403	22.63244	23.34023	14	TPM1	>tr|Q6ZN40|Q6ZN40_HUMAN Tropomyosin 1 (Alpha), isoform CRA_f OS=Homo sapiens GN=TPM1 PE=1 SV=1	-0.70779	22.9863379129254	3.9767514838742	0.000935213590941109	0.0622365428053686	-0.551025946987207	9	9	-	-	-
>sp|P30505|1C08_HUMAN HLA class I histocompatibility antigen, Cw-8 alpha chain OS=Homo sapiens GN=HLA-C PE=1 SV=1	17.672631199614	17.4327714562737	17.4752366262935	19.0486365268266	18.3550064629043	18.1378394441991	18.1356008419286	17.9027859040221	17.9965452351076	16.0999671341661	16.6800200623903	17.6203315746216	16.3690249314214	17.4122200949188	18.1566157288134	15.5408892044643	15.7222442008124	15.0234595278063	18.01745	16.51386	17	HLA-C	>sp|P30505|1C08_HUMAN HLA class I histocompatibility antigen, Cw-8 alpha chain OS=Homo sapiens GN=HLA-C PE=1 SV=1	1.50359	17.2656570086991	-3.96363823241179	0.000962500940666224	0.0631868860777908	-0.577252688251264	9	9	-	+	-
>sp|P32455|GBP1_HUMAN Guanylate-binding protein 1 OS=Homo sapiens GN=GBP1 PE=1 SV=2	20.0898436188048	19.7605273327571	17.7888632807933	18.2958958956293	19.0474194556706	19.1987187973807	19.1543265580371	19.0438107007383	19.3152940004492	17.6989233771135	17.7107590271207	19.232691581661	17.541716124679	18.8122075510487	16.5541137246533	16.6101262178243	16.0891467788233	16.3880845634028	19.07719	17.4042	28	GBP1	>sp|P32455|GBP1_HUMAN Guanylate-binding protein 1 OS=Homo sapiens GN=GBP1 PE=1 SV=2	1.67299	18.2406926992548	-3.95243996599461	0.000986435819922807	0.0634554467177656	-0.599651911501183	9	9	-	-	-
>tr|Q5HY81|Q5HY81_HUMAN Ubiquitin-like protein 4A OS=Homo sapiens GN=UBL4A PE=1 SV=2	14.7824262303269	15.9669184602881	16.6698191206748	15.2693996276394	15.7683189320755	15.8397293387883	16.7889714807848	15.9937438757945	16.489799698259	17.993242045851	17.9041687162815	16.922169062397	17.3246805020314	17.6287784097786	17.4871685423604	16.7280006041157	16.0852127117844	16.4506850024739	15.95213	17.16935	9	UBL4A	>tr|Q5HY81|Q5HY81_HUMAN Ubiquitin-like protein 4A OS=Homo sapiens GN=UBL4A PE=1 SV=2	-1.21722	16.5607351312058	3.94798972864348	0.000996112837496036	0.0634554467177656	-0.608554043483245	9	9	-	-	-
>tr|E9PJP4|E9PJP4_HUMAN Band 4.1-like protein 2 (Fragment) OS=Homo sapiens GN=EPB41L2 PE=1 SV=1	18.3415661326228	16.0922654476149	18.3165642372557	17.3388574506014	17.758096320168	17.2214792040257	17.9216574581037	19.3687768039209	18.8653861128524	18.7202963213761	18.2854738106064	19.6760780209613	19.3882582843026	19.2555476064895	19.5495585465773	19.6932910643011	19.6520399408527	19.756230202203	17.91385	19.33075	6	EPB41L2	>tr|E9PJP4|E9PJP4_HUMAN Band 4.1-like protein 2 (Fragment) OS=Homo sapiens GN=EPB41L2 PE=1 SV=1	-1.4169	18.6223012758242	3.93983252608259	0.00101409886290803	0.0634554467177656	-0.624872295756583	9	9	+	-	-
>sp|O95456|PSMG1_HUMAN Proteasome assembly chaperone 1 OS=Homo sapiens GN=PSMG1 PE=1 SV=1	16.8753136844433	14.7966016754426	16.2476083979749	13.9184340841979	12.541984929259	12.6955218954773	16.1427815316503	15.9015938773693	15.5649400212685	16.8900649237113	16.8971848058885	15.893951298472	17.8911924788037	18.9033232595949	19.3374908187695	17.0341549397472	17.4747732428026	16.5043603764659	14.96498	17.42517	13	PSMG1	>sp|O95456|PSMG1_HUMAN Proteasome assembly chaperone 1 OS=Homo sapiens GN=PSMG1 PE=1 SV=1	-2.46019	16.1950709022966	3.9377064583697	0.00101884002552197	0.0634554467177656	-0.629125598148147	9	9	+	-	+
>sp|Q8TC12|RDH11_HUMAN Retinol dehydrogenase 11 OS=Homo sapiens GN=RDH11 PE=1 SV=2	21.2959006666147	21.4576561527529	20.9056413041326	21.1215636055248	21.0398027578003	21.2154571360186	21.1911980464691	20.7210859623793	21.2687472515431	21.1029001763699	20.7216483800673	20.5371486788113	20.3517603347476	19.3089530696403	20.2063586213473	19.5942845910224	20.3840119799991	20.6247002851587	21.13523	20.31464	15	RDH11	>sp|Q8TC12|RDH11_HUMAN Retinol dehydrogenase 11 OS=Homo sapiens GN=RDH11 PE=1 SV=2	0.820587	20.7249343889111	-3.92120179878293	0.00105641071150017	0.0645525197522128	-0.662146085856175	9	9	-	-	-
>tr|B4E349|B4E349_HUMAN N6-adenosine-methyltransferase 70 kDa subunit OS=Homo sapiens GN=METTL3 PE=1 SV=1	16.1189636666406	14.616495187284	15.7398969553841	15.4602890059393	15.4948395154861	16.1779410045272	14.6815484323275	16.0758161157009	15.2317067505656	19.1753582379047	18.2087180097594	15.5491210384206	17.794064448208	16.7509699910212	16.8286191155794	16.3794342184002	16.045196988284	18.6607702137913	15.51083	17.26581	7	METTL3	>tr|B4E349|B4E349_HUMAN N6-adenosine-methyltransferase 70 kDa subunit OS=Homo sapiens GN=METTL3 PE=1 SV=1	-1.75497	16.388319383068	3.91447696292556	0.00107211483740497	0.0645525197522128	-0.675601282685633	9	9	-	-	+
>tr|E5RIK2|E5RIK2_HUMAN Dynamin-3 (Fragment) OS=Homo sapiens GN=DNM3 PE=1 SV=1	20.0248682746645	19.2724892103805	19.3277109051727	19.5535903000047	19.625536312883	19.7235116670053	19.2765410277352	19.3232591160261	19.1303724627065	17.9174753041142	19.3744135819011	18.7882360850052	19.4250288924445	17.8949567069738	18.6174150220008	18.7830940179587	18.6420191090711	18.2206533623255	19.4731	18.62925	22	DNM3	>tr|E5RIK2|E5RIK2_HUMAN Dynamin-3 (Fragment) OS=Homo sapiens GN=DNM3 PE=1 SV=1	0.843843	19.0511761865763	-3.91128101922829	0.00107966006008612	0.0645525197522128	-0.681995973002108	9	9	-	-	-
>tr|H0YAS6|H0YAS6_HUMAN Polyadenylate-binding protein 1 (Fragment) OS=Homo sapiens GN=PABPC1 PE=1 SV=1	21.8066216914848	21.6295525779108	21.5083892788245	21.5822098968806	19.7656448639737	20.6139278183915	20.8727621920953	21.3550763373213	20.9864379671623	22.1363549542922	22.5753790003978	22.6186354235475	22.0580730339536	21.7236349372444	21.7236349372444	21.8412470351028	22.0071387045169	22.0559888739345	21.12451	22.08223	7	PABPC1	>tr|H0YAS6|H0YAS6_HUMAN Polyadenylate-binding protein 1 (Fragment) OS=Homo sapiens GN=PABPC1 PE=1 SV=1	-0.957718	21.6033727513488	3.89576018863855	0.00111706740552344	0.0645525197522128	-0.713052685859858	9	9	+	+	+
>sp|Q96GM8|TOE1_HUMAN Target of EGR1 protein 1 OS=Homo sapiens GN=TOE1 PE=1 SV=1	14.0506381906218	12.6955218954773	12.6955218954773	12.6955218954773	12.4780985641034	14.1577252632518	11.5452852977705	12.6955218954773	12.6955218954773	15.3379335752248	12.6955218954773	15.2093125191591	14.798329713484	14.6500469798486	12.6955218954773	16.5161116383197	16.6323958140849	16.4778923917682	12.8566	15.00145	22	TOE1	>sp|Q96GM8|TOE1_HUMAN Target of EGR1 protein 1 OS=Homo sapiens GN=TOE1 PE=1 SV=1	-2.14486	13.9290235119988	3.89555806605747	0.00111756302937622	0.0645525197522128	-0.713457141283727	9	9	-	-	+
>tr|I1E4Y6|I1E4Y6_HUMAN PERQ amino acid-rich with GYF domain-containing protein 2 OS=Homo sapiens GN=GIGYF2 PE=1 SV=1	19.2985879521319	18.9980427233043	18.9962815238143	18.236708382608	18.7986504773262	18.676108389742	18.1378394441991	18.1431126435169	18.4424611898664	19.5645297002144	19.5668845502145	18.8665361143652	20.0548212110729	18.426615611765	19.7956059979463	19.8742542672252	20.0131006398827	20.0085168079446	18.63642	19.57454	47	GIGYF2	>tr|I1E4Y6|I1E4Y6_HUMAN PERQ amino acid-rich with GYF domain-containing protein 2 OS=Homo sapiens GN=GIGYF2 PE=1 SV=1	-0.938119	19.1054809792856	3.895318791983	0.0011181500373575	0.0645525197522128	-0.713935938773279	9	9	-	+	-
>tr|A0A0A0MTG9|A0A0A0MTG9_HUMAN Protein sprouty homolog 2 OS=Homo sapiens GN=SPRY2 PE=1 SV=1	15.4541417449512	15.0705795351201	15.4132256391937	16.9693516871373	16.6018778709717	16.8439061706826	12.6955218954773	12.6955218954773	12.6955218954773	12.3996652340034	12.6955218954773	12.6955218954773	12.7215862908649	12.6955218954773	12.6955218954773	12.6955218954773	12.6955218954773	12.6955218954773	14.93774	12.66554	17	SPRY2	>tr|A0A0A0MTG9|A0A0A0MTG9_HUMAN Protein sprouty homolog 2 OS=Homo sapiens GN=SPRY2 PE=1 SV=1	2.27219	13.8016418404277	-3.88847981840934	0.00113505938177547	0.0645525197522128	-0.727621201478549	9	9	-	-	-
>tr|K7EN15|K7EN15_HUMAN Soluble calcium-activated nucleotidase 1 OS=Homo sapiens GN=CANT1 PE=1 SV=1	13.8706486594702	16.3891475856246	15.1614391764018	15.557096789883	15.6153083884575	15.9820611315706	12.6955218954773	13.9801577583742	12.6955218954773	12.6955218954773	12.6955218954773	13.9013366179983	12.7215862908649	12.6955218954773	12.6955218954773	12.6955218954773	12.6955218954773	12.6955218954773	14.66077	12.8324	14	CANT1	>tr|K7EN15|K7EN15_HUMAN Soluble calcium-activated nucleotidase 1 OS=Homo sapiens GN=CANT1 PE=1 SV=1	1.82837	13.7465821921078	-3.88540003614247	0.00114275765720261	0.0645525197522128	-0.733784171786609	9	9	-	-	-
>tr|H0Y8L3|H0Y8L3_HUMAN Transforming growth factor-beta-induced protein ig-h3 (Fragment) OS=Homo sapiens GN=TGFBI PE=1 SV=1	19.5500193196328	18.5274923350142	18.5515955824924	18.8869805784376	18.4700295616501	18.2373915916355	17.0137464922883	17.1306747080456	16.4693657396549	19.8207658769025	20.3210976525617	19.6270532053301	20.9505260276722	20.6075217676819	20.1997914515809	18.5278776094987	18.0211530583061	20.8855676950451	18.09303	19.88459	18	TGFBI	>tr|H0Y8L3|H0Y8L3_HUMAN Transforming growth factor-beta-induced protein ig-h3 (Fragment) OS=Homo sapiens GN=TGFBI PE=1 SV=1	-1.79156	18.9888139029684	3.85405979265407	0.00122413593163986	0.068354624780534	-0.796502121455883	9	9	-	-	-
>tr|I3L1T3|I3L1T3_HUMAN Derlin-2 (Fragment) OS=Homo sapiens GN=DERL2 PE=1 SV=1	17.2841385477052	17.3657149337783	16.9369017096829	18.9599816212479	19.2491360853863	18.8462425190552	16.9465476918592	12.6955218954773	16.1328365094517	12.6955218954773	12.6955218954773	17.5887250654772	12.7215862908649	16.8864187977377	12.6955218954773	12.6955218954773	12.6955218954773	12.6955218954773	17.15745	13.70776	5	DERL2	>tr|I3L1T3|I3L1T3_HUMAN Derlin-2 (Fragment) OS=Homo sapiens GN=DERL2 PE=1 SV=1	3.44968	15.432604613366	-3.80482106335927	0.00136387615270785	0.0744389804497147	-0.895040212903719	9	9	-	+	-
>tr|H3BSZ4|H3BSZ4_HUMAN Target of rapamycin complex subunit LST8 (Fragment) OS=Homo sapiens GN=MLST8 PE=1 SV=1	13.5164920945727	13.5993170523699	13.4137308355783	12.6955218954773	12.6955218954773	12.6955218954773	15.5375953870298	15.0509180185209	15.4626179535332	15.9289405339002	15.4501617829758	14.7336325617119	16.6932738778717	16.710483638729	15.4096422512604	15.4583327209158	14.3692523852844	15.718251233313	13.85192	15.608	12	MLST8	>tr|H3BSZ4|H3BSZ4_HUMAN Target of rapamycin complex subunit LST8 (Fragment) OS=Homo sapiens GN=MLST8 PE=1 SV=1	-1.75608	14.7299560007777	3.80352651942047	0.0013677580008637	0.0744389804497147	-0.897630784319099	9	9	+	-	-
>sp|Q8NBX0|SCPDL_HUMAN Saccharopine dehydrogenase-like oxidoreductase OS=Homo sapiens GN=SCCPDH PE=1 SV=1	19.2148357750536	19.1382740453691	19.538061632916	18.5794830422649	18.2958958956293	18.0646695533535	17.1066240053574	17.1600740955643	17.218872793921	17.0709207181159	17.0213330987355	16.627566672234	16.5038469450095	17.1210573837973	17.5790104117433	17.2434169799383	17.0413653113222	16.8896496011389	18.25742	17.01091	18	SCCPDH	>sp|Q8NBX0|SCPDL_HUMAN Saccharopine dehydrogenase-like oxidoreductase OS=Homo sapiens GN=SCCPDH PE=1 SV=1	1.24651	17.6341643311925	-3.79525974621929	0.00139280899756874	0.0744389804497147	-0.914173547581286	9	9	-	+	+
>sp|Q96CW1|AP2M1_HUMAN AP-2 complex subunit mu OS=Homo sapiens GN=AP2M1 PE=1 SV=2	21.4841391815439	21.6779657857864	22.1284749228755	20.5933235143176	21.4128460056254	21.361593953928	20.9679404193123	22.2150992795242	21.228107641662	20.3562406695396	20.3622816722391	21.0697903693168	20.3657577466856	20.96871770306	20.9825901347008	20.0719328278774	20.775545168848	20.7219755489354	21.45217	20.63054	19	AP2M1	>sp|Q96CW1|AP2M1_HUMAN AP-2 complex subunit mu OS=Homo sapiens GN=AP2M1 PE=1 SV=2	0.821629	21.0413512525432	-3.79474298078301	0.00139439012369783	0.0744389804497147	-0.915207638638444	9	9	-	-	-
>sp|P05387|RLA2_HUMAN 60S acidic ribosomal protein P2 OS=Homo sapiens GN=RPLP2 PE=1 SV=1	25.5834912281569	25.165016465773	25.5261040804536	25.4974432561414	25.2630707739105	25.1025239063589	25.0627896768869	24.9080312343582	25.2375184151875	25.7128362130872	26.5501030021993	25.916415113384	25.8873638848635	25.7526950945439	25.6982700793177	25.7234183385535	25.5951911085612	25.5378449152157	25.26067	25.81935	6	RPLP2	>sp|P05387|RLA2_HUMAN 60S acidic ribosomal protein P2 OS=Homo sapiens GN=RPLP2 PE=1 SV=1	-0.558683	25.5400070437196	3.78552641971367	0.00142289320105233	0.0751349475077414	-0.933650392688822	9	9	-	+	-
>sp|Q6STE5|SMRD3_HUMAN SWI/SNF-related matrix-associated actin-dependent regulator of chromatin subfamily D member 3 OS=Homo sapiens GN=SMARCD3 PE=1 SV=1	14.6471956081504	13.8042701542767	14.5375518338722	12.503688017977	12.0479558686718	12.6955218954773	15.1384887182578	15.134304329077	14.6436399624342	17.6859540327022	18.0068404681957	12.7714497479846	23.6616300163563	21.0324959903669	20.2918347736567	15.4868733135495	15.6435607897409	18.4457785489079	13.90585	18.11405	25	SMARCD3	>sp|Q6STE5|SMRD3_HUMAN SWI/SNF-related matrix-associated actin-dependent regulator of chromatin subfamily D member 3 OS=Homo sapiens GN=SMARCD3 PE=1 SV=1	-4.2082	16.0099463372031	3.76614931833378	0.00148473350221014	0.0775573693950201	-0.972422192348399	9	9	+	-	+
>sp|Q9BVK6|TMED9_HUMAN Transmembrane emp24 domain-containing protein 9 OS=Homo sapiens GN=TMED9 PE=1 SV=2	20.6135481083968	20.6176674593292	20.0674738184643	21.1145730565267	21.2550275022832	21.2920930147877	19.9079306978238	20.4030438097379	20.5310285368374	19.507642449679	19.1717380012171	20.7880845575195	18.9240894025617	19.5903551974236	19.8677233596867	20.286162611709	19.3492061262584	19.6965079657172	20.64471	19.68683	11	TMED9	>sp|Q9BVK6|TMED9_HUMAN Transmembrane emp24 domain-containing protein 9 OS=Homo sapiens GN=TMED9 PE=1 SV=2	0.957875	20.1657719819977	-3.74429756179982	0.00155770088017314	0.0778934237952257	-1.01613999619637	9	9	-	-	-
>tr|H0Y5E4|H0Y5E4_HUMAN CD44 antigen (Fragment) OS=Homo sapiens GN=CD44 PE=1 SV=1	22.3614021500925	23.2576384929053	23.6001159192861	24.474429072981	24.7815209761054	24.1346287455794	22.5358064166845	22.6528403123243	22.5727601104751	22.0645681978887	22.5255976288192	22.3007172285221	22.4121598798342	20.6644851173441	22.6640434304879	21.5641366983908	21.8967977063362	22.0985708272883	23.37457	22.02123	11	CD44	>tr|H0Y5E4|H0Y5E4_HUMAN CD44 antigen (Fragment) OS=Homo sapiens GN=CD44 PE=1 SV=1	1.35334	22.6979010506303	-3.74102597659979	0.00156892957990111	0.0778934237952257	-1.02268469892771	9	9	+	+	-
>sp|Q13641|TPBG_HUMAN Trophoblast glycoprotein OS=Homo sapiens GN=TPBG PE=1 SV=1	19.808970223393	19.5975164198626	19.8248589362058	20.6931799314732	20.3903537991123	20.7150274014402	18.5982708082579	18.616162415501	19.4439461821002	16.6408945157803	18.05555773511	16.2898999688336	18.6813400233534	19.7256164561628	19.8844354842109	17.1172125453199	17.1027010068228	17.6523454975356	19.74314	17.90556	21	TPBG	>sp|Q13641|TPBG_HUMAN Trophoblast glycoprotein OS=Homo sapiens GN=TPBG PE=1 SV=1	1.83759	18.8243494083597	-3.74001130711014	0.00157242852062645	0.0778934237952257	-1.02471447787212	9	9	-	-	-
>sp|O75152|ZC11A_HUMAN Zinc finger CCCH domain-containing protein 11A OS=Homo sapiens GN=ZC3H11A PE=1 SV=3	15.8956321090323	16.0068844232936	15.8583605023741	15.7736147456448	15.8848496252348	16.1271143420781	14.0119285778336	13.7824573744489	14.0490117069564	13.0739557147486	13.0301983214099	16.1025811890908	12.7215862908649	12.6955218954773	12.6955218954773	14.0134586750809	13.3841847114608	13.6082585459747	15.26554	13.48059	37	ZC3H11A	>sp|O75152|ZC11A_HUMAN Zinc finger CCCH domain-containing protein 11A OS=Homo sapiens GN=ZC3H11A PE=1 SV=3	1.78495	14.3730622581379	-3.73985836425906	0.00157295659756392	0.0778934237952257	-1.02502042842024	9	9	-	-	-
>sp|O43663|PRC1_HUMAN Protein regulator of cytokinesis 1 OS=Homo sapiens GN=PRC1 PE=1 SV=2	15.88689767809	13.1409153496934	13.5782233840661	14.0741698859694	14.5103344883414	14.7680793534624	13.6981507885137	14.4421512722767	14.0134586750809	16.4693657396549	16.2018257831441	14.4611666996009	14.6709999130318	15.6526714634516	15.9636515482296	15.1683092908721	16.0155067443618	15.2391250899998	14.23471	15.53807	26	PRC1	>sp|O43663|PRC1_HUMAN Protein regulator of cytokinesis 1 OS=Homo sapiens GN=PRC1 PE=1 SV=2	-1.30336	14.8863890637689	3.73362568483634	0.00159462801823402	0.0778934237952257	-1.03748809385313	9	9	+	-	+
>tr|C9J634|C9J634_HUMAN Pyruvate dehydrogenase E1 component subunit beta, mitochondrial OS=Homo sapiens GN=PDHB PE=1 SV=1	16.6373064227976	16.7370443181626	17.332400323611	16.9214285481864	16.0658451942546	16.3055905371444	16.0161402169744	16.5155465155147	15.973609237045	15.135163198217	15.8118352851206	16.4824646477058	15.1015696810199	12.3464850201743	12.6955218954773	15.3080624225802	15.0156334108003	14.9351367930825	16.50055	14.7591	15	PDHB	>tr|C9J634|C9J634_HUMAN Pyruvate dehydrogenase E1 component subunit beta, mitochondrial OS=Homo sapiens GN=PDHB PE=1 SV=1	1.74145	15.6298213148816	-3.73296382444457	0.00159694679523564	0.0778934237952257	-1.03881202015642	9	9	-	-	+
>tr|A0A0G2JSE9|A0A0G2JSE9_HUMAN SWI/SNF-related matrix-associated actin-dependent regulator of chromatin subfamily B member 1 (Fragment) OS=Homo sapiens GN=SMARCB1 PE=1 SV=1	16.511254713581	16.5209792060626	16.3151176289818	16.6041448636033	16.5570385994763	16.4159643072946	16.3257746844276	16.7911513515895	16.735141436385	16.6233902068313	16.5231615820594	16.5526340984372	17.5376298949277	17.9576498320197	18.1228605847786	18.2113968031211	17.5428897227139	17.7919804362957	16.53073	17.42929	13	SMARCB1	>tr|A0A0G2JSE9|A0A0G2JSE9_HUMAN SWI/SNF-related matrix-associated actin-dependent regulator of chromatin subfamily B member 1 (Fragment) OS=Homo sapiens GN=SMARCB1 PE=1 SV=1	-0.898558	16.9800088862548	3.73112542155483	0.00160340518310469	0.0778934237952257	-1.04248935596282	9	9	-	-	+
>tr|H0YEG8|H0YEG8_HUMAN Nucleobindin-2 (Fragment) OS=Homo sapiens GN=NUCB2 PE=1 SV=2	17.6132813111612	17.8378033138611	17.6079575328047	18.9466898379378	18.4981403832647	18.3053509917463	17.7483379276654	14.2713301729752	15.3190234708974	12.6955218954773	15.969975752044	17.4161645447106	12.7215862908649	12.6955218954773	12.6955218954773	17.244868679863	14.4482653655956	12.6955218954773	17.34977	14.28699	8	NUCB2	>tr|H0YEG8|H0YEG8_HUMAN Nucleobindin-2 (Fragment) OS=Homo sapiens GN=NUCB2 PE=1 SV=2	3.06277	15.8183812865167	-3.70871885045657	0.00168424853676008	0.0810106870453514	-1.0873037522639	9	9	-	-	-
>sp|Q13283|G3BP1_HUMAN Ras GTPase-activating protein-binding protein 1 OS=Homo sapiens GN=G3BP1 PE=1 SV=1	22.3508527064282	22.3144352401823	22.0695719380035	22.0443353174884	22.0544524475088	22.0367215182431	22.2129440487371	22.0682608123831	22.0443353174884	22.329820064549	22.6259922145741	22.7283538450026	23.5201262724499	22.4666641598047	22.8154094433334	22.5743903405315	22.3955505171951	22.6193860845524	22.13288	22.67508	20	G3BP1	>sp|Q13283|G3BP1_HUMAN Ras GTPase-activating protein-binding protein 1 OS=Homo sapiens GN=G3BP1 PE=1 SV=1	-0.542198	22.4039779049142	3.70314481049497	0.00170498403550537	0.081204043573383	-1.09845051822641	9	9	+	-	+
>sp|O15121|DEGS1_HUMAN Sphingolipid delta(4)-desaturase DES1 OS=Homo sapiens GN=DEGS1 PE=1 SV=1	19.8196847825049	19.1673890823376	19.4395872495925	20.6232276499468	20.585611835094	20.4243072775522	18.3280844901779	17.757496851856	18.4939595576404	17.9334596997017	18.4535342091626	18.40429726041	18.5218438745595	18.37560640365	18.0282340988704	17.6035706859335	16.5882202923549	16.3484924010317	19.40437	17.80636	11	DEGS1	>sp|O15121|DEGS1_HUMAN Sphingolipid delta(4)-desaturase DES1 OS=Homo sapiens GN=DEGS1 PE=1 SV=1	1.59801	18.6053670945765	-3.68509731487129	0.00177388468630656	0.0836653573405559	-1.13453625237833	9	9	-	+	-
>sp|Q14692|BMS1_HUMAN Ribosome biogenesis protein BMS1 homolog OS=Homo sapiens GN=BMS1 PE=1 SV=1	16.3493311518208	16.6305530393708	16.2342612678963	16.2114200199223	17.5101254256677	16.4849207500582	16.86348424769	17.4486286011762	17.4680912046964	18.1633509447156	17.9608621200695	17.5740454136125	18.2373915916355	18.2392194652157	18.9748142781268	16.8787310191569	17.335679541988	17.188940186808	16.80009	17.83923	49	BMS1	>sp|Q14692|BMS1_HUMAN Ribosome biogenesis protein BMS1 homolog OS=Homo sapiens GN=BMS1 PE=1 SV=1	-1.03914	17.3196583483126	3.65627253272576	0.00188973562742416	0.0876126451709789	-1.19215313501106	9	9	-	-	+
>tr|F8W1V5|F8W1V5_HUMAN Plasma membrane calcium-transporting ATPase 1 (Fragment) OS=Homo sapiens GN=ATP2B1 PE=1 SV=1	16.8729203192629	18.0763273876695	18.0608233500724	18.9296026892596	18.8242443415711	18.943267803521	17.4807465915581	17.2304329582995	17.3711038287892	14.7438051527229	16.5242477554812	17.1386464577341	17.0314291481746	16.4693657396549	16.9726059490694	12.6955218954773	15.4902671650769	16.9449591584422	17.97661	16.00121	5	ATP2B1	>tr|F8W1V5|F8W1V5_HUMAN Plasma membrane calcium-transporting ATPase 1 (Fragment) OS=Homo sapiens GN=ATP2B1 PE=1 SV=1	1.9754	16.9889065384354	-3.64845423567843	0.00192243868700295	0.0876126451709789	-1.20777661404111	9	9	-	+	-
>sp|Q9NVX2|NLE1_HUMAN Notchless protein homolog 1 OS=Homo sapiens GN=NLE1 PE=1 SV=4	20.5967354744404	20.6379568524312	20.4505860902663	21.0954837194991	21.3424937620383	18.7725635876484	19.2626673132603	20.065461246628	20.0260190230982	18.8567539688162	18.6494772131673	19.3537982222867	18.7744503032037	20.4375632131228	17.9566944268315	18.935336336077	18.201662456638	19.2658909863858	20.25	18.93685	23	NLE1	>sp|Q9NVX2|NLE1_HUMAN Notchless protein homolog 1 OS=Homo sapiens GN=NLE1 PE=1 SV=4	1.31315	19.5934218997689	-3.64501708922859	0.00193699377976132	0.0876126451709789	-1.21464452165172	9	9	-	-	+
>tr|C9IYK2|C9IYK2_HUMAN Structural maintenance of chromosomes protein 4 (Fragment) OS=Homo sapiens GN=SMC4 PE=1 SV=1	18.377900376529	18.4803626321242	18.1840665959937	17.539738064977	16.9313151474446	17.600394864399	19.0297186231461	19.2734631068604	18.4685913169403	19.0138298295674	19.1253411466906	19.444204955795	19.204692958742	18.3190294473105	19.130598516205	20.2336901955865	19.8103845698965	19.6429302771091	18.20951	19.32497	9	SMC4	>tr|C9IYK2|C9IYK2_HUMAN Structural maintenance of chromosomes protein 4 (Fragment) OS=Homo sapiens GN=SMC4 PE=1 SV=1	-1.11546	18.7672362569621	3.63868022768632	0.00196411655314296	0.0876126451709789	-1.22730544846521	9	9	+	-	+
>tr|A0A0A0MT38|A0A0A0MT38_HUMAN Dedicator of cytokinesis 9, isoform CRA_b OS=Homo sapiens GN=DOCK9 PE=1 SV=2	17.521804460234	17.7495219615532	17.5394519550849	17.335679541988	18.2318102093516	17.5825401859628	18.015725965381	17.5380857577824	19.2652590033445	17.8442799091171	18.5011284274118	18.123588668953	19.2073680587512	19.637420528941	19.473106890975	19.1879476021525	19.1135188733238	19.0101886697407	17.86443	18.89984	67	DOCK9	>tr|A0A0A0MT38|A0A0A0MT38_HUMAN Dedicator of cytokinesis 9, isoform CRA_b OS=Homo sapiens GN=DOCK9 PE=1 SV=2	-1.03541	18.3821348150027	3.63297062557215	0.00198887841896329	0.0876126451709789	-1.23871195419038	9	9	-	+	-
>sp|Q14165|MLEC_HUMAN Malectin OS=Homo sapiens GN=MLEC PE=1 SV=1	20.3346398694445	20.3712904775241	20.5967354744404	21.0668655348871	21.2809535365195	20.7973924799357	19.9473649626996	20.0494486852671	19.8651172100661	19.4422035371752	19.9197059982491	19.1448138035301	18.1431126435169	19.5301116187154	18.5674544443065	20.0147918346262	20.3365513214777	19.7697072782643	20.47887	19.42983	14	MLEC	>sp|Q14165|MLEC_HUMAN Malectin OS=Homo sapiens GN=MLEC PE=1 SV=1	1.04904	19.9543478172581	-3.62839607998316	0.0020089418500019	0.0876126451709789	-1.24785004850107	9	9	-	+	-
>tr|J3KTD3|J3KTD3_HUMAN 60S ribosomal protein L36 (Fragment) OS=Homo sapiens GN=RPL36 PE=1 SV=1	23.4530175579185	24.0282429074578	23.8307835117244	23.1429181595849	23.0425812475895	23.1079473102306	23.7753899378787	23.6156067186827	23.8952216820862	24.2944806781137	24.2141174251039	23.6850249616069	23.9485633390276	24.2034436726359	24.4984121718257	24.193819212727	24.3988966513378	23.9096469100308	23.54352	24.1496	4	RPL36	>tr|J3KTD3|J3KTD3_HUMAN 60S ribosomal protein L36 (Fragment) OS=Homo sapiens GN=RPL36 PE=1 SV=1	-0.606077	23.8465618919757	3.61910950691059	0.00205029370952517	0.0876126451709789	-1.26639854377009	9	9	+	+	-
>sp|P16615|AT2A2_HUMAN Sarcoplasmic/endoplasmic reticulum calcium ATPase 2 OS=Homo sapiens GN=ATP2A2 PE=1 SV=1	20.8229556446393	20.2928881601804	20.7254289530774	21.2267196438446	21.4350502839657	21.1060297885367	20.0027437571149	20.2266982204547	19.9510626722287	19.9497440971721	20.3055948635856	19.117372536631	19.5645297002144	20.1713105775102	20.0741602644339	18.8659182804357	19.8297498013494	19.8347620750748	20.64329	19.7459	48	ATP2A2	>sp|P16615|AT2A2_HUMAN Sarcoplasmic/endoplasmic reticulum calcium ATPase 2 OS=Homo sapiens GN=ATP2A2 PE=1 SV=1	0.897382	20.1945955178028	-3.61576732744478	0.00206538246690098	0.0876126451709789	-1.27307324630835	9	9	-	+	-
>tr|Q5SY38|Q5SY38_HUMAN Eukaryotic translation initiation factor 2D (Fragment) OS=Homo sapiens GN=EIF2D PE=1 SV=6	13.0770136603663	15.5036986962755	14.1304278702192	12.6955218954773	14.2582174080046	14.4710897524473	15.5807699667856	15.0717064200272	14.9974890382221	15.1922959620728	15.4982493842915	16.3615570155675	15.7746762451394	14.8669286913891	16.1174069097261	17.7478435280141	16.7738150791887	15.6385035662769	14.42066	15.99681	13	EIF2D	>tr|Q5SY38|Q5SY38_HUMAN Eukaryotic translation initiation factor 2D (Fragment) OS=Homo sapiens GN=EIF2D PE=1 SV=6	-1.57615	15.2087339494162	3.61522926770306	0.00206782192632888	0.0876126451709789	-1.27414777155972	9	9	+	-	+
>tr|A0A0A0MRW6|A0A0A0MRW6_HUMAN Nucleolar protein 6 OS=Homo sapiens GN=NOL6 PE=1 SV=1	16.820236695785	17.0271374340561	16.9214285481864	15.6857680690332	16.8753136844433	15.8972343495365	17.2114088596012	17.3743872035828	17.8648068207518	18.1254074547517	18.2561507322155	16.9183181081258	19.3426644373871	19.9221107193851	19.6154777814225	17.7230935091623	17.5206559108564	17.5746199663846	16.85308	18.33317	39	NOL6	>tr|A0A0A0MRW6|A0A0A0MRW6_HUMAN Nucleolar protein 6 OS=Homo sapiens GN=NOL6 PE=1 SV=1	-1.48009	17.5931233491482	3.61434495784428	0.00207183744984371	0.0876126451709789	-1.27591374706718	9	9	-	-	+
>tr|A0A087X1R3|A0A087X1R3_HUMAN Ankyrin repeat domain-containing protein 36B OS=Homo sapiens GN=ANKRD36B PE=4 SV=1	15.753516417882	16.1823166165402	15.8386854127721	14.589260973443	14.7401105152109	14.7621166504824	14.4943046076173	13.8409081320283	13.7975461101407	11.0914988691372	12.8936289354664	14.6274833207174	12.503688017977	12.436302418177	15.2305693194009	13.2247497515021	13.1462598627981	13.1855438075841	14.88875	13.14886	53	ANKRD36B	>tr|A0A087X1R3|A0A087X1R3_HUMAN Ankyrin repeat domain-containing protein 36B OS=Homo sapiens GN=ANKRD36B PE=4 SV=1	1.73989	14.0188049854932	-3.61023047547842	0.00209062303926041	0.0876126451709789	-1.28413001199309	9	9	-	-	-
>sp|P19474|RO52_HUMAN E3 ubiquitin-protein ligase TRIM21 OS=Homo sapiens GN=TRIM21 PE=1 SV=1	15.1537893368317	13.2247497515021	12.690996670966	16.0404699906192	15.6358886222467	15.9782918056197	13.9372656156725	13.833718945558	13.5646799540481	11.7967498348415	11.3189862147536	12.161748051203	12.7215862908649	12.6955218954773	12.6955218954773	13.8991556299603	13.208858894295	13.6127461702991	14.45109	12.67899	22	TRIM21	>sp|P19474|RO52_HUMAN E3 ubiquitin-protein ligase TRIM21 OS=Homo sapiens GN=TRIM21 PE=1 SV=1	1.77211	13.5650403094576	-3.60992395807846	0.00209202927999628	0.0876126451709789	-1.28474207432348	9	9	+	-	+
>sp|Q9Y5Z9|UBIA1_HUMAN UbiA prenyltransferase domain-containing protein 1 OS=Homo sapiens GN=UBIAD1 PE=1 SV=1	15.4150364698154	17.5795844549713	15.8427699691491	16.0236261488282	17.6904937340095	15.96214017787	17.2841385477052	15.9539944331002	17.1531790787767	18.5768573278996	18.5674544443065	17.0056725333454	18.4800251877856	17.548726700992	18.8161850896308	16.5913803844869	17.6567713530974	18.0252449345404	16.545	17.9187	12	UBIAD1	>sp|Q9Y5Z9|UBIA1_HUMAN UbiA prenyltransferase domain-containing protein 1 OS=Homo sapiens GN=UBIAD1 PE=1 SV=1	-1.37371	17.231848942795	3.605658204188	0.00211169771261635	0.0876126451709789	-1.29325966373074	9	9	+	+	+
>tr|A0A087X1E5|A0A087X1E5_HUMAN Ragulator complex protein LAMTOR4 OS=Homo sapiens GN=LAMTOR4 PE=1 SV=1	18.7256881926532	19.6076633699789	17.0592206662206	17.9238797931169	18.4794241503212	18.1225023400884	18.5148724179392	18.1204591968807	16.8839555534646	19.8825971133073	20.1846032392762	19.9272195981825	17.9203356449818	18.7403825139834	20.5944077037177	20.0668211372975	19.9698603127832	18.8719537747528	18.15974	19.57313	2	LAMTOR4	>tr|A0A087X1E5|A0A087X1E5_HUMAN Ragulator complex protein LAMTOR4 OS=Homo sapiens GN=LAMTOR4 PE=1 SV=1	-1.41339	18.8664359288303	3.60338149857753	0.00212227030303269	0.0876126451709789	-1.29780534961201	9	9	-	-	-
>sp|Q9BW60|ELOV1_HUMAN Elongation of very long chain fatty acids protein 1 OS=Homo sapiens GN=ELOVL1 PE=1 SV=1	12.6955218954773	12.982730288032	12.6955218954773	12.6955218954773	12.6955218954773	12.6955218954773	12.6955218954773	12.6955218954773	13.5593541045285	15.6341196457094	15.7164450896632	12.6955218954773	17.7218127868457	16.9086386030311	17.1172125453199	12.6955218954773	13.1618884498392	14.4122681347373	12.82342	15.11816	10	ELOVL1	>sp|Q9BW60|ELOV1_HUMAN Elongation of very long chain fatty acids protein 1 OS=Homo sapiens GN=ELOVL1 PE=1 SV=1	-2.29474	13.9707870392779	3.59646206338495	0.00215472726286601	0.0876126451709789	-1.31161944665019	9	9	-	+	-
>tr|M0R055|M0R055_HUMAN ELAV-like protein 1 (Fragment) OS=Homo sapiens GN=ELAVL1 PE=1 SV=1	19.3987122726098	20.2857218335161	20.6270415299305	20.0695954172001	20.5454351387074	20.2731809749256	20.7778884734105	20.449202220509	20.7272533201878	21.2227228917124	20.8914516645416	20.9922222306133	21.065860371001	21.0725633766875	20.9226821751952	20.7842915885993	20.6412183498159	21.0353205851341	20.35045	20.9587	8	ELAVL1	>tr|M0R055|M0R055_HUMAN ELAV-like protein 1 (Fragment) OS=Homo sapiens GN=ELAVL1 PE=1 SV=1	-0.608256	20.6545758007943	3.59560736719104	0.00215877050119425	0.0876126451709789	-1.31332564182486	9	9	+	+	+
>sp|Q9Y3E0|GOT1B_HUMAN Vesicle transport protein GOT1B OS=Homo sapiens GN=GOLT1B PE=1 SV=1	19.9331590476635	21.0198472815463	20.213899649393	19.1593616128465	19.2215943193571	20.8545264409163	18.0332346603374	17.9498477919734	18.252397148744	18.661654633812	17.8008669587059	19.5006415273408	17.0056725333454	16.7299218649716	15.3303563140744	17.6837314053796	16.3957796111523	17.6877287630086	19.40421	17.42182	7	GOLT1B	>sp|Q9Y3E0|GOT1B_HUMAN Vesicle transport protein GOT1B OS=Homo sapiens GN=GOLT1B PE=1 SV=1	1.98239	18.4130123091427	-3.5941865073502	0.00216550875329737	0.0876126451709789	-1.31616197875007	9	9	-	+	-
>tr|Q6NXR6|Q6NXR6_HUMAN Histone-lysine N-methyltransferase setd3 OS=Homo sapiens GN=SETD3 PE=1 SV=1	13.8803475012367	14.0572423110404	14.3622581291601	13.8706486594702	12.5993400068441	14.1832845682598	14.929966398923	14.7612457385326	14.174747263714	15.0292477228393	15.3792839531958	14.7800887752744	15.1946734978976	15.0740728090983	14.4833114625529	15.094254496682	14.9351367930825	14.7519645670175	14.09101	14.96911	18	SETD3	>tr|Q6NXR6|Q6NXR6_HUMAN Histone-lysine N-methyltransferase setd3 OS=Homo sapiens GN=SETD3 PE=1 SV=1	-0.878106	14.5300619252678	3.58910087962307	0.00218979864609537	0.0876126451709789	-1.32631326800773	9	9	-	-	-
>tr|Q5TCC6|Q5TCC6_HUMAN Isoleucine--tRNA ligase, cytoplasmic OS=Homo sapiens GN=IARS PE=1 SV=1	19.8563292147555	20.290621801672	20.1626550281613	20.275673927338	19.5621373273682	19.3748786771395	20.5428210002565	20.7180054383437	20.2636736411934	20.7774411243087	20.1440781394653	20.5467876655001	20.9768839632532	20.9312813226225	20.6118914850562	21.2652474614193	20.9883427788358	21.2310585781492	20.11631	20.83033	6	IARS	>tr|Q5TCC6|Q5TCC6_HUMAN Isoleucine--tRNA ligase, cytoplasmic OS=Homo sapiens GN=IARS PE=1 SV=1	-0.714024	20.4733226986021	3.58040030686045	0.00223198423202222	0.0876126451709789	-1.34367766196029	9	9	+	+	-
>tr|Q5JXR6|Q5JXR6_HUMAN NFX1-type zinc finger-containing protein 1 OS=Homo sapiens GN=ZNFX1 PE=1 SV=1	13.939244432418	14.5942525718774	12.9381842293205	14.7800887752744	13.8750683402448	14.0726525536326	14.3171112154447	14.4810928133966	14.5281168170735	15.5036986962755	15.3771641485285	15.1334010742446	16.1480788684819	14.2292975727909	14.2265817642207	15.3976366031267	14.9613248643049	15.5901408437907	14.16953	15.17415	58	ZNFX1	>tr|Q5JXR6|Q5JXR6_HUMAN NFX1-type zinc finger-containing protein 1 OS=Homo sapiens GN=ZNFX1 PE=1 SV=1	-1.00461	14.6718408991359	3.57607792506485	0.00225324124508888	0.0876126451709789	-1.35230291936183	9	9	-	-	-
>sp|O00443|P3C2A_HUMAN Phosphatidylinositol 4-phosphate 3-kinase C2 domain-containing subunit alpha OS=Homo sapiens GN=PIK3C2A PE=1 SV=2	18.1778579452197	17.9253622984582	17.9545664314295	17.6313089323492	17.4481058993011	17.6712254868799	18.0581832481126	17.862595522866	17.6224102139663	17.405241055412	17.2170797826522	16.99442555221	17.9487768420901	17.4612580849445	17.0960654646347	17.0999898313927	17.3349936951685	17.0182944506645	17.81685	17.28624	86	PIK3C2A	>sp|O00443|P3C2A_HUMAN Phosphatidylinositol 4-phosphate 3-kinase C2 domain-containing subunit alpha OS=Homo sapiens GN=PIK3C2A PE=1 SV=2	0.53061	17.5515411520973	-3.57092828976496	0.00227882952725044	0.0876126451709789	-1.36257784146522	9	9	+	+	+
>sp|Q9Y4I1|MYO5A_HUMAN Unconventional myosin-Va OS=Homo sapiens GN=MYO5A PE=1 SV=2	16.0824681570652	15.8564733751451	15.9892196340406	17.0743301472092	17.2625790451542	17.2437808424396	15.5133883756075	16.081157689193	15.8710320763872	15.1389264233576	15.0284476750502	16.0631197848386	15.4649121113376	15.6909336270371	15.6990861699199	15.1437602461677	15.4100268531522	14.3098086756794	16.33049	15.32767	95	MYO5A	>sp|Q9Y4I1|MYO5A_HUMAN Unconventional myosin-Va OS=Homo sapiens GN=MYO5A PE=1 SV=2	1.00282	15.8290806060434	-3.56787996033103	0.00229411243535986	0.0876126451709789	-1.36865950933376	9	9	+	+	-
>sp|P00749|UROK_HUMAN Urokinase-type plasminogen activator OS=Homo sapiens GN=PLAU PE=1 SV=2	15.0443502566859	17.0033814526736	16.5483820288628	17.6346524015548	18.5507005464898	18.3492187522853	14.1645218959134	16.6778516425157	15.8571661856108	14.4097849519235	12.784590562565	14.3343988108954	15.8253102706343	14.9709178989849	15.9617684746727	15.0795920970665	14.2127025464798	14.1154775435312	16.6478	14.63273	24	PLAU	>sp|P00749|UROK_HUMAN Urokinase-type plasminogen activator OS=Homo sapiens GN=PLAU PE=1 SV=2	2.01508	15.6402649066303	-3.5643954674969	0.00231170689956084	0.0876126451709789	-1.37561082438257	9	9	-	-	-
>sp|P48723|HSP13_HUMAN Heat shock 70 kDa protein 13 OS=Homo sapiens GN=HSPA13 PE=1 SV=1	16.127659434469	16.0886632179499	15.8598228619034	15.2236127327373	15.783541231434	16.2898999688336	14.7800887752744	15.4289639724646	14.9117895649502	13.9636451233101	13.8159894780761	15.2880820640601	16.2312885245348	12.6955218954773	14.8399794469284	14.0202086432254	12.541984929259	13.1212327798637	15.61045	14.05755	21	HSPA13	>sp|P48723|HSP13_HUMAN Heat shock 70 kDa protein 13 OS=Homo sapiens GN=HSPA13 PE=1 SV=1	1.5529	14.8339985913751	-3.55935211093636	0.00233741044400375	0.0876126451709789	-1.38567093585426	9	9	-	-	-
>tr|A0A087WZ11|A0A087WZ11_HUMAN Putative ATP-dependent RNA helicase DHX57 OS=Homo sapiens GN=DHX57 PE=1 SV=1	17.6965869927436	16.4563913194076	17.3638315563585	16.3125462358185	15.9851327304822	16.0986749337371	16.6726392930222	16.7964228472032	17.2252103931602	17.0535948104599	17.4340557328793	16.7523569724355	18.5663112103915	17.6171375418489	18.0457995967125	17.998445642258	17.9833253280564	17.8771217286818	16.73416	17.70313	24	DHX57	>tr|A0A087WZ11|A0A087WZ11_HUMAN Putative ATP-dependent RNA helicase DHX57 OS=Homo sapiens GN=DHX57 PE=1 SV=1	-0.968968	17.2186436036476	3.55702868707468	0.00234934718507164	0.0876126451709789	-1.39030511447474	9	9	-	-	-
>sp|Q16651|PRSS8_HUMAN Prostasin OS=Homo sapiens GN=PRSS8 PE=1 SV=1	12.6955218954773	12.6955218954773	12.6955218954773	12.6955218954773	12.6955218954773	13.8351117805099	12.6955218954773	12.6955218954773	12.6955218954773	16.5414165414957	12.6955218954773	12.6955218954773	16.1271143420781	16.9190209177135	15.9970957965093	15.2153976269046	14.8712464410896	12.6955218954773	12.82214	14.86198	10	PRSS8	>sp|Q16651|PRSS8_HUMAN Prostasin OS=Homo sapiens GN=PRSS8 PE=1 SV=1	-2.03984	13.8420635720306	3.55123194095783	0.00237939310226174	0.0876126451709789	-1.4018658404792	9	9	-	-	-
>sp|Q9BXB5|OSB10_HUMAN Oxysterol-binding protein-related protein 10 OS=Homo sapiens GN=OSBPL10 PE=1 SV=2	14.4710897524473	12.7267339874944	12.8610294295386	14.440725512633	14.1036533302156	13.8009601369718	13.218773329393	12.6955218954773	12.5739233393347	12.6955218954773	11.4713079460526	11.942040610389	12.7215862908649	11.6139689121823	12.6955218954773	12.6955218954773	12.4843460934607	12.6955218954773	13.43249	12.33504	36	OSBPL10	>sp|Q9BXB5|OSB10_HUMAN Oxysterol-binding protein-related protein 10 OS=Homo sapiens GN=OSBPL10 PE=1 SV=2	1.09745	12.8837637860202	-3.5466738384941	0.00240328671619915	0.0876126451709789	-1.41095510082431	9	9	-	-	-
>tr|E9PCN5|E9PCN5_HUMAN CCR4-NOT transcription complex subunit 10 OS=Homo sapiens GN=CNOT10 PE=1 SV=1	16.6877168361255	16.2863629952018	16.6039432017084	16.6902796854627	16.3552863195247	16.6344281431564	16.6436447981693	15.6986368369619	15.9706363700369	17.1829622443303	17.0550662632851	16.6388359934214	16.6825931659558	17.3495093294445	17.1210573837973	18.0068404681957	17.0956479341743	16.6971190592101	16.39677	17.09218	30	CNOT10	>tr|E9PCN5|E9PCN5_HUMAN CCR4-NOT transcription complex subunit 10 OS=Homo sapiens GN=CNOT10 PE=1 SV=1	-0.695411	16.744475946009	3.54411710366506	0.00241679333899078	0.0876126451709789	-1.41605299460461	9	9	-	+	+
>tr|H0Y5R6|H0Y5R6_HUMAN Uroporphyrinogen decarboxylase (Fragment) OS=Homo sapiens GN=UROD PE=1 SV=1	16.0108092411415	15.3277097054567	14.929966398923	14.856020050689	12.6955218954773	12.6955218954773	12.6955218954773	12.6955218954773	12.6955218954773	16.8141485248901	15.8148774016876	16.3013179196846	16.9065810083335	16.5168162815743	16.4733619240351	14.7530204663188	14.2951250971406	14.5794798414323	13.84468	15.8283	10	UROD	>tr|H0Y5R6|H0Y5R6_HUMAN Uroporphyrinogen decarboxylase (Fragment) OS=Homo sapiens GN=UROD PE=1 SV=1	-1.98362	14.8364912965941	3.54291549183389	0.00242316719002008	0.0876126451709789	-1.41844878202496	9	9	-	-	-
>tr|D6RGD1|D6RGD1_HUMAN Unconventional myosin-X (Fragment) OS=Homo sapiens GN=MYO10 PE=1 SV=1	17.1698032822743	17.3285346890682	17.4030671988365	16.8228144450523	17.0672759658571	16.9369017096829	16.0686351438627	16.7523569724355	16.7466433044338	16.1879846794563	16.0635166538835	17.2515582206775	16.5085574599769	15.3428408115122	16.0327231337116	15.8066017507008	15.8507936166444	15.9802191814515	16.92178	16.11387	42	MYO10	>tr|D6RGD1|D6RGD1_HUMAN Unconventional myosin-X (Fragment) OS=Homo sapiens GN=MYO10 PE=1 SV=1	0.807915	16.5178237899732	-3.54168425261223	0.00242971551769591	0.0876126451709789	-1.42090356352582	9	9	+	-	-
>sp|P34932|HSP74_HUMAN Heat shock 70 kDa protein 4 OS=Homo sapiens GN=HSPA4 PE=1 SV=4	18.8170617227421	19.389434235897	19.1889845520601	19.40102985868	18.8846861554428	18.8963937236083	19.7285881954817	19.2867784321771	19.4842060158564	19.5621373273682	20.3633988580735	19.1036198629092	20.3266335466494	19.571312615396	20.4293976215684	20.0681969855729	19.9742802084401	19.8119478472074	19.2308	19.91232	42	HSPA4	>sp|P34932|HSP74_HUMAN Heat shock 70 kDa protein 4 OS=Homo sapiens GN=HSPA4 PE=1 SV=4	-0.681529	19.5715604313961	3.53798694255953	0.00244948543511277	0.0876126451709789	-1.4282745962653	9	9	-	-	-
>tr|C9JLN7|C9JLN7_HUMAN Mediator of RNA polymerase II transcription subunit 15 (Fragment) OS=Homo sapiens GN=MED15 PE=1 SV=6	15.4583327209158	17.558718196211	17.0413653113222	16.2919347718706	17.8472426916132	17.875399217422	17.8555189151189	17.2252103931602	16.9925645255597	19.1797364204306	20.4505860902663	17.4704677956985	18.3226912936655	19.8157899460055	19.4091296739001	17.836106924817	18.1389294735736	17.4920561848759	17.12737	18.6795	4	MED15	>tr|C9JLN7|C9JLN7_HUMAN Mediator of RNA polymerase II transcription subunit 15 (Fragment) OS=Homo sapiens GN=MED15 PE=1 SV=6	-1.55213	17.9034322525793	3.53786544044286	0.00245013782446756	0.0876126451709789	-1.42851681321792	9	9	+	+	+
>tr|B4E2E0|B4E2E0_HUMAN Cytoplasmic dynein 1 light intermediate chain 2 OS=Homo sapiens GN=DYNC1LI2 PE=1 SV=1	16.7651792208623	16.9625981973579	17.4075223260568	18.7896977515631	18.152867694453	19.0639881239186	17.2481819274634	17.6510992230956	18.0988935826016	16.8482388797123	15.6905753162427	17.3523836984697	16.2018257831441	17.4497577380345	16.6503189663643	16.5429678971954	16.5309987426105	16.7466433044338	17.79334	16.66819	11	DYNC1LI2	>tr|B4E2E0|B4E2E0_HUMAN Cytoplasmic dynein 1 light intermediate chain 2 OS=Homo sapiens GN=DYNC1LI2 PE=1 SV=1	1.12515	17.2307632429766	-3.53738461758075	0.00245272123162889	0.0876126451709789	-1.42947533579929	9	9	-	+	-
>tr|E9PQC9|E9PQC9_HUMAN Elongation factor 1-delta (Fragment) OS=Homo sapiens GN=EEF1D PE=1 SV=1	21.80389948149	22.6962959290552	23.3138336080961	22.4189059203192	22.437788949468	22.4016424846954	22.7015200352301	22.9162859558967	22.7186295457653	23.2502869848337	22.611630736989	23.6445304884811	23.0822185024766	23.0383428899842	23.0352638039874	24.0520322073125	23.9602967095441	24.0646035088697	22.60098	23.41547	3	EEF1D	>tr|E9PQC9|E9PQC9_HUMAN Elongation factor 1-delta (Fragment) OS=Homo sapiens GN=EEF1D PE=1 SV=1	-0.814489	23.0082226523608	3.52545119786164	0.00251771200675665	0.0892777002103929	-1.45326070575937	9	9	+	-	+
>tr|E5RH09|E5RH09_HUMAN Arginine--tRNA ligase, cytoplasmic OS=Homo sapiens GN=RARS PE=1 SV=1	19.8347620750748	21.3875488534507	21.0709011749085	19.7991473177865	19.5350408352922	20.135352960696	21.2929939097783	21.4075867772744	21.2734592498612	21.2096195368625	22.0888866318354	22.2763984241744	21.5217210079639	21.1703476029639	21.1145730565267	21.9684079389478	21.8941912023995	22.0955347804698	20.63742	21.70441	7	RARS	>tr|E5RH09|E5RH09_HUMAN Arginine--tRNA ligase, cytoplasmic OS=Homo sapiens GN=RARS PE=1 SV=1	-1.06699	21.1709151853481	3.52089049244896	0.00254299924000385	0.0894638288801013	-1.46234893070693	9	9	+	+	+
>sp|Q9UHQ4|BAP29_HUMAN B-cell receptor-associated protein 29 OS=Homo sapiens GN=BCAP29 PE=1 SV=2	19.5874441579105	20.6609575653117	20.5799159560359	20.320496921484	19.9632557801491	20.0938524043995	19.9396245948916	20.0102676598018	20.0471622709817	20.1831964079564	18.6409739695201	18.7667653446199	20.1482214733188	18.8181583660559	19.5438340231091	18.8261542731702	19.3958782284081	19.512187625042	20.13366	19.31504	14	BCAP29	>sp|Q9UHQ4|BAP29_HUMAN B-cell receptor-associated protein 29 OS=Homo sapiens GN=BCAP29 PE=1 SV=2	0.818623	19.7243526123426	-3.51601428388529	0.00257031472618181	0.0894638288801013	-1.47206458081467	9	9	-	+	-
>tr|A0A087X054|A0A087X054_HUMAN Hypoxia up-regulated protein 1 OS=Homo sapiens GN=HYOU1 PE=1 SV=1	20.5530783055967	21.5217210079639	20.5488225851338	21.6746870028558	21.6075097003346	21.3317583787028	20.432617445577	20.4760472120387	20.840141156701	20.2364457309475	20.0191200353301	19.7985310350723	19.7831823734493	20.3314195297782	20.1335455326951	20.3626547362027	20.9650470480496	20.3728848918845	20.99849	20.22254	45	HYOU1	>tr|A0A087X054|A0A087X054_HUMAN Hypoxia up-regulated protein 1 OS=Homo sapiens GN=HYOU1 PE=1 SV=1	0.77595	20.6105118726841	-3.51461473943756	0.00257820832507496	0.0894638288801013	-1.47485286863372	9	9	-	+	-
>sp|Q15125|EBP_HUMAN 3-beta-hydroxysteroid-Delta(8),Delta(7)-isomerase OS=Homo sapiens GN=EBP PE=1 SV=3	20.5810341393799	19.2915882526762	19.6006360095002	20.3164204940275	20.4347747053443	20.9497248556586	18.1011121555106	19.1575749104418	19.1669025058897	18.751798956609	19.1501064364264	19.1884386281966	15.60493269132	18.277938366441	15.8875054248074	18.4437634819466	17.9970602816512	18.1087993377221	19.73331	17.93448	8	EBP	>sp|Q15125|EBP_HUMAN 3-beta-hydroxysteroid-Delta(8),Delta(7)-isomerase OS=Homo sapiens GN=EBP PE=1 SV=3	1.79882	18.8338950907527	-3.48634505822675	0.00274290317873305	0.0942407111490769	-1.53114940356819	9	9	-	-	-
>sp|Q9HBH0|RHOF_HUMAN Rho-related GTP-binding protein RhoF OS=Homo sapiens GN=RHOF PE=1 SV=1	18.0725780910374	18.2696681530674	18.0350411221449	18.3651324668837	18.7074944449456	18.46597224533	17.7184770277622	17.1979203797017	17.7549757921238	16.4453061945453	17.277551501967	18.2080580482098	17.163947415646	17.4585485554044	17.5815578519275	17.0068910829667	17.1873988081761	17.1467957800248	18.06525	17.27512	11	RHOF	>sp|Q9HBH0|RHOF_HUMAN Rho-related GTP-binding protein RhoF OS=Homo sapiens GN=RHOF PE=1 SV=1	0.790134	17.670184164548	-3.48439042090205	0.00275466879027767	0.0942407111490769	-1.535040091375	9	9	-	+	-
>tr|Q5TEJ7|Q5TEJ7_HUMAN Replication protein A 32 kDa subunit (Fragment) OS=Homo sapiens GN=RPA2 PE=1 SV=1	18.2173753249753	18.234582883025	17.8896505045046	18.156224150041	17.9814175792327	17.9636943510351	18.6531882776771	18.430795474136	18.5537476733325	15.0325444116622	17.7366479011066	17.9062626680979	17.1264625716027	12.6955218954773	16.1355689163578	16.4110288637193	16.4700714344253	17.6384398729092	18.23119	16.35028	7	RPA2	>tr|Q5TEJ7|Q5TEJ7_HUMAN Replication protein A 32 kDa subunit (Fragment) OS=Homo sapiens GN=RPA2 PE=1 SV=1	1.8809	17.2907347085176	-3.47970003148075	0.00278310629319212	0.0945477648414497	-1.54437528523269	9	9	-	-	+
>tr|H7C577|H7C577_HUMAN Acetyl-coenzyme A transporter 1 (Fragment) OS=Homo sapiens GN=SLC33A1 PE=1 SV=1	18.6017179720848	18.6574639360421	18.4794241503212	18.3641008346839	18.2334832359184	18.3146908475985	17.377747467581	17.5407394255783	17.863881298633	18.1398700908255	17.7777898202913	18.1660973109166	17.1289009099539	17.0828996158508	16.7370443181626	16.7943500381323	16.8787310191569	16.3564948933828	18.15925	17.22913	10	SLC33A1	>tr|H7C577|H7C577_HUMAN Acetyl-coenzyme A transporter 1 (Fragment) OS=Homo sapiens GN=SLC33A1 PE=1 SV=1	0.930119	17.694190399173	-3.47515391984992	0.00281094673339318	0.094830411325167	-1.55342198516688	9	9	-	+	-
>sp|Q8WTT2|NOC3L_HUMAN Nucleolar complex protein 3 homolog OS=Homo sapiens GN=NOC3L PE=1 SV=1	19.9188486795214	17.8462610559194	20.22723635619	18.7074944449456	19.1099234510719	18.9654932841523	19.2295012177849	19.1273453287882	18.3681225069094	17.7699886651469	17.7305688408477	17.6006504201362	16.7151362251563	17.0289144309983	17.0389405330152	19.1639481447591	18.8659182804357	18.2392194652157	19.05558	17.79481	35	NOC3L	>sp|Q8WTT2|NOC3L_HUMAN Nucleolar complex protein 3 homolog OS=Homo sapiens GN=NOC3L PE=1 SV=1	1.26077	18.4251950739441	-3.4667262702409	0.00286328989858076	0.0956232345311772	-1.57018933836147	9	9	-	-	-
>tr|H0Y7Q2|H0Y7Q2_HUMAN Syndetin (Fragment) OS=Homo sapiens GN=VPS50 PE=1 SV=1	16.5779260862133	16.2105369672137	16.3779619786742	16.6136626495041	16.5560041521389	16.2213276767463	16.4265106501389	16.7309944233728	16.8845307312821	15.8780106750706	16.0579853147841	16.6094572155649	15.5499884780947	15.5957512008743	15.5408892044643	16.1919724530018	16.3289062650489	15.2615154290561	16.51105	15.8905	24	VPS50	>tr|H0Y7Q2|H0Y7Q2_HUMAN Syndetin (Fragment) OS=Homo sapiens GN=VPS50 PE=1 SV=1	0.620553	16.2007739750691	-3.46505013066058	0.00287381478829804	0.0956232345311772	-1.57352356761559	9	9	-	-	-
>tr|H3BPE3|H3BPE3_HUMAN Eukaryotic translation initiation factor 3 subunit C (Fragment) OS=Homo sapiens GN=EIF3C PE=1 SV=6	21.1911980464691	18.7231858963525	19.0071846610241	18.2580854138273	18.7174292218862	18.7923585036285	19.4752846975169	21.7905967487779	22.0708870716209	17.9515565965525	18.2892579801781	18.0124733022547	17.1926881419023	17.9425129833564	16.044374601133	17.4384648765417	18.9516299084948	18.8573722323704	19.78069	17.85337	5	EIF3C	>tr|H3BPE3|H3BPE3_HUMAN Eukaryotic translation initiation factor 3 subunit C (Fragment) OS=Homo sapiens GN=EIF3C PE=1 SV=6	1.92732	18.8170300491048	-3.45446672030989	0.00294116134410542	0.0966689516756748	-1.59457204910407	9	9	-	-	-
>tr|D6RHW1|D6RHW1_HUMAN Adenylate kinase isoenzyme 6 (Fragment) OS=Homo sapiens GN=TAF9 PE=1 SV=3	15.1517207813769	14.0264984831901	13.3065473156342	12.6955218954773	12.6955218954773	12.6955218954773	16.4227926426397	16.2623861722358	16.5719796988585	14.4041083544713	15.6353122593339	16.0962926546271	18.0341639925794	17.6367564296792	16.8942083768305	16.976365754605	17.0378570215399	17.4893518571622	14.42539	16.68938	7	TAF9	>tr|D6RHW1|D6RHW1_HUMAN Adenylate kinase isoenzyme 6 (Fragment) OS=Homo sapiens GN=TAF9 PE=1 SV=3	-2.26399	15.5573837489553	3.45149730762644	0.00296033619074507	0.0966689516756748	-1.60047629617465	9	9	-	-	-
>sp|Q7Z7A4|PXK_HUMAN PX domain-containing protein kinase-like protein OS=Homo sapiens GN=PXK PE=1 SV=1	16.2102936127532	17.1701684804243	16.8183370302014	17.4372367590404	17.5771382004471	17.3800586283226	17.4381987928519	17.242586761495	17.6273518814252	17.9648381718049	18.4174060514985	18.219243320392	16.8274587125012	18.5535040866921	17.7909125406446	18.0807325880408	17.8893890368868	18.4576612103432	17.21126	18.02235	22	PXK	>sp|Q7Z7A4|PXK_HUMAN PX domain-containing protein kinase-like protein OS=Homo sapiens GN=PXK PE=1 SV=1	-0.811086	17.616806436987	3.45078734857978	0.00296493902833996	0.0966689516756748	-1.60188785638863	9	9	+	-	+
>sp|Q8WVM7|STAG1_HUMAN Cohesin subunit SA-1 OS=Homo sapiens GN=STAG1 PE=1 SV=3	14.0373233196555	15.5187595214562	15.8833053220832	14.3935123506712	15.1162642551108	14.3947028936618	15.1517207813769	14.6290764000244	16.5706387786554	16.5337324720722	15.7897651727752	16.2812078236959	16.1676724674756	16.0320967680697	15.5246889692944	16.5888427256082	16.5609699475019	15.6136358874623	15.07726	16.1214	59	STAG1	>sp|Q8WVM7|STAG1_HUMAN Cohesin subunit SA-1 OS=Homo sapiens GN=STAG1 PE=1 SV=3	-1.04415	15.5993286587028	3.44515202496846	0.00300172648936301	0.0967170240922425	-1.61309091230596	9	9	-	-	+
>tr|A0A087X059|A0A087X059_HUMAN Probable ATP-dependent RNA helicase DDX27 (Fragment) OS=Homo sapiens GN=DDX27 PE=1 SV=1	17.4807465915581	19.0101886697407	19.1071997664276	18.0577742313799	18.3316727841143	17.8302576482345	18.3724473449824	17.90002865017	18.0294324837029	19.0852541175377	19.1234231810338	19.6426574059007	18.4616748613179	18.8420008618188	18.941976443734	19.0649700880343	18.8344986913227	18.8384052633212	18.23553	18.98165	14	DDX27	>tr|A0A087X059|A0A087X059_HUMAN Probable ATP-dependent RNA helicase DDX27 (Fragment) OS=Homo sapiens GN=DDX27 PE=1 SV=1	-0.746124	18.608589393574	3.44446668813226	0.00300623109055756	0.0967170240922425	-1.61445321340736	9	9	-	-	+
>tr|H3BNK8|H3BNK8_HUMAN M-phase phosphoprotein 6 OS=Homo sapiens GN=MPHOSPH6 PE=1 SV=1	12.6955218954773	12.6955218954773	14.757439590681	12.6955218954773	12.6955218954773	12.6955218954773	12.6955218954773	12.6955218954773	12.6955218954773	16.5038469450095	17.9642700043532	15.6409026561462	19.1918352032844	18.5075054904541	19.0146963035005	12.6955218954773	12.6955218954773	12.6955218954773	12.92462	16.10107	2	MPHOSPH6	>tr|H3BNK8|H3BNK8_HUMAN M-phase phosphoprotein 6 OS=Homo sapiens GN=MPHOSPH6 PE=1 SV=1	-3.17645	14.5128465024266	3.44055725834913	0.0030320553845206	0.0967308293435076	-1.62222367404362	9	9	+	-	+
>tr|K7EN03|K7EN03_HUMAN RelA-associated inhibitor (Fragment) OS=Homo sapiens GN=PPP1R13L PE=1 SV=1	17.3559368957704	17.3938661408124	17.5697103095182	18.7020266124818	18.4569374278777	18.4693411957405	18.2557962341519	17.633791467129	17.0146251921696	20.1964812284966	19.5294304021945	17.8140718869614	17.8119265069086	18.5639857009221	18.9322371446808	19.4362950971685	20.6902618844293	20.8422698682683	17.87245	19.313	7	PPP1R13L	>tr|K7EN03|K7EN03_HUMAN RelA-associated inhibitor (Fragment) OS=Homo sapiens GN=PPP1R13L PE=1 SV=1	-1.44055	18.5927217330934	3.43838737577807	0.0030464835095835	0.0967308293435076	-1.62653610403982	9	9	+	-	+
>tr|Q68DW7|Q68DW7_HUMAN Cohesin subunit SA-1 OS=Homo sapiens GN=DKFZp781D1416 PE=1 SV=1	14.3532957286016	15.8148774016876	16.2221431105768	14.6108332341683	15.3526780946249	14.6092263799205	15.4501617829758	14.9400928607104	16.8555734632843	16.8380337843169	16.1181681419749	16.611384462442	16.4168500760014	16.2830064810434	15.7824640927067	16.8858774155777	16.8839555534646	15.9276409739544	15.35654	16.41638	48	DKFZp781D1416	>tr|Q68DW7|Q68DW7_HUMAN Cohesin subunit SA-1 OS=Homo sapiens GN=DKFZp781D1416 PE=1 SV=1	-1.05983	15.8864590576684	3.43241439739637	0.00308655140559017	0.0973666670672536	-1.6384050564542	9	9	-	-	-
>tr|E9PNC0|E9PNC0_HUMAN DNA polymerase delta subunit 3 (Fragment) OS=Homo sapiens GN=POLD3 PE=1 SV=1	15.2728171985306	16.3684515921274	15.6683605612771	16.1018208617895	14.6447083365719	12.6955218954773	12.6955218954773	14.6529139862482	15.1205683755382	17.6058288578048	17.4256537367426	16.5353189844135	16.7291564178145	16.2510436110166	15.5617928277095	15.588197343872	16.1976457972814	16.3665585960454	14.8023	16.47347	8	POLD3	>tr|E9PNC0|E9PNC0_HUMAN DNA polymerase delta subunit 3 (Fragment) OS=Homo sapiens GN=POLD3 PE=1 SV=1	-1.67117	15.6378822708743	3.4206019673066	0.00316733336315405	0.0992703579238863	-1.66186988712632	9	9	-	-	+
>tr|E5RHV7|E5RHV7_HUMAN Catenin alpha-1 (Fragment) OS=Homo sapiens GN=CTNNA1 PE=1 SV=1	19.7130503283856	19.329737777262	19.1437244365823	19.4110410443069	19.4562480173664	19.1624766287646	19.8512049973484	20.1418577569684	20.2001567183696	19.3082926193118	20.1956930796733	21.3659895485083	21.6270767368966	21.8343269000976	22.0347394934259	20.1424865761679	20.0806572984217	20.3275330015998	19.60106	20.76853	5	CTNNA1	>tr|E5RHV7|E5RHV7_HUMAN Catenin alpha-1 (Fragment) OS=Homo sapiens GN=CTNNA1 PE=1 SV=1	-1.16748	20.1847940533032	3.41274808210418	0.00322219812437744	0.100041777026193	-1.6774654302503	9	9	-	-	-
>sp|O60870|KIN17_HUMAN DNA/RNA-binding protein KIN17 OS=Homo sapiens GN=KIN PE=1 SV=2	13.9079060122664	12.9162312991536	13.2653161391924	12.6955218954773	15.4326777654538	14.8576161615595	14.5293882897413	14.4381018484254	14.8682202432826	14.7680793534624	15.1025133942941	15.1579344648876	17.3840479656104	16.1271143420781	14.8669286913891	15.499010060359	15.5393156760719	15.0825506043773	14.10122	15.50305	20	KIN	>sp|O60870|KIN17_HUMAN DNA/RNA-binding protein KIN17 OS=Homo sapiens GN=KIN PE=1 SV=2	-1.40183	14.802137455949	3.4111986081217	0.00323313276926973	0.100041777026193	-1.68054167702987	9	9	+	-	+
>tr|E9PP85|E9PP85_HUMAN Protein-methionine sulfoxide oxidase MICAL3 OS=Homo sapiens GN=MICAL3 PE=1 SV=1	14.895063861292	15.4731349380232	16.7362797434349	15.8761183781724	15.4761810998379	15.306378618647	12.6955218954773	12.6955218954773	12.6955218954773	12.6955218954773	14.3171112154447	12.2917435993015	12.7215862908649	12.6955218954773	12.6955218954773	12.6955218954773	12.6955218954773	12.6955218954773	14.64997	12.83373	15	MICAL3	>tr|E9PP85|E9PP85_HUMAN Protein-methionine sulfoxide oxidase MICAL3 OS=Homo sapiens GN=MICAL3 PE=1 SV=1	1.81624	13.7418497113508	-3.40137597683894	0.00330330985492516	0.100935234527392	-1.70003866144384	9	9	+	-	+
>sp|P30460|1B08_HUMAN HLA class I histocompatibility antigen, B-8 alpha chain OS=Homo sapiens GN=HLA-B PE=1 SV=1	16.6218112701683	16.6720512174971	16.7273940415232	18.6528840615306	17.5729746664436	17.5068920883619	18.0467485642175	17.8240258349098	17.9137434711858	16.0099127797648	16.2573425531928	16.2415071518433	15.7305424858134	17.3237164183847	18.0748981402642	15.4621689590199	15.1724671932263	14.9326604579853	17.50428	16.13391	18	HLA-B	>sp|P30460|1B08_HUMAN HLA class I histocompatibility antigen, B-8 alpha chain OS=Homo sapiens GN=HLA-B PE=1 SV=1	1.37037	16.8190967419629	-3.40034880535284	0.00331073483085431	0.100935234527392	-1.70207705817417	9	9	-	+	-
>sp|Q8IXB1|DJC10_HUMAN DnaJ homolog subfamily C member 10 OS=Homo sapiens GN=DNAJC10 PE=1 SV=2	19.3908035271483	19.1349005448532	18.626338638156	18.9017258915046	19.1669025058897	19.1144694922918	17.7457807652177	18.6195629475851	18.6240613504071	18.6110521185481	18.885948049083	18.2654870387993	16.6956657847587	17.4449079225598	17.7297520930157	17.5172026761254	17.7366479011066	18.0223693964834	18.81384	17.87878	33	DNAJC10	>sp|Q8IXB1|DJC10_HUMAN DnaJ homolog subfamily C member 10 OS=Homo sapiens GN=DNAJC10 PE=1 SV=2	0.935057	18.3463099246408	-3.39344344941271	0.00336108073739806	0.100935234527392	-1.71577836979807	9	9	-	+	-
>sp|O60508|PRP17_HUMAN Pre-mRNA-processing factor 17 OS=Homo sapiens GN=CDC40 PE=1 SV=1	17.2797461812242	16.3155155627896	16.3352022943146	15.6945429880553	15.5667107711862	16.0498128104258	16.2151898700852	16.5149888104036	16.0733842017329	17.1443755588817	17.1585315470228	16.1504175914049	17.7325843948623	17.3162178585845	17.4924266702905	16.9125131521878	16.5038469450095	16.9015274152906	16.22723	17.03472	32	CDC40	>sp|O60508|PRP17_HUMAN Pre-mRNA-processing factor 17 OS=Homo sapiens GN=CDC40 PE=1 SV=1	-0.807483	16.630974145764	3.39044592571296	0.00338317009165135	0.100935234527392	-1.72172472535178	9	9	-	-	-
>sp|Q9UBL3|ASH2L_HUMAN Set1/Ash2 histone methyltransferase complex subunit ASH2 OS=Homo sapiens GN=ASH2L PE=1 SV=1	18.8364803407716	19.3049101129744	19.3232591160261	19.5513855068201	19.0755593825772	19.5256065690926	16.8358088811185	16.5038469450095	16.8228144450523	15.3953020909582	15.8531775809387	19.8232095993012	12.7215862908649	14.4533359262792	14.4256083993026	17.0719308367098	16.3588388025253	16.3677882552757	18.41996	15.83009	28	ASH2L	>sp|Q9UBL3|ASH2L_HUMAN Set1/Ash2 histone methyltransferase complex subunit ASH2 OS=Homo sapiens GN=ASH2L PE=1 SV=1	2.58988	17.1250249489777	-3.38909020042103	0.00339320776812377	0.100935234527392	-1.72441391209545	9	9	-	-	+
>sp|Q07021|C1QBP_HUMAN Complement component 1 Q subcomponent-binding protein, mitochondrial OS=Homo sapiens GN=C1QBP PE=1 SV=1	17.4403361528039	17.9974810444382	17.9600882350204	17.52474489028	18.0752188262362	18.1842903975544	17.309416434588	19.4622927023199	16.849787967092	21.5394897898411	18.1838427597099	20.4724583507592	18.1324092018447	18.6802733904728	17.9536411805053	20.3197191717163	19.7778410438715	20.8272360951478	17.86707	19.54299	14	C1QBP	>sp|Q07021|C1QBP_HUMAN Complement component 1 Q subcomponent-binding protein, mitochondrial OS=Homo sapiens GN=C1QBP PE=1 SV=1	-1.67592	18.7050315352334	3.38749857908266	0.00340502956431382	0.100935234527392	-1.72757082417825	9	9	+	+	+
>tr|G3XAN5|G3XAN5_HUMAN Aspartate beta-hydroxylase, isoform CRA_c OS=Homo sapiens GN=ASPH PE=1 SV=1	17.4157418084407	18.0725780910374	18.6110521185481	18.9546372808254	18.8317312234601	18.9579473834814	15.6330973946142	12.6955218954773	15.6972929947479	17.0609216999811	12.6955218954773	14.9511790025661	12.7215862908649	17.6536385090071	12.6955218954773	12.6955218954773	12.6955218954773	12.6955218954773	17.20773	13.98499	5	ASPH	>tr|G3XAN5|G3XAN5_HUMAN Aspartate beta-hydroxylase, isoform CRA_c OS=Homo sapiens GN=ASPH PE=1 SV=1	3.22274	15.5963630650244	-3.38717375562089	0.00340744719277323	0.100935234527392	-1.72821507180355	9	9	-	+	-
>sp|P13747|HLAE_HUMAN HLA class I histocompatibility antigen, alpha chain E OS=Homo sapiens GN=HLA-E PE=1 SV=3	16.2361233826402	16.4291234533999	16.4946857519296	18.5353289948079	17.1459195853442	16.9636730267933	18.0467485642175	17.8240258349098	17.9137434711858	15.737805236915	15.8103063738595	15.4100268531522	15.7305424858134	17.0249821524297	17.756491159907	12.6955218954773	13.8498071486486	13.7433038192886	17.28771	15.30653	18	HLA-E	>sp|P13747|HLAE_HUMAN HLA class I histocompatibility antigen, alpha chain E OS=Homo sapiens GN=HLA-E PE=1 SV=3	1.98118	16.29711995504	-3.3794483001686	0.00346544952847991	0.101753252569807	-1.74353498364972	9	9	-	+	-
>tr|H3BR71|H3BR71_HUMAN TATA box-binding protein-associated factor RNA polymerase I subunit C (Fragment) OS=Homo sapiens GN=TAF1C PE=1 SV=1	18.3141783515358	19.335877267049	19.0761849267677	18.4475535561843	18.4514984180011	18.6240613504071	13.9079060122664	14.7280812126903	14.1975042558991	12.9535801555507	13.8750683402448	18.8573722323704	12.7215862908649	12.6955218954773	12.6955218954773	14.3726463153384	14.1051624427383	13.895317054267	17.23143	14.01909	15	TAF1C	>tr|H3BR71|H3BR71_HUMAN TATA box-binding protein-associated factor RNA polymerase I subunit C (Fragment) OS=Homo sapiens GN=TAF1C PE=1 SV=1	3.21234	15.625256776285	-3.37788975811117	0.00347726869450427	0.101753252569807	-1.74662503371021	9	9	-	-	-
>tr|F8WD15|F8WD15_HUMAN Insulin-like growth factor 2 mRNA-binding protein 3 OS=Homo sapiens GN=IGF2BP3 PE=1 SV=1	20.9135494730528	20.752497607688	20.9191501872769	20.8456803987846	20.5223460049547	20.9747646644698	21.8565917777512	21.4464239164112	21.1778318707475	21.7420192877129	21.5716723547066	21.839710500656	21.1685435626778	21.4470222884243	22.030106958983	22.2493054986847	22.1706875863639	21.2154571360186	21.04543	21.71495	5	IGF2BP3	>tr|F8WD15|F8WD15_HUMAN Insulin-like growth factor 2 mRNA-binding protein 3 OS=Homo sapiens GN=IGF2BP3 PE=1 SV=1	-0.669521	21.3801867264091	3.37518183158459	0.00349789896647958	0.101753252569807	-1.75199342697514	9	9	+	-	+
>sp|P02533|K1C14_HUMAN Keratin, type I cytoskeletal 14 OS=Homo sapiens GN=KRT14 PE=1 SV=4	22.7696472029797	22.4293504713944	22.5422418111696	23.7909542698544	23.8075139000009	24.0006703772156	22.2421451220973	22.1070075002699	22.737173323415	21.7291205352982	21.7637966141148	21.0769352671316	22.0758355928352	22.4189059203192	22.1694250253422	22.0682608123831	21.770561486576	22.6404355486342	22.9363	21.96814	24	KRT14	>sp|P02533|K1C14_HUMAN Keratin, type I cytoskeletal 14 OS=Homo sapiens GN=KRT14 PE=1 SV=4	0.968159	22.4522211545017	-3.36665241652116	0.00356367345736943	0.103049557475599	-1.76889867029905	9	9	+	-	+
>tr|K7EIR4|K7EIR4_HUMAN Septin-9 (Fragment) OS=Homo sapiens GN=SEPT9 PE=1 SV=1	22.2510732009454	21.9920756040695	22.0139515640597	20.9424962179696	21.4019712298159	21.4482324853074	22.1588403276195	22.8898040719475	21.3575718282327	20.5611365199569	20.4092699417082	21.4681961795484	19.1962592985714	20.567943812594	19.0716065904461	20.8903166834321	21.5742761823801	21.6254292536831	21.82845	20.59605	5	SEPT9	>tr|K7EIR4|K7EIR4_HUMAN Septin-9 (Fragment) OS=Homo sapiens GN=SEPT9 PE=1 SV=1	1.2324	21.2122472773493	-3.35864050396312	0.00362656904427827	0.104247765781679	-1.78477247123569	9	9	+	-	-
>tr|H0Y650|H0Y650_HUMAN Dynein assembly factor 5, axonemal (Fragment) OS=Homo sapiens GN=DNAAF5 PE=1 SV=1	12.6955218954773	12.6955218954773	12.6955218954773	12.5739233393347	11.9251648107861	12.0359226401773	12.6955218954773	12.6955218954773	12.6955218954773	13.9079060122664	14.2454156403185	12.6955218954773	14.7519645670175	15.3010442715998	14.7324692806317	12.6955218954773	12.6955218954773	12.6955218954773	12.52313	13.74677	34	DNAAF5	>tr|H0Y650|H0Y650_HUMAN Dynein assembly factor 5, axonemal (Fragment) OS=Homo sapiens GN=DNAAF5 PE=1 SV=1	-1.22364	13.1349460842725	3.35450327582243	0.0036594751552968	0.104574884143717	-1.79296723774905	9	9	-	-	-
>sp|Q9BW19|KIFC1_HUMAN Kinesin-like protein KIFC1 OS=Homo sapiens GN=KIFC1 PE=1 SV=2	19.9762832651881	19.9710646918929	18.7037968845005	17.9878009363027	18.2358180406181	19.1377205765724	19.9837942075344	19.8753182337194	19.4975216744683	16.8262911544862	15.717300992745	16.3557998530101	17.3276204250962	17.0934019337684	18.384974575308	20.2297239855362	18.2069157435431	18.1404690980259	19.26324	17.58694	35	KIFC1	>sp|Q9BW19|KIFC1_HUMAN Kinesin-like protein KIFC1 OS=Homo sapiens GN=KIFC1 PE=1 SV=2	1.67629	18.4250897929064	-3.34008541438155	0.00377646946995198	0.105880391885111	-1.82151318424274	9	9	-	+	+
>tr|Q5VU11|Q5VU11_HUMAN Ribonuclease P protein subunit p30 (Fragment) OS=Homo sapiens GN=RPP30 PE=1 SV=1	17.9047748799075	16.9733303433004	17.4359944867043	14.8669286913891	15.103168445853	15.2380871825869	16.9071377168726	16.42939527899	16.6896040070573	17.9305732109233	17.7651064299173	17.6826603319834	17.7656634514888	17.8555189151189	17.421685157221	17.4612580849445	17.0389405330152	17.6543639404678	16.39427	17.61953	14	RPP30	>tr|Q5VU11|Q5VU11_HUMAN Ribonuclease P protein subunit p30 (Fragment) OS=Homo sapiens GN=RPP30 PE=1 SV=1	-1.22526	17.0068995048745	3.33934544765534	0.00378257252344104	0.105880391885111	-1.82297773201233	9	9	-	-	+
>tr|H0YNQ3|H0YNQ3_HUMAN Aldehyde dehydrogenase family 1 member A3 OS=Homo sapiens GN=ALDH1A3 PE=1 SV=1	18.7280342584947	18.6976852737313	18.6887954700716	18.6930605566483	19.1012281120752	18.7070839162182	17.633791467129	17.1848101167618	17.1386464577341	20.8571410387966	20.383389066943	18.5628901084336	19.5500193196328	19.1019577883099	19.3222763116775	18.1657326876184	19.7323333284604	20.1440781394653	18.2859	19.53554	8	ALDH1A3	>tr|H0YNQ3|H0YNQ3_HUMAN Aldehyde dehydrogenase family 1 member A3 OS=Homo sapiens GN=ALDH1A3 PE=1 SV=1	-1.24963	18.9107196343445	3.33869713959518	0.00378792759639189	0.105880391885111	-1.82426082654115	9	9	+	-	-
>sp|Q8N1T3|MYO1H_HUMAN Unconventional myosin-Ih OS=Homo sapiens GN=MYO1H PE=2 SV=2	15.4877951759948	14.417094962769	14.5215016234265	17.0366971306529	11.6139689121823	12.6955218954773	17.0264716152541	17.2434169799383	16.7181563747252	14.4545799753619	12.6955218954773	12.9552670858546	12.7215862908649	11.4187161164711	12.6955218954773	12.6955218954773	13.7067443982928	9.55450057831491	15.19562	12.54422	45	MYO1H	>sp|Q8N1T3|MYO1H_HUMAN Unconventional myosin-Ih OS=Homo sapiens GN=MYO1H PE=2 SV=2	2.65141	13.8699213778896	-3.33600297319077	0.00381026184641631	0.105880391885111	-1.82959254916645	9	9	-	-	-
>sp|Q9NZI8|IF2B1_HUMAN Insulin-like growth factor 2 mRNA-binding protein 1 OS=Homo sapiens GN=IGF2BP1 PE=1 SV=2	22.9370844478237	22.3180191120181	22.3823151854891	22.1177079538707	22.2421451220973	22.5462278938388	22.0143442332709	22.1737431087997	21.9457654605647	22.3020106259445	22.7749452830025	22.8366258253217	22.737173323415	23.2161239958956	22.8945845643984	22.706610253237	22.7676019322734	22.9345392105987	22.29748	22.79669	28	IGF2BP1	>sp|Q9NZI8|IF2B1_HUMAN Insulin-like growth factor 2 mRNA-binding protein 1 OS=Homo sapiens GN=IGF2BP1 PE=1 SV=2	-0.499207	22.5470870851033	3.33329719939627	0.00383282305043486	0.105880391885111	-1.8349465602384	9	9	+	-	+
>tr|H0YB80|H0YB80_HUMAN 14-3-3 protein zeta/delta (Fragment) OS=Homo sapiens GN=YWHAZ PE=1 SV=1	22.3767128733868	22.9238832421993	22.5116169030283	23.9617830237886	23.7867803844713	23.9250823551896	22.6851385802707	21.9398398522604	23.161450335951	21.7177357662475	22.1706875863639	22.3397147724555	22.8165531961038	22.8783246941095	21.4730081919759	21.3180133137048	21.3497064606857	21.8084002222424	23.03025	21.98579	7	YWHAZ	>tr|H0YB80|H0YB80_HUMAN 14-3-3 protein zeta/delta (Fragment) OS=Homo sapiens GN=YWHAZ PE=1 SV=1	1.04446	22.5080239863575	-3.33292578761651	0.00383593021238772	0.105880391885111	-1.83568143235094	9	9	+	-	+
>sp|P61978|HNRPK_HUMAN Heterogeneous nuclear ribonucleoprotein K OS=Homo sapiens GN=HNRNPK PE=1 SV=1	22.5255976288192	22.7856388753032	22.3934224036314	22.1906431546607	22.465714089424	22.3869951509857	22.9834282813081	22.8984611054134	22.8517379793371	22.9953567055665	22.9895706469119	23.5947296175179	24.1014384951031	22.856719251831	22.9739927170489	22.9564787775575	23.0425812475895	23.3138336080961	22.60907	23.20274	26	HNRNPK	>sp|P61978|HNRPK_HUMAN Heterogeneous nuclear ribonucleoprotein K OS=Homo sapiens GN=HNRNPK PE=1 SV=1	-0.593674	22.905907763117	3.32824196085731	0.00387532809459064	0.10596838559442	-1.84494769379294	9	9	+	+	+
>sp|Q6UW68|TM205_HUMAN Transmembrane protein 205 OS=Homo sapiens GN=TMEM205 PE=1 SV=1	17.1753238281661	18.7813676673645	18.617058585458	19.9069606768371	19.3478935676718	19.9785665881444	17.8516259437972	18.0564898936108	17.9570045618535	18.0605581460013	18.5325664278561	17.1069073098376	16.8645087641414	16.7654738284281	16.469718630189	16.6340962749264	12.3712622702213	14.1278436660083	18.63025	16.32588	7	TMEM205	>sp|Q6UW68|TM205_HUMAN Transmembrane protein 205 OS=Homo sapiens GN=TMEM205 PE=1 SV=1	2.30437	17.4780681461396	-3.32668804433604	0.00388848677077089	0.10596838559442	-1.84802142906151	9	9	-	-	-
>tr|D6R9T8|D6R9T8_HUMAN Probable ATP-dependent RNA helicase YTHDC2 (Fragment) OS=Homo sapiens GN=YTHDC2 PE=1 SV=1	17.5197572877341	16.6740395348238	16.9822104411272	16.9843509132671	16.7074044875927	16.3794342184002	17.9311166591838	17.9562459138765	18.0199732048431	20.8638437305873	21.3555310026099	17.3424655273441	20.0538256321293	18.1462007929175	18.9364433208165	17.7081031600502	17.9509857275482	18.1873567027117	17.23939	18.94942	7	YTHDC2	>tr|D6R9T8|D6R9T8_HUMAN Probable ATP-dependent RNA helicase YTHDC2 (Fragment) OS=Homo sapiens GN=YTHDC2 PE=1 SV=1	-1.71002	18.094404903198	3.32479724340853	0.00390455764129296	0.10596838559442	-1.85176123003442	9	9	-	-	-
>tr|K7EJW8|K7EJW8_HUMAN Very long-chain-specific acyl-CoA dehydrogenase, mitochondrial (Fragment) OS=Homo sapiens GN=ACADVL PE=1 SV=6	16.9396491951982	16.5329378781107	17.0037545944893	17.3853491594064	15.8678218036441	16.121342236165	16.0044655964412	15.8080915731198	15.6417161635846	12.6955218954773	14.7207400337226	15.9076613937453	12.7215862908649	14.9965414579638	14.8041256204904	15.7813844278815	15.4560140456386	16.2548419506016	16.36724	14.81538	9	ACADVL	>tr|K7EJW8|K7EJW8_HUMAN Very long-chain-specific acyl-CoA dehydrogenase, mitochondrial (Fragment) OS=Homo sapiens GN=ACADVL PE=1 SV=6	1.55186	15.5913080731414	-3.31604848704439	0.00397977433887219	0.107409687434673	-1.86906084686542	9	9	+	-	+
>tr|H0Y6T8|H0Y6T8_HUMAN Ras-related protein Rab-18 (Fragment) OS=Homo sapiens GN=RAB18 PE=1 SV=1	17.887334911029	18.7114365455974	17.9209636593447	19.2701503725026	19.7025903496925	19.1087319302298	18.9270051017379	18.0513890482432	21.0454975380372	18.3154530300984	17.6228983513123	17.5769004559001	16.9707759650955	18.0011843630907	17.8202197450024	17.1710208909949	18.6235131857864	17.3736718698375	18.95834	17.71952	18	RAB18	>tr|H0Y6T8|H0Y6T8_HUMAN Ras-related protein Rab-18 (Fragment) OS=Homo sapiens GN=RAB18 PE=1 SV=1	1.23883	18.3389298507518	-3.31127170095268	0.00402144332322927	0.107934650078717	-1.8785032212738	9	9	-	+	-
>tr|K7EMD6|K7EMD6_HUMAN Small glutamine-rich tetratricopeptide repeat-containing protein alpha (Fragment) OS=Homo sapiens GN=SGTA PE=1 SV=1	16.49764931737	15.3098645520348	15.9931414764813	14.3030714140091	14.7344807176644	12.6955218954773	13.9617056876996	13.9058329873668	13.8159894780761	12.6955218954773	12.9224615208537	13.5523841966646	12.7215862908649	12.6955218954773	12.6955218954773	13.2943116763763	14.2601798628193	13.6395087429007	14.5797	13.16411	8	SGTA	>tr|K7EMD6|K7EMD6_HUMAN Small glutamine-rich tetratricopeptide repeat-containing protein alpha (Fragment) OS=Homo sapiens GN=SGTA PE=1 SV=1	1.41558	13.871903083505	-3.30861702151771	0.0040447862654503	0.10796467954702	-1.88374980983287	9	9	+	-	-
>tr|C9JUW1|C9JUW1_HUMAN UTP--glucose-1-phosphate uridylyltransferase (Fragment) OS=Homo sapiens GN=UGP2 PE=1 SV=1	17.2621901744136	17.6885125139575	18.1290955222829	20.9674680480372	18.3426599914574	17.641590382038	17.9448908608742	19.7573847420011	17.6138634288243	19.8270564854741	19.9137860287013	20.1121160901568	20.366602543477	21.108503904553	19.8342007780807	18.7050639130445	19.001433481898	20.0160460298584	18.37196	19.87609	8	UGP2	>tr|C9JUW1|C9JUW1_HUMAN UTP--glucose-1-phosphate uridylyltransferase (Fragment) OS=Homo sapiens GN=UGP2 PE=1 SV=1	-1.50413	19.1240258288406	3.30420694338913	0.00408386014420305	0.108411981314418	-1.8924641397207	9	9	+	-	+
>sp|P43353|AL3B1_HUMAN Aldehyde dehydrogenase family 3 member B1 OS=Homo sapiens GN=ALDH3B1 PE=1 SV=1	16.0725168396012	18.4382800649698	15.2896424068022	16.8430523014684	17.6208121870198	16.8346141015585	17.299746217589	16.9914969634171	18.5019174878207	18.7877054360225	17.9878009363027	17.6183875044503	18.9296026892596	18.4328697291207	18.6899197760969	18.0619114520671	18.89723751538	17.7124679514198	17.09912	18.34643	20	ALDH3B1	>sp|P43353|AL3B1_HUMAN Aldehyde dehydrogenase family 3 member B1 OS=Homo sapiens GN=ALDH3B1 PE=1 SV=1	-1.24731	17.7227767533537	3.29751879095564	0.00414382878028301	0.109406088122907	-1.90567622405973	9	9	+	-	-
>sp|P17693|HLAG_HUMAN HLA class I histocompatibility antigen, alpha chain G OS=Homo sapiens GN=HLA-G PE=1 SV=1	16.4609041375258	16.7781287251928	16.4946857519296	18.7397617469086	17.6217171519088	17.3935439102569	18.0467485642175	17.8240258349098	17.9137434711858	15.737805236915	15.8103063738595	15.7838916830439	16.0085121488353	17.4362221231116	18.0208619282586	12.6955218954773	13.8498071486486	13.7433038192886	17.47481	15.45403	18	HLA-G	>sp|P17693|HLAG_HUMAN HLA class I histocompatibility antigen, alpha chain G OS=Homo sapiens GN=HLA-G PE=1 SV=1	2.02078	16.4644162028597	-3.29086705906515	0.00420433098273139	0.110403458995184	-1.91881184708584	9	9	-	+	-
>tr|D6RGJ3|D6RGJ3_HUMAN Microtubule-associated protein 1B (Fragment) OS=Homo sapiens GN=MAP1B PE=1 SV=1	20.6240712209547	20.5539372396335	20.410510041453	21.7481258509977	21.8577497184036	21.7617428495738	20.9883427788358	20.9674680480372	20.2499511286344	19.5736433488237	19.7666611266809	20.2309929606495	19.6986056988597	18.8006627659882	19.1066082146481	20.8315016945675	20.8751522523621	20.6976356939066	21.01799	19.9535	6	MAP1B	>tr|D6RGJ3|D6RGJ3_HUMAN Microtubule-associated protein 1B (Fragment) OS=Homo sapiens GN=MAP1B PE=1 SV=1	1.06449	20.4857423685006	-3.28576917024998	0.00425128795468776	0.111036327332651	-1.92887590366457	9	9	+	-	-
>tr|D6RDY6|D6RDY6_HUMAN Signal recognition particle subunit SRP72 (Fragment) OS=Homo sapiens GN=SRP72 PE=1 SV=2	17.3329909362884	17.0761557414509	16.9741871835017	16.7605860398181	16.8546502223233	16.462005515369	17.2834482648154	17.6769585387951	17.6775673340844	18.0755725443359	18.0970352720557	18.7120043203036	19.0460109482503	18.2289066037086	18.6726247583567	17.7604566554949	17.6018614626191	16.4588491519319	17.12206	18.07259	15	SRP72	>tr|D6RDY6|D6RDY6_HUMAN Signal recognition particle subunit SRP72 (Fragment) OS=Homo sapiens GN=SRP72 PE=1 SV=2	-0.95053	17.5973261940835	3.28203870552841	0.00428597631454056	0.11134370554031	-1.93623872753239	9	9	-	-	-
>tr|B8ZZK2|B8ZZK2_HUMAN Gamma-glutamylcyclotransferase OS=Homo sapiens GN=GGCT PE=1 SV=1	16.2820722552309	15.7736147456448	16.3637526225196	12.6955218954773	12.6955218954773	12.6955218954773	16.6621359111798	16.4950746649968	16.6983946186617	17.6188456055506	16.370774483938	16.6750198565036	17.9047748799075	17.9965452351076	18.2953563255651	16.7327143562008	16.9330676750952	16.7015511323523	15.15129	17.24763	10	GGCT	>tr|B8ZZK2|B8ZZK2_HUMAN Gamma-glutamylcyclotransferase OS=Homo sapiens GN=GGCT PE=1 SV=1	-2.09634	16.1994588919381	3.26777235435837	0.00442122327056967	0.112748719629091	-1.96438264614574	9	9	-	-	-
>tr|A0A0A0MST9|A0A0A0MST9_HUMAN MAP/microtubule affinity-regulating kinase 3 OS=Homo sapiens GN=MARK3 PE=1 SV=1	17.0499792120938	17.6640308789933	17.0253276622503	16.8147415257438	17.0535948104599	16.7759780529122	17.3281168677821	18.1424935699212	17.084886808591	18.131044973086	18.1880170845431	16.9477013741318	18.4363578535862	18.5592370758908	18.8595800876235	17.591961890859	17.897797794756	17.6148821952686	17.21546	18.02518	32	MARK3	>tr|A0A0A0MST9|A0A0A0MST9_HUMAN MAP/microtubule affinity-regulating kinase 3 OS=Homo sapiens GN=MARK3 PE=1 SV=1	-0.809715	17.620318317694	3.26652013925127	0.00443329300423903	0.112748719629091	-1.96685190804544	9	9	-	-	-
>sp|Q9HBM6|TAF9B_HUMAN Transcription initiation factor TFIID subunit 9B OS=Homo sapiens GN=TAF9B PE=1 SV=1	14.1113328824986	12.9511898182408	12.7185435833854	12.6955218954773	12.6955218954773	12.6955218954773	15.4470845665102	15.2841999498944	15.5200888935926	13.274147312809	14.5117295603626	14.9574710416409	17.0508142112837	16.6436447981693	15.971569081642	15.9872280399107	15.9978178414745	16.472800818257	13.791	15.65191	14	TAF9B	>sp|Q9HBM6|TAF9B_HUMAN Transcription initiation factor TFIID subunit 9B OS=Homo sapiens GN=TAF9B PE=1 SV=1	-1.86091	14.7214571158947	3.26482508699081	0.00444968277076545	0.112748719629091	-1.97019413584408	9	9	-	-	-
>sp|O00505|IMA4_HUMAN Importin subunit alpha-4 OS=Homo sapiens GN=KPNA3 PE=1 SV=2	20.5214796378491	20.4961378645262	19.723014145044	20.4669568999933	20.7929093999263	21.086479161726	19.4212016098501	17.075139956224	19.5241518486831	19.3606918746722	19.8456524581089	19.5157042347687	12.7215862908649	16.1087972619008	14.7846853599422	17.0199088513569	17.6596140568257	17.1605818263914	19.90083	17.1308	19	KPNA3	>sp|O00505|IMA4_HUMAN Importin subunit alpha-4 OS=Homo sapiens GN=KPNA3 PE=1 SV=2	2.77003	18.5158162632585	-3.26198107596722	0.00447731603999903	0.112748719629091	-1.97580112482215	9	9	+	-	+
>sp|Q9NZB2|F120A_HUMAN Constitutive coactivator of PPAR-gamma-like protein 1 OS=Homo sapiens GN=FAM120A PE=1 SV=2	19.3068665454319	19.0949513179491	18.941976443734	19.0391754622615	19.2256170809314	19.0270736045246	18.9213743147404	18.9394378687028	19.1047440012489	19.5128968274235	19.5805713454517	19.4206130521183	19.1382740453691	19.0915535686774	19.2878293157193	19.9553003382761	20.0102676598018	20.1084987109576	19.0668	19.56731	52	FAM120A	>sp|Q9NZB2|F120A_HUMAN Constitutive coactivator of PPAR-gamma-like protein 1 OS=Homo sapiens GN=FAM120A PE=1 SV=2	-0.50051	19.3170567501844	3.25410090731942	0.00455476698490505	0.112748719629091	-1.99133228823153	9	9	+	+	-
>sp|Q15043|S39AE_HUMAN Zinc transporter ZIP14 OS=Homo sapiens GN=SLC39A14 PE=1 SV=3	15.4033965589785	15.306378618647	15.8459840241077	14.9142106270727	12.6955218954773	12.6955218954773	12.0217640560492	13.3575709224718	14.3857333614242	16.3061337053136	17.2175750920182	16.8958189688955	15.642778383547	17.6758765676408	15.6676509642002	14.9409806700783	14.4052215320973	14.918456777324	14.06956	15.96339	16	SLC39A14	>sp|Q15043|S39AE_HUMAN Zinc transporter ZIP14 OS=Homo sapiens GN=SLC39A14 PE=1 SV=3	-1.89382	15.0164763678234	3.25321966660405	0.00456350982909836	0.112748719629091	-1.9930687131098	9	9	-	-	-
>sp|P07942|LAMB1_HUMAN Laminin subunit beta-1 OS=Homo sapiens GN=LAMB1 PE=1 SV=2	17.2815497836205	17.9062626680979	16.9721008692358	17.8161828374349	17.6989233771135	17.3259149235293	17.7073458940629	17.198671049619	17.494462148488	15.7953880484114	15.8583605023741	16.1427815316503	16.3840820186307	16.9649388414552	15.9443145491671	17.5185563767145	17.4920561848759	17.4195347250419	17.48905	16.61333	75	LAMB1	>sp|P07942|LAMB1_HUMAN Laminin subunit beta-1 OS=Homo sapiens GN=LAMB1 PE=1 SV=2	0.875711	17.0511903516402	-3.25285941974462	0.00456708861083387	0.112748719629091	-1.99377853009388	9	9	-	-	-
>sp|P0C866|F91A2_HUMAN Putative uncharacterized protein encoded by LINC00869 OS=Homo sapiens GN=LINC00869 PE=5 SV=1	13.2247497515021	12.7646984096023	13.1235292858111	15.406180603927	15.1766375858486	15.3733122083735	14.826843059939	13.7100418216689	14.7911039005576	16.149071494536	16.6483457937523	15.9111029465179	15.1537893368317	16.0283086323216	16.3456948767869	14.8705806965254	14.8341262060263	14.7245495854203	14.26634	15.62951	11	LINC00869	>sp|P0C866|F91A2_HUMAN Putative uncharacterized protein encoded by LINC00869 OS=Homo sapiens GN=LINC00869 PE=5 SV=1	-1.36316	14.9479258997749	3.25205684317101	0.00457507153177192	0.112748719629091	-1.99535984493642	9	9	-	-	-
>tr|D6RAU8|D6RAU8_HUMAN Calnexin (Fragment) OS=Homo sapiens GN=CANX PE=1 SV=1	21.5553078088017	22.1670161206027	21.7848234356744	22.3180191120181	22.468764540792	22.5669446296855	20.9271772349257	20.9135494730528	20.9453871152662	20.992996342152	21.0553508642289	21.1992582284177	21.1959501686567	20.4824068751817	18.3053509917463	20.4946352064373	20.5693733761983	20.5687748991281	21.73855	20.54046	5	CANX	>tr|D6RAU8|D6RAU8_HUMAN Calnexin (Fragment) OS=Homo sapiens GN=CANX PE=1 SV=1	1.1981	21.1395048012759	-3.25187177172359	0.0045769143122733	0.112748719629091	-1.99572448058075	9	9	-	+	-
>tr|Q5H928|Q5H928_HUMAN 3-hydroxyacyl-CoA dehydrogenase type-2 OS=Homo sapiens GN=HSD17B10 PE=1 SV=1	17.877633784655	16.8907747107515	18.526981117334	17.671728381394	19.2232388865505	17.4585485554044	18.7272923494017	15.7359073898414	18.0708795028503	14.895063861292	16.6129543434819	14.6034226848893	18.4724613604297	16.0044655964412	17.1091848378281	16.8326616991555	14.3989216292525	14.7126850429153	17.79811	15.9602	9	HSD17B10	>tr|Q5H928|Q5H928_HUMAN 3-hydroxyacyl-CoA dehydrogenase type-2 OS=Homo sapiens GN=HSD17B10 PE=1 SV=1	1.83791	16.8791558741038	-3.25016884275001	0.00459390488881366	0.112748719629091	-1.99907948368507	9	9	+	-	-
>sp|Q9NYZ3|GTSE1_HUMAN G2 and S phase-expressed protein 1 OS=Homo sapiens GN=GTSE1 PE=1 SV=3	20.0808491942574	20.3039531841335	19.3054075439049	20.2523325150012	20.674670842893	20.7012432803671	18.9699428179387	19.5095779998369	19.3054075439049	19.4098063295047	19.6131564185609	18.6952819234313	11.8611198653523	12.6955218954773	12.2169551333307	18.5605893113358	19.3059820261828	12.6955218954773	19.90038	16.1171	33	GTSE1	>sp|Q9NYZ3|GTSE1_HUMAN G2 and S phase-expressed protein 1 OS=Homo sapiens GN=GTSE1 PE=1 SV=3	3.78327	18.0087399844939	-3.24664412134933	0.00462926923065519	0.112748719629091	-2.00602263152417	9	9	-	+	-
>tr|E7ERB5|E7ERB5_HUMAN Plasminogen activator inhibitor 2 (Fragment) OS=Homo sapiens GN=SERPINB2 PE=1 SV=1	16.8405669139221	16.6787464387867	16.9868109997418	18.5315979064017	18.5148724179392	18.6490357479066	15.9902762625489	14.6675164634295	16.1031561292571	14.9400928607104	16.3966128025756	12.6955218954773	12.7215862908649	16.2898999688336	12.6955218954773	16.011661394332	15.5350610850146	15.7972945997221	16.99584	14.78703	6	SERPINB2	>tr|E7ERB5|E7ERB5_HUMAN Plasminogen activator inhibitor 2 (Fragment) OS=Homo sapiens GN=SERPINB2 PE=1 SV=1	2.20881	15.8914351151634	-3.24661049375461	0.00462960790968826	0.112748719629091	-2.00608886585773	9	9	+	-	-
>tr|Q31611|Q31611_HUMAN B2 microglobulin OS=Homo sapiens GN=HLA-G2.2 PE=1 SV=1	16.9062587397329	17.3156442090967	17.0162264101881	19.2003230839965	18.1202452380667	17.8820820699388	18.5192233274936	18.2908211828462	18.3910105197661	16.2444968124288	16.2989682698229	16.3093547029671	16.3961962670125	17.9018771596221	18.5192233274936	12.6955218954773	14.3359591137679	14.2755739654204	17.9602	15.88635	13	HLA-G2.2	>tr|Q31611|Q31611_HUMAN B2 microglobulin OS=Homo sapiens GN=HLA-G2.2 PE=1 SV=1	2.07385	16.9232781275077	-3.24237512095927	0.00467245961118716	0.112748719629091	-2.01443001023875	9	9	-	+	-
>sp|Q9P003|CNIH4_HUMAN Protein cornichon homolog 4 OS=Homo sapiens GN=CNIH4 PE=1 SV=1	18.6108873684165	18.7670752931385	19.4055761291655	19.7859318057098	19.1535569539871	19.0212654143695	16.0631197848386	17.1126979529971	16.4224887127272	18.1525508544487	18.4355395545783	18.3536469398372	12.7215862908649	12.6955218954773	12.6955218954773	12.6955218954773	16.7773929433194	12.6955218954773	18.26029	15.02476	4	CNIH4	>sp|Q9P003|CNIH4_HUMAN Protein cornichon homolog 4 OS=Homo sapiens GN=CNIH4 PE=1 SV=1	3.23553	16.6425224211282	-3.2423534818552	0.00467267954442854	0.112748719629091	-2.01447262105888	9	9	-	+	-
>tr|E9PDU6|E9PDU6_HUMAN Calponin (Fragment) OS=Homo sapiens GN=CNN3 PE=1 SV=1	18.5138000336508	18.3669808614557	18.1712820279389	18.4900561311567	18.4291697580651	18.4611710867157	18.4431592145223	18.1660973109166	17.3981156484255	18.8320259009848	18.6210748134461	18.4006345517775	19.5418220744211	20.3184266261496	19.4908422933281	18.5623543746303	19.4222174558982	18.5322461936374	18.27109	19.08018	9	CNN3	>tr|E9PDU6|E9PDU6_HUMAN Calponin (Fragment) OS=Homo sapiens GN=CNN3 PE=1 SV=1	-0.80909	18.6756375753956	3.24082964689742	0.00468819295287699	0.112748719629091	-2.01747315881043	9	9	-	-	-
>sp|Q9Y3A4|RRP7A_HUMAN Ribosomal RNA-processing protein 7 homolog A OS=Homo sapiens GN=RRP7A PE=1 SV=2	18.2392194652157	18.4574223035144	18.6934551320087	17.1233918939398	17.168457429582	17.405241055412	17.7408824440328	18.4671986571982	18.0810160878788	18.4788185832065	17.4656853154689	18.8344986913227	20.6723964769388	20.0022003432163	20.6457325191647	19.5460044973515	18.2610344581788	19.2848500481806	17.9307	19.24347	11	RRP7A	>sp|Q9Y3A4|RRP7A_HUMAN Ribosomal RNA-processing protein 7 homolog A OS=Homo sapiens GN=RRP7A PE=1 SV=2	-1.31277	18.587083633434	3.23279208171628	0.00477086084249039	0.113460841942063	-2.03329527354102	9	9	-	-	-
>sp|Q9Y312|AAR2_HUMAN Protein AAR2 homolog OS=Homo sapiens GN=AAR2 PE=1 SV=2	12.6955218954773	12.3573226201475	12.6955218954773	12.6955218954773	12.6955218954773	12.6955218954773	13.9331047466296	13.655609300357	14.6419845677212	14.3121358603311	14.6436399624342	13.927726765769	15.5200888935926	12.6955218954773	14.4663103868174	14.7371246545852	14.2831963801317	13.8803475012367	13.1184	14.27401	16	AAR2	>sp|Q9Y312|AAR2_HUMAN Protein AAR2 homolog OS=Homo sapiens GN=AAR2 PE=1 SV=2	-1.15561	13.6962068340343	3.23262777801959	0.00477256559080571	0.113460841942063	-2.03361863089911	9	9	-	-	-
>tr|H7C3F4|H7C3F4_HUMAN SAFB-like transcription modulator (Fragment) OS=Homo sapiens GN=SLTM PE=1 SV=1	20.7697622578373	20.1547033374146	20.2359250647917	21.4161318358786	20.844087646056	20.671378989048	21.3125133035366	19.5915614392326	20.4547722810172	19.2815772170354	20.7646283979004	20.3210976525617	19.5323195108252	19.8065636826199	19.3109454860957	20.0302495849069	18.9178465049815	18.1232187405329	20.60565	19.56538	21	SLTM	>tr|H7C3F4|H7C3F4_HUMAN SAFB-like transcription modulator (Fragment) OS=Homo sapiens GN=SLTM PE=1 SV=1	1.04027	20.0855157184596	-3.23086320831037	0.00479091182104237	0.113460841942063	-2.03709118857324	9	9	-	-	+
>tr|E9PP15|E9PP15_HUMAN Low-density lipoprotein receptor-related protein 8 OS=Homo sapiens GN=LRP8 PE=1 SV=1	15.3022096102335	16.4987668138894	16.4884281205625	15.2565848569104	14.96508698632	15.218886931398	17.3307460415698	17.8202197450024	17.6072799481883	11.3562948465429	11.9779792008257	15.3771641485285	14.4810928133966	12.6955218954773	12.6955218954773	14.6690907502566	16.6760816837637	16.0379816337527	16.27647	13.9963	25	LRP8	>tr|E9PP15|E9PP15_HUMAN Low-density lipoprotein receptor-related protein 8 OS=Homo sapiens GN=LRP8 PE=1 SV=1	2.28016	15.1363854401164	-3.22760415584682	0.00482497853172994	0.113460841942063	-2.04350383470039	9	9	-	+	-
>sp|Q15041|AR6P1_HUMAN ADP-ribosylation factor-like protein 6-interacting protein 1 OS=Homo sapiens GN=ARL6IP1 PE=1 SV=2	21.4320427545789	20.4286818187069	20.8552008286387	21.4871580934899	21.1045203644413	21.6802878728348	20.9371612623545	19.9849461712804	20.803994066504	19.8084275515475	19.8010281108612	20.1799193474596	20.8794118483419	20.7375855637002	20.5523063798452	18.5680878776283	20.1212861018864	19.2376182949091	20.96822	19.9873	6	ARL6IP1	>sp|Q15041|AR6P1_HUMAN ADP-ribosylation factor-like protein 6-interacting protein 1 OS=Homo sapiens GN=ARL6IP1 PE=1 SV=2	0.980925	20.4777591282783	-3.22631834591434	0.00483848440530074	0.113460841942063	-2.0460335048399	9	9	-	+	-
>sp|P04844|RPN2_HUMAN Dolichyl-diphosphooligosaccharide--protein glycosyltransferase subunit 2 OS=Homo sapiens GN=RPN2 PE=1 SV=3	20.4701506756969	19.9162502771257	20.4261536710104	22.0544524475088	22.0242933033682	22.0403565992162	20.823892152305	20.30906948809	20.633814847017	19.852688511809	19.6830654754971	20.7798745313982	18.37560640365	19.6281178553917	18.3539805467155	19.69451616952	20.5377019509518	20.3754024675686	20.96649	19.69788	27	RPN2	>sp|P04844|RPN2_HUMAN Dolichyl-diphosphooligosaccharide--protein glycosyltransferase subunit 2 OS=Homo sapiens GN=RPN2 PE=1 SV=3	1.26861	20.3321881874356	-3.22353066873823	0.00486789323274593	0.113460841942063	-2.05151724204762	9	9	-	+	+
>tr|I3L1Y2|I3L1Y2_HUMAN Heme oxygenase 2 (Fragment) OS=Homo sapiens GN=HMOX2 PE=1 SV=1	15.7642793848954	18.5368221937034	18.345001991203	16.5574042284517	17.1157598282045	18.8095826977537	16.7453076668469	17.0941301732979	17.3052069347712	15.387036009588	14.5925017243534	15.7316330970106	16.9039821375903	15.1393639957006	18.4333905070676	14.8332047166745	15.5873836248118	13.9441151680708	17.36372	15.61696	6	HMOX2	>tr|I3L1Y2|I3L1Y2_HUMAN Heme oxygenase 2 (Fragment) OS=Homo sapiens GN=HMOX2 PE=1 SV=1	1.74676	16.4903392266664	-3.22012096519486	0.00490410295966937	0.113460841942063	-2.05822333850784	9	9	-	+	-
>sp|Q562R1|ACTBL_HUMAN Beta-actin-like protein 2 OS=Homo sapiens GN=ACTBL2 PE=1 SV=2	24.6776099924402	24.8270436115035	24.8306410060122	26.0776334962717	25.9910780418864	25.807998627468	24.9118959151053	24.7922429494695	24.8167336049091	24.7196650813183	24.6207670441394	24.071029073118	24.5497188035286	24.7876726723084	23.9837809441955	24.3104891468643	24.5205892177359	24.6840317175259	25.19254	24.47197	20	ACTBL2	>sp|Q562R1|ACTBL_HUMAN Beta-actin-like protein 2 OS=Homo sapiens GN=ACTBL2 PE=1 SV=2	0.72057	24.8322567192111	-3.21698440608648	0.00493764550663753	0.113460841942063	-2.0643910007433	9	9	+	-	-
>tr|K7EQ71|K7EQ71_HUMAN Periplakin (Fragment) OS=Homo sapiens GN=PPL PE=1 SV=1	21.6221993247881	21.877410621227	21.6064681720282	21.0227735995893	21.8485514875303	21.1011573027402	22.0014394255239	21.6858512219088	21.6960439840777	20.6405990157982	20.5011513100667	20.1257564363028	20.2278610900417	20.7514213500736	20.301215209079	21.5921297536033	21.6182082036542	21.6609711175173	21.60688	20.82437	61	PPL	>tr|K7EQ71|K7EQ71_HUMAN Periplakin (Fragment) OS=Homo sapiens GN=PPL PE=1 SV=1	0.782509	21.2156227014195	-3.2160560609671	0.00494761641951561	0.113460841942063	-2.06621625283575	9	9	-	-	+
>sp|O95670|VATG2_HUMAN V-type proton ATPase subunit G 2 OS=Homo sapiens GN=ATP6V1G2 PE=2 SV=1	12.6955218954773	12.6955218954773	12.6955218954773	19.1850659680626	18.7495671492887	18.5637199158652	17.7227454773788	17.4056798573885	17.5115777276638	16.7443711227228	12.6955218954773	12.6955218954773	12.7215862908649	12.6955218954773	12.6955218954773	12.6955218954773	12.6955218954773	12.6955218954773	16.35832	13.14829	5	ATP6V1G2	>sp|O95670|VATG2_HUMAN V-type proton ATPase subunit G 2 OS=Homo sapiens GN=ATP6V1G2 PE=2 SV=1	3.21003	14.7533073591116	-3.21342060364349	0.00497603046663168	0.113460841942063	-2.07139735420077	9	9	-	-	-
>tr|F2Z307|F2Z307_HUMAN Protein ATP6V1G2-DDX39B OS=Homo sapiens GN=ATP6V1G2-DDX39B PE=4 SV=1	12.6955218954773	12.6955218954773	12.6955218954773	19.1850659680626	18.7495671492887	18.5637199158652	17.7227454773788	17.4056798573885	17.5115777276638	16.7443711227228	12.6955218954773	12.6955218954773	12.7215862908649	12.6955218954773	12.6955218954773	12.6955218954773	12.6955218954773	12.6955218954773	16.35832	13.14829	5	ATP6V1G2-DDX39B	>tr|F2Z307|F2Z307_HUMAN Protein ATP6V1G2-DDX39B OS=Homo sapiens GN=ATP6V1G2-DDX39B PE=4 SV=1	3.21003	14.7533073591116	-3.21342060364349	0.00497603046663168	0.113460841942063	-2.07139735420077	9	9	-	-	-
>sp|Q14527|HLTF_HUMAN Helicase-like transcription factor OS=Homo sapiens GN=HLTF PE=1 SV=2	18.7345873421546	18.3792153293499	18.5866487502155	19.0302075024395	19.039892565662	19.2965200240108	18.676108389742	18.5228472702743	18.8110063176409	18.9610465104392	19.137997337512	18.9890947465452	19.464102024361	18.937672657169	19.8980182568163	19.3990858843815	19.4574848321027	19.5394767650216	18.78634	19.30933	52	HLTF	>sp|Q14527|HLTF_HUMAN Helicase-like transcription factor OS=Homo sapiens GN=HLTF PE=1 SV=2	-0.522994	19.0478340281021	3.21015514155659	0.00501145919122544	0.113460841942063	-2.07781583259276	9	9	+	+	+
>tr|D6R9A6|D6R9A6_HUMAN High mobility group protein B2 (Fragment) OS=Homo sapiens GN=HMGB2 PE=1 SV=1	22.4697683238278	22.2853778359042	22.4094626664226	23.6664990856967	24.0958768683414	23.556151826175	22.8020873180933	22.0848049434115	22.8384668090576	22.298152477103	21.5039772938237	20.6417736585665	21.103603089791	22.6460249187615	21.3125133035366	21.7939791369832	22.5844546149959	22.6097798153721	22.91206	21.8327	5	HMGB2	>tr|D6R9A6|D6R9A6_HUMAN High mobility group protein B2 (Fragment) OS=Homo sapiens GN=HMGB2 PE=1 SV=1	1.07936	22.3723752214369	-3.20924070841653	0.0050214246639653	0.113460841942063	-2.07961297885492	9	9	+	-	+
>tr|B1AR63|B1AR63_HUMAN Hexokinase (Fragment) OS=Homo sapiens GN=HK1 PE=1 SV=6	15.8299089710697	14.2634007541943	16.0746687957762	16.2582418812209	16.4563913194076	16.2026637177005	15.5436803218767	15.9902762625489	15.5129075241849	16.5742659582148	14.2406005099658	16.0417801994534	12.7215862908649	12.6955218954773	12.6955218954773	14.3410238708419	14.1855175234237	14.1903737534573	15.79246	14.18735	13	HK1	>tr|B1AR63|B1AR63_HUMAN Hexokinase (Fragment) OS=Homo sapiens GN=HK1 PE=1 SV=6	1.60511	14.9899073025087	-3.19786153551818	0.00514707352011637	0.115242714491035	-2.10196804096348	9	9	-	-	-
>sp|Q6ZT21|TMPPE_HUMAN Transmembrane protein with metallophosphoesterase domain OS=Homo sapiens GN=TMPPE PE=2 SV=2	13.9245434485798	13.447744671246	14.5960690309173	15.5246889692944	16.0306190209577	15.851555068358	12.6955218954773	12.6955218954773	12.6955218954773	12.6955218954773	12.6955218954773	12.8696466490061	12.7215862908649	12.6955218954773	12.6955218954773	12.6955218954773	12.6955218954773	12.6955218954773	14.16242	12.71777	14	TMPPE	>sp|Q6ZT21|TMPPE_HUMAN Transmembrane protein with metallophosphoesterase domain OS=Homo sapiens GN=TMPPE PE=2 SV=2	1.44466	13.4400928946665	-3.19780286203883	0.00514772932164567	0.115242714491035	-2.10208326711591	9	9	-	-	-
>sp|Q309B1|TR16L_HUMAN Tripartite motif-containing protein 16-like protein OS=Homo sapiens GN=TRIM16L PE=2 SV=3	15.0325444116622	12.7299297736204	14.9422222250986	15.4753700317294	15.6592814519278	15.6401975376041	14.3106215538066	14.0645562189547	15.535975921849	15.512102283639	15.9029474644434	16.1315018217028	17.0165675548893	16.5639666262796	14.6582008636531	16.7577159240842	15.7189824340342	16.5947706474119	14.82119	16.0952	17	TRIM16L	>sp|Q309B1|TR16L_HUMAN Tripartite motif-containing protein 16-like protein OS=Homo sapiens GN=TRIM16L PE=2 SV=3	-1.27401	15.458191930355	3.1927243263551	0.00520480454551446	0.115773615959654	-2.11205514456682	9	9	+	-	-
>tr|V9GYN9|V9GYN9_HUMAN Structural maintenance of chromosomes protein 1A OS=Homo sapiens GN=SMC1A PE=1 SV=1	18.4337725603937	17.515801887777	17.7967682504574	17.1605818263914	15.5334253580287	17.3086027232682	19.954736612049	19.9415728882525	18.8289658458938	19.8852849937432	19.906657100784	17.9027859040221	18.8819933710135	19.6566903317821	19.8552901109205	20.9511993742673	20.6723964769388	20.5467876655001	18.05269	19.80657	3	SMC1A	>tr|V9GYN9|V9GYN9_HUMAN Structural maintenance of chromosomes protein 1A OS=Homo sapiens GN=SMC1A PE=1 SV=1	-1.75387	18.929628515638	3.19146025818194	0.00521910701835408	0.115773615959654	-2.11453668384479	9	9	+	-	+
>sp|Q8N3U4|STAG2_HUMAN Cohesin subunit SA-2 OS=Homo sapiens GN=STAG2 PE=1 SV=3	14.9351367930825	16.0108092411415	16.173984554488	14.8648353603367	15.4201604966494	14.9222984912353	15.7088854525231	15.3303563140744	16.9052961791364	16.7896066432417	16.3794342184002	16.6305530393708	16.2530872534294	16.1292197511073	15.7922180780849	17.0576427034968	16.7389527379322	16.160467869003	15.58575	16.4368	59	STAG2	>sp|Q8N3U4|STAG2_HUMAN Cohesin subunit SA-2 OS=Homo sapiens GN=STAG2 PE=1 SV=3	-0.851047	16.0112747320408	3.18905253298532	0.00524645628753168	0.115851293840131	-2.11926282275072	9	9	-	+	+
>tr|E9PIG5|E9PIG5_HUMAN Rho-related GTP-binding protein RhoD OS=Homo sapiens GN=RHOD PE=1 SV=2	18.4830148597344	18.3835525800902	18.2111362951217	16.7523569724355	17.6657736204166	16.7134232141589	17.3643507665748	17.2497445991753	17.0399941165675	17.6306748661197	17.6343892688207	12.6955218954773	12.7215862908649	12.6955218954773	12.6955218954773	12.6955218954773	17.4045957016572	17.4314697595848	17.54037	14.84498	8	RHOD	>tr|E9PIG5|E9PIG5_HUMAN Rho-related GTP-binding protein RhoD OS=Homo sapiens GN=RHOD PE=1 SV=2	2.69539	16.1926750274017	-3.18695439714388	0.00527040352749298	0.115853485685796	-2.12338067004227	9	9	-	+	-
>sp|P49756|RBM25_HUMAN RNA-binding protein 25 OS=Homo sapiens GN=RBM25 PE=1 SV=3	18.1819414283119	17.6701721525035	17.9033092346225	21.1831951142555	21.0627941967108	21.2500573922332	19.3077454738705	19.6006360095002	19.3416319167075	17.3531319336899	17.7473069732223	17.7623552092657	16.5222233463859	18.9394378687028	17.9221012961863	17.7297520930157	19.1512356275206	17.2386348805552	19.50016	17.81846	26	RBM25	>sp|P49756|RBM25_HUMAN RNA-binding protein 25 OS=Homo sapiens GN=RBM25 PE=1 SV=3	1.6817	18.6593145637367	-3.18163177599537	0.00533163564086249	0.116109427923923	-2.13382445456574	9	9	+	-	+
>tr|K7EQ72|K7EQ72_HUMAN Calponin-1 (Fragment) OS=Homo sapiens GN=CNN1 PE=1 SV=1	18.1771198419173	18.3664685973377	17.7802456353946	16.3739078903079	17.0629640039439	16.5394174007695	18.3373564278795	18.3170932654706	18.8785157240358	18.56447002079	18.7475112150429	19.3389252514255	18.6907906541931	19.2376182949091	17.8400344483462	18.8589089827711	18.941976443734	19.0020143125224	17.75923	18.80247	7	CNN1	>tr|K7EQ72|K7EQ72_HUMAN Calponin-1 (Fragment) OS=Homo sapiens GN=CNN1 PE=1 SV=1	-1.04324	18.2808521339329	3.18057627620112	0.00534386086665743	0.116109427923923	-2.13589507445425	9	9	-	-	-
>sp|Q92466|DDB2_HUMAN DNA damage-binding protein 2 OS=Homo sapiens GN=DDB2 PE=1 SV=1	13.3748199741929	13.3796214315385	13.3796214315385	12.4053047231579	12.6955218954773	12.5155774469272	14.3134839688782	13.576811778183	14.0881700411086	14.751127330353	14.6940363419956	14.2406005099658	14.4951564194807	14.9574710416409	12.6955218954773	14.1940615163236	13.9801577583742	14.7561421891155	13.30321	14.30714	19	DDB2	>sp|Q92466|DDB2_HUMAN DNA damage-binding protein 2 OS=Homo sapiens GN=DDB2 PE=1 SV=1	-1.00393	13.8051782052071	3.17972430043149	0.00535374883799067	0.116109427923923	-2.13756632821498	9	9	-	-	-
>sp|Q8N357|S35F6_HUMAN Solute carrier family 35 member F6 OS=Homo sapiens GN=SLC35F6 PE=1 SV=1	16.563302517701	18.2676005140314	17.2143754314686	16.2273163530646	18.2528838396275	16.7754959004101	17.5626471393791	14.8197575295325	16.9310373299532	15.402792486339	16.0387840178974	16.3270858668024	12.7215862908649	16.6055761892789	12.6955218954773	15.086488150579	15.9810668044008	15.1281366490046	16.95716	15.10967	12	SLC35F6	>sp|Q8N357|S35F6_HUMAN Solute carrier family 35 member F6 OS=Homo sapiens GN=SLC35F6 PE=1 SV=1	1.84749	16.033414161434	-3.16902865768097	0.00547941815391613	0.118017498655772	-2.15853914896804	9	9	-	-	-
>sp|P80723|BASP1_HUMAN Brain acid soluble protein 1 OS=Homo sapiens GN=BASP1 PE=1 SV=2	18.0315329289634	18.1570072013317	18.0670729103643	17.5900709455437	18.0426207350887	18.4215089048051	17.8157473950229	16.7409962780501	18.2965497599361	17.6101610946449	17.6478938683559	17.3038967365378	15.5966288621032	17.3086027232682	16.3393967336586	13.422886667564	16.0209413077453	16.6561817120926	17.90701	16.43407	11	BASP1	>sp|P80723|BASP1_HUMAN Brain acid soluble protein 1 OS=Homo sapiens GN=BASP1 PE=1 SV=2	1.47295	17.1705387091709	-3.16811251484481	0.00549031591111659	0.118017498655772	-2.16033489830281	9	9	+	-	+
>tr|B0QZ36|B0QZ36_HUMAN mRNA export factor (Fragment) OS=Homo sapiens GN=RAE1 PE=1 SV=1	12.6955218954773	16.8154539200665	16.4215650864312	17.3259149235293	17.1004401559866	16.9975466253594	14.5117295603626	12.6955218954773	12.6955218954773	17.8008669587059	17.4630040010279	17.413050816067	18.0205707394503	16.0788636973173	17.3900260061357	17.7165013109744	17.4957463383624	17.650693004023	15.25102	17.4477	6	RAE1	>tr|B0QZ36|B0QZ36_HUMAN mRNA export factor (Fragment) OS=Homo sapiens GN=RAE1 PE=1 SV=1	-2.19668	16.3493632683462	3.16577258152437	0.00551824652332779	0.118095337490425	-2.16492094687515	9	9	+	-	+
>tr|H0Y7W6|H0Y7W6_HUMAN Formin-binding protein 1 (Fragment) OS=Homo sapiens GN=FNBP1 PE=1 SV=2	17.1289009099539	16.7127573022373	16.900377892798	13.7603167721792	14.7774907422332	14.2667616310364	18.6924144777264	18.7822619959028	18.7445590058701	18.2373915916355	20.0022003432163	19.6389393273264	15.8349233030004	19.2424121741068	18.8551815928983	19.716696546339	20.0398770144935	20.0633923288404	16.64065	19.07011	24	FNBP1	>tr|H0Y7W6|H0Y7W6_HUMAN Formin-binding protein 1 (Fragment) OS=Homo sapiens GN=FNBP1 PE=1 SV=2	-2.42946	17.8553808306552	3.16205980870781	0.00556285000473017	0.118475080218016	-2.17219615017149	9	9	-	-	-
>tr|C9J470|C9J470_HUMAN Condensin complex subunit 2 (Fragment) OS=Homo sapiens GN=NCAPH PE=1 SV=6	19.3267403180036	19.7342703733719	19.3705411161156	18.8854264972833	18.7464903941656	18.8779518098606	18.9283521238725	18.2585624612309	18.9642778603305	19.7471810790563	19.5080702327856	19.7904732090254	19.5408963793096	20.0545074939437	19.6052295903475	19.5581794312526	19.1455373220962	19.2915882526762	19.01029	19.58241	29	NCAPH	>tr|C9J470|C9J470_HUMAN Condensin complex subunit 2 (Fragment) OS=Homo sapiens GN=NCAPH PE=1 SV=6	-0.572117	19.296348663596	3.16024620271913	0.00558476602921482	0.118475080218016	-2.17574925959167	9	9	+	+	+
>sp|P52823|STC1_HUMAN Stanniocalcin-1 OS=Homo sapiens GN=STC1 PE=1 SV=1	19.3282533287393	19.3596248987166	18.2882258486979	19.0886008859809	19.3334335892047	19.1360866955037	18.81658212269	18.0262245168093	18.6913167277918	18.2402846324787	20.1446727892412	17.6869500980296	15.2590205557727	15.5667107711862	15.8911363528639	17.5939999870883	16.6694545467681	18.0825799070757	18.89648	17.2372	12	STC1	>sp|P52823|STC1_HUMAN Stanniocalcin-1 OS=Homo sapiens GN=STC1 PE=1 SV=1	1.65928	18.0668421252577	-3.14888296945002	0.00572401966337419	0.119843754159432	-2.19800141809133	9	9	+	-	+
>tr|M0QYL3|M0QYL3_HUMAN Heterogeneous nuclear ribonucleoprotein M (Fragment) OS=Homo sapiens GN=HNRNPM PE=1 SV=1	23.3382393756254	23.0109485361402	23.1551091836991	22.7216649366197	22.7696472029797	22.9932410918689	23.1386049023106	22.5438625070986	23.2924369611	23.1583463070231	23.3713104591954	23.100752594335	23.3816801542051	23.6479193696235	23.3334793582524	23.5872627059663	23.6001159192861	23.8180612489709	22.99597	23.44433	5	HNRNPM	>tr|M0QYL3|M0QYL3_HUMAN Heterogeneous nuclear ribonucleoprotein M (Fragment) OS=Homo sapiens GN=HNRNPM PE=1 SV=1	-0.448353	23.2201490452389	3.14784174592058	0.0057369483734531	0.119843754159432	-2.20003953272077	9	9	-	+	+
>sp|P29350|PTN6_HUMAN Tyrosine-protein phosphatase non-receptor type 6 OS=Homo sapiens GN=PTPN6 PE=1 SV=1	19.016356960286	18.4927347030666	18.4286498070107	17.9209636593447	17.8602805799495	17.9893652317481	17.6934753078095	17.8134382765932	17.244868679863	17.0354684687999	17.5351104472893	16.9649388414552	17.72136339848	18.1059974156408	17.0076080685372	16.4095496664338	16.710483638729	17.7112633907768	18.05113	17.24464	34	PTPN6	>sp|P29350|PTN6_HUMAN Tyrosine-protein phosphatase non-receptor type 6 OS=Homo sapiens GN=PTPN6 PE=1 SV=1	0.806483	17.647884252323	-3.14506629832873	0.00577155052244705	0.119843754159432	-2.20547153614885	9	9	+	+	+
>tr|J3QQZ4|J3QQZ4_HUMAN Mannose-P-dolichol utilization defect 1 protein (Fragment) OS=Homo sapiens GN=MPDU1 PE=1 SV=1	19.6379919252454	19.7196068372031	19.3381912958025	20.4286818187069	20.3441207654819	20.2578793177216	19.1184776325046	18.8779518098606	19.0979830316881	19.2835374979925	19.5146324213132	19.8918628587512	16.9369017096829	16.5799718779772	15.5709900043351	18.6323159726124	18.0257122448372	18.000377618018	19.64676	18.04848	6	MPDU1	>tr|J3QQZ4|J3QQZ4_HUMAN Mannose-P-dolichol utilization defect 1 protein (Fragment) OS=Homo sapiens GN=MPDU1 PE=1 SV=1	1.59829	18.8476214799852	-3.14445739359492	0.00577916916695319	0.119843754159432	-2.20666312139059	9	9	-	+	-
>sp|Q01581|HMCS1_HUMAN Hydroxymethylglutaryl-CoA synthase, cytoplasmic OS=Homo sapiens GN=HMGCS1 PE=1 SV=2	15.3460544554699	15.3266245639191	15.280083739142	14.2350257510584	12.391372650028	12.6955218954773	12.6955218954773	14.5849956433826	14.4670907641641	15.314737476919	15.135163198217	14.6181163158777	15.1393639957006	15.6453462218454	15.6482326973884	15.4141740198039	16.143383874319	15.8858459796741	14.11359	15.43826	25	HMGCS1	>sp|Q01581|HMCS1_HUMAN Hydroxymethylglutaryl-CoA synthase, cytoplasmic OS=Homo sapiens GN=HMGCS1 PE=1 SV=2	-1.32467	14.7759252854369	3.14385483156545	0.00578671814366638	0.119843754159432	-2.20784224447181	9	9	+	-	+
>sp|Q96ET8|TV23C_HUMAN Golgi apparatus membrane protein TVP23 homolog C OS=Homo sapiens GN=TVP23C PE=1 SV=3	14.0264984831901	15.6491186510132	14.9613248643049	15.7722199166282	16.0897019327601	15.5799493259369	12.6955218954773	12.6955218954773	12.6955218954773	13.7173006076375	13.3475384043107	13.1436787482651	12.7215862908649	12.6955218954773	12.6955218954773	12.6955218954773	12.6955218954773	12.6955218954773	14.46282	12.93419	16	TVP23C	>sp|Q96ET8|TV23C_HUMAN Golgi apparatus membrane protein TVP23 homolog C OS=Homo sapiens GN=TVP23C PE=1 SV=3	1.52863	13.6985051327072	-3.14273467160564	0.00580077731822716	0.119843754159432	-2.21003409655759	9	9	-	-	-
>tr|K7EKM4|K7EKM4_HUMAN Spermidine synthase OS=Homo sapiens GN=SRM PE=1 SV=1	14.9382535846694	16.578582032246	17.2657152054436	12.6955218954773	12.6955218954773	12.6955218954773	15.9076613937453	15.7582236977143	15.6375796082082	15.2565848569104	16.6267974265722	16.094871419948	20.2087013225583	21.3333736016955	21.2642068232632	16.7003829263278	16.9258192246357	16.5472361919749	14.90806	17.88422	5	SRM	>tr|K7EKM4|K7EKM4_HUMAN Spermidine synthase OS=Homo sapiens GN=SRM PE=1 SV=1	-2.97615	16.3961419445747	3.14105123439027	0.0058219691193137	0.119843754159432	-2.21332780707289	9	9	-	-	-
>tr|F5H1W3|F5H1W3_HUMAN Septin-10 OS=Homo sapiens GN=SEPT10 PE=1 SV=1	16.6293020104438	18.4049902521717	16.7207499827559	18.4593279132415	18.0074105109024	18.2484820372823	16.0123874524099	16.3443440326145	17.9243798083647	21.3317583787028	20.1538013238561	16.9079600340288	19.5402227720523	17.8539402310672	18.2269052916409	18.9349142684335	19.2055069910731	19.4368406311852	17.41682	19.06576	3	SEPT10	>tr|F5H1W3|F5H1W3_HUMAN Septin-10 OS=Homo sapiens GN=SEPT10 PE=1 SV=1	-1.64894	18.2412902179015	3.13421048222652	0.00590886568173737	0.121119280514262	-2.22670798203026	9	9	-	-	-
>tr|G3V3T7|G3V3T7_HUMAN Cleavage and polyadenylation-specificity factor subunit 2 (Fragment) OS=Homo sapiens GN=CPSF2 PE=1 SV=1	19.5811687966948	18.0332346603374	18.0599280289085	18.7260725851005	18.159768688428	18.4996585260804	18.1117167989755	17.8343906696988	17.918600018919	16.9625981973579	16.0857221053336	18.7953139115402	12.7215862908649	12.6955218954773	12.6955218954773	18.115034421442	18.4231775749485	14.7309231878295	18.32495	15.69171	3	CPSF2	>tr|G3V3T7|G3V3T7_HUMAN Cleavage and polyadenylation-specificity factor subunit 2 (Fragment) OS=Homo sapiens GN=CPSF2 PE=1 SV=1	2.63324	17.0083299029674	-3.13221064027754	0.00593450813374333	0.121133783671114	-2.23061834733713	9	9	-	+	-
>tr|Q5T1B5|Q5T1B5_HUMAN Type I inositol 1,4,5-trisphosphate 5-phosphatase OS=Homo sapiens GN=INPP5A PE=1 SV=1	19.975629637127	20.6075217676819	19.5640535816952	20.0689924087558	20.1880134270925	19.9535059378333	20.6212643396129	21.933553530418	22.1509551443497	13.6105068426902	12.412472066533	20.2678428763628	20.8924181927208	20.4311931183397	20.3495401070973	15.9174077978569	14.7660830523906	12.9956789686927	20.56261	16.84924	22	INPP5A	>tr|Q5T1B5|Q5T1B5_HUMAN Type I inositol 1,4,5-trisphosphate 5-phosphatase OS=Homo sapiens GN=INPP5A PE=1 SV=1	3.71337	18.7059240442917	-3.12874737439056	0.00597917275701291	0.121216767985664	-2.23738887723363	9	9	-	+	-
>tr|I3L0K2|I3L0K2_HUMAN Thioredoxin domain-containing protein 17 OS=Homo sapiens GN=TXNDC17 PE=1 SV=1	19.3322945116422	18.0185607188937	17.9925704883642	17.6399327389292	19.3208117419385	19.4214405279263	17.9018771596221	18.1234037165998	17.9428184236284	17.6044591458917	14.2775459434634	17.8510855864174	20.01226972313	14.9033068606707	17.5329764839242	14.0770475593519	14.5967719176148	14.032603808101	18.41041	16.09867	5	TXNDC17	>tr|I3L0K2|I3L0K2_HUMAN Thioredoxin domain-containing protein 17 OS=Homo sapiens GN=TXNDC17 PE=1 SV=1	2.31174	17.2545431697839	-3.12802906745663	0.00598847762794554	0.121216767985664	-2.23879292444258	9	9	-	-	-
>sp|P15144|AMPN_HUMAN Aminopeptidase N OS=Homo sapiens GN=ANPEP PE=1 SV=4	21.4046624391502	21.5088831723193	21.6221993247881	22.0816772203709	22.4756659072319	22.2561903332044	20.893490938965	20.8709365652244	20.9101813361716	20.5707464420038	20.6471425036404	20.9420399587401	21.2081318794438	21.1810608548951	21.0877362475888	20.2812631661849	20.9830544487386	20.4209192232446	21.55821	20.81357	48	ANPEP	>sp|P15144|AMPN_HUMAN Aminopeptidase N OS=Homo sapiens GN=ANPEP PE=1 SV=4	0.744644	21.1858878867726	-3.12046240572126	0.00608735995788125	0.122707031848079	-2.25357876256301	9	9	-	-	-
>tr|U3KQS7|U3KQS7_HUMAN U6 snRNA-associated Sm-like protein LSm4 (Fragment) OS=Homo sapiens GN=LSM4 PE=1 SV=1	19.1772166800174	18.7986504773262	19.0045373166285	19.1461712882119	18.76932827679	18.9022407337826	19.9312865897048	20.0155064539314	20.1719172839507	14.6746638040005	16.3068142636078	19.8602077719319	17.3413407604617	18.611542553021	18.3863932813536	18.0238542030315	17.8197601878575	18.4424611898664	19.3241	17.71856	5	LSM4	>tr|U3KQS7|U3KQS7_HUMAN U6 snRNA-associated Sm-like protein LSm4 (Fragment) OS=Homo sapiens GN=LSM4 PE=1 SV=1	1.60554	18.5213273953042	-3.10913986288013	0.0062383138469807	0.123403016838049	-2.27568860746057	9	9	-	-	-
>tr|E5RI01|E5RI01_HUMAN Double-strand-break repair protein rad21 homolog OS=Homo sapiens GN=RAD21 PE=1 SV=1	18.556722071671	18.5674544443065	18.6278815396419	17.8677243908938	17.7158928887842	17.7946810133061	18.7280342584947	18.7947553733465	18.6110521185481	16.9214285481864	16.8162503414727	15.0623008434588	17.6296587373228	17.7390110271122	16.6487723772647	18.0562040289938	18.1164750688815	18.1932551790727	18.36269	17.2426	6	RAD21	>tr|E5RI01|E5RI01_HUMAN Double-strand-break repair protein rad21 homolog OS=Homo sapiens GN=RAD21 PE=1 SV=1	1.12009	17.8026419028199	-3.1057027602637	0.00628485759551697	0.123403016838049	-2.28239666502983	9	9	-	+	+
>tr|E9PP23|E9PP23_HUMAN Lysosomal acid phosphatase (Fragment) OS=Homo sapiens GN=ACP2 PE=1 SV=1	17.5233309161722	17.5387323320454	18.0614446280854	18.0819866020748	17.9469616315643	17.3307460415698	16.5261349988014	16.3007211450843	16.3951674056642	13.704432399369	13.9079060122664	15.864951109816	16.1355689163578	17.0719308367098	17.0030082143227	16.4791186720604	16.2312885245348	16.3753444308228	17.30058	15.86373	12	ACP2	>tr|E9PP23|E9PP23_HUMAN Lysosomal acid phosphatase (Fragment) OS=Homo sapiens GN=ACP2 PE=1 SV=1	1.43685	16.5821541565179	-3.10457672976488	0.00630017949574517	0.123403016838049	-2.28459391946421	9	9	-	+	-
>tr|H0YEQ8|H0YEQ8_HUMAN Polyadenylate-binding protein 4 (Fragment) OS=Homo sapiens GN=PABPC4 PE=1 SV=1	23.9096469100308	23.572306162655	23.4822754797673	23.8582506702928	23.583804906722	22.7987506131624	23.79647411806	23.631495295394	23.6156067186827	24.0123449975301	23.9260157497829	24.3430026080634	24.7775357081644	23.6259658757538	24.2606458003004	24.0620345047361	23.9046786308035	24.0836716766596	23.58318	24.11066	7	PABPC4	>tr|H0YEQ8|H0YEQ8_HUMAN Polyadenylate-binding protein 4 (Fragment) OS=Homo sapiens GN=PABPC4 PE=1 SV=1	-0.527476	23.8469170236978	3.10415960095418	0.00630586463063872	0.123403016838049	-2.28540782735006	9	9	+	-	+
>sp|P04259|K2C6B_HUMAN Keratin, type II cytoskeletal 6B OS=Homo sapiens GN=KRT6B PE=1 SV=5	23.631495295394	23.8847145556221	22.8713131663351	24.3790999934264	23.8152403335317	24.5024886188878	24.3908922820271	24.4229067368906	24.1908707016375	23.5758727468371	23.4424143527329	22.8071297095462	23.7364454722305	23.266785103473	22.7313726523747	23.583804906722	23.7138133772637	22.8660940970068	24.00989	23.30264	28	KRT6B	>sp|P04259|K2C6B_HUMAN Keratin, type II cytoskeletal 6B OS=Homo sapiens GN=KRT6B PE=1 SV=5	0.707254	23.6562641167744	-3.10152672422124	0.00634186452372457	0.123403016838049	-2.29054454641333	9	9	-	-	-
>sp|O95573|ACSL3_HUMAN Long-chain-fatty-acid--CoA ligase 3 OS=Homo sapiens GN=ACSL3 PE=1 SV=3	20.2370231546071	19.8450059713922	20.3421307096489	22.7573252803845	22.2822237112775	22.6825639248177	19.3193889644964	19.7224037421	19.3799664547509	20.065461246628	19.3228432762482	19.4611212633185	19.6076633699789	19.0146963035005	19.1839286751057	18.3077746802061	18.4241753796829	19.3198765210719	20.72978	19.18973	34	ACSL3	>sp|O95573|ACSL3_HUMAN Long-chain-fatty-acid--CoA ligase 3 OS=Homo sapiens GN=ACSL3 PE=1 SV=3	1.54005	19.9597540349564	-3.10027997028516	0.00635898165579929	0.123403016838049	-2.29297659671803	9	9	-	+	-
>sp|P31949|S10AB_HUMAN Protein S100-A11 OS=Homo sapiens GN=S100A11 PE=1 SV=2	22.9756698399222	21.8084002222424	22.5313738642117	22.8248407499469	22.9739927170489	23.654654105473	21.3535257097494	21.7776561915563	21.1246842146786	21.8255117121887	20.4396530921125	20.9854044844965	21.9410432634564	22.3955505171951	20.3640851824311	19.7171954106795	21.4737364095075	20.7402630408905	22.33609	21.09805	5	S100A11	>sp|P31949|S10AB_HUMAN Protein S100-A11 OS=Homo sapiens GN=S100A11 PE=1 SV=2	1.23804	21.7170689293215	-3.10021404517069	0.00635988802098278	0.123403016838049	-2.29310519085561	9	9	+	-	+
>tr|E7EU94|E7EU94_HUMAN U4/U6 small nuclear ribonucleoprotein Prp31 (Fragment) OS=Homo sapiens GN=PRPF31 PE=1 SV=6	18.3874334845949	18.1734368808999	18.100061600075	18.1290955222829	18.1372549227862	18.4593279132415	18.3067757156817	18.3869841680357	18.3020356757874	19.5282407298079	17.812387749377	18.713208707087	18.912779777105	19.0243479896281	18.7152791401415	18.8428808670247	18.7927729357276	18.802979673773	18.26471	18.79388	12	PRPF31	>tr|E7EU94|E7EU94_HUMAN U4/U6 small nuclear ribonucleoprotein Prp31 (Fragment) OS=Homo sapiens GN=PRPF31 PE=1 SV=6	-0.529164	18.5292935251698	3.09771103893685	0.00639439390195231	0.123403016838049	-2.29798710330011	9	9	-	-	+
>tr|A0A0A0MRE9|A0A0A0MRE9_HUMAN A-kinase anchor protein 9 OS=Homo sapiens GN=AKAP9 PE=1 SV=1	18.1812679948576	17.7427053160017	17.6848338338304	17.5082655331932	17.0095200950905	17.2293181307271	17.2634345610412	17.3495093294445	17.2980610353666	16.5947706474119	14.607867753186	17.2660721301985	16.005769449128	15.4666003631489	16.0710443150198	16.9460424995285	17.8008669587059	16.9492847422039	17.4741	16.41204	173	AKAP9	>tr|A0A0A0MRE9|A0A0A0MRE9_HUMAN A-kinase anchor protein 9 OS=Homo sapiens GN=AKAP9 PE=1 SV=1	1.06207	16.9430685937825	-3.09315260778162	0.00645770591186544	0.123403016838049	-2.30687557137339	9	9	-	-	-
>tr|E9PI87|E9PI87_HUMAN Oxidoreductase HTATIP2 OS=Homo sapiens GN=HTATIP2 PE=1 SV=1	16.2404730225266	17.5007545263485	16.8253146633923	16.9086386030311	17.3395679945844	16.8919832517842	16.8641047222376	16.8476307970923	15.6965694977344	18.5597323561913	18.8066836682042	16.5293935211984	17.4014595747928	17.6465825407422	17.6554744876341	17.5089705060962	17.8054385261817	17.2595824004444	16.79056	17.68592	13	HTATIP2	>tr|E9PI87|E9PI87_HUMAN Oxidoreductase HTATIP2 OS=Homo sapiens GN=HTATIP2 PE=1 SV=1	-0.895365	17.2382419255676	3.09302918868872	0.00645942856551256	0.123403016838049	-2.30711618281622	9	9	+	+	+
>tr|C9JTV5|C9JTV5_HUMAN Actin-related protein 2/3 complex subunit 2 (Fragment) OS=Homo sapiens GN=ARPC2 PE=1 SV=6	19.6618758727296	19.2931986443128	19.612772915053	18.9366148578451	18.8722486432442	19.3616415403069	18.4556994223033	18.5646754413671	18.6836366308715	19.1687265072847	19.8934782853745	19.7859318057098	19.9378804450185	19.6210563700568	20.5804751560411	19.8719423625288	19.1181987595664	19.5366445461379	19.04915	19.72381	6	ARPC2	>tr|C9JTV5|C9JTV5_HUMAN Actin-related protein 2/3 complex subunit 2 (Fragment) OS=Homo sapiens GN=ARPC2 PE=1 SV=6	-0.674663	19.3864832336529	3.09248091073142	0.00646708672390221	0.123403016838049	-2.30818504952003	9	9	+	-	-
>tr|F5H303|F5H303_HUMAN Nucleolar complex protein 4 homolog (Fragment) OS=Homo sapiens GN=NOC4L PE=1 SV=1	12.6955218954773	12.6955218954773	13.5739275415723	12.6955218954773	12.6955218954773	12.6955218954773	15.8132008263431	14.5741778655312	14.5022280320848	16.6915064161716	14.9422222250986	15.0705795351201	14.7472255613568	15.1946734978976	12.6955218954773	14.9751640029393	16.3013179196846	16.1204769713143	13.54902	15.19319	16	NOC4L	>tr|F5H303|F5H303_HUMAN Nucleolar complex protein 4 homolog (Fragment) OS=Homo sapiens GN=NOC4L PE=1 SV=1	-1.64417	14.3711017648877	3.0904761285675	0.00649516441012963	0.123403016838049	-2.3120929856007	9	9	-	-	+
>tr|E9PHI6|E9PHI6_HUMAN Cytoplasmic dynein 1 light intermediate chain 1 OS=Homo sapiens GN=DYNC1LI1 PE=1 SV=1	19.2796445504903	19.2754717721259	19.2474537234539	19.3239135698863	19.273759344294	19.1560250009696	18.8896746973388	18.6807315321063	18.9694710417339	19.7029975826532	19.5112341128703	20.1190114957022	20.4603848693064	20.322174127449	19.5250970642443	19.708635327942	18.9899126825922	19.1598290471928	19.12179	19.72214	19	DYNC1LI1	>tr|E9PHI6|E9PHI6_HUMAN Cytoplasmic dynein 1 light intermediate chain 1 OS=Homo sapiens GN=DYNC1LI1 PE=1 SV=1	-0.600348	19.421967863464	3.08887322647237	0.00651769924997327	0.123403016838049	-2.31521710092956	9	9	+	+	-
>tr|H3BVI6|H3BVI6_HUMAN Calponin (Fragment) OS=Homo sapiens GN=CNN2 PE=1 SV=1	17.8956658735008	17.2137496402168	17.5023280588473	18.529220213534	17.9794737667544	18.3954676426787	18.5652082706527	18.0594190660567	18.5153041186545	18.3968615176074	18.6182358152302	17.9455166767699	18.5054492843402	19.2805124318287	18.9856892098534	21.0248192805482	21.0643957104564	20.8714878943638	18.07287	19.41033	13	CNN2	>tr|H3BVI6|H3BVI6_HUMAN Calponin (Fragment) OS=Homo sapiens GN=CNN2 PE=1 SV=1	-1.33746	18.7416002484386	3.08745298207221	0.0065377299379545	0.123403016838049	-2.31798488722981	9	9	-	+	-
>sp|Q02241|KIF23_HUMAN Kinesin-like protein KIF23 OS=Homo sapiens GN=KIF23 PE=1 SV=3	14.1714445659403	14.6664478124853	14.9848998004884	15.2443413854191	14.6396631931918	11.8611198653523	13.6769991551246	14.8614388733793	13.5373650899161	14.5187419667081	15.6461745296191	15.280083739142	14.8349626240961	15.7471282150348	14.8029544605145	16.3836249364378	16.0567265520733	15.3992245211074	14.18264	15.40774	46	KIF23	>sp|Q02241|KIF23_HUMAN Kinesin-like protein KIF23 OS=Homo sapiens GN=KIF23 PE=1 SV=3	-1.2251	14.7951856270017	3.08722622202797	0.00654093365248765	0.123403016838049	-2.31842677134454	9	9	-	-	+
>sp|Q8NHV4|NEDD1_HUMAN Protein NEDD1 OS=Homo sapiens GN=NEDD1 PE=1 SV=1	13.0283565870309	15.1833578364231	15.2621567648924	12.6955218954773	12.6955218954773	14.232817830749	15.8029536377751	14.6181163158777	13.5931132247572	16.1454122512265	16.1467064866095	15.7560229441409	15.202595296242	14.6241379927124	14.5769385969051	15.5194991436697	15.6353122593339	15.3453031649847	14.12355	15.4391	30	NEDD1	>sp|Q8NHV4|NEDD1_HUMAN Protein NEDD1 OS=Homo sapiens GN=NEDD1 PE=1 SV=1	-1.31556	14.7813246735714	3.08714481417613	0.00654208417405487	0.123403016838049	-2.31858540779343	9	9	-	-	-
>tr|S4R329|S4R329_HUMAN ER membrane protein complex subunit 4 OS=Homo sapiens GN=EMC4 PE=1 SV=1	20.065461246628	19.9203994189858	20.2766758493022	20.0787317257708	20.395221831572	20.4451187580463	19.6384477781728	19.5179276045944	19.5301116187154	18.9364433208165	20.0275927803391	18.8926594968924	19.664242766549	17.8956658735008	19.050817338324	20.3660974709049	18.4967534350166	18.3213087537191	19.98534	19.0724	4	EMC4	>tr|S4R329|S4R329_HUMAN ER membrane protein complex subunit 4 OS=Homo sapiens GN=EMC4 PE=1 SV=1	0.912946	19.5288709482139	-3.08632218315266	0.00655372135533482	0.123403016838049	-2.32018838219486	9	9	-	-	-
>sp|Q96NR8|RDH12_HUMAN Retinol dehydrogenase 12 OS=Homo sapiens GN=RDH12 PE=1 SV=3	20.1098719386139	18.7386492996892	18.6834456447696	18.97567691766	18.9001985359162	19.1669025058897	19.8790238361142	18.3084612377099	20.0147918346262	19.0483224369002	17.4009857395133	17.0987864561691	18.2953563255651	14.912881210271	17.7539876698615	13.2119497356278	17.4403361528039	19.260158500427	19.19745	17.15808	17	RDH12	>sp|Q96NR8|RDH12_HUMAN Retinol dehydrogenase 12 OS=Homo sapiens GN=RDH12 PE=1 SV=3	2.03936	18.1777658876738	-3.08179330504622	0.00661815109240814	0.124135050219764	-2.32901149823695	9	9	-	-	-
>tr|H7BY98|H7BY98_HUMAN Transcription initiation factor TFIID subunit 1 (Fragment) OS=Homo sapiens GN=TAF1 PE=1 SV=1	14.5449343342914	15.202595296242	14.9751640029393	16.0930854784211	16.2266420513184	15.9310197331944	12.6955218954773	14.3532957286016	14.6785180500821	13.4137308355783	12.6955218954773	15.7625766763153	12.7215862908649	12.6955218954773	12.6955218954773	14.9687636639706	12.6955218954773	12.6955218954773	14.96675	13.37159	18	TAF1	>tr|H7BY98|H7BY98_HUMAN Transcription initiation factor TFIID subunit 1 (Fragment) OS=Homo sapiens GN=TAF1 PE=1 SV=1	1.59517	14.1691690841491	-3.06902735602782	0.00680311121640027	0.127113516497202	-2.35386514619933	9	9	-	-	+
>sp|P53621|COPA_HUMAN Coatomer subunit alpha OS=Homo sapiens GN=COPA PE=1 SV=2	19.5055425835304	22.1234963308736	21.9457654605647	21.1840995163168	19.7778410438715	19.2568055188823	19.5471627477719	19.4868787274237	21.8127933099489	19.5800815518334	19.5206970050394	19.1621782401998	18.8562007848684	18.8681811241431	19.0433863115461	19.455173708313	19.3228432762482	19.5408963793096	20.5156	19.26107	63	COPA	>sp|P53621|COPA_HUMAN Coatomer subunit alpha OS=Homo sapiens GN=COPA PE=1 SV=2	1.25453	19.8883346455936	-3.06509926946479	0.00686103164441997	0.127704566009932	-2.36150755988244	9	9	+	+	-
>tr|J3KT38|J3KT38_HUMAN Growth factor receptor-bound protein 2 (Fragment) OS=Homo sapiens GN=GRB2 PE=1 SV=6	20.0646060523164	19.4657228819101	19.3170844496812	22.9666886139781	21.7882273232478	22.1279723517686	19.1135188733238	19.954736612049	21.3311492225378	17.8233923683467	18.1604604195776	19.3001245666051	19.4810139049906	19.6959534863965	19.4102856256004	20.1867117554812	18.9717727021753	18.9993229597772	20.68108	19.11434	6	GRB2	>tr|J3KT38|J3KT38_HUMAN Growth factor receptor-bound protein 2 (Fragment) OS=Homo sapiens GN=GRB2 PE=1 SV=6	1.56674	19.8977080094313	-3.05734395527525	0.00697680127571453	0.129363742738249	-2.37658907244799	9	9	+	-	+
>tr|U3KQN9|U3KQN9_HUMAN Uncharacterized protein (Fragment) OS=Homo sapiens PE=3 SV=1	17.3628910206356	17.8539402310672	17.0016737888907	17.0629640039439	17.3362768861588	17.3595844744079	15.4838898400309	15.4424552845368	15.5276659335885	13.9876719454368	14.135271355811	16.3858189346996	14.5361100441687	16.99442555221	15.8339246881313	15.3460544554699	15.2994913422885	15.552770210495	16.71459	15.34128	18	>tr|U3KQN9|U3KQN9_HUMAN Uncharacterized protein (Fragment) OS=Homo sapiens PE=3 SV=1	>tr|U3KQN9|U3KQN9_HUMAN Uncharacterized protein (Fragment) OS=Homo sapiens PE=3 SV=1	1.37331	16.0279377773317	-3.05152170238958	0.00706496450984	0.130207738444257	-2.38790518303629	9	9	-	-	-
>sp|Q9H4A6|GOLP3_HUMAN Golgi phosphoprotein 3 OS=Homo sapiens GN=GOLPH3 PE=1 SV=1	14.2279740551945	14.3709240276146	13.0430941643587	14.2831963801317	16.7398425849708	16.4387244460128	14.6675164634295	15.0792562896898	13.4172694873817	12.6955218954773	12.6955218954773	13.7373476589854	12.7215862908649	12.6955218954773	12.6955218954773	12.6955218954773	14.6128102894797	14.4833114625529	14.69642	13.22585	14	GOLPH3	>sp|Q9H4A6|GOLP3_HUMAN Golgi phosphoprotein 3 OS=Homo sapiens GN=GOLPH3 PE=1 SV=1	1.47057	13.9611368376696	-3.05080284391593	0.00707592485576037	0.130207738444257	-2.38930197996807	9	9	-	-	-
>tr|C9JXX7|C9JXX7_HUMAN Integrin alpha-6 (Fragment) OS=Homo sapiens GN=ITGA6 PE=1 SV=1	16.8696179330335	15.8162812712262	15.8112627772226	12.6955218954773	12.6955218954773	16.0870799142609	15.6602997245343	14.6419845677212	15.8020758333048	14.0543642514248	15.309015803606	14.5688277555139	12.7215862908649	12.6955218954773	12.6955218954773	12.6955218954773	12.6955218954773	12.6955218954773	15.11996	13.34793	10	ITGA6	>tr|C9JXX7|C9JXX7_HUMAN Integrin alpha-6 (Fragment) OS=Homo sapiens GN=ITGA6 PE=1 SV=1	1.77203	14.2339471883919	-3.04086394481433	0.00722917163281389	0.131525537532445	-2.40860552412344	9	9	-	-	-
>tr|G3V3Z8|G3V3Z8_HUMAN Protein numb homolog OS=Homo sapiens GN=NUMB PE=1 SV=1	19.6970043406941	19.4410445902399	19.3001245666051	17.9755910936659	17.7165013109744	18.5718841028852	19.2724892103805	18.6596816948574	19.6083264419036	19.1699810090469	18.6434388515794	17.9838518100531	18.015033373315	17.2724950387051	16.7750098273903	17.6904937340095	17.6927662923761	17.9143256988678	18.91585	17.90638	15	NUMB	>tr|G3V3Z8|G3V3Z8_HUMAN Protein numb homolog OS=Homo sapiens GN=NUMB PE=1 SV=1	1.00947	18.4111134993083	-3.04057015839685	0.00723375036802863	0.131525537532445	-2.40917587994067	9	9	-	-	+
>sp|Q5T749|KPRP_HUMAN Keratinocyte proline-rich protein OS=Homo sapiens GN=KPRP PE=1 SV=1	12.9947656985879	14.0693449842208	14.0560154904472	14.9910830645744	14.5942525718774	14.8197575295325	12.6955218954773	12.6955218954773	12.6955218954773	12.6559445819302	12.6955218954773	12.9451146802477	12.7215862908649	12.6955218954773	12.6955218954773	13.2775585599978	11.3562948465429	12.6882530103647	13.73464	12.63681	22	KPRP	>sp|Q5T749|KPRP_HUMAN Keratinocyte proline-rich protein OS=Homo sapiens GN=KPRP PE=1 SV=1	1.09783	13.1857279267807	-3.03974274548255	0.00724666100035921	0.131525537532445	-2.41078214091726	9	9	+	-	-
>tr|A0A0C4DGD2|A0A0C4DGD2_HUMAN Pre-mRNA-splicing factor SLU7 (Fragment) OS=Homo sapiens GN=SLU7 PE=1 SV=1	12.6955218954773	15.0417256044198	14.8635116512044	15.3898810039527	16.8129387965054	15.6683605612771	12.6955218954773	16.6902796854627	12.6955218954773	12.6955218954773	12.6955218954773	14.918456777324	12.7215862908649	12.6955218954773	12.6955218954773	12.6955218954773	12.6955218954773	12.6955218954773	14.72814	12.94541	6	SLU7	>tr|A0A0C4DGD2|A0A0C4DGD2_HUMAN Pre-mRNA-splicing factor SLU7 (Fragment) OS=Homo sapiens GN=SLU7 PE=1 SV=1	1.78273	13.8367755180991	-3.03915570864258	0.00725583451187636	0.131525537532445	-2.41192169115247	9	9	+	+	+
>sp|O15231|ZN185_HUMAN Zinc finger protein 185 OS=Homo sapiens GN=ZNF185 PE=1 SV=3	17.3986121264458	17.7777898202913	17.6758765676408	21.0662825012825	21.22936914342	21.2809535365195	17.9368175034965	17.8725386195605	17.8891275218732	17.6645456223794	18.0145478171528	17.0322670010366	16.7651792208623	16.4128510400786	16.7868682798607	16.7664782305469	17.5648385620309	17.2269488075442	18.90304	17.13717	36	ZNF185	>sp|O15231|ZN185_HUMAN Zinc finger protein 185 OS=Homo sapiens GN=ZNF185 PE=1 SV=3	1.76587	18.020105106779	-3.03480802727873	0.00732412803120661	0.132269940429746	-2.42035962086036	9	9	+	-	-
>sp|Q13442|HAP28_HUMAN 28 kDa heat- and acid-stable phosphoprotein OS=Homo sapiens GN=PDAP1 PE=1 SV=1	22.1757997974802	23.0980190383626	23.0479126787608	22.143934764588	22.2669261215736	22.0658693232747	22.587723023962	22.5794657776888	22.3767128733868	22.8366258253217	23.0623171866221	22.9001247354165	23.3427565177233	22.8551441300298	23.9046786308035	22.737173323415	22.826949641722	23.0214599120223	22.48248	23.05414	7	PDAP1	>sp|Q13442|HAP28_HUMAN 28 kDa heat- and acid-stable phosphoprotein OS=Homo sapiens GN=PDAP1 PE=1 SV=1	-0.571652	22.7683107390085	3.02963625177455	0.00740618228808015	0.133256420575901	-2.4303929124547	9	9	-	-	-
>tr|C9JN61|C9JN61_HUMAN Disks large homolog 1 (Fragment) OS=Homo sapiens GN=DLG1 PE=1 SV=1	12.6955218954773	15.3976366031267	14.7669539578068	17.0916182535249	16.8619696401548	16.9789293793322	12.6955218954773	12.6955218954773	12.6955218954773	12.6955218954773	12.6955218954773	12.6955218954773	12.7215862908649	12.6955218954773	12.6955218954773	12.6955218954773	12.6955218954773	12.6955218954773	14.65324	12.69842	5	DLG1	>tr|C9JN61|C9JN61_HUMAN Disks large homolog 1 (Fragment) OS=Homo sapiens GN=DLG1 PE=1 SV=1	1.95483	13.6758309372521	-3.02690636096384	0.00744985451454097	0.133450814334705	-2.435687148461	9	9	+	-	+
>tr|U3KQB3|U3KQB3_HUMAN Casein kinase I isoform gamma-1 OS=Homo sapiens GN=CSNK1G1 PE=3 SV=1	16.9277017098958	17.4025815901715	16.4743301645085	16.622555476204	16.8332206991973	16.8933065294545	15.0020369788184	14.9422222250986	15.0135099459708	13.4708987718612	13.5267870357622	15.8554730893475	12.4780985641034	16.5480161414265	15.4382001641379	14.7644447178419	14.7713480008817	15.0556088559966	16.23461	14.65654	25	CSNK1G1	>tr|U3KQB3|U3KQB3_HUMAN Casein kinase I isoform gamma-1 OS=Homo sapiens GN=CSNK1G1 PE=3 SV=1	1.57807	15.4455744811488	-3.02553256245539	0.0074719270273857	0.133450814334705	-2.43835096915694	9	9	+	-	-
>sp|P08779|K1C16_HUMAN Keratin, type I cytoskeletal 16 OS=Homo sapiens GN=KRT16 PE=1 SV=4	22.6213126104917	22.292501649984	22.3809207223416	24.3318278477328	24.3279872299358	24.4229067368906	21.9760302674433	21.845892541219	22.5409024836877	21.6334502682187	21.7544613426983	20.7467382887622	21.9279416691555	22.2834399238755	22.049030286136	21.8750211226979	21.4227020127115	22.4937052737192	22.97114	21.7985	25	KRT16	>sp|P08779|K1C16_HUMAN Keratin, type I cytoskeletal 16 OS=Homo sapiens GN=KRT16 PE=1 SV=4	1.17264	22.3848206820945	-3.02045091229547	0.00755412758606493	0.134074467410481	-2.44820165468532	9	9	-	-	+
>tr|U3KQA5|U3KQA5_HUMAN Uncharacterized protein OS=Homo sapiens PE=4 SV=1	17.1657869916468	17.6384398729092	16.7424483894807	16.8405669139221	17.0956479341743	17.1450637512499	15.2513214999096	15.2052739651011	15.2741692629041	13.720720858815	13.8489573706004	16.1342374775415	14.4833114625529	16.7754959004101	15.6498088965187	15.0740728090983	15.0438301404882	15.3251522638702	16.4843	15.11729	21	>tr|U3KQA5|U3KQA5_HUMAN Uncharacterized protein OS=Homo sapiens PE=4 SV=1	>tr|U3KQA5|U3KQA5_HUMAN Uncharacterized protein OS=Homo sapiens PE=4 SV=1	1.36701	15.8007947645107	-3.0199644360655	0.00756204283047998	0.134074467410481	-2.4491444538662	9	9	-	-	-
>tr|D6R970|D6R970_HUMAN Activated RNA polymerase II transcriptional coactivator p15 OS=Homo sapiens GN=SUB1 PE=1 SV=1	19.4150733974047	19.2031184328614	19.190094109882	21.0694651199168	20.8109686466511	20.8156079575493	12.6955218954773	12.6955218954773	19.5545928412581	19.5849768621769	12.6955218954773	18.8681811241431	12.7215862908649	12.6955218954773	12.6955218954773	12.6955218954773	12.6955218954773	12.6955218954773	18.38333	14.14976	3	SUB1	>tr|D6R970|D6R970_HUMAN Activated RNA polymerase II transcriptional coactivator p15 OS=Homo sapiens GN=SUB1 PE=1 SV=1	4.23357	16.2665466636959	-3.01469109099814	0.00764836296413753	0.134601532609884	-2.45936173724992	9	9	-	-	+
>tr|E5RK64|E5RK64_HUMAN Vesicle-associated membrane protein-associated protein B/C OS=Homo sapiens GN=VAPB PE=1 SV=1	21.6704962607808	22.9322135076269	22.826949641722	23.7334742939319	23.9137486699178	23.7934922592868	21.9457654605647	21.6971066962163	20.8109686466511	21.6011336226353	20.1578744315577	22.3714669748971	20.1856176203847	22.1195877706048	21.4744206470925	21.5379169383794	20.9635787417899	20.9674680480372	22.59158	21.26434	3	VAPB	>tr|E5RK64|E5RK64_HUMAN Vesicle-associated membrane protein-associated protein B/C OS=Homo sapiens GN=VAPB PE=1 SV=1	1.32724	21.9279600128931	-3.01186719219852	0.00769498132893157	0.134601532609884	-2.46483120904667	9	9	-	-	-
>sp|P30530|UFO_HUMAN Tyrosine-protein kinase receptor UFO OS=Homo sapiens GN=AXL PE=1 SV=3	10.8780683771903	12.6663568043953	12.7382167862754	17.0784318825898	16.8510932359771	16.6633959490671	18.3015144068311	18.1036694557791	11.7512672081306	18.7179686343958	19.1455373220962	18.4800251877856	17.0649931682131	17.8332310504142	18.1431126435169	16.2703142188511	18.0608233500724	17.9502696693511	15.00356	17.96292	39	AXL	>sp|P30530|UFO_HUMAN Tyrosine-protein kinase receptor UFO OS=Homo sapiens GN=AXL PE=1 SV=3	-2.95936	16.483238297274	3.01178233002935	0.00769638654876394	0.134601532609884	-2.46499555355215	9	9	-	-	-
>sp|P02538|K2C6A_HUMAN Keratin, type II cytoskeletal 6A OS=Homo sapiens GN=KRT6A PE=1 SV=3	23.5661538911924	23.848148681539	22.5952956594952	24.1771654332292	23.8811501172889	24.4465502344499	24.3398640637902	24.4071722750624	24.182150425173	23.4183329055226	23.3455799014066	22.6851385802707	23.5397397604342	23.1551091836991	22.6460249187615	23.5615872163333	23.7388302858601	22.7512735083187	23.93818	23.20462	28	KRT6A	>sp|P02538|K2C6A_HUMAN Keratin, type II cytoskeletal 6A OS=Homo sapiens GN=KRT6A PE=1 SV=3	0.733559	23.5714037245459	-3.01140733500532	0.00770259902543182	0.134601532609884	-2.46572175619271	9	9	-	+	+
>sp|Q9NRX1|PNO1_HUMAN RNA-binding protein PNO1 OS=Homo sapiens GN=PNO1 PE=1 SV=1	14.7271248542528	14.8017750154174	15.2328802335697	15.0448701854403	15.1393639957006	15.6647963673104	16.3443440326145	16.4122181204545	16.2300131576304	17.284960998639	17.8804391455725	15.1473967841545	16.6430271825954	16.4550718443333	16.7664782305469	16.9175488547321	16.3493311518208	15.6094053932887	15.51082	16.56152	12	PNO1	>sp|Q9NRX1|PNO1_HUMAN RNA-binding protein PNO1 OS=Homo sapiens GN=PNO1 PE=1 SV=1	-1.0507	16.0361691971152	3.00865587019267	0.00774833157040097	0.134881652365986	-2.47104941924332	9	9	-	-	+
>sp|Q53RD9|FBLN7_HUMAN Fibulin-7 OS=Homo sapiens GN=FBLN7 PE=2 SV=1	16.9551509053073	17.469162184478	17.3925709968377	14.7660830523906	14.9400928607104	14.7548492643341	14.2189088069036	17.7223973616169	17.4969208159562	14.3496818035586	14.583425365642	17.7179934757174	12.3200448666982	12.2169551333307	14.9848998004884	13.2008053481405	13.3961508404109	13.5463209631919	16.19068	14.03514	22	FBLN7	>sp|Q53RD9|FBLN7_HUMAN Fibulin-7 OS=Homo sapiens GN=FBLN7 PE=2 SV=1	2.15554	15.1129118803174	-3.00710897808209	0.00777415863780901	0.134881652365986	-2.47404410157013	9	9	-	-	-
>tr|Q5VZR0|Q5VZR0_HUMAN Golgi-associated plant pathogenesis-related protein 1 OS=Homo sapiens GN=GLIPR2 PE=1 SV=1	20.9017751484424	19.5957379358792	20.4004904837822	20.7128687522225	20.6685363492355	20.2169066475125	21.6828459676163	21.7352969042645	21.5514753506818	21.7090017775151	23.2924369611	21.010863824314	22.0003186817327	21.6828459676163	21.1594879780447	21.6876464024859	21.9098276424769	21.7110737528424	20.82955	21.79594	5	GLIPR2	>tr|Q5VZR0|Q5VZR0_HUMAN Golgi-associated plant pathogenesis-related protein 1 OS=Homo sapiens GN=GLIPR2 PE=1 SV=1	-0.966397	21.3127464737647	3.00399901335148	0.00782633666028061	0.135303713507627	-2.48006355358106	9	9	-	-	-
>tr|E9PHV6|E9PHV6_HUMAN Nuclear autoantigen Sp-100 OS=Homo sapiens GN=SP100 PE=1 SV=1	12.6955218954773	11.2656811414327	12.6955218954773	15.581618497147	12.6955218954773	12.6955218954773	14.1924018146618	14.3352255631055	14.0105982047256	15.3296038793956	15.7552973988715	12.6955218954773	16.3352022943146	14.4568904227759	15.0854753288623	15.2714481799913	15.2565848569104	14.375450475243	13.35196	14.95127	22	SP100	>tr|E9PHV6|E9PHV6_HUMAN Nuclear autoantigen Sp-100 OS=Homo sapiens GN=SP100 PE=1 SV=1	-1.59932	14.1516159741569	2.99854061695008	0.00791874085356274	0.13593501689606	-2.49062446706994	9	9	+	-	+
>sp|Q8IXH7|NELFD_HUMAN Negative elongation factor C/D OS=Homo sapiens GN=NELFCD PE=1 SV=2	19.3303721428628	18.8892527432008	19.4861524195099	18.0882466450307	17.6869500980296	19.4028657871932	19.9944965087781	20.1524368019935	20.1542875073968	20.2671385316222	19.8849563627135	18.9340135327205	21.5338149653232	20.378106457817	21.6182082036542	20.7938027126748	20.1477203662093	20.2636736411934	19.24278	20.4246	26	NELFCD	>sp|Q8IXH7|NELFD_HUMAN Negative elongation factor C/D OS=Homo sapiens GN=NELFCD PE=1 SV=2	-1.18182	19.8336941904402	2.9968955134286	0.00794679802356549	0.13593501689606	-2.49380640749344	9	9	-	+	+
>tr|H0UI80|H0UI80_HUMAN Negative elongation factor C/D OS=Homo sapiens GN=TH1L PE=1 SV=1	19.3303721428628	18.8892527432008	19.4861524195099	18.0882466450307	17.6869500980296	19.4028657871932	19.9944965087781	20.1524368019935	20.1542875073968	20.2671385316222	19.8849563627135	18.9340135327205	21.5338149653232	20.378106457817	21.6182082036542	20.7938027126748	20.1477203662093	20.2636736411934	19.24278	20.4246	26	TH1L	>tr|H0UI80|H0UI80_HUMAN Negative elongation factor C/D OS=Homo sapiens GN=TH1L PE=1 SV=1	-1.18182	19.8336941904402	2.9968955134286	0.00794679802356549	0.13593501689606	-2.49380640749344	9	9	-	-	+
>tr|E7ESS3|E7ESS3_HUMAN Transmembrane and ubiquitin-like domain-containing protein 2 OS=Homo sapiens GN=TMUB2 PE=1 SV=1	19.4100459974567	19.444743826383	19.1064032518482	17.8516259437972	17.5329764839242	17.441807776587	12.6955218954773	13.7312302511534	14.7144031198087	14.252293463755	14.4907675816325	18.8351944676856	12.7215862908649	12.6955218954773	12.6955218954773	12.6955218954773	12.6955218954773	12.6955218954773	16.88097	13.75305	8	TMUB2	>tr|E7ESS3|E7ESS3_HUMAN Transmembrane and ubiquitin-like domain-containing protein 2 OS=Homo sapiens GN=TMUB2 PE=1 SV=1	3.12792	15.3170116570978	-2.99362532424424	0.00800285835727192	0.135952724257976	-2.50013017595563	9	9	-	-	-
>sp|O60244|MED14_HUMAN Mediator of RNA polymerase II transcription subunit 14 OS=Homo sapiens GN=MED14 PE=1 SV=2	15.1289776546105	14.7621166504824	14.912881210271	14.0985441822573	15.7708712130777	16.0505165388964	16.9541624363331	16.8326616991555	15.3515329828067	16.3803041148272	16.278751937172	15.0354209444879	17.1032429622139	18.5328865910084	18.8562007848684	17.1475050139952	16.8915188510356	16.7267975493009	15.54025	16.99474	68	MED14	>sp|O60244|MED14_HUMAN Mediator of RNA polymerase II transcription subunit 14 OS=Homo sapiens GN=MED14 PE=1 SV=2	-1.45448	16.2674940731556	2.99357036127966	0.00800380385709781	0.135952724257976	-2.5002364453733	9	9	-	+	+
>sp|P17031|ZNF26_HUMAN Zinc finger protein 26 OS=Homo sapiens GN=ZNF26 PE=1 SV=3	15.1216276998245	13.2985360679246	14.8410671318372	15.7700758002492	16.8609425456356	16.7678390347308	13.4018870079347	13.7564413668066	14.4640712350719	12.631583211514	13.9893777525419	13.6063625674034	12.7215862908649	14.6274833207174	12.6955218954773	13.6371433516841	14.0060935166812	13.1707845469479	14.92028	13.45399	31	ZNF26	>sp|P17031|ZNF26_HUMAN Zinc finger protein 26 OS=Homo sapiens GN=ZNF26 PE=1 SV=3	1.46628	14.1871346857693	-2.98596020554544	0.00813577148257681	0.137712814851422	-2.51494537840913	9	9	-	-	+
>sp|P13645|K1C10_HUMAN Keratin, type I cytoskeletal 10 OS=Homo sapiens GN=KRT10 PE=1 SV=6	21.9361136699382	21.5843046083373	22.2129440487371	23.5907330997124	23.469891880733	23.6850249616069	22.6229947230989	22.2408620334111	22.2618986815556	21.4636008701077	21.596500366442	21.2365832609599	21.7282082243139	21.9042356714182	21.4892573015435	22.0758355928352	21.835966862875	22.5328328129449	22.62275	21.76256	25	KRT10	>sp|P13645|K1C10_HUMAN Keratin, type I cytoskeletal 10 OS=Homo sapiens GN=KRT10 PE=1 SV=6	0.860194	22.1926549261428	-2.981527964575	0.00821360308196097	0.138292917346833	-2.5235073344169	9	9	+	+	+
>sp|P52564|MP2K6_HUMAN Dual specificity mitogen-activated protein kinase kinase 6 OS=Homo sapiens GN=MAP2K6 PE=1 SV=1	17.1032429622139	15.7333546085015	16.4137042752828	16.0396534130991	15.6835431734507	17.2084584318376	16.391212745114	16.4478324184871	17.0916182535249	15.5792989822164	16.0012428812022	15.2590205557727	16.1025811890908	15.4333900362994	12.2567786813232	15.1192784889583	15.2554266544189	15.7981971545538	16.45696	15.20058	21	MAP2K6	>sp|P52564|MP2K6_HUMAN Dual specificity mitogen-activated protein kinase kinase 6 OS=Homo sapiens GN=MAP2K6 PE=1 SV=1	1.25638	15.8287686058526	-2.97954651873512	0.00824863153637073	0.138292917346833	-2.5273338558755	9	9	-	-	-
>sp|Q9ULX6|AKP8L_HUMAN A-kinase anchor protein 8-like OS=Homo sapiens GN=AKAP8L PE=1 SV=3	19.1448138035301	19.9396245948916	19.839746215575	19.4939673563361	19.2096549054369	19.3119315206299	20.583090789435	16.8365180575756	20.3421307096489	19.9175499698701	18.4862418498562	18.3366076578154	18.7774609052873	17.3143404848613	18.1102194546221	16.6939300509401	16.2510436110166	17.0347439963551	19.41128	17.88024	28	AKAP8L	>sp|Q9ULX6|AKP8L_HUMAN A-kinase anchor protein 8-like OS=Homo sapiens GN=AKAP8L PE=1 SV=3	1.53104	18.6457564407602	-2.97916212046347	0.0082554438103297	0.138292917346833	-2.52807611596491	9	9	+	-	+
>sp|Q05DH4|F16A1_HUMAN Protein FAM160A1 OS=Homo sapiens GN=FAM160A1 PE=2 SV=2	12.6955218954773	11.8407263421186	11.13747680229	12.6955218954773	12.6955218954773	12.6955218954773	12.6272265976159	13.1515093316439	12.5218313527948	13.1235292858111	13.2280833057998	13.3440173950249	12.7215862908649	12.6955218954773	12.6955218954773	13.8848183670847	13.3820064611841	13.7361480264415	12.45121	13.20125	49	FAM160A1	>sp|Q05DH4|F16A1_HUMAN Protein FAM160A1 OS=Homo sapiens GN=FAM160A1 PE=2 SV=2	-0.750042	12.8262272739743	2.9757693720316	0.0083158073485267	0.138825402402552	-2.53462625715305	9	9	-	-	-
>tr|H3BVD9|H3BVD9_HUMAN Kunitz-type protease inhibitor 1 (Fragment) OS=Homo sapiens GN=SPINT1 PE=1 SV=1	14.5985351141055	14.067391131042	14.9351367930825	15.3733122083735	15.2063977526847	15.7736147456448	16.3552863195247	16.1414901980064	16.551746488931	15.5773428695648	16.1472368158848	16.6908837113685	16.7595158225044	16.94220729804	17.206511461332	16.1414901980064	16.4353401805307	15.8613488180751	15.44477	16.41799	24	SPINT1	>tr|H3BVD9|H3BVD9_HUMAN Kunitz-type protease inhibitor 1 (Fragment) OS=Homo sapiens GN=SPINT1 PE=1 SV=1	-0.973218	15.931377107039	2.97322329799636	0.00836138836115128	0.139108303624907	-2.53954043246738	9	9	-	+	-
>sp|Q8N8A6|DDX51_HUMAN ATP-dependent RNA helicase DDX51 OS=Homo sapiens GN=DDX51 PE=1 SV=3	14.6264510029664	14.4210265533391	14.6582008636531	14.2910326059124	13.9170437098515	14.00918993079	15.1946734978976	14.4640712350719	14.7997597898643	14.3935123506712	15.4768852617564	15.2236127327373	14.8207681843943	15.1173919638548	14.6721426051848	15.0705795351201	15.2443413854191	15.4567503730509	14.48683	15.05289	35	DDX51	>sp|Q8N8A6|DDX51_HUMAN ATP-dependent RNA helicase DDX51 OS=Homo sapiens GN=DDX51 PE=1 SV=3	-0.566059	14.7698574211964	2.96770908736023	0.00846093990110175	0.139733284767509	-2.55017941229015	9	9	-	+	-
>tr|J3KSN7|J3KSN7_HUMAN Eukaryotic initiation factor 4A-II (Fragment) OS=Homo sapiens GN=EIF4A2 PE=1 SV=1	22.7169254588521	23.6058629283775	22.6689199391851	22.7150750314399	22.597878711407	22.2834399238755	23.5397397604342	22.3007172285221	22.2866728072398	22.0554981145079	21.4210806687282	21.6989172122342	22.1827100934395	22.5018114978162	22.7749452830025	22.1747823441221	22.2179716400953	21.5449659049571	22.74614	22.06363	7	EIF4A2	>tr|J3KSN7|J3KSN7_HUMAN Eukaryotic initiation factor 4A-II (Fragment) OS=Homo sapiens GN=EIF4A2 PE=1 SV=1	0.682505	22.4048841415687	-2.96734034963005	0.00846763786625308	0.139733284767509	-2.55089064992877	9	9	-	-	-
>tr|M0R0D0|M0R0D0_HUMAN Death-associated protein kinase 3 (Fragment) OS=Homo sapiens GN=DAPK3 PE=1 SV=1	18.0516988048997	18.2223904790642	17.752510291204	19.2477664438225	19.0297186231461	19.3253453917563	18.5126393024126	18.475084776521	18.5832366419064	19.0588514540421	19.5750599326	19.1253411466906	18.5282577822022	19.148540669826	19.3855864032836	19.433667716354	19.3119315206299	19.3711602102007	18.57782	19.21538	6	DAPK3	>tr|M0R0D0|M0R0D0_HUMAN Death-associated protein kinase 3 (Fragment) OS=Homo sapiens GN=DAPK3 PE=1 SV=1	-0.637556	18.8965993105868	2.96637240112459	0.00848524475224686	0.139733284767509	-2.55275755469857	9	9	+	-	+
>sp|P23381|SYWC_HUMAN Tryptophan--tRNA ligase, cytoplasmic OS=Homo sapiens GN=WARS PE=1 SV=2	20.1335455326951	19.5048787367506	19.2921812342697	18.357809122921	18.5428650269861	18.4519798783367	18.0162901117429	19.385277937605	19.543033054047	17.6536385090071	18.2634961248937	19.1071997664276	17.5592699262464	18.7128805622321	18.2274136078328	17.6672467857001	18.08479374532	18.211657264089	19.02532	18.16529	24	WARS	>sp|P23381|SYWC_HUMAN Tryptophan--tRNA ligase, cytoplasmic OS=Homo sapiens GN=WARS PE=1 SV=2	0.860029	18.5953031626168	-2.96394255594551	0.00852960018095506	0.139980438712086	-2.55744330491962	9	9	+	-	+
>tr|H3BSZ8|H3BSZ8_HUMAN Insulin-like growth factor 1 receptor (Fragment) OS=Homo sapiens GN=IGF1R PE=1 SV=1	14.9010935697116	13.5253737564507	13.254498149683	14.6436399624342	12.6955218954773	12.6955218954773	14.7413524420379	18.3835525800902	18.7371763293863	15.5194991436697	15.6041317769851	19.6512859069867	16.0915847117771	20.0166287860472	20.3325826932118	19.3636471236606	18.6574639360421	15.1890450893991	14.84197	17.8251	6	IGF1R	>tr|H3BSZ8|H3BSZ8_HUMAN Insulin-like growth factor 1 receptor (Fragment) OS=Homo sapiens GN=IGF1R PE=1 SV=1	-2.98313	16.3335333193627	2.96239964571296	0.00855788190561742	0.139980438712086	-2.56041811924333	9	9	-	+	-
>sp|Q3V6T2|GRDN_HUMAN Girdin OS=Homo sapiens GN=CCDC88A PE=1 SV=2	14.0560154904472	13.8159894780761	14.3298274378282	12.330143920064	12.2405109694249	12.436302418177	13.9546639387636	13.7155823830299	13.7017534358429	18.1842903975544	16.8309212916112	14.0958844268456	17.0934019337684	15.7448309503325	16.2300131576304	13.645437041953	13.0189691246889	13.316849401225	13.39787	15.35118	82	CCDC88A	>sp|Q3V6T2|GRDN_HUMAN Girdin OS=Homo sapiens GN=CCDC88A PE=1 SV=2	-1.95331	14.3745215109591	2.95771399978474	0.00864432955991546	0.140919976517011	-2.56944963422835	9	9	-	+	-
>tr|H7BYP4|H7BYP4_HUMAN Nuclear body protein SP140-like protein OS=Homo sapiens GN=SP140L PE=1 SV=2	12.6955218954773	10.8780683771903	12.6955218954773	15.2093125191591	12.6955218954773	12.6955218954773	13.8890672047304	13.9482711090275	13.6395087429007	14.9106918034973	15.3285339534169	12.6955218954773	16.0140789060077	14.2667616310364	14.8219922272626	14.7500645589377	14.8054332023677	13.9033932226082	13.14959	14.61072	29	SP140L	>tr|H7BYP4|H7BYP4_HUMAN Nuclear body protein SP140-like protein OS=Homo sapiens GN=SP140L PE=1 SV=2	-1.46113	13.8801548297516	2.95408484731129	0.0087118674376267	0.141506985850608	-2.57644200626832	9	9	-	-	+
>sp|A4FU28|CTGE9_HUMAN cTAGE family member 9 OS=Homo sapiens GN=CTAGE9 PE=2 SV=2	16.84474330271	16.5032046353406	16.5070904386659	17.2980610353666	17.1124467570559	17.7019954181911	16.7750098273903	17.051441634938	16.7207499827559	14.2545489892164	13.1515093316439	14.8863913313442	15.5428554885961	16.9449591584422	17.6897223390161	15.2683786285775	16.3918763792641	15.9644326166797	16.94608	15.56607	36	CTAGE9	>sp|A4FU28|CTGE9_HUMAN cTAGE family member 9 OS=Homo sapiens GN=CTAGE9 PE=2 SV=2	1.38001	16.2560787386219	-2.95221560424637	0.00874685326141403	0.141506985850608	-2.5800425731033	9	9	-	-	-
>sp|O00479|HMGN4_HUMAN High mobility group nucleosome-binding domain-containing protein 4 OS=Homo sapiens GN=HMGN4 PE=1 SV=3	19.954736612049	19.3578866097654	18.6729969951923	17.2911799402319	17.4273780730178	16.1907069942827	19.1980250712202	19.1717380012171	19.2621288909678	18.7353547525383	18.2610344581788	17.9794737667544	15.9768385241229	12.6955218954773	12.6955218954773	12.6955218954773	18.4171131470227	12.6955218954773	18.50298	15.57243	3	HMGN4	>sp|O00479|HMGN4_HUMAN High mobility group nucleosome-binding domain-containing protein 4 OS=Homo sapiens GN=HMGN4 PE=1 SV=3	2.93054	17.0377044121373	-2.9511039674293	0.00876772390717027	0.141506985850608	-2.58218351999526	9	9	-	-	+
>sp|Q9Y6K0|CEPT1_HUMAN Choline/ethanolaminephosphotransferase 1 OS=Homo sapiens GN=CEPT1 PE=1 SV=1	16.0627228065895	17.0768056191139	16.9143022977297	17.1848101167618	16.85703615772	17.1240846694847	13.3748199741929	12.6955218954773	12.6955218954773	10.8780683771903	15.6076846617706	15.707934805319	12.7215862908649	12.6955218954773	12.6955218954773	12.6955218954773	12.6955218954773	12.6955218954773	15.55396	13.15476	15	CEPT1	>sp|Q9Y6K0|CEPT1_HUMAN Choline/ethanolaminephosphotransferase 1 OS=Homo sapiens GN=CEPT1 PE=1 SV=1	2.39919	14.3543616136155	-2.94950329927377	0.00879786088027829	0.141523205815867	-2.58526591021416	9	9	-	-	-
>tr|H0YCS9|H0YCS9_HUMAN Ethylmalonyl-CoA decarboxylase (Fragment) OS=Homo sapiens GN=ECHDC1 PE=1 SV=1	19.3937700476324	19.7946883719154	18.6443190374667	17.9033092346225	18.4471479363628	18.2038343291089	18.9951153124677	20.0119705357971	20.4215844213385	20.0850415497304	20.735038475831	20.2899671837212	20.2636736411934	19.3170844496812	19.693698471233	19.0624526120614	21.195101050621	21.311953473191	19.09064	20.21711	3	ECHDC1	>tr|H0YCS9|H0YCS9_HUMAN Ethylmalonyl-CoA decarboxylase (Fragment) OS=Homo sapiens GN=ECHDC1 PE=1 SV=1	-1.12647	19.6538750074431	2.94695757523385	0.00884599828549707	0.141715333760276	-2.59016720461567	9	9	-	-	-
>tr|H3BR89|H3BR89_HUMAN CCR4-NOT transcription complex subunit 1 (Fragment) OS=Homo sapiens GN=CNOT1 PE=1 SV=1	15.9157115877964	15.7849432427834	16.0776880212745	15.1081293940058	15.5891531709249	15.3161306988791	15.7874918258877	15.1393639957006	15.3751537939328	16.661704935518	17.046383997174	16.511691691892	17.9462303422361	17.309416434588	17.1591558349302	14.1254830390612	16.229267528282	16.8977202963984	15.56597	16.65412	9	CNOT1	>tr|H3BR89|H3BR89_HUMAN CCR4-NOT transcription complex subunit 1 (Fragment) OS=Homo sapiens GN=CNOT1 PE=1 SV=1	-1.08814	16.1100455461814	2.94579072640922	0.00886814768693371	0.141715333760276	-2.59241334082194	9	9	-	+	+
>sp|P50479|PDLI4_HUMAN PDZ and LIM domain protein 4 OS=Homo sapiens GN=PDLIM4 PE=1 SV=2	17.6460726103841	17.9071377154598	17.9343128089134	17.810816091708	18.3201745416793	18.1340611426525	17.4185114910677	17.377747467581	17.7772487406927	18.2953563255651	16.7056117277296	17.2245547575526	16.880261079058	16.7207499827559	16.9033936641065	17.4364497236069	17.4585485554044	17.2590339395447	17.81401	17.20933	19	PDLIM4	>sp|P50479|PDLI4_HUMAN PDZ and LIM domain protein 4 OS=Homo sapiens GN=PDLIM4 PE=1 SV=2	0.60468	17.5116690203035	-2.94282466145265	0.00892469271537123	0.142151335118929	-2.59812174959271	9	9	-	-	-
>tr|A8MX75|A8MX75_HUMAN TFIIH basal transcription factor complex helicase XPD subunit (Fragment) OS=Homo sapiens GN=ERCC2 PE=1 SV=2	13.5054766176924	14.13805186881	14.2984336465773	12.0766419079683	13.74646675363	13.8110115532663	14.4710897524473	14.6940363419956	14.8669286913891	14.1675766286389	13.9593843507322	14.4210265533391	19.4004691516486	18.9809911369515	18.8648798173322	15.3914378563312	15.4070322761461	15.2354312204384	13.95646	16.20314	35	ERCC2	>tr|A8MX75|A8MX75_HUMAN TFIIH basal transcription factor complex helicase XPD subunit (Fragment) OS=Homo sapiens GN=ERCC2 PE=1 SV=2	-2.24668	15.0797981180741	2.94048909754306	0.00896946384711094	0.142397566566225	-2.60261555312464	9	9	+	-	+
>tr|Q6UW50|Q6UW50_HUMAN TOM1 OS=Homo sapiens GN=TOM1 PE=1 SV=1	18.3987432019171	16.5807094366482	15.481360072981	16.7309944233728	16.6080530620643	16.5276822503269	16.097141925834	17.1172125453199	16.3048218126233	14.9471403635126	16.2261157534943	15.103168445853	15.07710655765	15.8003882311747	12.6955218954773	16.1040713854537	16.7697377725344	14.912881210271	16.64964	15.2929	10	TOM1	>tr|Q6UW50|Q6UW50_HUMAN TOM1 OS=Homo sapiens GN=TOM1 PE=1 SV=1	1.35673	15.9712694636949	-2.93789053164406	0.0090195325600531	0.142726023376997	-2.6076141870809	9	9	+	+	-
>tr|A0A096LPH6|A0A096LPH6_HUMAN Zinc finger protein 638 OS=Homo sapiens GN=ZNF638 PE=1 SV=1	16.0505165388964	16.9812529097222	17.170533586153	17.8621935591101	16.5024850144367	16.3469066837225	16.2213276767463	16.4320821627183	16.8676712327058	17.8206001646847	18.3597961019069	16.6337643303381	17.7192747210222	18.190137065124	18.3217851349341	16.4994843805452	16.940824453786	18.0725780910374	16.715	17.61758	43	ZNF638	>tr|A0A096LPH6|A0A096LPH6_HUMAN Zinc finger protein 638 OS=Homo sapiens GN=ZNF638 PE=1 SV=1	-0.902586	17.1662896559772	2.93082150541821	0.00915711267306709	0.144432640797922	-2.62120579295673	9	9	+	-	+
>tr|A0A087WYA7|A0A087WYA7_HUMAN Putative methyltransferase C9orf114 OS=Homo sapiens GN=C9orf114 PE=1 SV=1	17.6450510798566	17.1124467570559	17.0999898313927	16.42939527899	16.578582032246	16.8017853801672	16.5057138166509	16.2601271941278	16.7215126098083	17.3349936951685	16.8430523014684	12.6516177904573	12.7215862908649	15.2714481799913	12.6955218954773	14.5425368243629	16.4981565681071	16.1342374775415	16.79496	14.96591	18	C9orf114	>tr|A0A087WYA7|A0A087WYA7_HUMAN Putative methyltransferase C9orf114 OS=Homo sapiens GN=C9orf114 PE=1 SV=1	1.82905	15.8804308335408	-2.92249561183309	0.00932176451698209	0.146553825318767	-2.63720175467648	9	9	-	-	-
>tr|A0A087WUV5|A0A087WUV5_HUMAN Lactadherin (Fragment) OS=Homo sapiens GN=MFGE8 PE=1 SV=1	17.2460373548799	17.1129491052087	17.6214706387668	12.6955218954773	18.4850448391592	18.1295665067569	16.7645754197312	17.2050459931963	17.1311205361386	15.581618497147	16.1427815316503	15.4924353205238	12.7215862908649	12.6955218954773	12.6955218954773	16.0828269870052	15.9376930294027	15.6204787957322	16.93237	14.7745	5	MFGE8	>tr|A0A087WUV5|A0A087WUV5_HUMAN Lactadherin (Fragment) OS=Homo sapiens GN=MFGE8 PE=1 SV=1	2.15787	15.8534331406997	-2.920849541753	0.00935465498617382	0.146596496525266	-2.64036265747095	9	9	-	+	-
>tr|E9PP27|E9PP27_HUMAN Reticulocalbin-1 (Fragment) OS=Homo sapiens GN=RCN1 PE=1 SV=1	18.4410596923373	19.2160049466762	18.9143026403793	18.5970555429837	18.2634961248937	17.893347424601	17.7093141990976	17.5026303811927	17.0106662625855	17.9956925361221	17.2350672737081	17.1548719221652	16.957885392032	16.9233258698632	17.5740454136125	16.2167449085512	12.6955218954773	12.6955218954773	18.17199	16.16096	4	RCN1	>tr|E9PP27|E9PP27_HUMAN Reticulocalbin-1 (Fragment) OS=Homo sapiens GN=RCN1 PE=1 SV=1	2.01102	17.1664752400976	-2.91547108927237	0.00946290873523697	0.147259272289973	-2.65068709428944	9	9	-	-	-
>sp|P30613|KPYR_HUMAN Pyruvate kinase PKLR OS=Homo sapiens GN=PKLR PE=1 SV=2	18.0804490324821	20.0946096002083	20.1121160901568	18.4253927407879	18.0952425584121	20.7019517719446	18.9136499866997	19.0541177833128	19.1387510934181	19.8918628587512	20.1762993417396	20.0822444730038	20.9718551572246	21.3770826955544	21.470137493061	19.6959534863965	19.5975164198626	19.6605244172418	19.17959	20.32483	29	PKLR	>sp|P30613|KPYR_HUMAN Pyruvate kinase PKLR OS=Homo sapiens GN=PKLR PE=1 SV=2	-1.14524	19.7522087222366	2.91508923475731	0.00947064040570573	0.147259272289973	-2.65141988572886	9	9	-	-	-
>sp|P52292|IMA1_HUMAN Importin subunit alpha-1 OS=Homo sapiens GN=KPNA2 PE=1 SV=1	16.5523503016751	17.0815168814179	17.6053610702048	17.7906191288125	17.8965535507578	17.9733193708385	18.5207348534301	18.0110625132264	17.90002865017	18.0282340988704	19.0030874981704	18.6673317052524	18.5418166218971	17.4040454089881	17.7796441111982	19.4415198435672	19.190094109882	19.3204843362033	17.70351	18.59736	23	KPNA2	>sp|P52292|IMA1_HUMAN Importin subunit alpha-1 OS=Homo sapiens GN=KPNA2 PE=1 SV=1	-0.893857	18.1504335585868	2.9135757936236	0.00950134431752911	0.147259272289973	-2.65432394981463	9	9	+	+	+
>sp|P48668|K2C6C_HUMAN Keratin, type II cytoskeletal 6C OS=Homo sapiens GN=KRT6C PE=1 SV=3	23.5432028362914	23.8075139000009	22.5645310893381	24.2804336520849	23.7547439623102	24.4852471632954	24.3128972013148	24.3957190417227	24.1466326997734	23.3785435415328	23.2528743713602	22.6941035630085	23.6585909853602	23.1567530528937	22.6581489102246	23.5476127342057	23.6956974643821	22.7434877400929	23.92121	23.19842	28	KRT6C	>sp|P48668|K2C6C_HUMAN Keratin, type II cytoskeletal 6C OS=Homo sapiens GN=KRT6C PE=1 SV=3	0.72279	23.5598185505107	-2.91079479219742	0.00955801537580589	0.147259272289973	-2.65965910377291	9	9	-	-	-
>tr|H7C2Y0|H7C2Y0_HUMAN Septin-2 (Fragment) OS=Homo sapiens GN=SEPT2 PE=1 SV=1	20.9562157901542	21.7252292788006	20.9379510388085	21.8127933099489	20.6277425875155	20.3707071914893	21.4677967138363	22.6998184007554	21.2195509903184	21.8281264317902	22.018132769101	21.2790594216395	22.2795916372622	22.8970297523988	22.3112544876596	21.6145971447543	22.5422418111696	22.8464872284881	21.31309	22.17961	9	SEPT2	>tr|H7C2Y0|H7C2Y0_HUMAN Septin-2 (Fragment) OS=Homo sapiens GN=SEPT2 PE=1 SV=1	-0.866524	21.7463514436606	2.90789415316402	0.00961747313751476	0.147259272289973	-2.66522215947758	9	9	+	-	+
>sp|Q9HBI1|PARVB_HUMAN Beta-parvin OS=Homo sapiens GN=PARVB PE=1 SV=1	16.4069672841671	16.1378447202325	13.9184340841979	15.2579224283419	15.5170045363762	15.3130520251103	14.7911039005576	13.116242803219	14.3947028936618	16.6357765460352	18.0855722633619	15.8825805334256	14.7644447178419	15.7652886196618	15.9577409552445	16.36226382004	16.5276822503269	16.6153446252336	14.9837	16.28852	18	PARVB	>sp|Q9HBI1|PARVB_HUMAN Beta-parvin OS=Homo sapiens GN=PARVB PE=1 SV=1	-1.30482	15.6361093892798	2.90781371754751	0.00961912701267057	0.147259272289973	-2.66537640117847	9	9	-	-	-
>tr|E9PQR3|E9PQR3_HUMAN Ferritin OS=Homo sapiens GN=FTH1 PE=1 SV=1	17.8665854292842	18.0016250680191	16.5407695933451	12.6955218954773	12.6955218954773	12.6955218954773	12.6955218954773	12.6955218954773	12.6955218954773	18.5148724179392	18.7265218689878	17.2932862766916	17.3153274197176	12.6955218954773	17.4200653951439	16.9324210390607	17.4475407160584	17.2888013031354	14.2869	17.07048	3	FTH1	>tr|E9PQR3|E9PQR3_HUMAN Ferritin OS=Homo sapiens GN=FTH1 PE=1 SV=1	-2.78358	15.6786927664291	2.90722225248471	0.00963129686909751	0.147259272289973	-2.66651054344507	9	9	-	-	+
>tr|B5MDE0|B5MDE0_HUMAN Protein RFT1 homolog OS=Homo sapiens GN=RFT1 PE=1 SV=1	17.8550330237328	15.7981971545538	15.8798395150922	16.9164177468381	17.170533586153	17.0172945589363	15.2630004987167	14.9106918034973	16.1530363767155	14.8094407615527	13.9801577583742	13.7824573744489	15.7055728217976	15.9266625439217	15.6107712355989	15.8132008263431	14.8497505201594	15.6857680690332	16.32934	15.12931	22	RFT1	>tr|B5MDE0|B5MDE0_HUMAN Protein RFT1 homolog OS=Homo sapiens GN=RFT1 PE=1 SV=1	1.20003	15.7293236764147	-2.90548392818458	0.00966715060792479	0.147259272289973	-2.66984340494704	9	9	-	-	-
>tr|H0YJJ8|H0YJJ8_HUMAN Translation initiation factor eIF-2B subunit beta (Fragment) OS=Homo sapiens GN=EIF2B2 PE=1 SV=1	16.9164177468381	17.7994041173326	18.0734976762011	18.1156951701414	17.7539876698615	17.9084832406134	19.1327277769733	18.5171249812493	18.5560221778078	18.630354159494	19.9580817801136	19.2491360853863	18.8078952652692	18.7486877782611	17.9515565965525	19.4057891891766	18.802979673773	18.6045967762896	18.08593	18.90656	6	EIF2B2	>tr|H0YJJ8|H0YJJ8_HUMAN Translation initiation factor eIF-2B subunit beta (Fragment) OS=Homo sapiens GN=EIF2B2 PE=1 SV=1	-0.820635	18.4962465478519	2.90535752157099	0.00966976283666146	0.147259272289973	-2.67008573909294	9	9	+	-	-
>sp|P56537|IF6_HUMAN Eukaryotic translation initiation factor 6 OS=Homo sapiens GN=EIF6 PE=1 SV=1	17.9536411805053	18.6519428248886	18.5975299227431	19.1256652652979	18.912779777105	18.0103711953279	18.4128191598827	18.5763956660031	18.5955247892576	18.745305916267	19.2165967794941	19.3640743804776	19.4614151193132	18.7247269578874	18.7240271284479	19.3319164998033	18.8573722323704	19.0025520851365	18.53741	19.04755	11	EIF6	>sp|P56537|IF6_HUMAN Eukaryotic translation initiation factor 6 OS=Homo sapiens GN=EIF6 PE=1 SV=1	-0.510146	18.7924809377894	2.90147676113427	0.00975029322061381	0.147664583263936	-2.67752400842576	9	9	+	-	+
>tr|C9JA69|C9JA69_HUMAN HMG box transcription factor BBX OS=Homo sapiens GN=BBX PE=1 SV=1	15.1089377828783	14.8627160341975	13.8722109677021	12.2917435993015	13.9737030582756	14.067391131042	15.6022097185858	16.3637526225196	16.3654116414318	14.8529554246368	15.5557179743016	15.2380871825869	16.8546502223233	16.8110119125942	17.2689754662076	16.7479178478753	15.5224219206555	17.4887673915786	14.72312	16.26006	37	BBX	>tr|C9JA69|C9JA69_HUMAN HMG box transcription factor BBX OS=Homo sapiens GN=BBX PE=1 SV=1	-1.53694	15.4915878832608	2.90070540724254	0.00976637689312919	0.147664583263936	-2.67900211005757	9	9	+	-	+
>sp|Q96AQ6|PBIP1_HUMAN Pre-B-cell leukemia transcription factor-interacting protein 1 OS=Homo sapiens GN=PBXIP1 PE=1 SV=1	13.0130400634365	12.7821657796216	11.7512672081306	14.00918993079	11.5656829307515	12.1520318135135	13.5097270094131	12.6559445819302	12.6955218954773	14.8399794469284	14.6582008636531	13.0314854121241	15.717300992745	16.5706387786554	16.7798978057723	12.6955218954773	12.8995715690259	12.5853032694874	12.68162	14.41977	30	PBXIP1	>sp|Q96AQ6|PBIP1_HUMAN Pre-B-cell leukemia transcription factor-interacting protein 1 OS=Homo sapiens GN=PBXIP1 PE=1 SV=1	-1.73815	13.5506928470518	2.89726104955614	0.00983850985236958	0.147664583263936	-2.68560089312658	9	9	-	-	+
>tr|H0YBJ8|H0YBJ8_HUMAN Protein LYRIC (Fragment) OS=Homo sapiens GN=MTDH PE=1 SV=1	17.1322108599312	17.290656538168	17.3657149337783	16.9169753113118	17.5632081433398	16.3787923687403	16.5750089927516	16.2379761148301	16.3090744935714	16.3533085140195	17.290656538168	16.2449257639908	12.7215862908649	12.6955218954773	12.6955218954773	16.4494182722254	15.5945942468782	15.6467893513806	16.86329	15.07692	8	MTDH	>tr|H0YBJ8|H0YBJ8_HUMAN Protein LYRIC (Fragment) OS=Homo sapiens GN=MTDH PE=1 SV=1	1.78637	15.9701078069391	-2.89536608031526	0.00987841455611396	0.147664583263936	-2.68923031179762	9	9	+	-	+
>sp|Q6NUQ1|RINT1_HUMAN RAD50-interacting protein 1 OS=Homo sapiens GN=RINT1 PE=1 SV=1	19.5080702327856	18.6940635343124	19.0442473919154	17.5939999870883	18.0299764147621	17.9216574581037	19.5128968274235	19.5048787367506	19.6317209306757	18.9561475020633	19.2921812342697	17.3052069347712	14.5703178798182	17.897797794756	14.507297723073	18.5616624394008	13.0934254400246	13.3606420044488	18.82683	16.39385	30	RINT1	>sp|Q6NUQ1|RINT1_HUMAN RAD50-interacting protein 1 OS=Homo sapiens GN=RINT1 PE=1 SV=1	2.43298	17.6103439148024	-2.89458465213984	0.00989491562282859	0.147664583263936	-2.69072676550859	9	9	-	-	-
>sp|O00442|RTCA_HUMAN RNA 3'-terminal phosphate cyclase OS=Homo sapiens GN=RTCA PE=1 SV=1	18.4392877106481	18.3077746802061	18.3488858422113	19.0925782258836	17.1793218470231	19.2462142507098	18.7085138274109	19.2843845749984	19.0557812163845	19.4908422933281	19.3303721428628	20.0393004398686	19.3600750520867	20.0078841945784	20.2719952819741	19.1399366507041	18.7999858962905	18.7226543195699	18.62919	19.46256	19	RTCA	>sp|O00442|RTCA_HUMAN RNA 3'-terminal phosphate cyclase OS=Homo sapiens GN=RTCA PE=1 SV=1	-0.833367	19.0458771359299	2.89425337026701	0.00990191920050152	0.147664583263936	-2.69136114133969	9	9	-	-	+
>sp|P45974|UBP5_HUMAN Ubiquitin carboxyl-terminal hydrolase 5 OS=Homo sapiens GN=USP5 PE=1 SV=2	17.3995389548481	16.4041280790605	16.6991464198071	16.8819330156649	17.284593230152	16.9288506061349	16.7704831225597	16.0209413077453	16.8253146633923	17.17995765853	17.4195347250419	17.2937448831255	17.7623552092657	17.7597585170104	17.5135813556472	16.668127347655	17.0727682200827	17.6053610702048	16.80166	17.36391	39	USP5	>sp|P45974|UBP5_HUMAN Ubiquitin carboxyl-terminal hydrolase 5 OS=Homo sapiens GN=USP5 PE=1 SV=2	-0.562251	17.0827843547738	2.89287579276422	0.00993109382539777	0.147664583263936	-2.69399884589573	9	9	-	-	-
>tr|B5MCN0|B5MCN0_HUMAN Atlastin-2 OS=Homo sapiens GN=ATL2 PE=1 SV=1	21.371023863451	19.5128968274235	20.4669568999933	19.4155892810024	19.7550344788374	19.5668845502145	19.9655112655629	19.8977758114236	20.0872653681774	19.3152940004492	19.3864225109902	18.9809911369515	19.4764352044763	19.2631373696413	19.2658909863858	19.4538964588287	19.6027251548124	19.5677570381838	20.00433	19.36806	15	ATL2	>tr|B5MCN0|B5MCN0_HUMAN Atlastin-2 OS=Homo sapiens GN=ATL2 PE=1 SV=1	0.636265	19.686193789267	-2.89247738524618	0.00993954687676145	0.147664583263936	-2.6947616222416	9	9	-	+	-
>tr|K7EPJ9|K7EPJ9_HUMAN Keratin, type I cytoskeletal 17 (Fragment) OS=Homo sapiens GN=KRT17 PE=1 SV=1	22.7658084794641	22.3794291844677	22.6608553098888	23.4943831685348	23.7417993125332	23.8180612489709	22.7787039420639	22.4893779290341	22.4346112633181	22.4824120517073	22.4423710281301	21.4696296844046	22.2994375100178	22.2179716400953	22.2089611109354	22.4875585449275	21.6385583263426	22.9125673434416	22.95145	22.23994	11	KRT17	>tr|K7EPJ9|K7EPJ9_HUMAN Keratin, type I cytoskeletal 17 (Fragment) OS=Homo sapiens GN=KRT17 PE=1 SV=1	0.711507	22.5956942821265	-2.88676647595548	0.0100614834953242	0.148945813892804	-2.70569200645494	9	9	+	-	-
>tr|D6RAU2|D6RAU2_HUMAN Guanine nucleotide-binding protein subunit beta-2-like 1 OS=Homo sapiens GN=GNB2L1 PE=1 SV=1	22.0714603107511	22.2229862668826	21.8141532918811	21.9708538060927	21.9464304752184	22.153430256172	21.6770421112436	21.9738958530806	21.731696444621	22.7667054845549	22.272959345974	22.4803227669953	22.1729717299368	21.7632912383524	22.4661892028216	22.3150934973139	22.2873769334332	22.6384535887361	21.95133	22.35148	8	GNB2L1	>tr|D6RAU2|D6RAU2_HUMAN Guanine nucleotide-binding protein subunit beta-2-like 1 OS=Homo sapiens GN=GNB2L1 PE=1 SV=1	-0.400157	22.1514062557812	2.8855748469524	0.0100871084336625	0.148945813892804	-2.70797189186531	9	9	+	+	+
>sp|Q9NW13|RBM28_HUMAN RNA-binding protein 28 OS=Homo sapiens GN=RBM28 PE=1 SV=3	20.5277357504759	20.1183996554346	19.8131997291523	19.2789914029367	19.2140927630242	19.473523440775	19.9884614897502	20.1923468046113	19.9787217040633	20.3176843367627	20.1620506560292	20.1274613036133	21.0265138103322	20.4030438097379	20.9596154823624	19.8421647481882	20.4660339533846	20.6110256698693	19.84283	20.43507	33	RBM28	>sp|Q9NW13|RBM28_HUMAN RNA-binding protein 28 OS=Homo sapiens GN=RBM28 PE=1 SV=3	-0.592236	20.1389481394724	2.88161783304874	0.0101726541384295	0.14948154906854	-2.7155405851965	9	9	-	-	-
>tr|C9JIC6|C9JIC6_HUMAN Ran-specific GTPase-activating protein (Fragment) OS=Homo sapiens GN=RANBP1 PE=1 SV=1	20.7646283979004	20.6996930295892	20.6803049847152	22.341356970474	22.8003490913341	22.3977370581699	23.2924369611	23.2289130901564	22.1413073546508	23.1965955035527	23.2003435738454	22.7931392686002	21.8015879631557	23.317758082668	23.4943831685348	23.7388302858601	23.7364454722305	23.396531121035	22.03853	23.18618	1	RANBP1	>tr|C9JIC6|C9JIC6_HUMAN Ran-specific GTPase-activating protein (Fragment) OS=Homo sapiens GN=RANBP1 PE=1 SV=1	-1.14765	22.612352298754	2.87863583410253	0.0102375843514897	0.14948154906854	-2.72124223207064	9	9	+	-	+
>tr|B1AMA6|B1AMA6_HUMAN Target of rapamycin complex 2 subunit MAPKAP1 (Fragment) OS=Homo sapiens GN=MAPKAP1 PE=1 SV=1	19.3805375552118	19.8558774779965	19.5706883961428	21.7190811290466	21.6415989525051	22.1385373470613	16.2411617769763	16.4582971325929	16.3649881482293	17.0076080685372	17.5677264902052	20.2230618169164	12.7215862908649	12.6955218954773	12.6955218954773	16.5566728778144	15.2831631146276	18.3939122881432	19.26342	15.90497	6	MAPKAP1	>tr|B1AMA6|B1AMA6_HUMAN Target of rapamycin complex 2 subunit MAPKAP1 (Fragment) OS=Homo sapiens GN=MAPKAP1 PE=1 SV=1	3.35844	17.5841968141015	-2.87793561203497	0.0102528890190603	0.14948154906854	-2.72258080839517	9	9	-	-	+
>tr|D6RGI7|D6RGI7_HUMAN Probable ATP-dependent RNA helicase DDX41 OS=Homo sapiens GN=DDX41 PE=1 SV=1	18.9149914595034	18.8212798480055	19.0801575022367	18.6041756988841	18.3990886805698	18.274442726609	19.4509656507665	19.8450059713922	19.6161977885885	14.6332393513758	14.0760482455569	17.6934753078095	18.4550056426175	17.8076948582448	18.2871734625365	18.9516299084948	19.0524897478448	15.4896046514939	19.0007	17.16071	10	DDX41	>tr|D6RGI7|D6RGI7_HUMAN Probable ATP-dependent RNA helicase DDX41 OS=Homo sapiens GN=DDX41 PE=1 SV=1	1.83999	18.080703694585	-2.87631501236048	0.0102883951524228	0.14948154906854	-2.72567843509275	9	9	-	+	+
>tr|A8MUN2|A8MUN2_HUMAN Apolipoprotein B-100 OS=Homo sapiens GN=APOB PE=1 SV=2	18.984590767415	18.4910758807134	18.1243479020269	18.2022199915504	17.3702358634992	17.7340833203284	18.873060029819	18.3781812028021	18.5328865910084	15.4931059929722	18.4006345517775	17.4085033206283	16.4372059227584	16.0172010443889	14.3318081217565	14.8738737787135	18.6813400233534	18.5824931652675	18.29896	16.6918	41	APOB	>tr|A8MUN2|A8MUN2_HUMAN Apolipoprotein B-100 OS=Homo sapiens GN=APOB PE=1 SV=2	1.60717	17.4953804150433	-2.87598551354009	0.0102956287533139	0.14948154906854	-2.72630817577554	9	9	+	-	-
>sp|P13929|ENOB_HUMAN Beta-enolase OS=Homo sapiens GN=ENO3 PE=1 SV=5	18.3262663625163	18.7141046799704	18.6080161368001	19.6356946742063	19.0990838557105	19.0893053471615	16.7389527379322	17.2573142861108	17.2542552787426	18.0362475323712	17.6554744876341	18.9189649057745	15.5302009067657	14.3637860353341	15.8169598973161	16.4478324184871	16.8380337843169	16.8489870415385	18.30255	16.71739	19	ENO3	>sp|P13929|ENOB_HUMAN Beta-enolase OS=Homo sapiens GN=ENO3 PE=1 SV=5	1.58517	17.5099711315938	-2.87542199301362	0.010308011308761	0.14948154906854	-2.72738512887636	9	9	+	+	-
>tr|Q5VZY9|Q5VZY9_HUMAN Serine/threonine-protein kinase DCLK1 OS=Homo sapiens GN=DCLK1 PE=1 SV=1	18.7892609286437	19.012424552404	18.9741031351582	17.5860804052578	16.9980709871976	17.5803241227097	18.0020441374671	18.6796671201142	18.5504016667096	19.3908035271483	19.3913396061779	18.926033607883	18.8495831939032	18.76932827679	18.9246822972003	19.1593616128465	18.8289658458938	18.6568600619259	18.24138	18.98855	17	DCLK1	>tr|Q5VZY9|Q5VZY9_HUMAN Serine/threonine-protein kinase DCLK1 OS=Homo sapiens GN=DCLK1 PE=1 SV=1	-0.747176	18.6149630603017	2.86966374404859	0.0104353684421888	0.150878035393313	-2.73838606213033	9	9	-	-	-
>tr|Q5VZM0|Q5VZM0_HUMAN Ras-related GTP-binding protein B (Fragment) OS=Homo sapiens GN=RRAGB PE=1 SV=1	15.0509180185209	15.8613488180751	16.1719494678054	16.0498128104258	15.8058389475819	16.0797389374933	17.181483688529	17.5498205413425	17.1135946839982	17.1565810395008	17.1552264974952	16.2183584948745	16.7354740449186	17.7197771743685	17.9974810444382	17.3952877032046	17.6961139140053	17.0686964113696	16.31828	17.23811	10	RRAGB	>tr|Q5VZM0|Q5VZM0_HUMAN Ras-related GTP-binding protein B (Fragment) OS=Homo sapiens GN=RRAGB PE=1 SV=1	-0.919832	16.7781945687749	2.86826659975765	0.0104664980461018	0.150879072723925	-2.74105422446861	9	9	+	-	+
>tr|H0YE22|H0YE22_HUMAN Eukaryotic translation initiation factor 4 gamma 2 (Fragment) OS=Homo sapiens GN=EIF4G2 PE=1 SV=1	20.0769051074699	20.1136793487707	19.9880041454307	18.3154530300984	18.1477916203227	18.5970555429837	19.1565919693654	19.0176079143726	20.3020276180384	20.6118914850562	20.4305340597486	20.8469493046454	21.3147148433956	18.8670247672022	19.4389837570128	20.1274613036133	20.9356251285364	20.8408420265573	19.30168	20.37934	11	EIF4G2	>tr|H0YE22|H0YE22_HUMAN Eukaryotic translation initiation factor 4 gamma 2 (Fragment) OS=Homo sapiens GN=EIF4G2 PE=1 SV=1	-1.07766	19.8405079429233	2.86334200389637	0.010576939489221	0.151143850378351	-2.75045561779495	9	9	+	+	-
>tr|E9PIE4|E9PIE4_HUMAN Mitochondrial carrier homolog 2 (Fragment) OS=Homo sapiens GN=MTCH2 PE=1 SV=6	16.0099127797648	15.7830552938325	15.9217596912955	13.7445006251681	12.6955218954773	12.3996652340034	14.4041083544713	14.5663924129059	14.5678469720213	17.2917594117464	16.6908837113685	15.6314823352728	16.4077160368259	16.7764331836323	16.9486283305424	14.0915527959716	15.5310489681698	14.903857720221	14.45475	16.03037	13	MTCH2	>tr|E9PIE4|E9PIE4_HUMAN Mitochondrial carrier homolog 2 (Fragment) OS=Homo sapiens GN=MTCH2 PE=1 SV=6	-1.57562	15.2425625418162	2.86226275314051	0.0106012932753996	0.151143850378351	-2.75251530669307	9	9	-	+	+
>sp|Q86V81|THOC4_HUMAN THO complex subunit 4 OS=Homo sapiens GN=ALYREF PE=1 SV=3	21.2716735445678	21.2447592923064	21.7054005531633	20.9601893095414	20.7230421207219	20.8117125800075	21.961527557381	21.7177357662475	21.7190811290466	21.9098276424769	21.8623190035534	21.3597589705087	22.3966850963642	21.7578368687453	21.815761134598	22.1357357258925	21.6281480352296	22.3754047443064	21.34612	21.91572	12	ALYREF	>sp|Q86V81|THOC4_HUMAN THO complex subunit 4 OS=Homo sapiens GN=ALYREF PE=1 SV=3	-0.569595	21.6309221708144	2.86169510356836	0.0106141242761977	0.151143850378351	-2.75359853602245	9	9	-	+	-
>tr|I3L2H5|I3L2H5_HUMAN Serine/threonine-protein kinase PLK1 (Fragment) OS=Homo sapiens GN=PLK1 PE=1 SV=1	12.6955218954773	12.6955218954773	13.3302791554234	12.6955218954773	12.6955218954773	12.6955218954773	12.6955218954773	12.6955218954773	12.6955218954773	14.3067228012077	12.6955218954773	15.5854539860928	12.7215862908649	12.6955218954773	12.6955218954773	17.0384162315765	16.7754959004101	16.7089617623079	12.76605	14.58036	7	PLK1	>tr|I3L2H5|I3L2H5_HUMAN Serine/threonine-protein kinase PLK1 (Fragment) OS=Homo sapiens GN=PLK1 PE=1 SV=1	-1.81431	13.6732031654519	2.86159760000853	0.0106163297299889	0.151143850378351	-2.75378459247406	9	9	+	-	+
>sp|Q8WUY1|THEM6_HUMAN Protein THEM6 OS=Homo sapiens GN=THEM6 PE=1 SV=2	18.6274547727158	17.4671001207511	17.6701721525035	18.5257373097256	18.5634540818342	18.1734368808999	17.6188456055506	17.9960975062199	17.7839842920544	16.8729203192629	16.4430972079264	16.9515018686069	18.8137945134821	17.0873262075881	17.4379326600778	17.2342780712884	17.3464540943592	17.3885432118801	18.04736	17.28621	10	THEM6	>sp|Q8WUY1|THEM6_HUMAN Protein THEM6 OS=Homo sapiens GN=THEM6 PE=1 SV=2	0.761159	17.6667850487071	-2.86053350537212	0.0106404275070803	0.151143850378351	-2.75581497021099	9	9	-	-	-
>sp|Q7Z7H5|TMED4_HUMAN Transmembrane emp24 domain-containing protein 4 OS=Homo sapiens GN=TMED4 PE=1 SV=1	19.3681765489155	19.9562019919475	20.2873370235377	19.5344985655169	19.3738716918003	19.3882582843026	19.1757566546883	19.4150733974047	19.2854136211468	19.6781626026115	19.8582036120401	20.2671385316222	16.1702473677269	17.1349294828374	16.1393577911522	17.5151384502684	17.7587125002064	18.0257122448372	19.53162	18.06084	10	TMED4	>sp|Q7Z7H5|TMED4_HUMAN Transmembrane emp24 domain-containing protein 4 OS=Homo sapiens GN=TMED4 PE=1 SV=1	1.47078	18.7962327979202	-2.854222544272	0.0107844367222771	0.152349114963727	-2.76785190137213	9	9	-	-	-
>sp|Q9Y6X9|MORC2_HUMAN MORC family CW-type zinc finger protein 2 OS=Homo sapiens GN=MORC2 PE=1 SV=2	19.2343626329126	18.9193876215927	18.2158565977883	18.6602510532736	18.4328697291207	18.2603289178904	19.7836853838874	19.8248589362058	20.4261536710104	19.3820536399973	20.3197191717163	18.9627608841159	20.0267268116181	20.620475697111	19.8572638021086	20.7150274014402	20.4059550740798	19.7653595383848	19.08419	20.00615	41	MORC2	>sp|Q9Y6X9|MORC2_HUMAN MORC family CW-type zinc finger protein 2 OS=Homo sapiens GN=MORC2 PE=1 SV=2	-0.921954	19.5451720313474	2.853413678293	0.0108030296725073	0.152349114963727	-2.76939404901361	9	9	+	-	+
>sp|Q9BPV8|P2Y13_HUMAN P2Y purinoceptor 13 OS=Homo sapiens GN=P2RY13 PE=2 SV=3	12.6955218954773	14.663260372423	14.4287348974587	12.6955218954773	12.6955218954773	12.6955218954773	16.7811699682043	17.290656538168	16.6621359111798	16.1408918439901	16.3393967336586	15.2954515611944	16.1414901980064	16.6181512313397	16.8135128831718	16.7222482361335	16.6831942337975	16.5191007892142	14.51201	16.36372	13	P2RY13	>sp|Q9BPV8|P2Y13_HUMAN P2Y purinoceptor 13 OS=Homo sapiens GN=P2RY13 PE=2 SV=3	-1.85171	15.4378601655472	2.85189881534105	0.0108379342740484	0.152349114963727	-2.77228184648204	9	9	-	-	-
>sp|O75381|PEX14_HUMAN Peroxisomal membrane protein PEX14 OS=Homo sapiens GN=PEX14 PE=1 SV=1	17.9882272640122	16.7222482361335	16.9471641707124	16.7670981610518	16.4084364852319	16.497087446435	17.5180527412756	17.1164831001124	17.2764866064836	16.6412371207135	16.392548771801	16.4204629799941	15.6193307962542	16.3133777074797	15.3751537939328	16.4033160598694	16.6902796854627	17.0404630769871	17.02681	16.3218	16	PEX14	>sp|O75381|PEX14_HUMAN Peroxisomal membrane protein PEX14 OS=Homo sapiens GN=PEX14 PE=1 SV=1	0.705013	16.6743030113302	-2.85134512758259	0.0108507191802078	0.152349114963727	-2.77333722534494	9	9	-	+	+
>sp|Q9Y4G6|TLN2_HUMAN Talin-2 OS=Homo sapiens GN=TLN2 PE=1 SV=4	14.4516038475495	13.4999372190525	13.116242803219	14.2042586117156	13.7304799336681	14.3171112154447	14.3233441878477	14.1267807885754	14.1694255609049	13.7527799497472	13.9297161154533	12.9582238890434	12.7215862908649	10.5410199533237	12.6955218954773	11.0914988691372	14.099912288167	13.2309898271826	13.99324	12.78014	127	TLN2	>sp|Q9Y4G6|TLN2_HUMAN Talin-2 OS=Homo sapiens GN=TLN2 PE=1 SV=4	1.2131	13.3866907359097	-2.84214828838744	0.011065219705108	0.154422991274744	-2.79085768689795	9	9	+	-	-
>tr|A0A0D9SFF6|A0A0D9SFF6_HUMAN Spectrin alpha chain, non-erythrocytic 1 (Fragment) OS=Homo sapiens GN=SPTAN1 PE=1 SV=1	22.4205626005629	21.9635792874183	21.961527557381	21.4532960720932	21.6909906342912	21.6876464024859	21.2612761221069	21.1207854545704	20.0275927803391	21.4864467791607	20.0931378402642	20.7792572246522	20.7717268720789	21.2233469543809	20.6191092512285	20.465311729454	20.8953691514056	20.3137072521296	21.5097	20.7386	6	SPTAN1	>tr|A0A0D9SFF6|A0A0D9SFF6_HUMAN Spectrin alpha chain, non-erythrocytic 1 (Fragment) OS=Homo sapiens GN=SPTAN1 PE=1 SV=1	0.771094	21.1241483314446	-2.83813049257025	0.0111602069580211	0.154422991274744	-2.79850611425943	9	9	-	+	-
>sp|Q96HR9|REEP6_HUMAN Receptor expression-enhancing protein 6 OS=Homo sapiens GN=REEP6 PE=1 SV=1	20.5972043383627	20.2058239599785	19.5157042347687	19.1673890823376	18.8330641155389	19.0837927205397	18.6150928186971	19.3613522256313	18.7887790805875	19.7637792752651	19.8391822735828	19.9391340955503	19.9728789099253	20.7026637051644	20.9922222306133	19.3469647271196	22.6193860845524	22.7455675627954	19.35202	20.65798	9	REEP6	>sp|Q96HR9|REEP6_HUMAN Receptor expression-enhancing protein 6 OS=Homo sapiens GN=REEP6 PE=1 SV=1	-1.30595	20.004998968945	2.83810743150028	0.0111607544233768	0.154422991274744	-2.79855000414619	9	9	-	-	+
>sp|P61923|COPZ1_HUMAN Coatomer subunit zeta-1 OS=Homo sapiens GN=COPZ1 PE=1 SV=1	19.2256170809314	18.4565457624814	18.5061569010517	18.7929952448528	18.896621609738	18.8356974868582	20.3216859725661	20.3044189799722	18.5278776094987	19.4568806505789	18.6314222714128	20.4243072775522	21.180224393689	19.0356120637326	20.7785090301582	20.7646283979004	20.476634482298	20.8132670767072	19.0964	20.1735	7	COPZ1	>sp|P61923|COPZ1_HUMAN Coatomer subunit zeta-1 OS=Homo sapiens GN=COPZ1 PE=1 SV=1	-1.0771	19.6349501273322	2.83695528986285	0.0111881390494605	0.154422991274744	-2.80074261690733	9	9	-	+	-
>tr|H0Y449|H0Y449_HUMAN Nuclease-sensitive element-binding protein 1 (Fragment) OS=Homo sapiens GN=YBX1 PE=1 SV=1	21.2508552519747	21.4470222884243	21.0182630723723	20.519469484342	20.3722622060116	20.4894635467957	21.0884770836998	21.1693168035187	21.1560189491675	21.0462244837509	21.1594879780447	21.4825165348417	20.9569696106896	22.2324465127221	21.9504306023324	21.8186531514628	21.3138638753059	21.8070315329197	20.94568	21.52974	17	YBX1	>tr|H0Y449|H0Y449_HUMAN Nuclease-sensitive element-binding protein 1 (Fragment) OS=Homo sapiens GN=YBX1 PE=1 SV=1	-0.584053	21.2377096093542	2.83659868880823	0.0111966280332764	0.154422991274744	-2.80142119761157	9	9	+	-	+
>tr|B4DP31|B4DP31_HUMAN Phosphoribosyl pyrophosphate synthase-associated protein 1 OS=Homo sapiens GN=PRPSAP1 PE=1 SV=1	16.2913561190231	17.2143754314686	16.9347226287145	16.3697297373208	16.2404730225266	17.4327714562737	17.5769004559001	18.015033373315	17.5278169431022	17.1920816054185	17.3086027232682	16.9619887443359	18.7471188392447	19.5783768253497	19.4836582852722	19.0639881239186	17.432325845523	18.0028249409768	17.06702	18.19677	15	PRPSAP1	>tr|B4DP31|B4DP31_HUMAN Phosphoribosyl pyrophosphate synthase-associated protein 1 OS=Homo sapiens GN=PRPSAP1 PE=1 SV=1	-1.12975	17.6318969500529	2.83576735421529	0.011216442309676	0.154422991274744	-2.80300304807979	9	9	-	-	-
>tr|X6R7M0|X6R7M0_HUMAN CWF19-like protein 1 OS=Homo sapiens GN=CWF19L1 PE=1 SV=1	16.957885392032	14.3463676361348	14.3050762692112	20.5404663309648	20.5707464420038	20.4816638849716	16.0140789060077	16.0320967680697	16.5872440793563	16.1197562550791	16.4168500760014	14.5741778655312	12.7215862908649	12.6955218954773	12.6955218954773	16.2563588247352	14.3907747698903	15.3171770770743	17.31507	14.57641	12	CWF19L1	>tr|X6R7M0|X6R7M0_HUMAN CWF19-like protein 1 OS=Homo sapiens GN=CWF19L1 PE=1 SV=1	2.73866	15.9457417032713	-2.83493432661648	0.0112363308624766	0.154422991274744	-2.80458796997198	9	9	-	-	-
>tr|H0YJ17|H0YJ17_HUMAN Neuroguidin (Fragment) OS=Homo sapiens GN=NGDN PE=1 SV=1	18.5278776094987	19.5695516605746	19.0727894547821	18.926033607883	18.7913717891319	18.8249153106666	18.6971758562971	19.3492061262584	18.2987736847566	18.9334975436402	18.0963413213215	18.8686597077105	17.8665854292842	17.0218249470442	17.0761557414509	17.9846386422133	18.2064362561351	18.9199075610929	18.8953	18.10823	13	NGDN	>tr|H0YJ17|H0YJ17_HUMAN Neuroguidin (Fragment) OS=Homo sapiens GN=NGDN PE=1 SV=1	0.787072	18.501763458319	-2.83369967338215	0.0112658708177734	0.154422991274744	-2.80693674998837	9	9	+	-	-
>sp|Q14677|EPN4_HUMAN Clathrin interactor 1 OS=Homo sapiens GN=CLINT1 PE=1 SV=1	22.041988103927	21.8686532044631	21.6453969479916	21.5350695042903	21.5379169383794	21.7607592525022	21.3180133137048	21.0096359192409	21.3003733204171	21.3256258244888	20.3896122819451	21.1395997789918	20.7664341016413	20.803994066504	20.8385432189515	21.4800470928699	21.4791162624465	21.2564258539212	21.55753	21.05327	18	CLINT1	>sp|Q14677|EPN4_HUMAN Clathrin interactor 1 OS=Homo sapiens GN=CLINT1 PE=1 SV=1	0.504268	21.3054002770376	-2.83292212928109	0.0112845125365447	0.154422991274744	-2.80841576489821	9	9	-	+	+
>tr|E9PI68|E9PI68_HUMAN Signal peptidase complex subunit 2 OS=Homo sapiens GN=SPCS2 PE=1 SV=1	23.0648287652763	22.6193860845524	22.6351756513624	22.1426863776828	22.4189059203192	22.1906431546607	21.5982654737934	21.2500573922332	21.237979124458	22.0758355928352	21.7523408990652	21.3512856345657	21.4983191476971	21.4405124723909	19.921546408353	18.9022407337826	21.1577838910771	21.2000317840812	22.12866	21.03332	11	SPCS2	>tr|E9PI68|E9PI68_HUMAN Signal peptidase complex subunit 2 OS=Homo sapiens GN=SPCS2 PE=1 SV=1	1.09534	21.5809902504548	-2.82575403418383	0.0114577755290971	0.156353577304364	-2.82204444230364	9	9	-	-	-
>tr|K7ERY7|K7ERY7_HUMAN 60S ribosomal protein L27 OS=Homo sapiens GN=RPL27 PE=1 SV=1	24.0742293380237	24.7660942889123	24.7284880714506	23.6289507490328	24.3693405412963	23.8616329048993	25.0086842483919	25.0214869134981	25.1445895056263	25.7636284108089	25.7842912179575	25.1445895056263	24.1096567720192	24.9456757401149	25.3588063324458	25.3536963658762	25.2671334288852	25.2712953010714	24.5115	25.22209	2	RPL27	>tr|K7ERY7|K7ERY7_HUMAN 60S ribosomal protein L27 OS=Homo sapiens GN=RPL27 PE=1 SV=1	-0.710586	24.866792757552	2.82382550881406	0.0115048268380979	0.156555878934117	-2.82570922358587	9	9	-	+	+
>tr|H7C148|H7C148_HUMAN CCR4-NOT transcription complex subunit 3 (Fragment) OS=Homo sapiens GN=CNOT3 PE=1 SV=1	16.0752906001203	15.6250696726635	15.4441936870874	12.6955218954773	15.1744087076625	15.7489378848395	16.2261157534943	16.8464570353147	16.3255571439382	16.9039821375903	15.0956663318387	16.2273163530646	18.5475316213016	18.4117779731529	18.3621996612922	18.9951153124677	16.1660357163331	16.3533085140195	15.57351	17.22921	9	CNOT3	>tr|H7C148|H7C148_HUMAN CCR4-NOT transcription complex subunit 3 (Fragment) OS=Homo sapiens GN=CNOT3 PE=1 SV=1	-1.65571	16.4013603334255	2.82032176514318	0.0115907866215246	0.157285031864152	-2.83236530368577	9	9	-	-	+
>sp|Q9NZC9|SMAL1_HUMAN SWI/SNF-related matrix-associated actin-dependent regulator of chromatin subfamily A-like protein 1 OS=Homo sapiens GN=SMARCAL1 PE=1 SV=1	15.4123020545277	15.8706860513036	16.4487186266415	15.2317067505656	15.134304329077	15.2459967473512	14.1619044551717	14.1903737534573	13.7223934743453	13.8866568512243	13.5253737564507	16.6561817120926	12.6452846972872	11.0914988691372	11.9779792008257	14.3671079528363	12.982730288032	13.5350980738745	15.04649	13.40755	46	SMARCAL1	>sp|Q9NZC9|SMAL1_HUMAN SWI/SNF-related matrix-associated actin-dependent regulator of chromatin subfamily A-like protein 1 OS=Homo sapiens GN=SMARCAL1 PE=1 SV=1	1.63894	14.227016535789	-2.81373775621094	0.0117539940307563	0.15905544011536	-2.84486564168724	9	9	-	-	+
>tr|M0R2I3|M0R2I3_HUMAN Transcription intermediary factor 1-beta (Fragment) OS=Homo sapiens GN=TRIM28 PE=1 SV=1	13.4746798567508	13.4726297290301	12.6955218954773	12.6955218954773	12.6955218954773	15.853913571755	18.4719124483669	18.5103428690618	18.5515955824924	18.2904950859382	18.2965497599361	18.3030631687015	16.4733619240351	15.7715957015782	15.8175451919017	19.7904732090254	19.619946968502	19.4238572659996	15.15796	17.97632	8	TRIM28	>tr|M0R2I3|M0R2I3_HUMAN Transcription intermediary factor 1-beta (Fragment) OS=Homo sapiens GN=TRIM28 PE=1 SV=1	-2.81836	16.5671404455282	2.81049682552565	0.0118351427057354	0.159708675734618	-2.85101530469662	9	9	-	-	+
>tr|H7C5P4|H7C5P4_HUMAN Replication factor C subunit 2 (Fragment) OS=Homo sapiens GN=RFC2 PE=1 SV=1	18.6667573045145	19.0253409046376	18.5338436648752	15.9669184602881	16.4950746649968	17.0271374340561	18.9727124988261	18.8968494598769	18.1200312475169	20.9760021147678	18.9606784859991	19.3699962474468	18.596589724657	17.877633784655	19.6810922702772	19.5535903000047	19.1924049920677	19.3032346472523	17.96719	19.27902	13	RFC2	>tr|H7C5P4|H7C5P4_HUMAN Replication factor C subunit 2 (Fragment) OS=Homo sapiens GN=RFC2 PE=1 SV=1	-1.31184	18.6231049003731	2.80815244691352	0.0118941789863277	0.159989805080241	-2.85546229871344	9	9	-	-	-
>tr|I3L4A5|I3L4A5_HUMAN Inositol polyphosphate 5-phosphatase K (Fragment) OS=Homo sapiens GN=INPP5K PE=1 SV=1	17.4680912046964	17.9898247259047	17.9405273621146	18.0970352720557	17.7375936459128	18.4006345517775	12.6955218954773	15.2103192222682	15.7055728217976	12.6955218954773	12.6955218954773	19.6384477781728	12.7215862908649	12.6955218954773	12.6955218954773	15.2290290837791	15.4682968502574	12.6955218954773	16.80501	14.05944	4	INPP5K	>tr|I3L4A5|I3L4A5_HUMAN Inositol polyphosphate 5-phosphatase K (Fragment) OS=Homo sapiens GN=INPP5K PE=1 SV=1	2.74557	15.4322272323592	-2.80705777164792	0.0119218422064733	0.159989805080241	-2.85753833966333	9	9	+	+	+
>tr|H3BNF2|H3BNF2_HUMAN Major vault protein (Fragment) OS=Homo sapiens GN=MVP PE=1 SV=1	23.8811501172889	24.6868957582646	24.662530072055	24.170826998095	24.5423271626257	24.4071722750624	23.8364825399297	22.8337971260432	23.0843188991137	23.4042401673838	23.6789390767583	23.9166267762704	21.1077593892177	22.5389662002413	21.9384334942876	23.1850553754461	23.6927665684539	23.1410143211267	24.01172	22.95598	2	MVP	>tr|H3BNF2|H3BNF2_HUMAN Major vault protein (Fragment) OS=Homo sapiens GN=MVP PE=1 SV=1	1.05574	23.4838501287591	-2.80546248240746	0.0119622672697684	0.160070703583533	-2.86056330855632	9	9	+	+	+
>tr|Q8IV96|Q8IV96_HUMAN DDX6 protein OS=Homo sapiens GN=DDX6 PE=1 SV=1	20.5839827530432	19.4250288924445	19.3211390733889	18.6484314831169	18.8398000009203	18.625934536269	19.8150549951564	20.1175419731038	19.9355601695829	20.4512665456729	20.2873370235377	19.8964914881278	20.1143860821251	20.0343353052857	19.7516257549523	20.3728848918845	20.3450989528144	20.3197191717163	19.47916	20.17479	9	DDX6	>tr|Q8IV96|Q8IV96_HUMAN DDX6 protein OS=Homo sapiens GN=DDX6 PE=1 SV=1	-0.69563	19.8269788385079	2.80422287757978	0.0119937702973253	0.160070703583533	-2.86291343779677	9	9	+	+	-
>tr|H7C507|H7C507_HUMAN Fibronectin type-III domain-containing protein 3A (Fragment) OS=Homo sapiens GN=FNDC3A PE=1 SV=1	16.2312885245348	17.2033010340535	16.9584883467518	16.255718620859	16.3456948767869	16.3943522486475	17.1443755588817	12.6955218954773	14.7861036189078	15.1281366490046	18.131044973086	18.2022199915504	20.0398770144935	20.7835187790951	18.9972751423782	17.7893852891683	16.7459013396628	16.5953756807079	16.00165	18.04586	8	FNDC3A	>tr|H7C507|H7C507_HUMAN Fibronectin type-III domain-containing protein 3A (Fragment) OS=Homo sapiens GN=FNDC3A PE=1 SV=1	-2.04421	17.023754421336	2.79915473960644	0.0121234037318971	0.160619435277534	-2.87251836177607	9	9	-	+	-
>tr|A0A087WU43|A0A087WU43_HUMAN Cadherin-1 OS=Homo sapiens GN=CDH1 PE=1 SV=1	16.8267367208728	17.9564701877835	18.4860680054592	19.3489591393662	19.0384614948222	18.9512549902226	17.2242640564974	17.8646108503716	17.1854973369046	16.2402171205334	16.9285428250767	17.9776068039773	15.3412290120093	15.7547922003469	15.3666705871298	17.6729080110088	17.9365765856888	17.8346995070464	18.09804	16.78369	19	CDH1	>tr|A0A087WU43|A0A087WU43_HUMAN Cadherin-1 OS=Homo sapiens GN=CDH1 PE=1 SV=1	1.31434	17.4408647463954	-2.79855250621992	0.0121388970976552	0.160619435277534	-2.87365930318102	9	9	+	+	-
>sp|Q9Y6D5|BIG2_HUMAN Brefeldin A-inhibited guanine nucleotide-exchange protein 2 OS=Homo sapiens GN=ARFGEF2 PE=1 SV=3	13.2775585599978	13.0149648105735	13.0149648105735	11.581281751638	12.1186880390218	11.13747680229	13.7583277928038	13.8009601369718	13.8321429832447	13.328104138156	14.3478704474038	12.7399315503579	15.2236127327373	16.3028295792963	15.5939247013607	13.6896520462417	13.4415575867634	13.6020897293262	12.83737	14.25217	90	ARFGEF2	>sp|Q9Y6D5|BIG2_HUMAN Brefeldin A-inhibited guanine nucleotide-exchange protein 2 OS=Homo sapiens GN=ARFGEF2 PE=1 SV=3	-1.4148	13.5447743443755	2.79645428868473	0.0121930259388206	0.160619435277534	-2.87763376911972	9	9	-	+	-
>tr|C9J2X8|C9J2X8_HUMAN Origin recognition complex subunit 4 (Fragment) OS=Homo sapiens GN=ORC4 PE=1 SV=1	14.3162807729123	15.9535960884375	16.5526340984372	16.3757328894504	16.9502781727565	16.2916454744584	12.6955218954773	12.6955218954773	12.6955218954773	12.6955218954773	12.6955218954773	15.823595572824	12.7215862908649	12.6955218954773	12.6955218954773	12.6955218954773	12.6955218954773	12.6955218954773	14.94741	13.04598	6	ORC4	>tr|C9J2X8|C9J2X8_HUMAN Origin recognition complex subunit 4 (Fragment) OS=Homo sapiens GN=ORC4 PE=1 SV=1	1.90143	13.9966982397175	-2.79409105049618	0.012254269844141	0.160619435277534	-2.88210904116702	9	9	-	-	+
>tr|Q5VUC9|Q5VUC9_HUMAN Ribonuclease P protein subunit p38 OS=Homo sapiens GN=RPP38 PE=1 SV=2	17.3960060331511	17.7378262057949	17.5532170900887	16.1065230777953	14.3067228012077	15.5917436560429	17.6731847693016	18.1989617009714	17.887334911029	19.2848500481806	19.6571498824173	18.1266223238411	17.4179396194943	17.3483040272194	18.4767102961948	17.6450510798566	17.8747123306107	20.3682953222373	16.93906	18.46663	8	RPP38	>tr|Q5VUC9|Q5VUC9_HUMAN Ribonuclease P protein subunit p38 OS=Homo sapiens GN=RPP38 PE=1 SV=2	-1.52757	17.7028419541908	2.79324972880395	0.012276144279149	0.160619435277534	-2.88370194764019	9	9	-	-	+
>tr|B4DDQ3|B4DDQ3_HUMAN Dynamin-1-like protein OS=Homo sapiens GN=DNM1L PE=1 SV=1	16.2923063768721	16.4953898422659	15.7977459477182	12.6955218954773	15.0183785674299	15.4899359463153	16.7324776168691	15.6606974664336	16.6809872183999	16.995833519482	16.530211943185	15.8296101212376	17.673385184007	16.5892209519297	17.3922906760097	17.4767612680124	16.9565938091034	16.6677745928133	15.65149	16.9013	10	DNM1L	>tr|B4DDQ3|B4DDQ3_HUMAN Dynamin-1-like protein OS=Homo sapiens GN=DNM1L PE=1 SV=1	-1.2498	16.2763957190867	2.79107705146265	0.0123328080258539	0.160619435277534	-2.88781481270927	9	9	+	+	-
>sp|P10606|COX5B_HUMAN Cytochrome c oxidase subunit 5B, mitochondrial OS=Homo sapiens GN=COX5B PE=1 SV=2	17.4599251513793	17.8322664323686	19.389820436451	17.6058288578048	17.5380857577824	17.8350082782955	18.6447935732089	17.7385557898307	18.090029348789	20.1948891387676	19.3651279446389	17.7906191288125	20.625377191951	18.1225023400884	22.4937052737192	18.7376006543763	18.8354825059085	18.8612027618064	18.01492	19.44739	7	COX5B	>sp|P10606|COX5B_HUMAN Cytochrome c oxidase subunit 5B, mitochondrial OS=Homo sapiens GN=COX5B PE=1 SV=2	-1.43247	18.7311566981099	2.79059428789288	0.0123454327004588	0.160619435277534	-2.88872853460985	9	9	-	-	-
>tr|F5GZK7|F5GZK7_HUMAN Condensin complex subunit 1 (Fragment) OS=Homo sapiens GN=NCAPD2 PE=1 SV=1	18.0550470148257	17.2155279802177	17.0558257736317	18.9202559332897	19.155017513282	19.190094109882	18.1176310527134	17.611816313755	18.0338427421038	18.4700295616501	18.7202963213761	19.2614257515541	18.9477762061258	19.3521371367207	18.6778403264017	19.69053654934	19.4494096361085	18.4396813158811	18.15056	19.00101	6	NCAPD2	>tr|F5GZK7|F5GZK7_HUMAN Condensin complex subunit 1 (Fragment) OS=Homo sapiens GN=NCAPD2 PE=1 SV=1	-0.850453	18.5757884021588	2.79048037552389	0.0123484134177093	0.160619435277534	-2.88894412765724	9	9	+	+	+
>tr|A0A0B4J1W0|A0A0B4J1W0_HUMAN Mediator of RNA polymerase II transcription subunit 24 OS=Homo sapiens GN=MED24 PE=1 SV=1	14.5062763523462	15.9483776228892	15.5347374549263	15.6486757422084	15.7068255533055	15.8053851315079	13.1848750782811	12.4924342565287	12.6955218954773	12.6955218954773	12.4496393337633	14.9904835137765	12.7215862908649	12.6955218954773	12.6955218954773	13.2096255772834	13.2324564576303	13.5435757350992	14.61368	13.1371	51	MED24	>tr|A0A0B4J1W0|A0A0B4J1W0_HUMAN Mediator of RNA polymerase II transcription subunit 24 OS=Homo sapiens GN=MED24 PE=1 SV=1	1.47658	13.8753912045733	-2.7900508976976	0.0123596576875846	0.160619435277534	-2.88975694007577	9	9	-	-	+
>tr|Q53SE3|Q53SE3_HUMAN Origin recognition complex subunit 4 (Fragment) OS=Homo sapiens GN=ORC4L PE=1 SV=1	14.0930459749438	15.707934805319	16.3171870300919	16.1684325481904	16.7229909517127	16.0807015607581	12.6955218954773	12.6955218954773	12.6955218954773	12.6955218954773	12.6955218954773	15.557096789883	12.7215862908649	12.6955218954773	12.6955218954773	12.6955218954773	12.6955218954773	12.6955218954773	14.79743	13.01637	7	ORC4L	>tr|Q53SE3|Q53SE3_HUMAN Origin recognition complex subunit 4 (Fragment) OS=Homo sapiens GN=ORC4L PE=1 SV=1	1.78106	13.9068997170298	-2.78982734918105	0.012365514366776	0.160619435277534	-2.89018000225765	9	9	-	-	-
>sp|Q9Y678|COPG1_HUMAN Coatomer subunit gamma-1 OS=Homo sapiens GN=COPG1 PE=1 SV=1	18.4794241503212	18.5043726186602	18.3015144068311	18.4844673223557	18.1954651486538	18.0911800347189	18.6110521185481	18.0401403151099	18.0819866020748	17.7390110271122	18.2802633600422	17.9476533250732	16.980625211416	17.1994964355145	16.7948976305591	18.2179988146581	18.2718334200403	17.9866878639865	18.30996	17.71316	49	COPG1	>sp|Q9Y678|COPG1_HUMAN Coatomer subunit gamma-1 OS=Homo sapiens GN=COPG1 PE=1 SV=1	0.596793	18.0115594336486	-2.78579148119807	0.0124717091895214	0.161566835313854	-2.8978158477017	9	9	-	-	-
>tr|B4DWJ1|B4DWJ1_HUMAN Focal adhesion kinase 1 OS=Homo sapiens GN=PTK2 PE=1 SV=1	16.0320967680697	17.1284085365622	17.0322670010366	17.2477145449581	17.2418120247737	17.4507112275037	16.9733303433004	16.9562620394717	17.4807465915581	17.5958330860464	18.1398700908255	16.7881670947113	16.8524443122278	18.0172399848063	18.1384219418309	18.0882466450307	17.8714734687145	17.9290757443174	17.06037	17.71342	16	PTK2	>tr|B4DWJ1|B4DWJ1_HUMAN Focal adhesion kinase 1 OS=Homo sapiens GN=PTK2 PE=1 SV=1	-0.653047	17.3868956358747	2.78257745331184	0.0125569060945996	0.161838582285959	-2.90389409170427	9	9	+	-	+
>sp|Q9BZM4|N2DL3_HUMAN NKG2D ligand 3 OS=Homo sapiens GN=ULBP3 PE=1 SV=1	20.3929350412226	20.3914696336508	20.4660339533846	21.2865675128072	21.4199028308139	21.2743882667948	15.8317954831157	13.8545581897179	13.655609300357	14.6290764000244	13.8890672047304	19.571312615396	14.9222984912353	12.6955218954773	12.6955218954773	16.6651524822037	15.8072822186063	16.144677091973	18.73036	15.22443	14	ULBP3	>sp|Q9BZM4|N2DL3_HUMAN NKG2D ligand 3 OS=Homo sapiens GN=ULBP3 PE=1 SV=1	3.50593	16.9773983614994	-2.78248693551054	0.0125593136109111	0.161838582285959	-2.90406524088397	9	9	-	-	-
>tr|E5RJ67|E5RJ67_HUMAN Double-stranded RNA-binding protein Staufen homolog 2 (Fragment) OS=Homo sapiens GN=STAU2 PE=1 SV=1	21.2524492659766	21.7063667054073	21.7343947556423	22.109265950767	22.2194002748998	22.3740096931628	19.6047709008867	20.5562678618487	20.6955741804316	19.3389252514255	19.9638187554321	21.2750064853615	19.0755593825772	21.22936914342	19.6356946742063	20.1959518557595	20.9760021147678	20.5266105386325	21.36139	20.24633	8	STAU2	>tr|E5RJ67|E5RJ67_HUMAN Double-stranded RNA-binding protein Staufen homolog 2 (Fragment) OS=Homo sapiens GN=STAU2 PE=1 SV=1	1.11506	20.8038576550336	-2.77961727742236	0.0126358688895179	0.162394314987507	-2.9094901471442	9	9	-	+	-
>sp|P00403|COX2_HUMAN Cytochrome c oxidase subunit 2 OS=Homo sapiens GN=MT-CO2 PE=1 SV=1	18.730971319816	17.1600740955643	17.0649931682131	18.2188601755164	18.3982488785488	18.0581832481126	16.8371544713312	16.5043603764659	16.4241109087448	12.9552670858546	18.1964548960003	16.512709772512	16.6250972017495	15.8655763501344	12.6955218954773	16.275480086683	12.6955218954773	17.2530353879189	17.48855	15.45274	8	MT-CO2	>sp|P00403|COX2_HUMAN Cytochrome c oxidase subunit 2 OS=Homo sapiens GN=MT-CO2 PE=1 SV=1	2.03581	16.4706456230067	-2.77589873339454	0.0127357379681615	0.162733208553875	-2.91651697365506	9	9	-	+	-
>tr|H0YLY0|H0YLY0_HUMAN Serine/threonine-protein kinase MRCK beta (Fragment) OS=Homo sapiens GN=CDC42BPB PE=1 SV=6	18.4166655424666	19.4611212633185	18.5467594308931	16.8676712327058	17.7457807652177	17.075139956224	18.2571550958011	18.1285048606776	18.5103428690618	19.0612373589629	19.4855863848109	18.8144182271889	19.6270532053301	18.3767190735808	20.02232492235	18.62187861117	18.3247678886168	18.81658212269	18.11213	19.01673	37	CDC42BPB	>tr|H0YLY0|H0YLY0_HUMAN Serine/threonine-protein kinase MRCK beta (Fragment) OS=Homo sapiens GN=CDC42BPB PE=1 SV=6	-0.904603	18.5644282672815	2.77466236499495	0.0127691109423275	0.162733208553875	-2.91885259011769	9	9	+	-	-
>sp|P30154|2AAB_HUMAN Serine/threonine-protein phosphatase 2A 65 kDa regulatory subunit A beta isoform OS=Homo sapiens GN=PPP2R1B PE=1 SV=3	13.2880968386141	13.8866568512243	13.7484946360204	15.8727546708116	15.8466958241616	15.936218207328	13.6203681442183	13.604480089074	12.6955218954773	13.5523841966646	13.9737030582756	12.6955218954773	12.7215862908649	12.6955218954773	12.6955218954773	13.3421381824592	13.2808376896873	12.6078333814455	14.2777	13.06278	29	PPP2R1B	>sp|P30154|2AAB_HUMAN Serine/threonine-protein phosphatase 2A 65 kDa regulatory subunit A beta isoform OS=Homo sapiens GN=PPP2R1B PE=1 SV=3	1.21492	13.6702408690421	-2.77339105465484	0.0128035147530496	0.162733208553875	-2.92125384289189	9	9	-	-	-
>tr|F8VU69|F8VU69_HUMAN Keratin, type II cytoskeletal 5 (Fragment) OS=Homo sapiens GN=KRT5 PE=1 SV=1	20.7609206302186	21.7743665093549	21.8070315329197	21.8724442007718	22.4247260495911	21.8881976939749	22.2298398732231	21.661794985896	20.4590823892148	21.7130731584844	20.0068670792561	19.0694705093374	19.4280895841612	20.2087013225583	18.2958958956293	19.5307122297122	22.0028735842834	22.2129440487371	21.65316	20.27429	4	KRT5	>tr|F8VU69|F8VU69_HUMAN Keratin, type II cytoskeletal 5 (Fragment) OS=Homo sapiens GN=KRT5 PE=1 SV=1	1.37886	20.9637239598514	-2.77308829007398	0.0128117212024096	0.162733208553875	-2.92182564934248	9	9	+	+	+
>sp|Q8N7B9|EFCB3_HUMAN EF-hand calcium-binding domain-containing protein 3 OS=Homo sapiens GN=EFCAB3 PE=2 SV=1	12.6955218954773	13.7846879659324	13.5593541045285	12.6955218954773	12.6955218954773	12.6955218954773	16.037355401983	16.5586981371437	15.8858459796741	15.3326642247976	15.5436803218767	14.3671079528363	15.5401227688913	15.9443145491671	16.0922654476149	15.9629715618871	15.8888408362946	15.7448309503325	14.06756	15.60187	22	EFCAB3	>sp|Q8N7B9|EFCB3_HUMAN EF-hand calcium-binding domain-containing protein 3 OS=Homo sapiens GN=EFCAB3 PE=2 SV=1	-1.53431	14.834712654715	2.77185638154989	0.0128451643132902	0.162733208553875	-2.92415203190475	9	9	-	-	-
>tr|M0R240|M0R240_HUMAN Unconventional myosin-IXb (Fragment) OS=Homo sapiens GN=MYO9B PE=1 SV=1	12.6955218954773	12.6955218954773	15.2630004987167	12.6955218954773	12.6955218954773	12.6955218954773	15.0210539222435	14.6396631931918	14.281392682786	16.2418524440488	16.4721957108331	12.6955218954773	17.0021864058121	12.6955218954773	17.0622154964815	15.8269257723748	15.5008710076095	15.3604544010194	13.63141	15.42864	7	MYO9B	>tr|M0R240|M0R240_HUMAN Unconventional myosin-IXb (Fragment) OS=Homo sapiens GN=MYO9B PE=1 SV=1	-1.79723	14.5300258224143	2.77087680224055	0.0128718172141858	0.162733208553875	-2.92600165262527	9	9	+	+	-
>sp|Q15904|VAS1_HUMAN V-type proton ATPase subunit S1 OS=Homo sapiens GN=ATP6AP1 PE=1 SV=2	17.4369817682002	18.2064362561351	18.0304615603507	17.5786832175627	17.544566926411	17.6574879557491	18.0587831395506	17.8076948582448	17.1537828448722	17.1723656135182	16.5953756807079	16.3918763792641	17.8350082782955	17.1807292841551	17.8519379218871	17.2481819274634	17.0218249470442	17.0146251921696	17.71943	17.14577	20	ATP6AP1	>sp|Q15904|VAS1_HUMAN V-type proton ATPase subunit S1 OS=Homo sapiens GN=ATP6AP1 PE=1 SV=2	0.573661	17.4326002084212	-2.76995806415181	0.0128968630121345	0.162733208553875	-2.92773618964365	9	9	-	-	-
>sp|Q9Y3E7|CHMP3_HUMAN Charged multivesicular body protein 3 OS=Homo sapiens GN=CHMP3 PE=1 SV=3	13.6652002851215	15.162736813371	15.341870400908	18.4001235849159	16.0746687957762	15.9995819154274	16.8649126929207	16.4905628107994	16.9125131521878	19.6799207576245	20.0681969855729	14.9597842477428	16.5933365381247	18.5310783383358	18.5257373097256	17.1240846694847	17.1933735878429	19.2287194070303	16.10135	17.98936	7	CHMP3	>sp|Q9Y3E7|CHMP3_HUMAN Charged multivesicular body protein 3 OS=Homo sapiens GN=CHMP3 PE=1 SV=3	-1.88801	17.0453556829396	2.76873703797833	0.0129302220053099	0.162733208553875	-2.93004112633681	9	9	-	-	-
>sp|Q9H936|GHC1_HUMAN Mitochondrial glutamate carrier 1 OS=Homo sapiens GN=SLC25A22 PE=1 SV=1	13.6691718997886	13.3065473156342	14.187129899421	13.8639821270603	12.6955218954773	14.2785305262022	14.9433277002268	14.1430508253282	17.0374154026644	14.4681373019761	16.2196940960613	16.4424341116388	14.4882395596995	14.6345693447493	14.619815830677	17.046383997174	16.8819330156649	16.9486283305424	14.23608	15.74998	15	SLC25A22	>sp|Q9H936|GHC1_HUMAN Mitochondrial glutamate carrier 1 OS=Homo sapiens GN=SLC25A22 PE=1 SV=1	-1.51391	14.9930285099992	2.76641761330794	0.0129938182393649	0.163111031025413	-2.9344185485405	9	9	-	-	+
>sp|Q9P0L0|VAPA_HUMAN Vesicle-associated membrane protein-associated protein A OS=Homo sapiens GN=VAPA PE=1 SV=3	22.6064141103216	23.5201262724499	23.178806120628	23.1188358301919	23.3987254937655	23.3034388375216	22.1633389226642	21.9447621166101	22.1827100934395	22.5706686320997	21.6211739516527	22.2657470351443	21.9196126613393	22.760715117414	22.2517407911902	21.6639388462275	22.1721999384131	22.143934764588	22.82413	22.15219	13	VAPA	>sp|Q9P0L0|VAPA_HUMAN Vesicle-associated membrane protein-associated protein A OS=Homo sapiens GN=VAPA PE=1 SV=3	0.671936	22.4881605297589	-2.76471916656226	0.0130405784074453	0.163276107998375	-2.93762320183636	9	9	-	-	-
>tr|M0R0Z0|M0R0Z0_HUMAN RuvB-like 2 OS=Homo sapiens GN=RUVBL2 PE=1 SV=1	20.0406330766215	20.0804653770582	20.4221851278015	20.0564345753934	20.1390983364994	19.2080500481469	19.975629637127	20.1477203662093	20.0141862513421	20.9674680480372	21.1866215556544	20.6464251683619	19.9409756476969	19.5282407298079	21.1480654453544	20.7165378932067	20.6379568524312	20.8170387896929	20.00938	20.62104	4	RUVBL2	>tr|M0R0Z0|M0R0Z0_HUMAN RuvB-like 2 OS=Homo sapiens GN=RUVBL2 PE=1 SV=1	-0.611659	20.3152073848024	2.76281469368163	0.0130932029817226	0.163513573483827	-2.9412157770287	9	9	+	+	+
>tr|F6VX93|F6VX93_HUMAN Vacuolar protein sorting-associated protein 53 homolog OS=Homo sapiens GN=VPS53 PE=1 SV=1	17.2515582206775	18.1889563634655	18.0172399848063	18.3131011386601	18.8485591760484	17.6940891141858	18.0098662104132	18.1945409998367	17.7254067769057	18.2211327427864	18.4248605967564	18.3213087537191	18.6314222714128	18.7782229204541	18.3206409912094	18.8825412431111	18.4955005885097	18.6869410695731	18.02704	18.52917	24	VPS53	>tr|F6VX93|F6VX93_HUMAN Vacuolar protein sorting-associated protein 53 homolog OS=Homo sapiens GN=VPS53 PE=1 SV=1	-0.502139	18.278104953474	2.76156427401399	0.0131278655768076	0.163525367758376	-2.94357408670146	9	9	-	-	-
>tr|K7ESJ4|K7ESJ4_HUMAN Programmed cell death protein 5 OS=Homo sapiens GN=PDCD5 PE=1 SV=1	19.1019577883099	19.0864280392868	19.372678814054	19.9312865897048	19.8219131637159	20.0376708375714	19.6193359008116	19.016356960286	19.1308245342891	19.4053630376846	20.1274613036133	19.9175499698701	20.0141862513421	20.7923245493605	21.2582028986184	19.9251449703934	19.6781626026115	19.9119166327516	19.45761	20.11448	3	PDCD5	>tr|K7ESJ4|K7ESJ4_HUMAN Programmed cell death protein 5 OS=Homo sapiens GN=PDCD5 PE=1 SV=1	-0.656873	19.7860424913486	2.75980963019251	0.0131766543159833	0.163525367758376	-2.94688274469752	9	9	+	-	+
>sp|P78316|NOP14_HUMAN Nucleolar protein 14 OS=Homo sapiens GN=NOP14 PE=1 SV=3	13.8079051508778	14.7197018227624	14.4568904227759	14.7833416492354	15.0878398266462	14.9482410771037	15.753516417882	15.5580752364589	15.363202371914	15.5709900043351	15.6912918488628	16.022583574432	15.5015013135032	15.202595296242	14.9627353893881	16.2342612678963	15.6692831553695	15.614422515684	14.94208	15.60774	37	NOP14	>sp|P78316|NOP14_HUMAN Nucleolar protein 14 OS=Homo sapiens GN=NOP14 PE=1 SV=3	-0.665661	15.2749099078539	2.75914677776358	0.0131951305395808	0.163525367758376	-2.94813246716745	9	9	-	+	+
>tr|H7C4W6|H7C4W6_HUMAN Phospholipid-transporting ATPase (Fragment) OS=Homo sapiens GN=ATP11B PE=1 SV=1	13.3013621139827	12.4843460934607	13.3877822228472	12.3996652340034	12.5739233393347	12.6955218954773	13.4621427180189	13.9245434485798	13.576811778183	14.5462378312843	14.9797618453355	12.709181302494	14.7229106568609	14.3962046989353	14.268292468279	13.3935778859186	13.3606420044488	13.3144821903475	13.08957	13.9657	41	ATP11B	>tr|H7C4W6|H7C4W6_HUMAN Phospholipid-transporting ATPase (Fragment) OS=Homo sapiens GN=ATP11B PE=1 SV=1	-0.876132	13.5276327626551	2.75215198437787	0.0133916247648104	0.165440622529608	-2.96131385457225	9	9	-	+	-
>sp|Q9BUP0|EFHD1_HUMAN EF-hand domain-containing protein D1 OS=Homo sapiens GN=EFHD1 PE=1 SV=1	15.1183582295536	16.044374601133	15.991432517833	16.8380337843169	17.5197572877341	16.7605860398181	15.4190792723794	15.4838898400309	15.4877951759948	15.6076846617706	13.0066394085968	15.4000428224253	12.7215862908649	16.9125131521878	12.6955218954773	13.876910159801	15.0630827740276	15.6213760364549	16.0737	14.54504	12	EFHD1	>sp|Q9BUP0|EFHD1_HUMAN EF-hand domain-containing protein D1 OS=Homo sapiens GN=EFHD1 PE=1 SV=1	1.52866	15.3093702194667	-2.75122813445445	0.0134177861829282	0.165440622529608	-2.96305393425352	9	9	-	-	-
>tr|H0YJD9|H0YJD9_HUMAN Actin-related protein 10 (Fragment) OS=Homo sapiens GN=ACTR10 PE=1 SV=1	20.3428148123733	19.9510626722287	19.7432285879152	20.2230618169164	19.909813840901	16.5168162815743	18.4611710867157	19.6012394455955	19.0374975492424	17.5661728126846	18.2144770720491	18.4767102961948	18.7719797364943	17.5876051140759	17.978994825391	17.7935577627555	18.5537476733325	18.5131369672884	19.30963	18.16182	6	ACTR10	>tr|H0YJD9|H0YJD9_HUMAN Actin-related protein 10 (Fragment) OS=Homo sapiens GN=ACTR10 PE=1 SV=1	1.14781	18.7357271307627	-2.74490189783105	0.0135982541115554	0.167137299650823	-2.97496393603096	9	9	+	-	-
>tr|E9PK85|E9PK85_HUMAN Ras-related protein R-Ras2 (Fragment) OS=Homo sapiens GN=RRAS2 PE=1 SV=1	20.982125671181	21.1077593892177	20.9718551572246	21.4426016312178	20.5084552765458	21.6300578168678	20.2737991718056	20.2249750480991	20.2048986318294	20.0774278844672	19.9268268630104	20.6895072398381	19.7144016805236	20.1964812284966	19.7410294275782	19.930613723406	20.5556939122044	20.8001888570803	20.81628	20.18135	10	RRAS2	>tr|E9PK85|E9PK85_HUMAN Ras-related protein R-Ras2 (Fragment) OS=Homo sapiens GN=RRAS2 PE=1 SV=1	0.634929	20.4988165894774	-2.74399895593582	0.0136242014536282	0.167137299650823	-2.97666305863733	9	9	-	+	-
>tr|H0Y4W0|H0Y4W0_HUMAN COMM domain-containing protein 3 (Fragment) OS=Homo sapiens GN=COMMD3 PE=1 SV=1	17.4359944867043	15.0020369788184	15.2639393708969	18.201662456638	18.315927414436	18.1495487204533	17.2647064944268	16.9551509053073	16.8729203192629	15.2435641543153	15.5891531709249	15.6184052691189	12.7215862908649	12.6955218954773	12.6955218954773	17.4893518571622	17.6746677217794	15.5466837877938	17.05132	15.0305	8	COMMD3	>tr|H0Y4W0|H0Y4W0_HUMAN COMM domain-containing protein 3 (Fragment) OS=Homo sapiens GN=COMMD3 PE=1 SV=1	2.02083	16.0409079549921	-2.74243917675432	0.0136691359252232	0.167266151951472	-2.97959772770652	9	9	-	-	-
>tr|H3BTP7|H3BTP7_HUMAN 60S ribosomal protein L4 (Fragment) OS=Homo sapiens GN=RPL4 PE=1 SV=1	24.9413121244993	25.0436604353569	25.2035262970578	24.4071722750624	24.7097721560476	24.4114166362555	25.3096047618546	25.3639111499126	25.2671334288852	25.175101321875	25.3588063324458	25.4670233681412	25.4330773240057	25.1482934214065	25.325133255765	25.4974432561414	25.7636284108089	25.3755528617805	24.96195	25.39378	6	RPL4	>tr|H3BTP7|H3BTP7_HUMAN 60S ribosomal protein L4 (Fragment) OS=Homo sapiens GN=RPL4 PE=1 SV=1	-0.431839	25.1778649342946	2.74111137354613	0.0137074995972725	0.167314153375753	-2.98209547679038	9	9	+	+	+
>tr|R4GN54|R4GN54_HUMAN Protein COMMD3-BMI1 (Fragment) OS=Homo sapiens GN=COMMD3-BMI1 PE=4 SV=1	17.6543639404678	15.2621567648924	15.4666003631489	18.3826576356137	18.4881757593352	18.3550064629043	17.4622125022984	17.1467957800248	17.047396153773	15.4560140456386	15.8020758333048	15.8524261668015	12.7215862908649	12.6955218954773	12.6955218954773	17.6934753078095	17.877633784655	15.7652886196618	17.25171	15.17328	7	COMMD3-BMI1	>tr|R4GN54|R4GN54_HUMAN Protein COMMD3-BMI1 (Fragment) OS=Homo sapiens GN=COMMD3-BMI1 PE=4 SV=1	2.07842	16.212494955675	-2.73607017598053	0.0138540955573753	0.168679689768744	-2.99157463375431	9	9	-	-	-
>sp|O15173|PGRC2_HUMAN Membrane-associated progesterone receptor component 2 OS=Homo sapiens GN=PGRMC2 PE=1 SV=1	22.8928639682543	22.9583978474722	22.905162483453	22.6927826810666	22.4275625073735	22.9322135076269	23.0843188991137	23.1470151912271	22.1806757900677	21.4846377175509	21.6145971447543	22.080343990689	22.4645289395948	22.8692845756689	22.298152477103	20.8302528119762	22.6229947230989	22.7301555249399	22.80233	22.11055	9	PGRMC2	>sp|O15173|PGRC2_HUMAN Membrane-associated progesterone receptor component 2 OS=Homo sapiens GN=PGRMC2 PE=1 SV=1	0.691783	22.4564411545017	-2.7338898205254	0.0139179641916181	0.168984378191191	-2.99567251575101	9	9	-	+	-
>sp|Q8N7R7|CCYL1_HUMAN Cyclin-Y-like protein 1 OS=Homo sapiens GN=CCNYL1 PE=1 SV=2	17.8887683943425	17.1577639587254	16.8010820469089	17.5016227713777	17.7900659426248	17.0418946156919	18.2379468188563	18.3470847650878	18.4128191598827	19.1538711112619	19.543033054047	17.8881606378704	18.0235488864721	18.4949808142083	18.1189663780069	18.6519428248886	18.1705436515731	17.9646226809161	17.68656	18.44552	17	CCNYL1	>sp|Q8N7R7|CCYL1_HUMAN Cyclin-Y-like protein 1 OS=Homo sapiens GN=CCNYL1 PE=1 SV=2	-0.758958	18.0660399173746	2.73237905147575	0.0139623843020764	0.168984378191191	-2.9985112558798	9	9	-	-	-
>tr|H0YC30|H0YC30_HUMAN RB1-inducible coiled-coil protein 1 (Fragment) OS=Homo sapiens GN=RB1CC1 PE=1 SV=1	18.4545145548184	18.4406858206148	18.3379935891464	18.2947425912971	17.9071377154598	17.8014039080823	17.1455594410688	17.0529366995421	17.4025815901715	17.6065846609654	16.9025649181661	17.421685157221	17.7833562994867	15.614422515684	18.1122441871256	16.5968292262758	15.8058389475819	16.6365860773923	17.87084	16.94223	5	RB1CC1	>tr|H0YC30|H0YC30_HUMAN RB1-inducible coiled-coil protein 1 (Fragment) OS=Homo sapiens GN=RB1CC1 PE=1 SV=1	0.928605	17.4065371055611	-2.73117925471724	0.0139977579273001	0.168984378191191	-3.00076527851552	9	9	+	-	-
>tr|G3V380|G3V380_HUMAN Alpha-actinin-1 (Fragment) OS=Homo sapiens GN=ACTN1 PE=1 SV=1	17.8686866832912	19.3399254958034	18.7242998103322	20.6048158118715	20.7873473449805	20.1940861669529	19.1780605218949	20.1991214189452	19.1807834225228	18.6333453488083	17.5564644441303	19.1807834225228	12.7215862908649	12.6955218954773	12.6955218954773	19.2828110546541	19.1440124552026	18.8101528793939	19.56413	16.74669	4	ACTN1	>tr|G3V380|G3V380_HUMAN Alpha-actinin-1 (Fragment) OS=Homo sapiens GN=ACTN1 PE=1 SV=1	2.81744	18.1554070201737	-2.73027459609038	0.0140244867983019	0.168984378191191	-3.0024645996753	9	9	+	-	+
>sp|Q15274|NADC_HUMAN Nicotinate-nucleotide pyrophosphorylase [carboxylating] OS=Homo sapiens GN=QPRT PE=1 SV=3	21.3626822647087	20.2512619709778	20.2598410332264	17.6079575328047	19.3354326514684	19.5495585465773	22.0621108049691	22.2421451220973	20.7785090301582	21.4395962268435	20.8446951095936	16.0033637400402	16.9551509053073	16.7634320410984	15.8956321090323	16.0108092411415	14.6606856880917	21.1726136455324	20.38328	17.74955	13	QPRT	>sp|Q15274|NADC_HUMAN Nicotinate-nucleotide pyrophosphorylase [carboxylating] OS=Homo sapiens GN=QPRT PE=1 SV=3	2.63372	19.0664154257594	-2.72826106959827	0.014084153847728	0.168984378191191	-3.00624610695134	9	9	-	-	-
>sp|Q92841|DDX17_HUMAN Probable ATP-dependent RNA helicase DDX17 OS=Homo sapiens GN=DDX17 PE=1 SV=2	21.7429915934471	21.6235441904231	21.6242231004992	20.9546987977726	21.3281645803668	21.3588218704229	22.3778996400306	22.2382857346749	22.3432300073794	22.2964965655563	22.2684487913215	22.2534116661491	22.1017054454955	21.9300382975245	22.090221809372	22.3901106319725	22.4515394902287	22.4395243786735	21.73243	22.24683	38	DDX17	>sp|Q92841|DDX17_HUMAN Probable ATP-dependent RNA helicase DDX17 OS=Homo sapiens GN=DDX17 PE=1 SV=2	-0.514404	21.9896309217395	2.72813731609412	0.0140878289764167	0.168984378191191	-3.00647848982606	9	9	-	+	+
>sp|Q9NRC1|ST7_HUMAN Suppressor of tumorigenicity 7 protein OS=Homo sapiens GN=ST7 PE=1 SV=1	12.6955218954773	13.0746594835823	12.6537828082549	15.1521747026586	14.151277538681	14.8260938586873	16.4544125006345	16.3503723329267	16.4639287254296	16.9766192568081	17.092977180248	15.0547980302156	15.3694122449375	15.8439504452122	16.1469716756155	16.5077314200584	16.6157516152664	15.971102801215	14.64691	16.17548	26	ST7	>sp|Q9NRC1|ST7_HUMAN Suppressor of tumorigenicity 7 protein OS=Homo sapiens GN=ST7 PE=1 SV=1	-1.52857	15.4111965842172	2.72505419204785	0.0141796863452066	0.16910260010325	-3.01226672163991	9	9	-	-	-
>tr|H7C3S9|H7C3S9_HUMAN COP9 signalosome complex subunit 8 (Fragment) OS=Homo sapiens GN=COPS8 PE=1 SV=1	17.7727811665294	15.9435116843068	16.1554119931862	12.6955218954773	12.6955218954773	12.6955218954773	18.090029348789	17.8942642837317	18.2911472060621	19.3507255880571	19.6437398376787	16.2682412814609	17.6460726103841	16.6660146145384	17.1716613030863	19.6298857073224	19.0421438407209	18.8603117903187	15.80375	18.2532	5	COPS8	>tr|H7C3S9|H7C3S9_HUMAN COP9 signalosome complex subunit 8 (Fragment) OS=Homo sapiens GN=COPS8 PE=1 SV=1	-2.44945	17.028472663478	2.72419512824174	0.0142053830454608	0.16910260010325	-3.01387910166827	9	9	+	-	+
>tr|S4R349|S4R349_HUMAN Nucleolar and coiled-body phosphoprotein 1 (Fragment) OS=Homo sapiens GN=NOLC1 PE=1 SV=1	16.9389409690925	17.0225006878084	16.1976457972814	16.6394907281222	16.924748720954	16.7284418063987	15.3976366031267	17.0565898515565	17.2470121592925	16.3513302323859	17.1118203684639	16.5299179851235	15.4008890772325	14.3496818035586	14.7126850429153	16.3371405830635	15.4602890059393	15.2114373337351	16.68367	15.71835	10	NOLC1	>tr|S4R349|S4R349_HUMAN Nucleolar and coiled-body phosphoprotein 1 (Fragment) OS=Homo sapiens GN=NOLC1 PE=1 SV=1	0.965313	16.2010110420028	-2.72412369852954	0.0142075216916585	0.16910260010325	-3.01401316011627	9	9	+	-	-
>sp|P01033|TIMP1_HUMAN Metalloproteinase inhibitor 1 OS=Homo sapiens GN=TIMP1 PE=1 SV=1	17.8350082782955	17.6543639404678	17.7961760543078	15.5539202705876	15.1384887182578	14.4105514270526	15.7776923771425	16.511691691892	14.1113328824986	15.2290290837791	15.2794386096979	15.5659411697969	12.7215862908649	12.6955218954773	15.0792562896898	14.9308655816787	14.7519645670175	14.2910326059124	16.08769	14.50496	10	TIMP1	>sp|P01033|TIMP1_HUMAN Metalloproteinase inhibitor 1 OS=Homo sapiens GN=TIMP1 PE=1 SV=1	1.58273	15.296325651912	-2.72255902012691	0.0142544465426888	0.16910260010325	-3.016949412453	9	9	-	-	-
>tr|H0Y9V3|H0Y9V3_HUMAN Protein transport protein Sec31A (Fragment) OS=Homo sapiens GN=SEC31A PE=1 SV=1	15.6385035662769	18.1927303222597	18.2789330079169	16.3986310868561	16.3055905371444	16.5365139741955	16.5719796988585	16.5961495073394	16.7798978057723	18.4064167697249	17.9476533250732	18.1389294735736	17.7390110271122	17.4616985600565	18.0948608773743	17.0873262075881	16.8010820469089	17.8102652734652	16.81099	17.7208	5	SEC31A	>tr|H0Y9V3|H0Y9V3_HUMAN Protein transport protein Sec31A (Fragment) OS=Homo sapiens GN=SEC31A PE=1 SV=1	-0.909813	17.2658985037498	2.720929712709	0.0143034674684357	0.16910260010325	-3.02000629982951	9	9	+	-	-
>tr|E9PRV0|E9PRV0_HUMAN Vacuolar protein sorting-associated protein 51 homolog (Fragment) OS=Homo sapiens GN=VPS51 PE=1 SV=1	19.716696546339	18.0031608782285	17.9942844518632	16.0550330728659	16.1472368158848	15.1308309196984	16.3779619786742	15.9289405339002	16.0012428812022	17.9524239544102	17.7640024412591	17.8961867399839	21.7110737528424	20.4981933685474	20.6644851173441	17.4347460470468	17.3531319336899	17.5986779401651	16.81727	18.76366	10	VPS51	>tr|E9PRV0|E9PRV0_HUMAN Vacuolar protein sorting-associated protein 51 homolog (Fragment) OS=Homo sapiens GN=VPS51 PE=1 SV=1	-1.94639	17.7904616318859	2.72082778762088	0.0143065394488341	0.16910260010325	-3.02019750851835	9	9	-	-	-
>sp|P46977|STT3A_HUMAN Dolichyl-diphosphooligosaccharide--protein glycosyltransferase subunit STT3A OS=Homo sapiens GN=STT3A PE=1 SV=2	19.8471355405659	19.7399163554917	19.560677182424	18.8915146345034	19.0039968660563	18.8699970347289	19.8189991111999	19.3239135698863	19.1448138035301	19.0410353327464	18.8869805784376	19.1839286751057	18.5334488179997	18.5970555429837	18.2784842212569	18.1626393933237	19.0975138422894	19.4102856256004	19.35566	18.79904	30	STT3A	>sp|P46977|STT3A_HUMAN Dolichyl-diphosphooligosaccharide--protein glycosyltransferase subunit STT3A OS=Homo sapiens GN=STT3A PE=1 SV=2	0.556621	19.0773520071183	-2.71610599532089	0.0144495473953191	0.170378401083641	-3.02905262050961	9	9	-	+	-
>sp|O00220|TR10A_HUMAN Tumor necrosis factor receptor superfamily member 10A OS=Homo sapiens GN=TNFRSF10A PE=1 SV=3	17.1086124623176	18.6769774157197	18.9760513208645	17.7875269411324	18.0385122416343	16.7237308088623	17.1331931906983	15.9879253054638	16.8309212916112	18.5711558454912	15.2905698643845	18.8612027618064	12.7215862908649	16.3232363800702	12.6955218954773	15.4666003631489	14.375450475243	13.2247497515021	17.47372	15.28112	20	TNFRSF10A	>sp|O00220|TR10A_HUMAN Tumor necrosis factor receptor superfamily member 10A OS=Homo sapiens GN=TNFRSF10A PE=1 SV=3	2.1926	16.3774180336829	-2.71390520510182	0.0145166692364115	0.170599929270204	-3.03317801246402	9	9	-	-	-
>tr|B4DIH5|B4DIH5_HUMAN COP9 signalosome complex subunit 2 OS=Homo sapiens GN=COPS2 PE=1 SV=1	16.5293935211984	16.9700444738396	16.5438407303193	17.8741520576577	15.9990563588651	17.9676297043982	17.6605849144943	17.2689754662076	17.8616259686006	17.8211926822961	18.4263335775553	17.7152677052321	19.8101509690084	19.0666311883375	18.8495831939032	17.2311462411029	17.4299605150258	17.4420518023759	17.18614	18.19915	18	COPS2	>tr|B4DIH5|B4DIH5_HUMAN COP9 signalosome complex subunit 2 OS=Homo sapiens GN=COPS2 PE=1 SV=1	-1.013	17.6926456150232	2.71220883475298	0.0145686105100812	0.170599929270204	-3.03635703705701	9	9	+	-	-
>tr|D6RFF0|D6RFF0_HUMAN La-related protein 7 (Fragment) OS=Homo sapiens GN=LARP7 PE=1 SV=1	12.6955218954773	12.6955218954773	12.6955218954773	12.6955218954773	12.6955218954773	12.6955218954773	13.7136088423157	12.6955218954773	13.2280833057998	12.6955218954773	12.7890659260109	12.6955218954773	15.0693528431247	14.5146767650543	12.6955218954773	16.1928177597106	16.2945577115963	16.1690681282214	12.86782	14.34623	17	LARP7	>tr|D6RFF0|D6RFF0_HUMAN La-related protein 7 (Fragment) OS=Homo sapiens GN=LARP7 PE=1 SV=1	-1.47842	13.6070250131448	2.71204335591165	0.0145736868355568	0.170599929270204	-3.03666710826092	9	9	+	-	+
>sp|O00160|MYO1F_HUMAN Unconventional myosin-If OS=Homo sapiens GN=MYO1F PE=1 SV=3	17.6741291091517	16.8352278206914	17.0773475908445	16.8103706395434	16.5535272965008	16.4494182722254	15.3879794476154	16.0433549412144	16.9881769682143	15.9435116843068	13.3370683827632	16.3684515921274	15.88689767809	16.1480788684819	15.1119579003004	15.3953020909582	16.1299421923531	16.2926778861814	16.64661	15.62377	55	MYO1F	>sp|O00160|MYO1F_HUMAN Unconventional myosin-If OS=Homo sapiens GN=MYO1F PE=1 SV=3	1.02285	16.1351900200869	-2.70293319370868	0.0148557839406473	0.173484130729963	-3.05372689296305	9	9	-	-	-
>sp|P61077|UB2D3_HUMAN Ubiquitin-conjugating enzyme E2 D3 OS=Homo sapiens GN=UBE2D3 PE=1 SV=1	18.7554072579262	17.4045957016572	17.8588397958988	19.4819085044707	17.3259149235293	18.3807675386448	18.0145478171528	17.7489654998117	18.0028249409768	23.317758082668	23.396531121035	18.7408154644968	20.6594270194372	19.1428270910359	20.2048986318294	18.3934853402916	18.066644524903	18.2168840816118	18.1082	20.01547	4	UBE2D3	>sp|P61077|UB2D3_HUMAN Ubiquitin-conjugating enzyme E2 D3 OS=Homo sapiens GN=UBE2D3 PE=1 SV=1	-1.90728	19.0618357409654	2.70058976093177	0.0149291895093602	0.173923267713362	-3.05811182542883	9	9	-	-	-
>tr|H0Y4H1|H0Y4H1_HUMAN Receptor-type tyrosine-protein phosphatase F (Fragment) OS=Homo sapiens GN=PTPRF PE=1 SV=1	12.6774598807803	12.5800433918376	12.7989212861824	12.3092364066301	12.6955218954773	12.3464850201743	12.6955218954773	11.0914988691372	12.6955218954773	13.3325964153026	13.4916551974359	13.066669527097	15.1473967841545	14.4943046076173	14.2984336465773	11.9251648107861	12.6955218954773	12.6272265976159	12.43225	13.45322	66	PTPRF	>tr|H0Y4H1|H0Y4H1_HUMAN Receptor-type tyrosine-protein phosphatase F (Fragment) OS=Homo sapiens GN=PTPRF PE=1 SV=1	-1.02097	12.9427322235132	2.6972576818398	0.0150341613419801	0.174603621110108	-3.06434425895467	9	9	-	-	-
>sp|P31930|QCR1_HUMAN Cytochrome b-c1 complex subunit 1, mitochondrial OS=Homo sapiens GN=UQCRC1 PE=1 SV=3	18.1076790452249	17.4574036714968	17.8574599888776	18.4281013383437	18.6828928215821	18.5262410250193	17.8487877921233	18.4730263387147	17.9109550087285	16.6825931659558	17.7413616315605	16.8358088811185	17.9419288444241	16.8900649237113	16.8813320613443	18.5706857347433	17.0005083829797	18.1646941818599	18.14362	17.41211	22	UQCRC1	>sp|P31930|QCR1_HUMAN Cytochrome b-c1 complex subunit 1, mitochondrial OS=Homo sapiens GN=UQCRC1 PE=1 SV=3	0.731508	17.7778624909893	-2.69645757256834	0.0150594724670924	0.174603621110108	-3.06584038765529	9	9	-	-	-
>tr|F8WEV5|F8WEV5_HUMAN Splicing factor 1 OS=Homo sapiens GN=SF1 PE=1 SV=1	20.9037643314116	20.5038748515778	20.5666828732087	20.8611721398664	20.9465734453281	20.1446727892412	21.2018527876881	21.0213291184772	20.9347755492425	20.9538379049655	21.7680663612335	21.2043236433575	21.6576864252838	21.4754000295575	21.7800639101519	21.7927853201394	20.4018782612873	20.9980108162709	20.78719	21.33689	7	SF1	>tr|F8WEV5|F8WEV5_HUMAN Splicing factor 1 OS=Homo sapiens GN=SF1 PE=1 SV=1	-0.549706	21.0620416976827	2.69484852476744	0.0151104975288504	0.174778088083703	-3.06884865815989	9	9	-	-	+
>sp|Q9BXP2|S12A9_HUMAN Solute carrier family 12 member 9 OS=Homo sapiens GN=SLC12A9 PE=1 SV=1	17.2163195235985	16.0505165388964	15.2305693194009	16.2638525021	17.1723656135182	17.4305874168658	16.0996294637386	16.6811863458001	16.5075366770986	16.7377016221508	16.925172567208	17.9012397813965	17.9257292571155	17.2735016259135	17.6160157615127	17.5677264902052	17.4091202593633	16.3766597596536	16.51695	17.30365	34	SLC12A9	>sp|Q9BXP2|S12A9_HUMAN Solute carrier family 12 member 9 OS=Homo sapiens GN=SLC12A9 PE=1 SV=1	-0.7867	16.9103016958631	2.69113724635066	0.0152288186029979	0.175072172420908	-3.07578471582318	9	9	-	+	-
>tr|G3V226|G3V226_HUMAN Calmodulin OS=Homo sapiens GN=CALM1 PE=1 SV=1	22.8627699938056	23.5432028362914	23.7271297299789	25.8956085122432	24.9033587054698	26.0776334962717	23.1534669882188	23.355607095065	22.1595129135286	21.7380014628655	23.8364825399297	23.7684617776811	18.8170617227421	18.6531882776771	21.5485756419989	23.1813239956329	22.7120627519522	22.8627699938056	23.96425	21.90199	2	CALM1	>tr|G3V226|G3V226_HUMAN Calmodulin OS=Homo sapiens GN=CALM1 PE=1 SV=1	2.06226	22.9331232463977	-2.69096008684351	0.0152344888171691	0.175072172420908	-3.07611572291192	9	9	+	-	+
>tr|H3BLT0|H3BLT0_HUMAN Receptor tyrosine-protein kinase erbB-4 (Fragment) OS=Homo sapiens GN=ERBB4 PE=1 SV=1	13.1421459362747	14.6471956081504	11.3189862147536	15.6543027286424	16.7158146326452	16.1157963884163	14.3788082683212	14.4482653655956	14.4943046076173	16.4249460580264	16.4453061945453	15.6401975376041	16.9546951847623	17.1278562082324	17.0891178156813	15.4560140456386	14.4928808957288	15.6912918488628	14.54618	16.14692	36	ERBB4	>tr|H3BLT0|H3BLT0_HUMAN Receptor tyrosine-protein kinase erbB-4 (Fragment) OS=Homo sapiens GN=ERBB4 PE=1 SV=1	-1.60074	15.346551418861	2.69066192508291	0.01524403642117	0.175072172420908	-3.0766727938863	9	9	-	+	+
>tr|A2AB13|A2AB13_HUMAN Flotillin-1 (Fragment) OS=Homo sapiens GN=FLOT1 PE=1 SV=1	20.2629901735284	21.2301345918999	20.5271793556868	21.3579088032099	20.8921280799674	21.5400902791919	20.803994066504	20.823892152305	20.992996342152	20.222541086195	19.4836582852722	20.3529201392749	20.02232492235	19.7510631365872	21.4377733391996	20.6014295092422	20.625377191951	20.2019067079083	20.93681	20.29989	10	FLOT1	>tr|A2AB13|A2AB13_HUMAN Flotillin-1 (Fragment) OS=Homo sapiens GN=FLOT1 PE=1 SV=1	0.636924	20.6183504534681	-2.68817667695326	0.0153238408997847	0.175573629931968	-3.08131521810401	9	9	-	+	-
>tr|I3L379|I3L379_HUMAN Active breakpoint cluster region-related protein (Fragment) OS=Homo sapiens GN=ABR PE=1 SV=1	17.4009857395133	16.1113889847228	15.7930239839415	15.3258740795827	15.4694612385513	15.3741919285306	15.2533076260047	14.3067228012077	12.6955218954773	15.3983801629707	12.6955218954773	14.8614388733793	12.7215862908649	16.2373675523729	12.6955218954773	12.6955218954773	12.6955218954773	12.6955218954773	15.30339	13.63293	5	ABR	>tr|I3L379|I3L379_HUMAN Active breakpoint cluster region-related protein (Fragment) OS=Homo sapiens GN=ABR PE=1 SV=1	1.67046	14.4681589241392	-2.68600437619533	0.015393923350122	0.175631606159787	-3.0853717506685	9	9	-	+	-
>sp|Q13043|STK4_HUMAN Serine/threonine-protein kinase 4 OS=Homo sapiens GN=STK4 PE=1 SV=2	16.4805156786814	15.5773428695648	16.9612383451771	16.5305058413629	16.710483638729	16.9674439327403	17.2660721301985	18.1538599423557	17.7445150835214	18.3511944488845	17.6001392633852	17.7473069732223	16.800720198824	17.2621901744136	17.4823694980732	17.7549757921238	18.4916730752316	18.5586123069284	16.93244	17.78324	26	STK4	>sp|Q13043|STK4_HUMAN Serine/threonine-protein kinase 4 OS=Homo sapiens GN=STK4 PE=1 SV=2	-0.8508	17.3578421774121	2.68577914840818	0.0154012071272271	0.175631606159787	-3.08579226881007	9	9	+	-	+
>sp|P43155|CACP_HUMAN Carnitine O-acetyltransferase OS=Homo sapiens GN=CRAT PE=1 SV=5	13.5291156732681	12.6955218954773	13.2425259003659	12.6955218954773	12.0111766922808	11.7350629092241	14.232817830749	14.3171112154447	13.7791877447492	15.8339246881313	12.9552670858546	12.6955218954773	14.5316792787505	15.8598228619034	15.8256446672598	13.7642295085998	14.232817830749	14.4210265533391	13.13756	14.45777	28	CRAT	>sp|P43155|CACP_HUMAN Carnitine O-acetyltransferase OS=Homo sapiens GN=CRAT PE=1 SV=5	-1.32021	13.7976653403945	2.68245721126093	0.0155090207273294	0.176295745879926	-3.0919930589527	9	9	-	-	-
>tr|H3BR65|H3BR65_HUMAN Gamma-interferon-inducible protein 16 (Fragment) OS=Homo sapiens GN=IFI16 PE=1 SV=1	17.2423507123434	18.4981403832647	18.2510215889401	20.4520880779259	20.7087394998351	20.410510041453	19.809549738568	19.3448898155676	19.8270564854741	15.2165444055465	15.5194991436697	18.4317865780029	16.4283859362376	17.8036606703238	17.6472429055742	19.5588797230195	20.1318230316926	17.9109550087285	19.39382	17.62764	4	IFI16	>tr|H3BR65|H3BR65_HUMAN Gamma-interferon-inducible protein 16 (Fragment) OS=Homo sapiens GN=IFI16 PE=1 SV=1	1.76617	18.5107290970093	-2.68175125434563	0.0155320253677663	0.176295745879926	-3.0933104415605	9	9	+	+	+
>sp|Q969P0|IGSF8_HUMAN Immunoglobulin superfamily member 8 OS=Homo sapiens GN=IGSF8 PE=1 SV=1	12.6955218954773	12.1332249439597	13.3998443376439	12.6955218954773	12.6955218954773	12.6955218954773	13.6145964851081	12.6955218954773	13.6874457169723	14.268292468279	13.9654599163166	12.2285964740883	14.7459478819069	15.1952875082389	15.0448701854403	13.0430941643587	12.6955218954773	14.5215016234265	12.92364	13.96762	27	IGSF8	>sp|Q969P0|IGSF8_HUMAN Immunoglobulin superfamily member 8 OS=Homo sapiens GN=IGSF8 PE=1 SV=1	-1.04398	13.4456273932557	2.6792142435346	0.0156149671255231	0.176824033323522	-3.09804367187405	9	9	-	+	-
>sp|P21283|VATC1_HUMAN V-type proton ATPase subunit C 1 OS=Homo sapiens GN=ATP6V1C1 PE=1 SV=4	17.378968134367	17.4085033206283	17.8483595982075	20.0890051070611	20.0348919477917	19.9801627461796	17.7534696018127	17.4793606798787	17.7869228141296	16.7784663436182	16.6147191554303	17.4497577380345	16.8167508628572	17.17995765853	16.9800956528071	18.2239378388043	18.0028249409768	17.1863113256369	18.41774	17.24809	23	ATP6V1C1	>sp|P21283|VATC1_HUMAN V-type proton ATPase subunit C 1 OS=Homo sapiens GN=ATP6V1C1 PE=1 SV=4	1.16965	17.8329147481529	-2.67352089582034	0.0158026417301912	0.178426979554953	-3.1086594620687	9	9	-	-	-
>tr|D6RCE2|D6RCE2_HUMAN Tetratricopeptide repeat protein 37 (Fragment) OS=Homo sapiens GN=TTC37 PE=1 SV=1	20.4367710576516	18.9717727021753	19.1678852701744	18.5338436648752	18.8238111868664	18.5701917848869	19.4317975814685	19.9289556982674	19.560677182424	20.5482645730217	20.5030177889964	19.9245941015533	20.1453134308462	20.2159926778021	19.1965059549576	19.8953897214746	19.4679611398633	19.8328828359985	19.26952	19.96999	27	TTC37	>tr|D6RCE2|D6RCE2_HUMAN Tetratricopeptide repeat protein 37 (Fragment) OS=Homo sapiens GN=TTC37 PE=1 SV=1	-0.700468	19.6197571307391	2.67269704196335	0.0158299769839821	0.178426979554953	-3.11019491142509	9	9	+	-	+
>tr|G3V4E7|G3V4E7_HUMAN UPF0568 protein C14orf166 OS=Homo sapiens GN=C14orf166 PE=1 SV=1	20.9635787417899	20.6135481083968	21.0102842593992	19.3748786771395	19.0370012922611	19.3394546107872	20.435476185709	20.3712904775241	20.0878584667533	19.7727132174142	21.3930724918987	21.4248879993708	22.3093148819897	23.0980190383626	23.9016813073244	20.7981684723219	20.2651962180574	20.4066134463893	20.13704	21.48552	3	C14orf166	>tr|G3V4E7|G3V4E7_HUMAN UPF0568 protein C14orf166 OS=Homo sapiens GN=C14orf166 PE=1 SV=1	-1.34848	20.8112798829383	2.66987293621634	0.0159240233200333	0.178908640243814	-3.11545695307636	9	9	+	-	+
>tr|B0QY59|B0QY59_HUMAN GTP-binding protein 1 (Fragment) OS=Homo sapiens GN=GTPBP1 PE=1 SV=1	20.4382939934119	20.1072332083289	19.0182181635424	18.8785157240358	18.925053916692	18.144711643877	17.4205668260648	19.8924035689549	19.8971962233637	19.0537124307706	17.8073261401432	19.1190412085596	17.8672154646002	16.9288506061349	17.0740822578915	17.5112111581229	17.7408824440328	19.2413348322264	19.19135	18.03818	15	GTPBP1	>tr|B0QY59|B0QY59_HUMAN GTP-binding protein 1 (Fragment) OS=Homo sapiens GN=GTPBP1 PE=1 SV=1	1.15317	18.6147694339308	-2.66920438277399	0.0159463650114392	0.178908640243814	-3.11670233349149	9	9	-	+	-
>sp|Q9Y295|DRG1_HUMAN Developmentally-regulated GTP-binding protein 1 OS=Homo sapiens GN=DRG1 PE=1 SV=1	20.517046438448	20.8344419666237	20.8799857476897	20.3593365624632	21.2626410170007	20.5530783055967	20.9017751484424	20.8565756514922	20.6765792176911	21.2447592923064	21.4628783436202	20.8389479445837	21.1246842146786	21.1099955468472	21.2940060209612	21.0923038747408	20.9312813226225	20.982125671181	20.76016	21.12011	21	DRG1	>sp|Q9Y295|DRG1_HUMAN Developmentally-regulated GTP-binding protein 1 OS=Homo sapiens GN=DRG1 PE=1 SV=1	-0.359947	20.9401356826105	2.66453705280367	0.0161031738173428	0.179322032324772	-3.12539333321056	9	9	+	+	-
>sp|P62875|RPAB5_HUMAN DNA-directed RNA polymerases I, II, and III subunit RPABC5 OS=Homo sapiens GN=POLR2L PE=1 SV=1	19.8274620734393	20.3754024675686	20.6464251683619	20.3314195297782	20.4115817360977	20.5707464420038	19.2031184328614	19.8181276145185	19.283913877791	17.5308489129409	19.8613798192997	20.5153793068327	12.7215862908649	16.943114720053	16.6825931659558	18.8934757769837	19.5408963793096	19.0438107007383	20.05202	17.97034	3	POLR2L	>sp|P62875|RPAB5_HUMAN DNA-directed RNA polymerases I, II, and III subunit RPABC5 OS=Homo sapiens GN=POLR2L PE=1 SV=1	2.08168	19.011182356411	-2.66316677857018	0.0161494899942146	0.179322032324772	-3.1279438127782	9	9	-	-	+
>sp|Q99590|SCAFB_HUMAN Protein SCAF11 OS=Homo sapiens GN=SCAF11 PE=1 SV=2	16.0703853717417	18.9822012743914	15.4948395154861	19.522499859635	19.4764352044763	19.5723097964195	15.0963451602551	15.5484123769673	14.9096395217054	15.5939247013607	15.6107712355989	17.537173887984	11.681569265649	15.307147962274	12.6955218954773	14.8694013737898	15.4008890772325	14.9974890382221	17.1859	14.85488	64	SCAF11	>sp|Q99590|SCAFB_HUMAN Protein SCAF11 OS=Homo sapiens GN=SCAF11 PE=1 SV=2	2.33102	16.0203864732592	-2.66230961612421	0.0161785272949408	0.179322032324772	-3.12953898784094	9	9	-	-	+
>tr|E9PH38|E9PH38_HUMAN Serine/threonine-protein phosphatase 2A 65 kDa regulatory subunit A alpha isoform (Fragment) OS=Homo sapiens GN=PPP2R1A PE=1 SV=2	20.0033015107814	20.3693651046702	19.9320771334239	20.9800107164491	20.3484653181887	20.9056413041326	20.0431497400534	20.0925170596234	20.335858354753	18.8506780132489	19.8342007780807	20.3840119799991	18.2278861950953	20.7311520676067	19.628606681885	20.0423106065075	19.3374908187695	18.880034011595	20.33449	19.54626	9	PPP2R1A	>tr|E9PH38|E9PH38_HUMAN Serine/threonine-protein phosphatase 2A 65 kDa regulatory subunit A alpha isoform (Fragment) OS=Homo sapiens GN=PPP2R1A PE=1 SV=2	0.788224	19.9403754108258	-2.66219165766358	0.0161825271647614	0.179322032324772	-3.12975849263723	9	9	-	+	+
>sp|P33316|DUT_HUMAN Deoxyuridine 5'-triphosphate nucleotidohydrolase, mitochondrial OS=Homo sapiens GN=DUT PE=1 SV=4	15.6676509642002	12.7292658990669	14.6690907502566	16.9336465838158	15.851555068358	15.1755052021849	14.0645562189547	13.5307874829395	12.6955218954773	16.2780205569852	14.6690907502566	15.2486263917508	16.097141925834	16.2307332220918	15.5509213474087	16.8059278966824	16.4905628107994	16.4528139929434	14.59084	15.98043	14	DUT	>sp|P33316|DUT_HUMAN Deoxyuridine 5'-triphosphate nucleotidohydrolase, mitochondrial OS=Homo sapiens GN=DUT PE=1 SV=4	-1.38958	15.285634386667	2.66104493783111	0.016221460682091	0.179322032324772	-3.13189219044932	9	9	-	-	+
>sp|O95837|GNA14_HUMAN Guanine nucleotide-binding protein subunit alpha-14 OS=Homo sapiens GN=GNA14 PE=1 SV=1	19.3077454738705	17.5318671881509	18.5487105657896	18.4837505078689	18.5126393024126	18.8432725549029	17.1043442297041	17.6276325991982	16.6971190592101	17.0425233378471	17.0756911367987	16.8023206049601	15.4096422512604	18.5616624394008	17.5648385620309	15.7736147456448	17.9529285462944	15.6828672479518	18.07301	16.87401	17	GNA14	>sp|O95837|GNA14_HUMAN Guanine nucleotide-binding protein subunit alpha-14 OS=Homo sapiens GN=GNA14 PE=1 SV=1	1.199	17.4735094640721	-2.65985384859438	0.0162619953104192	0.179322032324772	-3.13410807489902	9	9	-	-	-
>tr|A0A0A6YYB9|A0A0A6YYB9_HUMAN Golgi apparatus membrane protein TVP23 homolog OS=Homo sapiens GN=TVP23C-CDRT4 PE=1 SV=1	14.8891558549379	16.4812159109818	15.8751721720332	16.5671076624834	16.9020441055854	16.3090744935714	12.6955218954773	12.6955218954773	12.6955218954773	14.6841390643596	14.4079500863056	14.2023864467901	12.7215862908649	12.6955218954773	12.6955218954773	12.6955218954773	12.6955218954773	12.6955218954773	15.01226	13.27707	9	TVP23C-CDRT4	>tr|A0A0A6YYB9|A0A0A6YYB9_HUMAN Golgi apparatus membrane protein TVP23 homolog OS=Homo sapiens GN=TVP23C-CDRT4 PE=1 SV=1	1.73518	14.1446670695406	-2.65956563161258	0.0162718183049551	0.179322032324772	-3.1346442125061	9	9	-	-	-
>tr|K7EKS7|K7EKS7_HUMAN 60S ribosomal protein L22 OS=Homo sapiens GN=RPL22 PE=1 SV=1	23.9405984076593	24.2790261476723	24.598896471668	23.5133555483982	23.3886551064432	23.8262906835394	24.4793932292682	24.6650282248012	24.5517003533506	24.8332119591553	25.2270979691512	24.8374186257761	23.9617830237886	24.6365740419777	25.1091836112129	24.8113195927977	24.4761436360205	24.473170144529	24.1381	24.70732	3	RPL22	>tr|K7EKS7|K7EKS7_HUMAN 60S ribosomal protein L22 OS=Homo sapiens GN=RPL22 PE=1 SV=1	-0.569218	24.422713709845	2.65936929677367	0.0162785130208367	0.179322032324772	-3.13500941939757	9	9	+	-	+
>sp|Q8NHP1|ARK74_HUMAN Aflatoxin B1 aldehyde reductase member 4 OS=Homo sapiens GN=AKR7L PE=2 SV=6	16.6508101862053	16.957885392032	17.0520039519606	16.3891475856246	16.2677328781191	18.4220179624476	15.8543340269692	16.9671560158738	17.2625790451542	16.0247757382879	15.5466837877938	16.4275790724832	16.3107370953975	17.8149905218083	15.406180603927	15.1265889209842	13.2758539446384	13.5801207582595	16.8693	15.5015	15	AKR7L	>sp|Q8NHP1|ARK74_HUMAN Aflatoxin B1 aldehyde reductase member 4 OS=Homo sapiens GN=AKR7L PE=2 SV=6	1.3678	16.1853987493315	-2.65630773390568	0.0163832483778319	0.179917391780154	-3.14070296785797	9	9	-	-	-
>tr|K7EJQ6|K7EJQ6_HUMAN Protein YIF1B (Fragment) OS=Homo sapiens GN=YIF1B PE=1 SV=1	12.6955218954773	12.6955218954773	14.427402574179	17.262967811105	16.7134232141589	12.6955218954773	15.2915584730231	12.6955218954773	15.4132256391937	12.6955218954773	12.6955218954773	13.8384963058768	12.7215862908649	12.6955218954773	12.6955218954773	12.6955218954773	12.6955218954773	12.6955218954773	14.4323	12.82542	4	YIF1B	>tr|K7EJQ6|K7EJQ6_HUMAN Protein YIF1B (Fragment) OS=Homo sapiens GN=YIF1B PE=1 SV=1	1.60688	13.6288556199251	-2.65562683102755	0.0164066291804464	0.179917391780154	-3.14196889269205	9	9	-	-	-
>tr|A0A087WTD7|A0A087WTD7_HUMAN A-kinase anchor protein 13 OS=Homo sapiens GN=AKAP13 PE=1 SV=1	18.6773708197075	18.1699930307558	18.2074292409668	18.8161850896308	17.7753443152724	17.9536411805053	19.3132103958401	19.2626673132603	18.9659917457807	19.7440389973709	19.8023928379532	18.943267803521	18.7673851750821	18.9816137876903	19.2701503725026	18.829566869012	18.8254381360628	20.01256884843	18.57131	19.24182	58	AKAP13	>tr|A0A087WTD7|A0A087WTD7_HUMAN A-kinase anchor protein 13 OS=Homo sapiens GN=AKAP13 PE=1 SV=1	-0.67051	18.9065697755191	2.65173038326656	0.0165410388681788	0.180842660343491	-3.14921071636941	9	9	+	+	+
>sp|A6NHL2|TBAL3_HUMAN Tubulin alpha chain-like 3 OS=Homo sapiens GN=TUBAL3 PE=1 SV=2	18.0815505357668	18.6753807959117	18.5231885618378	19.4290149914331	19.5029934499995	19.6067666806526	18.3894887154672	18.3242599670555	18.4445209413608	18.5043726186602	18.9189649057745	18.7265218689878	15.2480019104704	16.3697297373208	19.8482003014069	15.5246889692944	14.3423810902055	15.5027693302968	18.77524	16.9984	24	TUBAL3	>sp|A6NHL2|TBAL3_HUMAN Tubulin alpha chain-like 3 OS=Homo sapiens GN=TUBAL3 PE=1 SV=2	1.77684	17.8868219651057	-2.65102579928236	0.0165654557128146	0.180842660343491	-3.15051979917696	9	9	+	-	-
>tr|H7C456|H7C456_HUMAN Microtubule-associated protein 4 (Fragment) OS=Homo sapiens GN=MAP4 PE=1 SV=2	22.2393855145782	21.9212682406962	22.6243732318483	21.1936561042186	21.1312617438822	21.2144021856436	21.5485756419989	21.6465066252727	21.6099282557364	23.1188358301919	22.9914876068751	22.8479844836537	21.1858278815219	22.0288903017305	22.0985708272883	22.3381690533026	22.5049716474913	22.2603823819335	21.68104	22.37501	10	MAP4	>tr|H7C456|H7C456_HUMAN Microtubule-associated protein 4 (Fragment) OS=Homo sapiens GN=MAP4 PE=1 SV=2	-0.693974	22.0280265309924	2.64384249143361	0.0168163581489603	0.183170107371411	-3.16385837615919	9	9	+	-	-
>sp|Q9HC36|MRM3_HUMAN rRNA methyltransferase 3, mitochondrial OS=Homo sapiens GN=RNMTL1 PE=1 SV=2	15.9523316558464	14.8694013737898	14.5040497433846	12.6955218954773	12.6955218954773	12.6955218954773	14.0076204907849	15.1289776546105	14.9954865954155	16.3865950731763	17.0865321732278	16.9507055104069	14.8712464410896	12.6955218954773	15.2923124050201	15.6168082863944	16.7222482361335	15.9836903179413	14.1716	15.73396	19	RNMTL1	>sp|Q9HC36|MRM3_HUMAN rRNA methyltransferase 3, mitochondrial OS=Homo sapiens GN=RNMTL1 PE=1 SV=2	-1.56236	14.9527829743962	2.64020182307987	0.0169449012527584	0.183947566121538	-3.17061332872863	9	9	-	-	-
>tr|E9PCX2|E9PCX2_HUMAN Aldose reductase OS=Homo sapiens GN=AKR1B1 PE=1 SV=1	19.7256164561628	19.8946632700675	20.0343353052857	19.7384457221784	19.8202625070633	20.0538256321293	19.9386625130943	19.9459057053963	19.8181276145185	19.5250970642443	19.6275342866911	19.4222174558982	19.6432030967164	19.543033054047	19.8421647481882	18.947410347089	18.5002511620892	19.8878075504073	19.88554	19.43764	14	AKR1B1	>tr|E9PCX2|E9PCX2_HUMAN Aldose reductase OS=Homo sapiens GN=AKR1B1 PE=1 SV=1	0.447903	19.6615868606259	-2.63967824732027	0.01696346431092	0.183947566121538	-3.17158448206742	9	9	+	-	+
>sp|P15291|B4GT1_HUMAN Beta-1,4-galactosyltransferase 1 OS=Homo sapiens GN=B4GALT1 PE=1 SV=5	18.3907697109506	18.1672841506995	17.5557086856701	17.1322108599312	18.3869841680357	18.2676005140314	16.8439061706826	17.2764866064836	16.8672371214596	16.5699648164307	16.7362797434349	17.7713573848838	12.7215862908649	15.2896424068022	12.6955218954773	17.679723891822	17.0282436154654	16.6707782133032	17.65424	15.90701	16	B4GALT1	>sp|P15291|B4GT1_HUMAN Beta-1,4-galactosyltransferase 1 OS=Homo sapiens GN=B4GALT1 PE=1 SV=5	1.74723	16.7806270136905	-2.63713027020461	0.0170540783673043	0.183983561470958	-3.17630952214783	9	9	-	+	-
>tr|E7EQE4|E7EQE4_HUMAN Calcium/calmodulin-dependent protein kinase type II subunit beta (Fragment) OS=Homo sapiens GN=CAMK2B PE=1 SV=1	19.3972390964261	18.6371470173941	19.497015097429	17.8372356982518	17.8574599888776	18.3366076578154	18.3977524205923	19.1969129013147	19.3272177019178	22.3537001606847	18.3763060448857	19.1728855317839	20.3039531841335	19.5250970642443	19.8106181329661	19.5270220011425	19.5000571394748	19.7395162714319	18.72051	19.81213	6	CAMK2B	>tr|E7EQE4|E7EQE4_HUMAN Calcium/calmodulin-dependent protein kinase type II subunit beta (Fragment) OS=Homo sapiens GN=CAMK2B PE=1 SV=1	-1.09162	19.2663190617092	2.63637425767357	0.0170810531867114	0.183983561470958	-3.17771115107711	9	9	-	-	-
>tr|X6R9F1|X6R9F1_HUMAN Arginine and glutamate-rich protein 1 OS=Homo sapiens GN=ARGLU1 PE=1 SV=1	21.6876464024859	24.6812928741469	21.1594879780447	24.8713734121272	25.0546872737048	24.9655360374265	20.9876894040368	22.6906038165588	22.9532438475283	20.5334416266211	21.2727786847289	24.1672278680276	18.8991124547927	24.8007661690355	18.0442370559971	18.4900561311567	20.3258074393726	20.3640851824311	23.22795	20.76639	1	ARGLU1	>tr|X6R9F1|X6R9F1_HUMAN Arginine and glutamate-rich protein 1 OS=Homo sapiens GN=ARGLU1 PE=1 SV=1	2.46156	21.9971707587902	-2.63603564129202	0.0170931483331962	0.183983561470958	-3.1783388868524	9	9	-	-	+
>tr|B1ALG1|B1ALG1_HUMAN Probable global transcription activator SNF2L2 OS=Homo sapiens GN=SMARCA2 PE=1 SV=1	12.6955218954773	12.6955218954773	12.6955218954773	12.6955218954773	12.6955218954773	12.6955218954773	15.7274461834679	14.0317673571774	12.6955218954773	15.8905604496149	16.0956195582194	15.732472731879	12.7215862908649	12.6955218954773	12.6955218954773	15.1841349261083	16.2919347718706	16.0725168396012	13.18087	14.81999	8	SMARCA2	>tr|B1ALG1|B1ALG1_HUMAN Probable global transcription activator SNF2L2 OS=Homo sapiens GN=SMARCA2 PE=1 SV=1	-1.63911	14.0004297871166	2.63533298166859	0.017118272907549	0.183983561470958	-3.17964139503304	9	9	-	-	+
>tr|F8VWQ0|F8VWQ0_HUMAN Phosphate carrier protein, mitochondrial OS=Homo sapiens GN=SLC25A3 PE=1 SV=1	14.7245495854203	12.6955218954773	12.9480874030665	16.2856594928163	16.0074834112265	16.2617812636007	12.6955218954773	12.6955218954773	12.6955218954773	12.6955218954773	12.6955218954773	12.6955218954773	12.7215862908649	12.6955218954773	12.6955218954773	12.6955218954773	12.6955218954773	12.4957814020539	14.11218	12.67622	9	SLC25A3	>tr|F8VWQ0|F8VWQ0_HUMAN Phosphate carrier protein, mitochondrial OS=Homo sapiens GN=SLC25A3 PE=1 SV=1	1.43596	13.3942038721833	-2.63416264124278	0.0171601982153503	0.18402702633592	-3.18181053429677	9	9	-	+	-
>sp|P15924|DESP_HUMAN Desmoplakin OS=Homo sapiens GN=DSP PE=1 SV=3	17.6296587373228	17.0570906004586	17.0878407757122	18.2339408959983	18.9523974693518	17.7988632900182	17.912589765364	17.9114916191691	17.5342186528858	18.7791964414549	19.0572718285057	17.8274732325553	18.0793857105176	18.2251365214797	17.875399217422	19.0229911611568	19.0304815355507	18.3788634383381	17.7909	18.47513	146	DSP	>sp|P15924|DESP_HUMAN Desmoplakin OS=Homo sapiens GN=DSP PE=1 SV=3	-0.684234	18.1330161607368	2.62938044670142	0.0173325306482485	0.184753243157405	-3.1906700610381	9	9	-	-	+
>tr|F8W9B8|F8W9B8_HUMAN Exocyst complex component 5 OS=Homo sapiens GN=EXOC5 PE=1 SV=1	15.1922959620728	14.7762305855771	15.3334116795088	15.9686727383053	15.3080624225802	15.8825805334256	17.8202197450024	17.6188456055506	14.3622581291601	17.5714989045206	18.4215089048051	16.014696889353	15.7120812504049	16.3209518215057	16.0665218586014	18.394438955285	18.0194267767707	18.7867221692952	15.80695	17.25643	31	EXOC5	>tr|F8W9B8|F8W9B8_HUMAN Exocyst complex component 5 OS=Homo sapiens GN=EXOC5 PE=1 SV=1	-1.44947	16.5316902739847	2.62920358522219	0.0173389355906683	0.184753243157405	-3.19099759489837	9	9	+	-	-
>tr|F8VS54|F8VS54_HUMAN Rac GTPase-activating protein 1 (Fragment) OS=Homo sapiens GN=RACGAP1 PE=1 SV=1	12.6955218954773	12.6955218954773	12.6955218954773	12.6955218954773	12.6955218954773	12.6955218954773	13.5898522989727	13.6595450794107	12.6955218954773	12.6955218954773	15.4567503730509	14.6484989701823	12.7215862908649	12.6955218954773	12.6955218954773	17.5648385620309	17.6154855265377	17.2829712757926	12.90201	14.81963	6	RACGAP1	>tr|F8VS54|F8VS54_HUMAN Rac GTPase-activating protein 1 (Fragment) OS=Homo sapiens GN=RACGAP1 PE=1 SV=1	-1.91763	13.8608192962009	2.62911874518945	0.0173420088266317	0.184753243157405	-3.1911547090482	9	9	-	-	+
>tr|Q8WYH2|Q8WYH2_HUMAN EF-hand domain-containing protein D1 OS=Homo sapiens GN=PP1187 PE=1 SV=1	16.0915847117771	17.0696866872759	17.0873262075881	17.897797794756	18.5257373097256	17.7929089496687	16.3858189346996	16.4535090923237	16.5472361919749	16.6430271825954	14.2023864467901	16.5174524286082	12.7215862908649	17.9262357060216	12.6955218954773	14.8765239283222	16.1612545864438	16.6523721613362	17.09462	15.37737	6	PP1187	>tr|Q8WYH2|Q8WYH2_HUMAN EF-hand domain-containing protein D1 OS=Homo sapiens GN=PP1187 PE=1 SV=1	1.71725	16.2359981392361	-2.62768688210863	0.0173939548321242	0.184901165370808	-3.19380605740584	9	9	-	-	-
>tr|H3BSD1|H3BSD1_HUMAN Methenyltetrahydrofolate synthase domain-containing protein (Fragment) OS=Homo sapiens GN=MTHFSD PE=1 SV=2	15.4784171839544	15.8363178593708	15.1755052021849	16.6373064227976	16.5346817854563	16.9169753113118	15.0299727440314	16.0155067443618	16.2488030166368	16.5872440793563	17.6741291091517	17.0975806949616	20.5967354744404	18.4525406943569	23.0905616439625	16.645193824996	16.4241109087448	15.9052951467769	15.98594	18.0526	11	MTHFSD	>tr|H3BSD1|H3BSD1_HUMAN Methenyltetrahydrofolate synthase domain-containing protein (Fragment) OS=Homo sapiens GN=MTHFSD PE=1 SV=2	-2.06666	17.0192709914918	2.6263971853241	0.0174408700989256	0.184995080656289	-3.19619367396744	9	9	-	-	-
>tr|A8MW50|A8MW50_HUMAN L-lactate dehydrogenase (Fragment) OS=Homo sapiens GN=LDHB PE=1 SV=1	22.770994851561	22.5933296517675	22.447731931399	22.6229947230989	22.7512735083187	22.737173323415	22.4911208939161	21.4744206470925	22.1167868582988	22.3977370581699	22.4875585449275	21.6485017522987	21.2144021856436	21.6189638383222	21.7655160776037	20.9216656420987	22.1670161206027	22.2587626176147	22.44509	21.83112	10	LDHB	>tr|A8MW50|A8MW50_HUMAN L-lactate dehydrogenase (Fragment) OS=Homo sapiens GN=LDHB PE=1 SV=1	0.613967	22.1381083458972	-2.62442169725582	0.0175129661714044	0.185355097299962	-3.19985000232216	9	9	+	+	-
>tr|F5H1C3|F5H1C3_HUMAN Gamma-enolase (Fragment) OS=Homo sapiens GN=ENO2 PE=1 SV=1	20.1815872266756	20.0216892101567	19.5797018857148	21.65566323458	21.4458342913669	21.4046624391502	17.8192228699247	17.8119265069086	17.7170948346955	19.1303724627065	15.7496933467196	21.0086918794746	16.7348087511519	15.9038410977132	18.0395476759638	17.7713573848838	17.6333677671316	18.1911414634172	19.73749	17.79587	4	ENO2	>tr|F5H1C3|F5H1C3_HUMAN Gamma-enolase (Fragment) OS=Homo sapiens GN=ENO2 PE=1 SV=1	1.94162	18.7666780182408	-2.62301935359197	0.0175643173317422	0.185494464342617	-3.20244486973654	9	9	-	-	-
>tr|G3V4S5|G3V4S5_HUMAN Proteasome subunit alpha type-6 OS=Homo sapiens GN=PSMA6 PE=1 SV=1	20.0160460298584	17.20030712686	18.6409739695201	20.6176674593292	20.1518427722855	20.2899671837212	21.414888935964	20.4590823892148	21.3125133035366	21.0204997428522	21.669388439992	21.0428408456607	21.6198898399084	20.8362169008587	20.9617448387077	21.3208481903458	20.989800741209	21.086479161726	20.01148	21.17197	3	PSMA6	>tr|G3V4S5|G3V4S5_HUMAN Proteasome subunit alpha type-6 OS=Homo sapiens GN=PSMA6 PE=1 SV=1	-1.16049	20.591722103975	2.62014014620694	0.0176701982245216	0.186207858947345	-3.20777077938673	9	9	+	-	+
>tr|C9J9B2|C9J9B2_HUMAN RNA-binding motif, single-stranded-interacting protein 3 OS=Homo sapiens GN=RBMS3 PE=1 SV=1	16.718995351152	17.6910249230562	17.2873960925147	17.5537101241488	18.0310344259839	17.7137073560039	18.4757684917196	13.9851934335575	18.1705436515731	12.6955218954773	12.6955218954773	18.0442370559971	12.7215862908649	12.6955218954773	12.6955218954773	18.4220179624476	14.3280714970918	18.448111122935	17.29193	14.74957	10	RBMS3	>tr|C9J9B2|C9J9B2_HUMAN RNA-binding motif, single-stranded-interacting protein 3 OS=Homo sapiens GN=RBMS3 PE=1 SV=1	2.54236	16.0207491867197	-2.6141735072359	0.0178915551112059	0.187971378587319	-3.2188003959102	9	9	+	-	-
>sp|P50148|GNAQ_HUMAN Guanine nucleotide-binding protein G(q) subunit alpha OS=Homo sapiens GN=GNAQ PE=1 SV=4	19.7014624039718	18.2996449629969	18.967574407622	19.1555353967651	19.3744135819011	19.6781626026115	18.6895243466497	19.0921000756305	18.6971758562971	18.3539805467155	18.7460304086501	17.6291492727966	18.3373564278795	19.1593616128465	18.3544928488891	18.0199732048431	18.9998293008803	18.6531882776771	19.07284	18.4726	18	GNAQ	>sp|P50148|GNAQ_HUMAN Guanine nucleotide-binding protein G(q) subunit alpha OS=Homo sapiens GN=GNAQ PE=1 SV=4	0.600248	18.7727197519791	-2.61263926981102	0.0179488991115938	0.187971378587319	-3.22163489338482	9	9	+	+	-
>tr|H0YD26|H0YD26_HUMAN ATP-dependent RNA helicase DDX25 (Fragment) OS=Homo sapiens GN=DDX25 PE=1 SV=2	16.5248712846445	15.6755620228222	14.0419689229034	15.6417161635846	15.8249757964823	15.5792989822164	14.7561421891155	13.3685331581222	14.2530946313948	16.277149143008	16.4181045791187	16.42939527899	17.2022378166049	20.7888682289774	20.0668211372975	15.5052389359188	14.9984367236353	15.3610178081424	15.07402	17.00525	10	DDX25	>tr|H0YD26|H0YD26_HUMAN ATP-dependent RNA helicase DDX25 (Fragment) OS=Homo sapiens GN=DDX25 PE=1 SV=2	-1.93123	16.0396351557211	2.61251298517228	0.0179536269379407	0.187971378587319	-3.2218681742647	9	9	+	-	+
>tr|H7C3C4|H7C3C4_HUMAN Anion exchange protein (Fragment) OS=Homo sapiens GN=SLC4A7 PE=1 SV=1	18.0788962123521	16.4015395591509	16.9310373299532	16.8234438954474	16.7697377725344	16.7964228472032	16.9789293793322	16.9602875537943	16.472800818257	17.4334643990715	17.1252272923614	14.5117295603626	15.3230569797374	16.1901876956405	14.1800965107157	15.5000547958752	16.4176125659612	16.2850343409128	16.91257	15.88516	38	SLC4A7	>tr|H7C3C4|H7C3C4_HUMAN Anion exchange protein (Fragment) OS=Homo sapiens GN=SLC4A7 PE=1 SV=1	1.0274	16.3988644171479	-2.60911530840077	0.0180812744617156	0.188900712548418	-3.22814288876222	9	9	-	-	-
>sp|Q9BZJ0|CRNL1_HUMAN Crooked neck-like protein 1 OS=Homo sapiens GN=CRNKL1 PE=1 SV=4	17.7475752755621	18.1746874909362	18.8430767242566	17.9287445811864	18.4199429275307	17.9275935182412	18.795034669473	18.4340822901403	18.7359859125378	18.5012933721071	18.8060906309831	18.0978959626906	19.5859002526337	19.6109433725434	19.889608364551	18.9074766335062	18.6128230123471	18.7547065109827	18.33408	18.97408	43	CRNKL1	>sp|Q9BZJ0|CRNL1_HUMAN Crooked neck-like protein 1 OS=Homo sapiens GN=CRNKL1 PE=1 SV=4	-0.640002	18.6540811945672	2.6050244995117	0.0182361081312041	0.189816891654224	-3.23569332950979	9	9	+	-	+
>tr|H0YBR6|H0YBR6_HUMAN Protein FAM91A1 (Fragment) OS=Homo sapiens GN=FAM91A1 PE=1 SV=1	18.4693411957405	19.9452157785198	18.1122441871256	19.4323432914465	19.473106890975	19.1780605218949	20.3746083426475	20.3890797662375	20.6068933869194	19.3354326514684	18.7014260654172	20.6661616541725	12.7215862908649	18.4337725603937	15.0663302771042	16.0956195582194	17.8922556845548	17.7569427055283	19.55343	17.40773	5	FAM91A1	>tr|H0YBR6|H0YBR6_HUMAN Protein FAM91A1 (Fragment) OS=Homo sapiens GN=FAM91A1 PE=1 SV=1	2.14571	18.4805789338461	-2.60473492979849	0.0182471157683249	0.189816891654224	-3.23622761113952	9	9	-	-	-
>sp|Q99470|SDF2_HUMAN Stromal cell-derived factor 2 OS=Homo sapiens GN=SDF2 PE=1 SV=2	18.2854738106064	19.1735595315601	19.1279142194921	18.8839022952741	18.2773097885781	19.5080702327856	17.9120021768672	17.6160157615127	17.663450492901	17.6678038456768	17.6006504201362	18.7020266124818	17.1737332391057	15.5755315097342	17.3859686234026	18.0194267767707	16.8701229312938	18.4996585260804	18.49419	17.49944	8	SDF2	>sp|Q99470|SDF2_HUMAN Stromal cell-derived factor 2 OS=Homo sapiens GN=SDF2 PE=1 SV=2	0.994753	17.9968122663478	-2.60078273687171	0.0183979867133588	0.190641059135474	-3.24351737374894	9	9	-	+	-
>tr|H3BUC9|H3BUC9_HUMAN Nodal modulator 1 (Fragment) OS=Homo sapiens GN=NOMO1 PE=1 SV=1	20.149257443699	19.797805217481	19.7370606513894	19.0970715094322	18.6612706227142	18.7074944449456	18.4746511995323	18.706616168473	18.6787124213824	21.0596459988782	19.5596958927007	20.2029145495799	20.4018782612873	19.0755593825772	19.1894856800808	19.9497440971721	19.6932910643011	19.7119199918727	19.11222	19.87157	7	NOMO1	>tr|H3BUC9|H3BUC9_HUMAN Nodal modulator 1 (Fragment) OS=Homo sapiens GN=NOMO1 PE=1 SV=1	-0.759355	19.4918930331944	2.6001263620173	0.0184231577461692	0.190641059135474	-3.24472761718792	9	9	-	+	-
>tr|I3L3Z8|I3L3Z8_HUMAN Pre-mRNA-processing-splicing factor 8 (Fragment) OS=Homo sapiens GN=PRPF8 PE=1 SV=1	20.7888682289774	20.8016514149118	20.398041916123	19.0749744872857	19.7391151615379	19.9884614897502	20.6961231499771	20.0403498443753	20.6551251140674	20.8777801880813	21.1636531460132	21.1241424198058	20.4811671045261	20.4072744235756	21.0937423365867	20.5967354744404	20.8724194351704	20.7960360135166	20.24252	20.82366	13	PRPF8	>tr|I3L3Z8|I3L3Z8_HUMAN Pre-mRNA-processing-splicing factor 8 (Fragment) OS=Homo sapiens GN=PRPF8 PE=1 SV=1	-0.581138	20.5330922971512	2.59815786067705	0.0184988434614154	0.190641059135474	-3.24835646134191	9	9	-	+	+
>tr|M0R0Q9|M0R0Q9_HUMAN Complement C3 (Fragment) OS=Homo sapiens GN=C3 PE=1 SV=1	12.6955218954773	12.6955218954773	16.4905628107994	12.6955218954773	12.6955218954773	12.6955218954773	15.8819028520603	16.5665449628046	16.3075085742217	12.6955218954773	12.6955218954773	12.6955218954773	12.7215862908649	12.6955218954773	12.6955218954773	12.6955218954773	12.6955218954773	12.6955218954773	14.30268	12.69842	5	C3	>tr|M0R0Q9|M0R0Q9_HUMAN Complement C3 (Fragment) OS=Homo sapiens GN=C3 PE=1 SV=1	1.60426	13.5005494517753	-2.59741904131836	0.0185273261071992	0.190641059135474	-3.24971815611594	9	9	-	-	-
>sp|Q9BZF1|OSBL8_HUMAN Oxysterol-binding protein-related protein 8 OS=Homo sapiens GN=OSBPL8 PE=1 SV=3	19.4004691516486	18.887494831373	19.0766520367569	18.123588668953	18.3973099194603	17.8305370528761	18.2054015561754	18.713535896978	18.6924144777264	16.4868899210255	18.4762199201414	17.8644148533679	17.938814376744	17.0565898515565	17.4408965908227	18.6838275916937	18.4086896124298	18.1462007929175	18.59193	17.83362	45	OSBPL8	>sp|Q9BZF1|OSBL8_HUMAN Oxysterol-binding protein-related protein 8 OS=Homo sapiens GN=OSBPL8 PE=1 SV=3	0.758318	18.2127748390359	-2.59446122738627	0.018641772593328	0.190641059135474	-3.25516804546222	9	9	-	+	-
>tr|M0QZ34|M0QZ34_HUMAN Glioma tumor suppressor candidate region gene 2 protein (Fragment) OS=Homo sapiens GN=GLTSCR2 PE=1 SV=1	21.0963655691219	21.0662825012825	21.2348965595004	23.556151826175	23.7720399640888	23.3942991320625	21.3659895485083	20.9388383296317	20.1405365710929	19.6605244172418	19.1704244766678	20.9321716342875	21.0915444586645	19.1382740453691	20.5266105386325	17.5821082256685	21.5418700239257	22.1385373470613	21.8406	20.19801	8	GLTSCR2	>tr|M0QZ34|M0QZ34_HUMAN Glioma tumor suppressor candidate region gene 2 protein (Fragment) OS=Homo sapiens GN=GLTSCR2 PE=1 SV=1	1.64259	21.019303620499	-2.59420132671005	0.0186518609680569	0.190641059135474	-3.25564680290977	9	9	-	-	-
>tr|B7Z4L4|B7Z4L4_HUMAN Dolichyl-diphosphooligosaccharide--protein glycosyltransferase subunit 1 OS=Homo sapiens GN=RPN1 PE=1 SV=1	22.8479844836537	22.3991167841723	22.3112544876596	23.0183241095643	22.9014073925773	22.9108412677699	21.3101311461763	21.8738231009949	21.4761493617202	22.041988103927	21.6393512068327	22.0943744392012	22.3397147724555	21.458707454252	21.513751874901	21.2183645106776	21.305561244308	21.4386561895953	22.33878	21.67227	23	RPN1	>tr|B7Z4L4|B7Z4L4_HUMAN Dolichyl-diphosphooligosaccharide--protein glycosyltransferase subunit 1 OS=Homo sapiens GN=RPN1 PE=1 SV=1	0.666507	22.0055278850244	-2.59368664659989	0.0186718542457189	0.190641059135474	-3.25659482686809	9	9	-	+	-
>tr|H7C1J2|H7C1J2_HUMAN Deoxynucleotidyltransferase terminal-interacting protein 1 (Fragment) OS=Homo sapiens GN=DNTTIP1 PE=1 SV=1	16.2476083979749	15.9325746798313	16.4535090923237	18.526981117334	16.0161402169744	16.1121753855516	16.2696117570167	16.359994275946	16.3289062650489	15.8792042004135	16.797714431448	17.2954981857161	19.6107275940295	19.2778200582307	19.0921000756305	16.6430271825954	17.509650042476	17.6465825407422	16.47194	17.75026	13	DNTTIP1	>tr|H7C1J2|H7C1J2_HUMAN Deoxynucleotidyltransferase terminal-interacting protein 1 (Fragment) OS=Homo sapiens GN=DNTTIP1 PE=1 SV=1	-1.27831	17.1111014166269	2.59355984581163	0.0186767830792342	0.190641059135474	-3.25682837810418	9	9	-	-	+
>sp|Q9H4B6|SAV1_HUMAN Protein salvador homolog 1 OS=Homo sapiens GN=SAV1 PE=1 SV=2	16.3779619786742	17.0906502850829	19.242946129753	16.831497331982	16.6048409193227	16.9071377168726	13.7753319470389	12.6955218954773	12.6955218954773	12.8856647664639	12.8433498506979	16.3794342184002	14.9525308807461	12.6955218954773	14.6831017331656	12.6955218954773	12.6955218954773	12.6955218954773	15.80238	13.61402	18	SAV1	>sp|Q9H4B6|SAV1_HUMAN Protein salvador homolog 1 OS=Homo sapiens GN=SAV1 PE=1 SV=2	2.18836	14.7081988406147	-2.59348925809139	0.0186795274080868	0.190641059135474	-3.25695838987991	9	9	+	-	+
>tr|E5RJ94|E5RJ94_HUMAN Heterogeneous nuclear ribonucleoprotein H (Fragment) OS=Homo sapiens GN=HNRNPH1 PE=1 SV=1	21.5280917702124	21.6724442306905	21.4959978847611	22.0955347804698	22.080343990689	22.1451400246815	22.1000854969334	22.1527548060094	22.0943744392012	21.6159408809832	22.189785193632	21.8144500604659	23.3731619827033	22.4233199462415	22.6424266621675	22.8295711194414	22.74205089866	22.6640434304879	21.92942	22.47719	2	HNRNPH1	>tr|E5RJ94|E5RJ94_HUMAN Heterogeneous nuclear ribonucleoprotein H (Fragment) OS=Homo sapiens GN=HNRNPH1 PE=1 SV=1	-0.547776	22.2033065332462	2.59043223424151	0.018798747623972	0.191210692867849	-3.26258758549406	9	9	-	+	+
>tr|A8MXP8|A8MXP8_HUMAN Reticulocalbin-2 OS=Homo sapiens GN=RCN2 PE=1 SV=1	17.7878948561094	17.5642517705445	18.0865645045941	19.0495622100548	19.0557812163845	19.07228651205	15.5366092138969	15.6261366282918	15.3976366031267	14.4582434058797	16.3724199116438	18.1533788399551	17.3285346890682	12.6955218954773	16.6687735311762	15.5763810428032	12.6955218954773	14.5942525718774	17.46408	15.39367	9	RCN2	>tr|A8MXP8|A8MXP8_HUMAN Reticulocalbin-2 OS=Homo sapiens GN=RCN2 PE=1 SV=1	2.07041	16.4288750721339	-2.58941973857624	0.0188383928821616	0.191210692867849	-3.26445139917167	9	9	-	-	-
>tr|H0YBT4|H0YBT4_HUMAN Dihydropyrimidinase-related protein 3 (Fragment) OS=Homo sapiens GN=DPYSL3 PE=1 SV=1	19.9655112655629	18.5383515272862	18.8278417969473	20.0681969855729	19.2370288377626	19.980697392791	19.5344985655169	19.5471627477719	18.7386492996892	19.2206496508078	18.9670257156838	18.6590509425163	18.645405033607	18.4531688202532	18.0701555425887	19.4308348499437	18.6167020608311	18.7600763843516	19.38199	18.75812	11	DPYSL3	>tr|H0YBT4|H0YBT4_HUMAN Dihydropyrimidinase-related protein 3 (Fragment) OS=Homo sapiens GN=DPYSL3 PE=1 SV=1	0.623874	19.0700559677491	-2.58825671974322	0.0188840300630543	0.191210692867849	-3.2665919327167	9	9	+	-	-
>tr|Q5JV08|Q5JV08_HUMAN Ubiquitin-associated protein 2 (Fragment) OS=Homo sapiens GN=UBAP2 PE=1 SV=3	15.7316330970106	16.7151362251563	17.1766110480952	17.8076948582448	17.8771217286818	18.4437634819466	16.1065230777953	16.7284418063987	16.0550330728659	16.6962962409882	16.6107431709317	14.222506775459	12.7215862908649	12.6955218954773	12.6955218954773	16.7964228472032	17.0529366995421	16.6357765460352	16.96022	15.12526	7	UBAP2	>tr|Q5JV08|Q5JV08_HUMAN Ubiquitin-associated protein 2 (Fragment) OS=Homo sapiens GN=UBAP2 PE=1 SV=3	1.83496	16.042737264343	-2.58803400288988	0.0188927815102033	0.191210692867849	-3.26700179803454	9	9	-	-	-
>tr|H0YKU2|H0YKU2_HUMAN Proteasome activator complex subunit 2 (Fragment) OS=Homo sapiens GN=PSME2 PE=1 SV=1	12.6955218954773	16.54442064407	16.5213946783833	17.5950873088386	17.2107542486024	17.3952877032046	15.5925659290707	12.6955218954773	15.6676509642002	12.6955218954773	12.6955218954773	16.980625211416	12.7215862908649	12.6955218954773	12.6955218954773	15.4104113525419	14.81061224124	12.6955218954773	15.76869	13.7112	4	PSME2	>tr|H0YKU2|H0YKU2_HUMAN Proteasome activator complex subunit 2 (Fragment) OS=Homo sapiens GN=PSME2 PE=1 SV=1	2.05748	14.7399472133763	-2.58536641804699	0.0189979016422129	0.191794739696402	-3.27190983380355	9	9	-	+	-
>tr|A0A0B4J260|A0A0B4J260_HUMAN PRKC apoptosis WT1 regulator protein (Fragment) OS=Homo sapiens GN=PAWR PE=1 SV=3	17.2146453538709	12.6955218954773	15.7092390851802	19.3184980503608	19.2039055641334	19.1755574600499	12.6955218954773	16.4808658373151	12.6955218954773	18.0237015528285	18.0153797109094	18.3958160766304	20.4212518606303	19.4879082598857	19.5074204187108	17.7188759295247	17.8131702149307	18.3033067011004	16.13214	18.63187	3	PAWR	>tr|A0A0B4J260|A0A0B4J260_HUMAN PRKC apoptosis WT1 regulator protein (Fragment) OS=Homo sapiens GN=PAWR PE=1 SV=3	-2.49973	17.3820059868052	2.58260732595959	0.0191072121659551	0.191794739696402	-3.27698406319217	9	9	+	-	+
>sp|Q9UJX2|CDC23_HUMAN Cell division cycle protein 23 homolog OS=Homo sapiens GN=CDC23 PE=1 SV=3	18.6673317052524	20.2315242394863	17.8677243908938	17.5185563767145	18.1473311384019	17.9095784221132	19.9119166327516	18.2300757608535	18.5378433416401	20.7929093999263	20.6006142273634	19.7991473177865	19.2455902920642	18.6581541822427	17.8891275218732	19.6237620972356	20.2443234318427	20.1889891557898	18.55799	19.6714	31	CDC23	>sp|Q9UJX2|CDC23_HUMAN Cell division cycle protein 23 homolog OS=Homo sapiens GN=CDC23 PE=1 SV=3	-1.11342	19.114694424124	2.58151137033426	0.0191507976148849	0.191794739696402	-3.27899901510358	9	9	-	-	-
>tr|E5RIH5|E5RIH5_HUMAN TELO2-interacting protein 2 OS=Homo sapiens GN=TTI2 PE=1 SV=1	12.6955218954773	12.6955218954773	12.6955218954773	12.6955218954773	12.6955218954773	12.6955218954773	13.4999372190525	13.5054766176924	13.5033857159834	14.2155935800863	15.0354209444879	14.0947494578461	12.7215862908649	12.6955218954773	12.6955218954773	14.1636419545312	13.9149991367459	14.5434580694394	12.96466	13.78672	22	TTI2	>tr|E5RIH5|E5RIH5_HUMAN TELO2-interacting protein 2 OS=Homo sapiens GN=TTI2 PE=1 SV=1	-0.822062	13.375690230586	2.58125525596808	0.0191609967209336	0.191794739696402	-3.2794698397813	9	9	-	-	-
>tr|H7C2Q8|H7C2Q8_HUMAN EBNA1 binding protein 2, isoform CRA_d OS=Homo sapiens GN=EBNA1BP2 PE=1 SV=1	21.0930994636765	21.7301891741441	20.8679869332056	22.0736361929181	22.2880807161362	22.2237822652515	22.1017054454955	20.9562157901542	21.2763418069892	20.8362169008587	21.1550507442818	21.5112878426778	19.5011065074729	20.757041560777	20.1143860821251	21.4416266440916	21.3003733204171	21.1669432985864	21.62345	20.86489	16	EBNA1BP2	>tr|H7C2Q8|H7C2Q8_HUMAN EBNA1 binding protein 2, isoform CRA_d OS=Homo sapiens GN=EBNA1BP2 PE=1 SV=1	0.758556	21.2441705938477	-2.58018421405658	0.0192037041710919	0.191794739696402	-3.28143856959282	9	9	-	+	+
>tr|J3KMX2|J3KMX2_HUMAN SWI/SNF-related matrix-associated actin-dependent regulator of chromatin subfamily D member 2 OS=Homo sapiens GN=SMARCD2 PE=1 SV=1	15.1401306443261	15.7577213755075	15.8911363528639	17.1438191917066	17.0836599086443	16.5305058413629	18.8653861128524	19.232691581661	19.1279142194921	18.0752188262362	18.4431592145223	15.7153749306956	23.9063672919955	21.195101050621	20.4981933685474	19.1292338906579	18.7624205693896	19.5500193196328	17.197	19.47501	23	SMARCD2	>tr|J3KMX2|J3KMX2_HUMAN SWI/SNF-related matrix-associated actin-dependent regulator of chromatin subfamily D member 2 OS=Homo sapiens GN=SMARCD2 PE=1 SV=1	-2.27801	18.3360029828175	2.57978058495382	0.0192198221909863	0.191794739696402	-3.28218041154639	9	9	-	-	+
>sp|O60739|EIF1B_HUMAN Eukaryotic translation initiation factor 1b OS=Homo sapiens GN=EIF1B PE=1 SV=2	17.3156442090967	18.1467622259789	18.1746874909362	19.7623345044019	20.0257345318813	19.6103909347608	19.8157899460055	20.035303172893	20.2624593067889	19.2892606079103	21.5117058143829	20.0911053405494	21.0934209359401	21.4740785688648	21.8422213177806	19.5019601842888	19.8713223556594	19.5176520733206	19.23879	20.46586	5	EIF1B	>sp|O60739|EIF1B_HUMAN Eukaryotic translation initiation factor 1b OS=Homo sapiens GN=EIF1B PE=1 SV=2	-1.22707	19.8523240845244	2.57960468966118	0.0192268501918789	0.191794739696402	-3.28250367989443	9	9	-	-	-
>sp|Q15185|TEBP_HUMAN Prostaglandin E synthase 3 OS=Homo sapiens GN=PTGES3 PE=1 SV=1	18.9445237143544	18.6539383352287	18.5959746478512	20.5516562778535	20.1397267710537	20.5551785223194	18.2838244888117	19.0351609604185	18.3176254042976	19.0915535686774	17.8233923683467	17.2423507123434	18.7343481190964	18.7292084571283	18.5049946727525	17.4887673915786	18.1156951701414	18.7528770529201	19.23085	18.27591	9	PTGES3	>sp|Q15185|TEBP_HUMAN Prostaglandin E synthase 3 OS=Homo sapiens GN=PTGES3 PE=1 SV=1	0.954936	18.753377590843	-2.57839109204552	0.0192754067489413	0.191885094234338	-3.28473383881717	9	9	+	-	+
>sp|P32456|GBP2_HUMAN Guanylate-binding protein 2 OS=Homo sapiens GN=GBP2 PE=1 SV=3	19.9468617117848	19.3026130354027	14.4052215320973	14.7774907422332	18.0118201253617	18.0480216425469	18.9296026892596	18.76932827679	19.0893053471615	15.094254496682	15.387036009588	19.1082864721376	16.5882202923549	18.3426599914574	14.663260372423	12.503688017977	13.8977965697881	13.9331047466296	17.92003	15.50203	29	GBP2	>sp|P32456|GBP2_HUMAN Guanylate-binding protein 2 OS=Homo sapiens GN=GBP2 PE=1 SV=3	2.418	16.7110317817597	-2.57522683674273	0.019402558093541	0.192641656793849	-3.29054658710178	9	9	-	-	+
>sp|O14983|AT2A1_HUMAN Sarcoplasmic/endoplasmic reticulum calcium ATPase 1 OS=Homo sapiens GN=ATP2A1 PE=1 SV=1	18.645405033607	17.8788039806285	18.3907697109506	19.6689841718112	19.5231598972814	19.4472927659229	18.9455066461319	18.6629735470583	19.0869460234071	18.1754666001676	17.2841385477052	17.0361951295286	18.3767190735808	18.3902436177288	18.7337702460197	17.6154855265377	18.9642778603305	18.7371763293863	18.91665	18.14594	44	ATP2A1	>sp|O14983|AT2A1_HUMAN Sarcoplasmic/endoplasmic reticulum calcium ATPase 1 OS=Homo sapiens GN=ATP2A1 PE=1 SV=1	0.770708	18.5312952615436	-2.57310351609744	0.0194883268703014	0.192641656793849	-3.29444549160618	9	9	-	+	-
>tr|C9J7S3|C9J7S3_HUMAN Aspartate--tRNA ligase, cytoplasmic (Fragment) OS=Homo sapiens GN=DARS PE=1 SV=6	21.8672435068898	22.0118457588287	22.0052308015649	21.4681961795484	21.6015132692329	20.9909935645852	22.2741746285288	23.0761300886169	23.1017172464248	22.6418133079432	21.9125244158765	22.1613282066559	22.5334184734276	22.9404009389077	23.7403155629684	23.192229999724	22.9658066910223	23.2515812581371	22.04412	22.81549	10	DARS	>tr|C9J7S3|C9J7S3_HUMAN Aspartate--tRNA ligase, cytoplasmic (Fragment) OS=Homo sapiens GN=DARS PE=1 SV=6	-0.771375	22.429803549938	2.57267895951203	0.0195055193991805	0.192641656793849	-3.2952249164051	9	9	+	+	-
>sp|Q8NI36|WDR36_HUMAN WD repeat-containing protein 36 OS=Homo sapiens GN=WDR36 PE=1 SV=1	15.9240600780215	16.1943775221381	16.7957713189336	15.2852592895042	15.3811080202437	15.1081293940058	16.6153446252336	16.9733303433004	17.3032528304742	17.0056725333454	17.3424655273441	16.622555476204	17.740313647217	15.5597356188289	18.4858941401114	17.1482433472388	17.2706289845529	16.9649388414552	16.17563	17.12672	46	WDR36	>sp|Q8NI36|WDR36_HUMAN WD repeat-containing protein 36 OS=Homo sapiens GN=WDR36 PE=1 SV=1	-0.951091	16.651171196564	2.57226987161281	0.019522099137413	0.192641656793849	-3.29597589285962	9	9	-	-	-
>tr|F8WB07|F8WB07_HUMAN VIP36-like protein OS=Homo sapiens GN=LMAN2L PE=1 SV=1	18.7630130616395	18.3434475238809	18.05065662296	18.6007387978252	18.578600583783	18.7600763843516	19.6027251548124	19.0416177153045	18.5858600585532	17.2039717859474	18.3874334845949	19.152622811154	17.5720799031987	18.2734029075645	17.6910249230562	17.3464540943592	18.7272923494017	17.8211926822961	18.70297	18.0195	8	LMAN2L	>tr|F8WB07|F8WB07_HUMAN VIP36-like protein OS=Homo sapiens GN=LMAN2L PE=1 SV=1	0.683473	18.3612339358157	-2.57159011612523	0.0195496782213601	0.192641656793849	-3.29722363422694	9	9	-	+	-
>sp|Q6IPU0|CENPP_HUMAN Centromere protein P OS=Homo sapiens GN=CENPP PE=1 SV=1	19.5201999368317	19.2568055188823	19.4373060121691	19.1598290471928	18.8959693077492	19.1604728332251	20.0564345753934	19.8658318486514	19.9278117948381	19.3346059107639	19.909813840901	19.7240008759652	12.7215862908649	12.6955218954773	12.1097954064641	20.4906250334064	16.4693657396549	16.2747478452676	19.47563	16.63667	16	CENPP	>sp|Q6IPU0|CENPP_HUMAN Centromere protein P OS=Homo sapiens GN=CENPP PE=1 SV=1	2.83896	18.0561513174277	-2.56890374025039	0.0196590322672577	0.19332708249866	-3.30215334551882	9	9	-	-	-
>sp|Q9NXR1|NDE1_HUMAN Nuclear distribution protein nudE homolog 1 OS=Homo sapiens GN=NDE1 PE=1 SV=2	12.6955218954773	12.6955218954773	12.6955218954773	13.7975461101407	12.6955218954773	12.6955218954773	12.2405109694249	11.29100901206	12.3092364066301	13.1515093316439	12.6955218954773	12.6955218954773	14.5563316869394	12.6955218954773	12.6955218954773	14.2514918509578	14.9482410771037	13.939244432418	12.56843	13.51432	21	NDE1	>sp|Q9NXR1|NDE1_HUMAN Nuclear distribution protein nudE homolog 1 OS=Homo sapiens GN=NDE1 PE=1 SV=2	-0.945888	13.0413787742564	2.56753289718787	0.0197150584701565	0.193372419773488	-3.30466813117079	9	9	-	+	-
>tr|I3L4B1|I3L4B1_HUMAN Myosin light chain 4 (Fragment) OS=Homo sapiens GN=MYL4 PE=1 SV=1	12.6955218954773	14.2023864467901	14.6461107816159	16.3557998530101	16.2043694457636	16.1654264520519	12.6955218954773	12.6955218954773	12.6955218954773	12.6955218954773	12.6955218954773	14.0202086432254	12.7215862908649	12.6955218954773	12.6955218954773	12.6955218954773	12.6955218954773	12.6955218954773	14.2618	12.84561	6	MYL4	>tr|I3L4B1|I3L4B1_HUMAN Myosin light chain 4 (Fragment) OS=Homo sapiens GN=MYL4 PE=1 SV=1	1.41619	13.5537015979762	-2.56684444836898	0.0197432524099732	0.193372419773488	-3.30593086830346	9	9	-	-	-
>sp|P47989|XDH_HUMAN Xanthine dehydrogenase/oxidase OS=Homo sapiens GN=XDH PE=1 SV=4	19.0787991156392	19.0291932890621	19.1318598213853	19.7315570812396	19.905678252523	19.8535932517687	18.8187926808189	18.6757835900772	19.2096549054369	18.0918333542643	18.3138430931329	19.0572718285057	17.2119303273039	18.1351334517751	16.989405915438	19.2951223620787	19.2951223620787	19.3532732921336	19.27055	18.41588	55	XDH	>sp|P47989|XDH_HUMAN Xanthine dehydrogenase/oxidase OS=Homo sapiens GN=XDH PE=1 SV=4	0.854664	18.8432137763701	-2.56425405981766	0.0198496793146764	0.193949174394331	-3.31068084462911	9	9	-	-	-
>tr|E9PLL0|E9PLL0_HUMAN Multivesicular body subunit 12A (Fragment) OS=Homo sapiens GN=MVB12A PE=1 SV=1	12.6955218954773	12.6955218954773	12.6955218954773	12.6955218954773	12.6955218954773	12.6955218954773	12.6955218954773	12.6955218954773	15.4252334949646	16.4667746779449	16.9584883467518	12.6955218954773	12.7215862908649	12.6955218954773	12.6955218954773	16.0788636973173	16.4628443696584	16.8832507462637	12.99882	14.85093	5	MVB12A	>tr|E9PLL0|E9PLL0_HUMAN Multivesicular body subunit 12A (Fragment) OS=Homo sapiens GN=MVB12A PE=1 SV=1	-1.85211	13.924876804112	2.56259170360648	0.0199182641664161	0.193949174394331	-3.31372804824411	9	9	+	-	+
>sp|Q9H444|CHM4B_HUMAN Charged multivesicular body protein 4b OS=Homo sapiens GN=CHMP4B PE=1 SV=1	21.0731327866557	20.6359958817917	20.8894026797581	21.082870838454	20.9279347296205	21.8829133885802	20.3610921167545	20.694054194656	20.1620506560292	19.2383091102328	19.2944567822415	19.5236111922434	20.1496873870526	21.6300578168678	20.4423604852524	20.52967989447	19.8946632700675	20.1468396698903	20.85661	20.09441	12	CHMP4B	>sp|Q9H444|CHM4B_HUMAN Charged multivesicular body protein 4b OS=Homo sapiens GN=CHMP4B PE=1 SV=1	0.762198	20.4755062711455	-2.56250349189496	0.0199219098441275	0.193949174394331	-3.31388972296898	9	9	+	-	+
>tr|D6RCS6|D6RCS6_HUMAN Threonine--tRNA ligase, cytoplasmic OS=Homo sapiens GN=TARS PE=1 SV=1	21.0822581911228	21.187623388026	21.129796003713	19.548508843738	19.4004691516486	20.0044792863216	20.1248269754683	18.910041969676	20.414814956395	19.4222174558982	21.3770826955544	19.7812455744501	12.7215862908649	16.3484924010317	17.3439595093395	15.0630827740276	19.5986361311957	19.070524705994	20.20031	17.85854	3	TARS	>tr|D6RCS6|D6RCS6_HUMAN Threonine--tRNA ligase, cytoplasmic OS=Homo sapiens GN=TARS PE=1 SV=1	2.34178	19.0294247946925	-2.55662070257659	0.0201664714613725	0.195558051397409	-3.32466649694863	9	9	+	-	-
>tr|B4DSN5|B4DSN5_HUMAN Tyrosine-protein phosphatase non-receptor type OS=Homo sapiens GN=PTPN1 PE=1 SV=1	20.0833827736828	18.9654932841523	19.5756489668169	20.02232492235	20.0442481986195	20.4939730125608	20.0009827914494	19.9001477863425	20.0998046196904	19.385277937605	19.8498572903193	19.3089530696403	19.0649700880343	19.860755165092	19.9519522051099	19.1164275531249	19.07228651205	18.6971758562971	19.90956	19.36752	20	PTPN1	>tr|B4DSN5|B4DSN5_HUMAN Tyrosine-protein phosphatase non-receptor type OS=Homo sapiens GN=PTPN1 PE=1 SV=1	0.542039	19.6385367796076	-2.5565680400714	0.0201686735691179	0.195558051397409	-3.32476292364861	9	9	-	-	-
>tr|A0A0C4DGV9|A0A0C4DGV9_HUMAN DNA ligase OS=Homo sapiens GN=LIG4 PE=1 SV=1	19.0030874981704	18.97567691766	18.9520519612243	14.176296595431	14.7824262303269	14.8399794469284	16.3771478788449	16.5692515371135	20.6043345346762	19.4982224601655	19.1466202692885	19.2140927630242	18.3386123876639	17.9448908608742	17.671728381394	20.559357215473	20.559357215473	20.1948891387676	17.14225	19.23642	38	LIG4	>tr|A0A0C4DGV9|A0A0C4DGV9_HUMAN DNA ligase OS=Homo sapiens GN=LIG4 PE=1 SV=1	-2.09417	18.1893346273611	2.55533473921016	0.0202203098638228	0.195558051397409	-3.32702089936141	9	9	+	-	+
>tr|B8ZZJ2|B8ZZJ2_HUMAN Actin, gamma-enteric smooth muscle OS=Homo sapiens GN=ACTG2 PE=1 SV=1	26.8774689629871	27.169975131102	26.5581575736178	27.5611057447553	27.5611057447553	27.3329980134267	26.8397565098139	26.8397565098139	26.7574759875356	26.6854030282364	27.0654408881994	25.522559894662	26.8397565098139	27.3329980134267	26.8397565098139	25.7495937896568	25.1848089158282	25.5289472920906	27.05531	26.30547	6	ACTG2	>tr|B8ZZJ2|B8ZZJ2_HUMAN Actin, gamma-enteric smooth muscle OS=Homo sapiens GN=ACTG2 PE=1 SV=1	0.749837	26.6803925010853	-2.5546701152994	0.0202481885246803	0.195558051397409	-3.32823753042586	9	9	-	-	-
>tr|I3L3W3|I3L3W3_HUMAN Methyltransferase-like protein 16 OS=Homo sapiens GN=METTL16 PE=1 SV=1	12.4224192026889	14.7167326930112	14.13805186881	14.4090180693649	16.4798806434217	14.4611666996009	16.8172110549465	14.0032631895794	12.6955218954773	14.0397456035719	16.8641047222376	13.693581294441	16.013266870007	17.2730419742253	15.2513214999096	17.469162184478	17.537173887984	17.9562459138765	14.46036	16.23307	7	METTL16	>tr|I3L3W3|I3L3W3_HUMAN Methyltransferase-like protein 16 OS=Homo sapiens GN=METTL16 PE=1 SV=1	-1.77271	15.3467171815351	2.55297690946513	0.0203193773654343	0.195856220716825	-3.33133644053767	9	9	-	-	-
>sp|P17480|UBF1_HUMAN Nucleolar transcription factor 1 OS=Homo sapiens GN=UBTF PE=1 SV=1	17.4436067433656	17.0162264101881	15.8872015834509	17.6862259369694	17.4602760611424	17.6675253425753	17.1822112716501	17.9383037283805	17.411192775527	17.9928770091441	17.0773475908445	17.6446954517906	19.4026116225805	19.0901459406227	18.9907273409188	17.6707238838282	18.0056642040693	17.4630040010279	17.2992	18.14864	33	UBTF	>sp|P17480|UBF1_HUMAN Nucleolar transcription factor 1 OS=Homo sapiens GN=UBTF PE=1 SV=1	-0.849447	17.7239203832264	2.54755944443538	0.0205487453163516	0.197235243451119	-3.34124572030322	9	9	-	-	-
>sp|Q1KMD3|HNRL2_HUMAN Heterogeneous nuclear ribonucleoprotein U-like protein 2 OS=Homo sapiens GN=HNRNPUL2 PE=1 SV=1	20.1121160901568	19.8286449971544	19.7997264451497	19.4439461821002	19.4945815688259	19.4199910247779	20.7143011336708	20.7759180441486	20.5707464420038	20.807035525584	20.0646060523164	20.4555513417078	21.0963655691219	20.2833027614692	20.1790907408361	20.8369236724026	20.8840300279692	20.7362938451702	20.01777	20.59369	33	HNRNPUL2	>sp|Q1KMD3|HNRL2_HUMAN Heterogeneous nuclear ribonucleoprotein U-like protein 2 OS=Homo sapiens GN=HNRNPUL2 PE=1 SV=1	-0.575914	20.3057317480314	2.54666546876101	0.0205868300382582	0.197235243451119	-3.34288007435097	9	9	-	+	+
>sp|Q15052|ARHG6_HUMAN Rho guanine nucleotide exchange factor 6 OS=Homo sapiens GN=ARHGEF6 PE=1 SV=2	13.4999372190525	15.0693528431247	12.5101898301935	13.9131927357843	13.8214030736244	12.4843460934607	15.4252334949646	15.517603992055	15.5448209254943	15.8466958241616	14.0893112515866	15.4289639724646	14.8774304845658	15.2038775105422	14.890411246946	16.0797389374933	15.7953880484114	16.0550330728659	14.19845	15.36298	39	ARHGEF6	>sp|Q15052|ARHG6_HUMAN Rho guanine nucleotide exchange factor 6 OS=Homo sapiens GN=ARHGEF6 PE=1 SV=2	-1.16453	14.7807183642662	2.54576054450731	0.0206254492875056	0.197235243451119	-3.34453419889718	9	9	-	-	-
>tr|K7EK69|K7EK69_HUMAN AP-1 complex subunit mu-2 (Fragment) OS=Homo sapiens GN=AP1M2 PE=1 SV=1	19.2874013314694	20.2321210762667	20.3137072521296	19.8899855257903	19.4932648115987	20.1719172839507	19.8417406741044	19.8378290968414	19.8456524581089	19.5745469844704	19.0214712363756	19.3999113419579	19.0129912378999	17.7961760543078	18.4343919534059	20.224307368128	19.2300361645245	19.9497440971721	19.87929	19.18262	3	AP1M2	>tr|K7EK69|K7EK69_HUMAN AP-1 complex subunit mu-2 (Fragment) OS=Homo sapiens GN=AP1M2 PE=1 SV=1	0.696671	19.5309553304723	-2.54423707680498	0.020690621052836	0.197235243451119	-3.34731840956773	9	9	-	-	-
>tr|F8WED3|F8WED3_HUMAN F-actin-capping protein subunit alpha-2 OS=Homo sapiens GN=CAPZA2 PE=1 SV=1	17.6390555573997	18.7146633776627	18.2965497599361	19.7062404127443	18.8659182804357	19.0979830316881	19.5191076645257	19.2232388865505	19.5350408352922	18.8527782992659	19.1517136728214	18.9722839522258	19.6932910643011	20.3890797662375	20.9460479029578	20.0027437571149	20.0662679492171	19.7818549855121	18.95531	19.76178	3	CAPZA2	>tr|F8WED3|F8WED3_HUMAN F-actin-capping protein subunit alpha-2 OS=Homo sapiens GN=CAPZA2 PE=1 SV=1	-0.806474	19.3585477308827	2.54401438525909	0.020700163803495	0.197235243451119	-3.34772533032868	9	9	-	+	-
>tr|Q5H918|Q5H918_HUMAN HIV Tat-specific factor 1 (Fragment) OS=Homo sapiens GN=HTATSF1 PE=1 SV=1	16.4272841684791	17.3581733562683	17.1319981426978	16.2751140124315	15.8505005742874	16.2064214282865	16.5842750982411	15.6464819732515	15.6888435709235	12.6955218954773	12.6955218954773	17.3267728519188	15.6999838584179	15.3625378007907	15.6796933690106	15.3657311497132	15.1783562708607	15.3592032377777	16.35212	15.04037	12	HTATSF1	>tr|Q5H918|Q5H918_HUMAN HIV Tat-specific factor 1 (Fragment) OS=Homo sapiens GN=HTATSF1 PE=1 SV=1	1.31175	15.6962452585728	-2.54301917420443	0.0207428614344907	0.197235243451119	-3.34954368046795	9	9	-	-	+
>sp|Q9H492|MLP3A_HUMAN Microtubule-associated proteins 1A/1B light chain 3A OS=Homo sapiens GN=MAP1LC3A PE=1 SV=2	15.4470845665102	16.4487186266415	16.7612979069151	12.6955218954773	12.6955218954773	12.6955218954773	17.4914221566831	17.0081764395218	17.1338470842034	16.5984646795603	17.0815168814179	16.9240139552	15.2861597925171	18.2098801497343	17.9278216320939	17.6764224017243	17.9476533250732	17.4637551315851	15.37523	17.23508	4	MAP1LC3A	>sp|Q9H492|MLP3A_HUMAN Microtubule-associated proteins 1A/1B light chain 3A OS=Homo sapiens GN=MAP1LC3A PE=1 SV=2	-1.85984	16.3051555786563	2.54293104086375	0.0207466466454347	0.197235243451119	-3.34970469444501	9	9	-	-	-
>tr|D6RE67|D6RE67_HUMAN Translation machinery-associated protein 16 OS=Homo sapiens GN=TMA16 PE=1 SV=1	12.6955218954773	12.6955218954773	12.6955218954773	12.6955218954773	12.6955218954773	12.6955218954773	12.6955218954773	12.6955218954773	12.6955218954773	12.6955218954773	12.6955218954773	12.6955218954773	16.9633941413996	17.7912058928154	16.7817399146116	15.6367221595815	12.6955218954773	12.6955218954773	12.69552	14.51674	3	TMA16	>tr|D6RE67|D6RE67_HUMAN Translation machinery-associated protein 16 OS=Homo sapiens GN=TMA16 PE=1 SV=1	-1.82122	13.6061315913939	2.54189680736225	0.020791114525109	0.197271942115195	-3.35159399708585	9	9	-	-	+
>sp|O75475|PSIP1_HUMAN PC4 and SFRS1-interacting protein OS=Homo sapiens GN=PSIP1 PE=1 SV=1	16.562562402079	16.8748286915552	14.4381018484254	15.5736425977865	14.3774189662698	16.905936399128	15.0038679997783	16.3325638672045	15.717300992745	15.6193307962542	15.3953020909582	17.5267123092506	18.064001696687	17.0444027689898	17.3136762505177	16.7651792208623	17.0916182535249	16.7056117277296	15.75402	16.8362	24	PSIP1	>sp|O75475|PSIP1_HUMAN PC4 and SFRS1-interacting protein OS=Homo sapiens GN=PSIP1 PE=1 SV=1	-1.08218	16.2951143822081	2.53755680956313	0.0209787029777936	0.198663818842341	-3.35951861815178	9	9	-	-	+
>tr|A0A087X2I4|A0A087X2I4_HUMAN Proteasome subunit beta type OS=Homo sapiens GN=PSMB6 PE=1 SV=1	20.6329076882172	21.409324647727	22.0535314443416	22.2436509434499	21.9226563664245	22.8752170358557	21.6846505089311	21.5039772938237	21.4013691166501	21.2642068232632	21.0930994636765	21.4433792303619	19.9203994189858	20.4444818300595	21.2233469543809	21.4949621714137	20.4088769178599	21.7561472784306	21.74748	21.00543	8	PSMB6	>tr|A0A087X2I4|A0A087X2I4_HUMAN Proteasome subunit beta type OS=Homo sapiens GN=PSMB6 PE=1 SV=1	0.742043	21.3764547296585	-2.53654690557551	0.02102258349573	0.198692044012172	-3.3613618311132	9	9	+	-	+
>sp|P15056|BRAF_HUMAN Serine/threonine-protein kinase B-raf OS=Homo sapiens GN=BRAF PE=1 SV=4	13.6182461609573	13.7100418216689	13.6225816018766	14.1786544807593	12.6955218954773	14.2007791677219	13.7373476589854	12.412472066533	12.621649279564	13.8079051508778	13.8384963058768	12.7542602085737	14.6841390643596	15.0085309133021	14.9812453373016	14.0297913271816	14.5523458766748	14.5820162956005	13.42192	14.24875	32	BRAF	>sp|P15056|BRAF_HUMAN Serine/threonine-protein kinase B-raf OS=Homo sapiens GN=BRAF PE=1 SV=4	-0.826826	13.8353347007384	2.53488460277919	0.0210950001435346	0.198742150311018	-3.36439508396813	9	9	-	-	+
>sp|Q05209|PTN12_HUMAN Tyrosine-protein phosphatase non-receptor type 12 OS=Homo sapiens GN=PTPN12 PE=1 SV=3	14.5606821804325	13.3032776479511	12.8214142801216	12.4700701391884	12.4627274860542	12.5301582185739	18.1189663780069	14.5174766306389	14.7846853599422	18.7649938854813	19.2843845749984	13.9331047466296	14.663260372423	14.6797905533604	14.2242473804614	14.5281168170735	18.4866547623349	18.926033607883	13.95216	16.38784	42	PTPN12	>sp|Q05209|PTN12_HUMAN Tyrosine-protein phosphatase non-receptor type 12 OS=Homo sapiens GN=PTPN12 PE=1 SV=3	-2.43568	15.1700025011975	2.53454770448551	0.0211097055497088	0.198742150311018	-3.36500972941656	9	9	+	-	-
>tr|A0A087X225|A0A087X225_HUMAN Ras GTPase-activating-like protein IQGAP1 (Fragment) OS=Homo sapiens GN=IQGAP1 PE=1 SV=1	12.6955218954773	12.6955218954773	12.6955218954773	12.6955218954773	12.6955218954773	12.6955218954773	12.6955218954773	12.6955218954773	12.6955218954773	16.8257660185884	15.6514489874421	16.9033936641065	12.7215862908649	12.6955218954773	12.6955218954773	12.6955218954773	15.3296038793956	12.6955218954773	12.69552	14.24599	3	IQGAP1	>tr|A0A087X225|A0A087X225_HUMAN Ras GTPase-activating-like protein IQGAP1 (Fragment) OS=Homo sapiens GN=IQGAP1 PE=1 SV=1	-1.55047	13.4707546378668	2.53305428624136	0.0211750092737975	0.198971363737153	-3.36773394036899	9	9	+	-	+
>tr|C9J2Z4|C9J2Z4_HUMAN EH domain-containing protein 1 (Fragment) OS=Homo sapiens GN=EHD1 PE=1 SV=1	21.1762616004571	21.0877362475888	21.4257523457953	21.0525217165916	20.5506062790453	21.0192169589213	20.4013277713584	21.0525217165916	21.1215636055248	19.9336146309039	20.1659197058825	20.4968388575304	19.6900268568533	20.6036588189787	19.2669968376388	20.2380822912539	21.2743882667948	21.371023863451	20.9875	20.33784	17	EHD1	>tr|C9J2Z4|C9J2Z4_HUMAN EH domain-containing protein 1 (Fragment) OS=Homo sapiens GN=EHD1 PE=1 SV=1	0.649662	20.662669909509	-2.52947874808241	0.0213321370413209	0.200060852792928	-3.37425346492245	9	9	-	+	-
>tr|H0YID6|H0YID6_HUMAN Keratin, type II cytoskeletal 79 (Fragment) OS=Homo sapiens GN=KRT79 PE=3 SV=1	18.684274487969	20.3000739763366	20.1531044409037	20.9768839632532	21.0906257655756	20.9312813226225	18.7386492996892	19.5942845910224	19.9438352553128	17.1755955331054	18.3788634383381	20.1547033374146	18.0599280289085	19.6362815766286	19.7836853838874	20.4459396141108	17.7047959666263	15.6683605612771	20.04589	18.55646	5	KRT79	>tr|H0YID6|H0YID6_HUMAN Keratin, type II cytoskeletal 79 (Fragment) OS=Homo sapiens GN=KRT79 PE=3 SV=1	1.48943	19.3011759190545	-2.52821218637105	0.0213880605217048	0.200198840104897	-3.37656193315493	9	9	-	-	-
>tr|A0A0J9YYJ0|A0A0J9YYJ0_HUMAN Protein canopy homolog 4 (Fragment) OS=Homo sapiens GN=CNPY4 PE=1 SV=1	15.5509213474087	15.9802191814515	15.9921241651068	17.7408824440328	17.3445145158988	18.0869392778968	16.3659698009275	16.0739900330364	16.4714301915163	16.2938266324607	16.6818872381434	14.1520856759279	12.7215862908649	15.2146842396095	15.2546287901515	16.0835407404327	16.121342236165	15.8293112094868	16.623	15.37254	7	CNPY4	>tr|A0A0J9YYJ0|A0A0J9YYJ0_HUMAN Protein canopy homolog 4 (Fragment) OS=Homo sapiens GN=CNPY4 PE=1 SV=1	1.25046	15.9977713339177	-2.52529958750732	0.0215171894653218	0.201020204658718	-3.38186863916167	9	9	-	-	-
>sp|Q7Z7N9|T179B_HUMAN Transmembrane protein 179B OS=Homo sapiens GN=TMEM179B PE=1 SV=1	12.6955218954773	12.6955218954773	12.6955218954773	12.6955218954773	12.6955218954773	12.6955218954773	12.6955218954773	12.6955218954773	12.6955218954773	15.4053993485292	15.336659934612	12.6955218954773	12.7215862908649	17.0416299877813	16.1633582131077	12.6955218954773	12.6955218954773	12.6955218954773	12.69552	14.16119	9	TMEM179B	>sp|Q7Z7N9|T179B_HUMAN Transmembrane protein 179B OS=Homo sapiens GN=TMEM179B PE=1 SV=1	-1.46567	13.4283565786722	2.52255979534838	0.0216393299528649	0.201773253188134	-3.38685810665128	9	9	-	-	-
>tr|K7EQI0|K7EQI0_HUMAN Granulins (Fragment) OS=Homo sapiens GN=GRN PE=1 SV=1	12.6955218954773	12.6955218954773	12.6955218954773	17.9339824001193	17.863176165819	17.5575266932188	15.863024226883	15.6022097185858	12.6955218954773	19.7043479898345	15.1934315042028	16.4528139929434	17.3772762095978	18.1921685268808	18.5449560100205	16.6014073626217	16.8676712327058	16.6218112701683	15.06689	17.28399	6	GRN	>tr|K7EQI0|K7EQI0_HUMAN Granulins (Fragment) OS=Homo sapiens GN=GRN PE=1 SV=1	-2.2171	16.1754383825284	2.52072445134995	0.0217215164103412	0.202151583757543	-3.39019917513721	9	9	-	-	-
>sp|O43709|WBS22_HUMAN Probable 18S rRNA (guanine-N(7))-methyltransferase OS=Homo sapiens GN=WBSCR22 PE=1 SV=2	16.9573483449758	17.4347460470468	16.8896496011389	16.3048218126233	15.0430059397546	16.2307332220918	17.3451177872299	16.7252215515025	16.9822104411272	16.7889714807848	17.0030082143227	17.2689754662076	17.703505353989	17.4758760776929	17.8862001319857	17.3826333201072	16.9833616055252	17.6313089323492	16.65698	17.34709	9	WBSCR22	>sp|O43709|WBS22_HUMAN Probable 18S rRNA (guanine-N(7))-methyltransferase OS=Homo sapiens GN=WBSCR22 PE=1 SV=2	-0.69011	17.0020386294697	2.5176170510247	0.021861338708692	0.202363162475287	-3.39585352047843	9	9	+	-	-
>sp|Q99584|S10AD_HUMAN Protein S100-A13 OS=Homo sapiens GN=S100A13 PE=1 SV=1	21.865216782579	21.8515055972038	21.7905967487779	21.7139929768166	21.0219042396306	21.470137493061	21.6258106978186	20.8509246968874	21.1831951142555	21.3759998662644	21.1139131348631	20.735038475831	21.0510517042641	21.5350695042903	20.8432575252967	20.6644851173441	21.0837942338711	21.0467089295479	21.48592	21.04992	5	S100A13	>sp|Q99584|S10AD_HUMAN Protein S100-A13 OS=Homo sapiens GN=S100A13 PE=1 SV=1	0.435996	21.2679223799224	-2.51757050506381	0.0218634395710981	0.202363162475287	-3.39593819451324	9	9	+	-	+
>sp|Q9GZM8|NDEL1_HUMAN Nuclear distribution protein nudE-like 1 OS=Homo sapiens GN=NDEL1 PE=1 SV=1	12.6955218954773	12.6955218954773	12.6955218954773	13.8545581897179	12.6955218954773	12.6955218954773	12.4460949424962	11.4187161164711	12.535853576623	13.2775585599978	12.6955218954773	12.6955218954773	14.6065171009217	12.6955218954773	12.6955218954773	14.417094962769	15.1162642551108	14.0893112515866	12.63698	13.58765	19	NDEL1	>sp|Q9GZM8|NDEL1_HUMAN Nuclear distribution protein nudE-like 1 OS=Homo sapiens GN=NDEL1 PE=1 SV=1	-0.950667	13.1123147786105	2.51657935836796	0.0219082205320311	0.202363162475287	-3.39774107807906	9	9	+	-	-
>sp|Q9NRP0|OSTC_HUMAN Oligosaccharyltransferase complex subunit OSTC OS=Homo sapiens GN=OSTC PE=1 SV=1	18.6882306920926	18.4064167697249	18.5853995744575	17.2428227720313	16.9015274152906	17.0106662625855	16.7600223806835	15.382401757775	16.6293020104438	15.6041317769851	14.2155935800863	18.0658823279219	12.7215862908649	12.6955218954773	16.3055905371444	16.8253146633923	17.0213330987355	16.1709132894241	17.28964	15.51399	6	OSTC	>sp|Q9NRP0|OSTC_HUMAN Oligosaccharyltransferase complex subunit OSTC OS=Homo sapiens GN=OSTC PE=1 SV=1	1.77566	16.401814283062	-2.51652069977094	0.0219108734997944	0.202363162475287	-3.39784776776441	9	9	-	-	-
>sp|Q9NVP1|DDX18_HUMAN ATP-dependent RNA helicase DDX18 OS=Homo sapiens GN=DDX18 PE=1 SV=2	18.4025887815286	18.89723751538	18.9017258915046	19.2956948110404	20.2230618169164	20.0325743852267	19.2300361645245	19.4039546181485	19.3222763116775	19.7160910092084	19.2744138930701	19.5963894613193	20.696814824498	20.8914516645416	19.6231440363058	19.8162795671376	20.0348919477917	19.9362358481444	19.30102	19.95397	32	DDX18	>sp|Q9NVP1|DDX18_HUMAN ATP-dependent RNA helicase DDX18 OS=Homo sapiens GN=DDX18 PE=1 SV=2	-0.652951	19.6274923637758	2.51000569606999	0.0222074265816006	0.204712862112743	-3.40969073813731	9	9	-	+	-
>sp|P43378|PTN9_HUMAN Tyrosine-protein phosphatase non-receptor type 9 OS=Homo sapiens GN=PTPN9 PE=1 SV=1	13.4463860718683	13.5937640130877	14.2094767441127	13.7874890114878	14.7505960425076	12.6955218954773	12.1980336276593	13.6956115686082	13.2077271138747	12.9029026402189	12.5703858898494	13.0025752684789	12.7215862908649	12.6955218954773	12.6955218954773	12.146816386201	13.4344355815833	13.0624552650217	13.5094	12.80358	31	PTPN9	>sp|P43378|PTN9_HUMAN Tyrosine-protein phosphatase non-receptor type 9 OS=Homo sapiens GN=PTPN9 PE=1 SV=1	0.705823	13.156489288992	-2.50596852432634	0.0223930915949135	0.205939839375166	-3.41702284127972	9	9	+	-	-
>sp|P48448|AL3B2_HUMAN Aldehyde dehydrogenase family 3 member B2 OS=Homo sapiens GN=ALDH3B2 PE=2 SV=3	12.6955218954773	12.6955218954773	12.6955218954773	12.6955218954773	12.6955218954773	12.6955218954773	13.5234455577759	13.422886667564	13.2615488633886	15.0531846859963	15.1162642551108	12.6955218954773	12.7215862908649	12.6955218954773	12.6955218954773	14.7632201643003	14.9995910437832	14.7598727653287	12.93122	13.94448	18	ALDH3B2	>sp|P48448|AL3B2_HUMAN Aldehyde dehydrogenase family 3 member B2 OS=Homo sapiens GN=ALDH3B2 PE=2 SV=3	-1.01325	13.4378498529671	2.50527109161427	0.0224253139212563	0.205939839375166	-3.41828896399039	9	9	-	-	-
>sp|P10301|RRAS_HUMAN Ras-related protein R-Ras OS=Homo sapiens GN=RRAS PE=1 SV=1	19.309628335123	18.947410347089	19.1244117366336	19.6437398376787	19.2951223620787	19.2724892103805	19.4588375134184	19.6825735131264	19.7583638919622	20.2689177913792	20.7556688955476	19.0077639240159	20.4480809832586	21.6820650514042	20.886165347735	20.0985310335833	19.0537124307706	19.3374908187695	19.38806	20.17093	13	RRAS	>sp|P10301|RRAS_HUMAN Ras-related protein R-Ras OS=Homo sapiens GN=RRAS PE=1 SV=1	-0.782869	19.7794985013308	2.50241508880591	0.022557722518219	0.206578925079841	-3.42347216727684	9	9	-	+	-
>sp|Q9HAU5|RENT2_HUMAN Regulator of nonsense transcripts 2 OS=Homo sapiens GN=UPF2 PE=1 SV=1	18.0773665889029	17.8648068207518	18.0341639925794	18.9077391077395	18.5711558454912	19.1403442842804	18.8998095141305	18.7872889418274	18.7588697486972	18.887494831373	18.7380887610805	18.1570072013317	19.9156754612685	20.4066134463893	20.5428210002565	19.2407625496379	19.0106886918848	19.0224782565498	18.56017	19.32463	54	UPF2	>sp|Q9HAU5|RENT2_HUMAN Regulator of nonsense transcripts 2 OS=Homo sapiens GN=UPF2 PE=1 SV=1	-0.764454	18.9423986135651	2.50193714955533	0.0225799524943178	0.206578925079841	-3.42433930184367	9	9	+	-	+
>tr|M0QYM5|M0QYM5_HUMAN Heterogeneous nuclear ribonucleoprotein U-like protein 1 (Fragment) OS=Homo sapiens GN=HNRNPUL1 PE=1 SV=1	20.7287570195853	21.8030373297881	21.6334502682187	20.0275927803391	20.9569696106896	19.4823578568415	21.8223976692223	21.6784548353435	21.7866330941951	20.9786152205451	20.2070380956859	19.2300361645245	20.4790958014394	20.2432083447687	18.4489062064622	21.086479161726	20.2034263054719	20.2364457309475	21.10218	20.12369	5	HNRNPUL1	>tr|M0QYM5|M0QYM5_HUMAN Heterogeneous nuclear ribonucleoprotein U-like protein 1 (Fragment) OS=Homo sapiens GN=HNRNPUL1 PE=1 SV=1	0.978489	20.6129389719886	-2.49862284562434	0.0227346779295841	0.206855480917121	-3.43035052240377	9	9	-	-	+
>sp|P51151|RAB9A_HUMAN Ras-related protein Rab-9A OS=Homo sapiens GN=RAB9A PE=1 SV=1	13.5523841966646	15.6385035662769	15.5692769078464	18.2865332941531	18.2369249904923	18.143627641338	15.6898146295519	15.7552973988715	15.1713880533882	18.0599280289085	16.0556725503638	17.9262357060216	16.462005515369	17.5180527412756	17.5689315723322	19.0405166367498	18.6982596341938	18.670388886693	16.22708	17.77778	12	RAB9A	>sp|P51151|RAB9A_HUMAN Ras-related protein Rab-9A OS=Homo sapiens GN=RAB9A PE=1 SV=1	-1.55069	17.0024301083606	2.49734146922053	0.0227947657801851	0.206855480917121	-3.43267364874484	9	9	-	-	-
>tr|H0YM76|H0YM76_HUMAN WD repeat-containing protein 61 OS=Homo sapiens GN=WDR61 PE=1 SV=1	16.5903476137785	17.4305874168658	18.7999858962905	17.6421806534995	17.6837314053796	17.4001873211596	12.6955218954773	12.6955218954773	16.0264505475944	17.7259202015531	18.4406858206148	18.6254788518118	18.2397211623202	16.8907747107515	17.3668651158287	18.8197664005923	18.0694671004014	19.8274620734393	16.32939	18.2229	3	WDR61	>tr|H0YM76|H0YM76_HUMAN WD repeat-containing protein 61 OS=Homo sapiens GN=WDR61 PE=1 SV=1	-1.89351	17.2761475601575	2.49711190610965	0.0228055465547126	0.206855480917121	-3.43308979004538	9	9	+	-	+
>tr|R4GMV2|R4GMV2_HUMAN General transcription factor IIH subunit 2 (Fragment) OS=Homo sapiens GN=GTF2H2 PE=4 SV=1	20.3384335180061	19.4222174558982	19.2243230283601	21.3388196243424	21.2594507590803	20.9674680480372	20.5785712777424	20.9488999839125	20.8907032499699	18.9638305163707	18.3572882108666	19.433667716354	17.7335018275547	19.4617089154659	16.7009282423914	20.4141349111908	21.0568936679685	20.8806932395802	20.5521	19.22252	2	GTF2H2	>tr|R4GMV2|R4GMV2_HUMAN General transcription factor IIH subunit 2 (Fragment) OS=Homo sapiens GN=GTF2H2 PE=4 SV=1	1.32958	19.8873074551718	-2.49619304210617	0.0228487465824533	0.206855480917121	-3.4347552964127	9	9	-	-	-
>tr|K7EL62|K7EL62_HUMAN Guanine nucleotide-binding protein subunit alpha-11 (Fragment) OS=Homo sapiens GN=GNA11 PE=1 SV=1	19.997316795801	18.5853995744575	19.0483224369002	19.6213975383756	19.5115744576698	20.0564345753934	18.3470847650878	18.6856821167882	17.7282713914112	18.1451755670127	17.6132813111612	18.3550064629043	18.3681225069094	18.8813068824171	18.7114365455974	17.9706425685106	18.7523829930665	18.0887203053125	19.06461	18.32068	12	GNA11	>tr|K7EL62|K7EL62_HUMAN Guanine nucleotide-binding protein subunit alpha-11 (Fragment) OS=Homo sapiens GN=GNA11 PE=1 SV=1	0.743934	18.6926421552653	-2.4960230442486	0.0228567474275854	0.206855480917121	-3.43506340023747	9	9	+	-	-
>sp|P06703|S10A6_HUMAN Protein S100-A6 OS=Homo sapiens GN=S100A6 PE=1 SV=1	22.6758303780936	23.3909748124427	23.3774792592551	24.8067353528428	24.8631273250648	21.1681012782147	19.4631153818969	19.9707910656503	23.0761300886169	21.6362520928741	21.2746974091927	21.9023948630287	20.2179321228059	21.3934079551896	19.984049374056	20.0760061644166	20.6453226892142	20.7091059930515	22.53248	20.87102	3	S100A6	>sp|P06703|S10A6_HUMAN Protein S100-A6 OS=Homo sapiens GN=S100A6 PE=1 SV=1	1.66146	21.7017474225504	-2.49407178474412	0.0229487718423447	0.206855480917121	-3.43859920187517	9	9	+	-	+
>tr|H0YIE4|H0YIE4_HUMAN Paxillin (Fragment) OS=Homo sapiens GN=PXN PE=1 SV=1	12.6955218954773	14.1051624427383	13.4820404856971	15.5036986962755	14.5392707912504	14.3857333614242	14.176296595431	14.2745865671889	12.6955218954773	14.2436696749759	12.6955218954773	13.847839955546	12.7215862908649	12.6955218954773	12.6955218954773	12.6955218954773	12.6955218954773	13.5267870357622	13.9842	13.09083	9	PXN	>tr|H0YIE4|H0YIE4_HUMAN Paxillin (Fragment) OS=Homo sapiens GN=PXN PE=1 SV=1	0.893371	13.5375180647498	-2.49389117443584	0.0229573073629548	0.206855480917121	-3.43892641757508	9	9	+	-	+
>tr|H0YNU7|H0YNU7_HUMAN Ceramide synthase 2 OS=Homo sapiens GN=CERS2 PE=1 SV=2	16.0857221053336	16.9015274152906	17.1493467014473	17.7085204506655	17.9322272484144	17.6904937340095	14.5536783779555	12.5301582185739	12.6955218954773	12.6955218954773	12.6955218954773	16.7948976305591	12.7215862908649	16.4001531028868	15.0517085922864	11.5656829307515	12.631583211514	11.7512672081306	15.91636	13.58977	16	CERS2	>tr|H0YNU7|H0YNU7_HUMAN Ceramide synthase 2 OS=Homo sapiens GN=CERS2 PE=1 SV=2	2.32659	14.7530621613953	-2.49320996981398	0.0229895276007492	0.206855480917121	-3.44016047764315	9	9	-	+	-
>tr|E9PS69|E9PS69_HUMAN Squalene synthase OS=Homo sapiens GN=FDFT1 PE=1 SV=1	15.9984813490115	16.1866015621681	15.2648263451539	12.6955218954773	12.6955218954773	12.6955218954773	18.7174292218862	18.6167020608311	18.92202242436	19.5925766220993	19.0401372871445	18.7272923494017	16.8915188510356	15.7981971545538	16.0621600227162	19.4186744424388	18.9202559332897	19.1407526304033	15.75474	18.17684	7	FDFT1	>tr|E9PS69|E9PS69_HUMAN Squalene synthase OS=Homo sapiens GN=FDFT1 PE=1 SV=1	-2.4221	16.9657885523848	2.49312806186742	0.0229934046305568	0.206855480917121	-3.44030885089719	9	9	-	-	-
>tr|D3DQ64|D3DQ64_HUMAN Adenylate kinase 4, mitochondrial OS=Homo sapiens GN=AK4 PE=1 SV=1	17.2124479742406	16.0692635678663	13.4599496398284	18.3533132557982	18.3855496843637	18.4730263387147	13.8282793677584	16.0339870403715	14.0867206798261	14.4928808957288	15.6712458817084	15.1638943772868	17.168457429582	12.6955218954773	12.6955218954773	13.4439331644254	13.2566403039008	12.6955218954773	16.21139	14.14262	10	AK4	>tr|D3DQ64|D3DQ64_HUMAN Adenylate kinase 4, mitochondrial OS=Homo sapiens GN=AK4 PE=1 SV=1	2.06877	15.1770086271018	-2.49195972128445	0.0230487740673028	0.20697032240103	-3.44242502446156	9	9	-	-	-
>tr|A0A087WX08|A0A087WX08_HUMAN Gamma-adducin OS=Homo sapiens GN=ADD3 PE=1 SV=1	20.6232276499468	21.3807375228198	19.7970388196639	22.329820064549	22.0309161672317	21.9470951834729	21.708106095832	20.4741985009214	20.7012432803671	21.3394746125048	21.6099282557364	21.6513299256855	23.1429181595849	22.6213126104917	22.7676019322734	22.4951942527012	21.2790594216395	22.1267518794631	21.22138	22.11484	28	ADD3	>tr|A0A087WX08|A0A087WX08_HUMAN Gamma-adducin OS=Homo sapiens GN=ADD3 PE=1 SV=1	-0.893465	21.6681085741603	2.48862893059414	0.0232073167376147	0.207235529122086	-3.44845557535703	9	9	-	+	-
>tr|E9PEW0|E9PEW0_HUMAN Ubiquitin carboxyl-terminal hydrolase 36 OS=Homo sapiens GN=USP36 PE=1 SV=2	12.6955218954773	12.6955218954773	12.6078333814455	12.6619909578543	13.7223934743453	12.6955218954773	14.3877260309476	12.6955218954773	14.5718959147004	12.9662122038944	13.3628788889378	12.1716786662147	16.7398425849708	14.4965993923029	15.2986906512289	15.8058389475819	15.4261339530119	14.6149018170386	13.19266	14.54253	28	USP36	>tr|E9PEW0|E9PEW0_HUMAN Ubiquitin carboxyl-terminal hydrolase 36 OS=Homo sapiens GN=USP36 PE=1 SV=2	-1.34987	13.8675946914658	2.48841821550455	0.0232173811147257	0.207235529122086	-3.44883696552388	9	9	-	-	+
>sp|Q86X83|COMD2_HUMAN COMM domain-containing protein 2 OS=Homo sapiens GN=COMMD2 PE=1 SV=2	14.6383080571167	14.4670907641641	14.7598727653287	12.6955218954773	12.6559445819302	12.6955218954773	15.8095038293567	16.0074834112265	15.9887993328878	14.4434181570049	15.4333900362994	15.0740728090983	16.2418524440488	16.5541137246533	16.6776770070848	15.8840097638856	15.7700758002492	15.2250986230101	14.41312	15.70041	10	COMMD2	>sp|Q86X83|COMD2_HUMAN COMM domain-containing protein 2 OS=Homo sapiens GN=COMMD2 PE=1 SV=2	-1.2873	15.0567641610166	2.4880658494241	0.0232342203636236	0.207235529122086	-3.44947470944599	9	9	-	-	-
>sp|P08240|SRPR_HUMAN Signal recognition particle receptor subunit alpha OS=Homo sapiens GN=SRPR PE=1 SV=2	19.7818549855121	19.8244270658538	18.949665274276	22.2635525408245	22.0087092988484	21.881833786788	17.8525311019302	17.4475407160584	18.1070989337845	18.62845090721	18.5527232637561	19.0755593825772	17.6758765676408	18.8573722323704	18.4500408698105	17.2119303273039	17.655836961416	17.6707238838282	19.7908	18.19761	29	SRPR	>sp|P08240|SRPR_HUMAN Signal recognition particle receptor subunit alpha OS=Homo sapiens GN=SRPR PE=1 SV=2	1.59319	18.9942071166549	-2.48747096126404	0.023262675667015	0.207235529122086	-3.45055130149472	9	9	-	+	-
>sp|Q99661|KIF2C_HUMAN Kinesin-like protein KIF2C OS=Homo sapiens GN=KIF2C PE=1 SV=2	16.5551753906697	16.718995351152	17.1422820692896	17.7346449889571	17.7737907077815	17.5871340287116	15.7768353251495	15.8987219171846	16.4751083858961	18.5059101158685	17.4481058993011	17.3885432118801	17.5212119911479	17.915797467472	17.9888688536545	17.2504851279629	17.4606268855737	16.8560426143772	16.85141	17.59284	36	KIF2C	>sp|Q99661|KIF2C_HUMAN Kinesin-like protein KIF2C OS=Homo sapiens GN=KIF2C PE=1 SV=2	-0.741434	17.2221266851128	2.48686694444108	0.0232916012557965	0.207235529122086	-3.45164429804588	9	9	-	+	+
>tr|A0A0J9YVX1|A0A0J9YVX1_HUMAN Sortilin (Fragment) OS=Homo sapiens GN=SORT1 PE=1 SV=1	14.8991246429411	16.924748720954	16.9071377168726	18.0162901117429	17.4143248251145	17.3811814850719	15.9449489626967	12.6955218954773	16.4929483938262	17.1698032822743	17.4698042024373	17.9305732109233	18.4788185832065	19.6886763954572	19.2048729529527	16.4380172870691	16.9707759650955	17.3859686234026	16.29736	17.8597	4	SORT1	>tr|A0A0J9YVX1|A0A0J9YVX1_HUMAN Sortilin (Fragment) OS=Homo sapiens GN=SORT1 PE=1 SV=1	-1.56234	17.0785298476398	2.48429121189264	0.0234153310086824	0.207955535722448	-3.45630389247142	9	9	-	-	-
>tr|R4GND3|R4GND3_HUMAN Pleckstrin homology-like domain family A member 1 OS=Homo sapiens GN=PHLDA1 PE=1 SV=1	22.7552076390469	22.2421451220973	22.4770867427373	21.001425131248	20.8389479445837	20.8476311755803	22.5131408363169	22.5614564152058	22.4842788974673	19.7155907075564	19.9944965087781	22.2339993263739	17.8113405372022	21.4248879993708	18.4313011764406	19.940548763906	22.3767128733868	22.2237822652515	21.96904	20.46141	8	PHLDA1	>tr|R4GND3|R4GND3_HUMAN Pleckstrin homology-like domain family A member 1 OS=Homo sapiens GN=PHLDA1 PE=1 SV=1	1.50763	21.2152211145861	-2.48162671306077	0.0235439769468998	0.208716496365035	-3.461121824779	9	9	-	-	-
>sp|Q9P2W9|STX18_HUMAN Syntaxin-18 OS=Homo sapiens GN=STX18 PE=1 SV=1	16.4095496664338	17.5356194733877	17.4327714562737	15.4885513861349	16.3906007603485	16.8649126929207	16.5422755815314	16.7657683758454	16.383011772556	12.8902713867579	14.7387191430127	17.2434169799383	16.0828269870052	15.4481518124185	16.3592906882872	15.7010218251435	15.0122975067409	16.275480086683	16.6459	15.52794	16	STX18	>sp|Q9P2W9|STX18_HUMAN Syntaxin-18 OS=Homo sapiens GN=STX18 PE=1 SV=1	1.11795	16.0869187545233	-2.47772689313821	0.0237334680638981	0.210013092630997	-3.46816933205029	9	9	-	+	-
>sp|O00139|KIF2A_HUMAN Kinesin-like protein KIF2A OS=Homo sapiens GN=KIF2A PE=1 SV=3	18.0730325088654	18.6017179720848	18.3706976403373	18.115034421442	17.6460726103841	18.2471947861659	18.6838275916937	18.9659917457807	18.9240894025617	18.6913167277918	19.1210985134158	18.6007387978252	18.8023958541448	18.880034011595	19.1179198327117	19.0025520851365	18.4640550150175	18.9001985359162	18.40307	18.84226	33	KIF2A	>sp|O00139|KIF2A_HUMAN Kinesin-like protein KIF2A OS=Homo sapiens GN=KIF2A PE=1 SV=3	-0.439183	18.6226648918261	2.47505942478301	0.023863906578607	0.210569207951673	-3.47298697970459	9	9	-	+	-
>sp|Q9H330|TM245_HUMAN Transmembrane protein 245 OS=Homo sapiens GN=TMEM245 PE=1 SV=2	19.3532732921336	19.2148357750536	19.3474449822723	17.5212119911479	17.1252272923614	17.1672336151078	18.315927414436	18.4226887347351	18.0720385581336	18.293492141592	18.3386123876639	16.4837405058569	15.6100126275644	15.8029536377751	15.7153749306956	17.1049258551159	18.2590132275904	18.1189663780069	18.28221	17.08079	31	TMEM245	>sp|Q9H330|TM245_HUMAN Transmembrane protein 245 OS=Homo sapiens GN=TMEM245 PE=1 SV=2	1.20142	17.6814985192912	-2.47467003557607	0.0238830040307476	0.210569207951673	-3.47369005290978	9	9	-	-	-
>sp|Q96RQ1|ERGI2_HUMAN Endoplasmic reticulum-Golgi intermediate compartment protein 2 OS=Homo sapiens GN=ERGIC2 PE=1 SV=2	18.7698920590613	18.4724613604297	18.3360549097234	17.2155279802177	17.6256532483349	17.2311462411029	19.0954022462377	18.7558829949006	19.0501344898812	19.0039968660563	19.0234486018472	19.3628745431933	18.949665274276	18.3934853402916	18.2111362951217	19.1831848672325	20.0545074939437	19.1466202692885	18.28357	19.03655	18	ERGIC2	>sp|Q96RQ1|ERGI2_HUMAN Endoplasmic reticulum-Golgi intermediate compartment protein 2 OS=Homo sapiens GN=ERGIC2 PE=1 SV=2	-0.752974	18.66005972673	2.47295913542306	0.0239670853049787	0.210927718136932	-3.47677863614706	9	9	-	+	-
>tr|A0A0A6YYC2|A0A0A6YYC2_HUMAN Serine/threonine-protein kinase Kist OS=Homo sapiens GN=UHMK1 PE=1 SV=1	17.6138634288243	19.2250285326439	19.001433481898	18.1830848954956	18.2972971617097	12.6955218954773	19.7970388196639	19.7666611266809	20.2327366881906	13.0283565870309	19.4395872495925	19.3606918746722	12.7215862908649	12.6955218954773	12.6955218954773	12.6955218954773	14.3200381173603	19.5668845502145	18.31252	15.1693	17	UHMK1	>tr|A0A0A6YYC2|A0A0A6YYC2_HUMAN Serine/threonine-protein kinase Kist OS=Homo sapiens GN=UHMK1 PE=1 SV=1	3.14322	16.740909799264	-2.47203905045046	0.0240124176517452	0.210944529750774	-3.47843921593938	9	9	-	-	+
>tr|U3KPS5|U3KPS5_HUMAN Triosephosphate isomerase (Fragment) OS=Homo sapiens GN=TPI1 PE=1 SV=6	21.5876698415038	22.6178843717564	22.250405301638	22.0075925838757	21.715839740769	21.5350695042903	21.810671932935	21.4983191476971	21.5227768417867	20.7433365315824	20.7402630408905	21.6810403906373	22.211513773116	21.5095713726313	20.2154698254202	21.3094057220654	21.3597589705087	21.4133060796742	21.83847	21.24263	3	TPI1	>tr|U3KPS5|U3KPS5_HUMAN Triosephosphate isomerase (Fragment) OS=Homo sapiens GN=TPI1 PE=1 SV=6	0.59584	21.5405497207099	-2.4705616293674	0.0240853788630616	0.211005208969385	-3.48110510607289	9	9	-	-	+
>tr|D3YTH5|D3YTH5_HUMAN Protein TSSC1 OS=Homo sapiens GN=TSSC1 PE=1 SV=1	14.890411246946	15.5334253580287	16.0828269870052	17.2954981857161	16.7523569724355	17.163947415646	15.228085082684	15.2373226626671	14.2726792084815	16.392548771801	15.499010060359	19.5366445461379	17.7152677052321	17.3131963134645	17.7549757921238	16.4312201924899	17.2735016259135	16.0347893194237	15.82851	17.10568	16	TSSC1	>tr|D3YTH5|D3YTH5_HUMAN Protein TSSC1 OS=Homo sapiens GN=TSSC1 PE=1 SV=1	-1.27718	16.467094858142	2.46878090215394	0.0241735961809314	0.211005208969385	-3.48431734318631	9	9	-	-	-
>sp|Q9BXR0|TGT_HUMAN Queuine tRNA-ribosyltransferase OS=Homo sapiens GN=QTRT1 PE=1 SV=3	12.6955218954773	12.9372884541315	12.6955218954773	14.0726525536326	14.2053050476434	14.4951564194807	14.0297913271816	13.7017534358429	13.4068387320253	15.921074091191	16.3255571439382	12.8073485058196	15.2135313470733	15.2073023660368	15.5237346876772	13.2698620009014	13.0770136603663	15.8664460450442	13.5822	14.80132	17	QTRT1	>sp|Q9BXR0|TGT_HUMAN Queuine tRNA-ribosyltransferase OS=Homo sapiens GN=QTRT1 PE=1 SV=3	-1.21912	14.1917610893856	2.46840556070833	0.0241922294155554	0.211005208969385	-3.48499428611969	9	9	-	-	+
>tr|M0R3J3|M0R3J3_HUMAN Far upstream element-binding protein 2 (Fragment) OS=Homo sapiens GN=KHSRP PE=1 SV=1	20.0055780328168	20.5461717247563	20.5428210002565	20.8321606228847	20.4900944412334	20.5446866158746	21.5504041724379	21.3579088032099	21.17149429813	20.5341084575016	20.8337156940832	21.079853956419	21.4123857848126	21.877410621227	22.2723585917288	21.324004120685	21.5994269727368	21.5641366983908	20.78237	21.3886	8	KHSRP	>tr|M0R3J3|M0R3J3_HUMAN Far upstream element-binding protein 2 (Fragment) OS=Homo sapiens GN=KHSRP PE=1 SV=1	-0.606231	21.085484478288	2.46838877007358	0.0241930632762346	0.211005208969385	-3.48502456760966	9	9	-	+	+
>sp|Q2PPJ7|RGPA2_HUMAN Ral GTPase-activating protein subunit alpha-2 OS=Homo sapiens GN=RALGAPA2 PE=1 SV=2	14.8635116512044	14.0867206798261	14.3989216292525	16.1919724530018	16.0807015607581	16.1349610567556	15.3052623147246	15.2811616246098	15.2082552854912	15.0299727440314	15.202595296242	13.2943116763763	14.7207400337226	14.4951564194807	11.8991431700226	13.1765297619227	15.0584795228859	14.81061224124	15.2835	14.1875	95	RALGAPA2	>sp|Q2PPJ7|RGPA2_HUMAN Ral GTPase-activating protein subunit alpha-2 OS=Homo sapiens GN=RALGAPA2 PE=1 SV=2	1.09599	14.7355005067527	-2.46730241396316	0.0242470717430962	0.211097266179142	-3.48698358801626	9	9	+	-	-
>sp|Q9Y2L5|TPPC8_HUMAN Trafficking protein particle complex subunit 8 OS=Homo sapiens GN=TRAPPC8 PE=1 SV=2	15.2236127327373	15.8920460513446	15.7243265810005	15.7095926311763	15.4968624582406	15.6592814519278	16.405820795563	16.4348146444429	16.4195472242454	15.661800074222	16.2026637177005	16.2105369672137	17.5338070103739	16.4348146444429	17.1863113256369	16.2926778861814	16.5155465155147	16.3082070683644	15.8851	16.48293	72	TRAPPC8	>sp|Q9Y2L5|TPPC8_HUMAN Trafficking protein particle complex subunit 8 OS=Homo sapiens GN=TRAPPC8 PE=1 SV=2	-0.597829	16.1840149877961	2.46452081996188	0.0243858774888363	0.211925926369887	-3.49199786324046	9	9	-	-	-
>tr|H0YLZ1|H0YLZ1_HUMAN Eukaryotic translation initiation factor 5 (Fragment) OS=Homo sapiens GN=EIF5 PE=1 SV=1	18.5338436648752	19.2550642059597	19.3267403180036	20.1390983364994	18.62693946738	18.6459915514036	19.3613522256313	19.0970715094322	20.3544116373714	21.4994886602944	20.3851797625719	20.4396530921125	19.1772166800174	20.4804643573286	18.5819940541016	19.4106854471644	20.8784507492156	20.667687952413	19.26006	20.16898	10	EIF5	>tr|H0YLZ1|H0YLZ1_HUMAN Eukaryotic translation initiation factor 5 (Fragment) OS=Homo sapiens GN=EIF5 PE=1 SV=1	-0.908923	19.7145185373209	2.4607108010336	0.02457721795206	0.212609377664323	-3.49886192532809	9	9	+	-	-
>tr|Q5SWX9|Q5SWX9_HUMAN Nucleoprotein TPR (Fragment) OS=Homo sapiens GN=TPR PE=1 SV=1	16.1221459190844	16.5057138166509	16.5712772622569	12.6955218954773	12.6955218954773	12.6955218954773	14.924192080949	16.8819330156649	14.9471403635126	16.905936399128	17.3600415269088	16.9541624363331	12.7215862908649	17.0802948593096	17.6328665714395	17.1853389199993	17.6029482466945	17.3259149235293	14.89322	16.75212	5	TPR	>tr|Q5SWX9|Q5SWX9_HUMAN Nucleoprotein TPR (Fragment) OS=Homo sapiens GN=TPR PE=1 SV=1	-1.8589	15.8226699065977	2.46051632200878	0.0245870225735061	0.212609377664323	-3.49921216734113	9	9	+	-	+
>tr|C9JZA7|C9JZA7_HUMAN Protein SSUH2 homolog (Fragment) OS=Homo sapiens GN=SSUH2 PE=4 SV=1	12.6955218954773	16.2573425531928	13.1707845469479	12.6955218954773	12.6955218954773	12.6955218954773	18.3131011386601	18.0294324837029	17.5895327333251	13.8934263595905	15.4958678444247	17.4788190037356	18.9059456064055	18.2111362951217	18.5212546134753	17.7635017968728	17.4574036714968	17.918600018919	14.9047	17.294	11	SSUH2	>tr|C9JZA7|C9JZA7_HUMAN Protein SSUH2 homolog (Fragment) OS=Homo sapiens GN=SSUH2 PE=4 SV=1	-2.3893	16.09934645821	2.46034197841568	0.0245958152011836	0.212609377664323	-3.49952613638794	9	9	+	-	-
>sp|P63218|GBG5_HUMAN Guanine nucleotide-binding protein G(I)/G(S)/G(O) subunit gamma-5 OS=Homo sapiens GN=GNG5 PE=1 SV=3	23.8869924523447	23.7050757113517	23.4257922647943	23.469891880733	22.8154094433334	22.856719251831	23.4123503391507	23.0109485361402	23.1765705822366	23.0183241095643	23.0958530931401	22.8499819935276	23.1743140666814	22.1633389226642	22.4346112633181	21.7716899005897	23.2693823628277	23.0938587800724	23.30664	22.76348	3	GNG5	>sp|P63218|GBG5_HUMAN Guanine nucleotide-binding protein G(I)/G(S)/G(O) subunit gamma-5 OS=Homo sapiens GN=GNG5 PE=1 SV=3	0.543155	23.0350613863501	-2.45861377828003	0.0246831333379752	0.212699943509323	-3.50263784806708	9	9	-	+	-
>tr|F5H3K7|F5H3K7_HUMAN Ras-related protein Rab-6A (Fragment) OS=Homo sapiens GN=RAB6A PE=1 SV=1	23.0588344425941	22.1070075002699	22.1209517392533	22.8612916073448	22.8970297523988	22.226640871108	21.1748575390318	21.1145730565267	21.2572844755538	20.5693733761983	19.3188243439334	21.4350502839657	20.3159822918623	22.331380983174	22.6404355486342	21.1011573027402	20.7805137855821	21.1731803870775	22.09094	21.07399	4	RAB6A	>tr|F5H3K7|F5H3K7_HUMAN Ras-related protein Rab-6A (Fragment) OS=Homo sapiens GN=RAB6A PE=1 SV=1	1.01695	21.5824649604027	-2.45776463247657	0.0247261436657742	0.212699943509323	-3.50416641744277	9	9	-	+	-
>sp|Q13555|KCC2G_HUMAN Calcium/calmodulin-dependent protein kinase type II subunit gamma OS=Homo sapiens GN=CAMK2G PE=1 SV=3	18.9044855051828	18.3533132557982	18.8643041570171	17.4096113056775	17.3944089278065	17.8956658735008	18.647854092617	19.619946968502	19.0197836332492	20.6874588938243	18.7361872835667	18.6484314831169	18.9367863744803	19.797805217481	18.4894243325999	19.2550642059597	19.8391822735828	19.2890097117531	18.4566	19.29771	25	CAMK2G	>sp|Q13555|KCC2G_HUMAN Calcium/calmodulin-dependent protein kinase type II subunit gamma OS=Homo sapiens GN=CAMK2G PE=1 SV=3	-0.841108	18.8771513053175	2.4575378451033	0.0247376426683342	0.212699943509323	-3.50457462303685	9	9	-	+	-
>tr|F2Z2E2|F2Z2E2_HUMAN Ras GTPase-activating-like protein IQGAP3 OS=Homo sapiens GN=IQGAP3 PE=1 SV=1	16.1879846794563	16.3300900807927	17.1710208909949	15.3010442715998	15.6011464585177	15.5187595214562	18.156224150041	17.9290757443174	17.7354067238227	14.7167326930112	13.377688785951	16.6323958140849	14.8231294351734	14.6538899780963	16.011661394332	17.6125671110618	14.9160888548068	15.2426404791394	16.65897	15.33187	82	IQGAP3	>tr|F2Z2E2|F2Z2E2_HUMAN Ras GTPase-activating-like protein IQGAP3 OS=Homo sapiens GN=IQGAP3 PE=1 SV=1	1.32711	15.9954192814809	-2.45627548164253	0.024801741444569	0.212840172056179	-3.5068465020465	9	9	+	-	-
>tr|U3KQD2|U3KQD2_HUMAN Protein GPR107 OS=Homo sapiens GN=GPR107 PE=1 SV=1	14.9666686221999	13.218773329393	15.0264885025706	18.6125196030824	18.8491701830578	14.757439590681	14.0105982047256	15.0135099459708	14.1855175234237	16.2476083979749	17.2552420185028	15.2759636929432	18.2505311173983	16.910966827553	17.8176474825691	18.1980018401384	18.0199732048431	16.4824646477058	15.40452	17.16204	7	GPR107	>tr|U3KQD2|U3KQD2_HUMAN Protein GPR107 OS=Homo sapiens GN=GPR107 PE=1 SV=1	-1.75752	16.283282485263	2.45472051717739	0.0248809124215723	0.212840172056179	-3.50964425223835	9	9	-	-	-
>tr|E7EW33|E7EW33_HUMAN Cytoplasmic FMR1-interacting protein 2 OS=Homo sapiens GN=CYFIP2 PE=1 SV=1	18.6726247583567	18.9006608460635	18.8238111868664	18.1356008419286	19.6067666806526	18.4806999975536	18.8506780132489	19.1292338906579	18.8232283462626	18.7304841618082	18.873060029819	20.050673172612	20.1218569057023	20.2493866404251	20.3992092607943	19.1387510934181	19.1807834225228	18.6952819234313	18.82481	19.49328	54	CYFIP2	>tr|E7EW33|E7EW33_HUMAN Cytoplasmic FMR1-interacting protein 2 OS=Homo sapiens GN=CYFIP2 PE=1 SV=1	-0.668465	19.1590439540069	2.45463274190179	0.0248853885812906	0.212840172056179	-3.50980215695437	9	9	+	+	-
>tr|J3KPM9|J3KPM9_HUMAN Signal transducer and activator of transcription OS=Homo sapiens GN=STAT1 PE=1 SV=1	18.9614144410221	19.3799664547509	19.280073852317	20.1114846421363	20.1257564363028	20.0027437571149	19.045462137064	19.1135188733238	19.0749744872857	19.1168762515708	19.0204158110883	18.8424851863697	19.0915535686774	18.5542894605089	18.8107340155836	19.2148357750536	19.1312643984495	19.1308245342891	19.45504	18.99036	38	STAT1	>tr|J3KPM9|J3KPM9_HUMAN Signal transducer and activator of transcription OS=Homo sapiens GN=STAT1 PE=1 SV=1	0.46468	19.2227041157171	-2.45331786214513	0.0249525325275237	0.212944852623748	-3.51216727538779	9	9	+	-	+
>sp|Q9UKK6|NXT1_HUMAN NTF2-related export protein 1 OS=Homo sapiens GN=NXT1 PE=1 SV=1	12.6955218954773	12.6955218954773	12.6955218954773	12.6955218954773	12.6955218954773	12.6955218954773	12.6955218954773	12.6955218954773	12.6955218954773	12.6955218954773	12.6955218954773	12.6955218954773	20.5734645519641	19.1654011441714	20.9116782814023	12.6955218954773	16.1229683574849	12.6955218954773	12.69552	15.58346	5	NXT1	>sp|Q9UKK6|NXT1_HUMAN NTF2-related export protein 1 OS=Homo sapiens GN=NXT1 PE=1 SV=1	-2.88794	14.1394899373169	2.45267747119301	0.0249852955939761	0.212944852623748	-3.5133189607604	9	9	+	-	-
>tr|S4R2X6|S4R2X6_HUMAN Serine/arginine-rich-splicing factor 4 OS=Homo sapiens GN=SRSF4 PE=1 SV=1	18.7438455119938	17.5550009886603	19.1210985134158	18.5244424207577	18.8078952652692	19.2596817972764	19.1735595315601	20.3147824657227	17.3549253320279	18.4328697291207	18.9213743147404	19.0427524407289	20.2012279281489	19.7102301842056	20.2169066475125	19.7916898441248	20.2038713688402	21.143836696095	18.76169	19.74053	6	SRSF4	>tr|S4R2X6|S4R2X6_HUMAN Serine/arginine-rich-splicing factor 4 OS=Homo sapiens GN=SRSF4 PE=1 SV=1	-0.978836	19.2511106100112	2.45032252781963	0.0251061253449608	0.213599924563607	-3.51755294420809	9	9	-	-	+
>tr|B0QZ43|B0QZ43_HUMAN Erlin-1 (Fragment) OS=Homo sapiens GN=ERLIN1 PE=1 SV=1	20.7778884734105	20.2398565544235	20.651057313447	20.4900944412334	20.8679869332056	20.5434122325253	20.1348683945385	19.9643784123361	20.2899671837212	19.7224037421	20.0442481986195	19.629303610798	19.8849563627135	20.5847985364324	20.3044189799722	19.8643958431486	19.8144735330822	20.4282029509307	20.43995	20.0308	13	ERLIN1	>tr|B0QZ43|B0QZ43_HUMAN Erlin-1 (Fragment) OS=Homo sapiens GN=ERLIN1 PE=1 SV=1	0.409145	20.2353728720355	-2.44771506007675	0.0252405530269132	0.214368193364938	-3.52223879473312	9	9	-	-	-
>sp|P41567|EIF1_HUMAN Eukaryotic translation initiation factor 1 OS=Homo sapiens GN=EIF1 PE=1 SV=1	17.3156442090967	18.1467622259789	18.1746874909362	19.7623345044019	20.0257345318813	19.6103909347608	20.4931304996173	20.035303172893	20.6471425036404	19.2892606079103	21.5117058143829	20.8751522523621	21.0934209359401	21.4740785688648	21.8422213177806	19.6825735131264	19.8713223556594	19.5176520733206	19.35679	20.57304	5	EIF1	>sp|P41567|EIF1_HUMAN Eukaryotic translation initiation factor 1 OS=Homo sapiens GN=EIF1 PE=1 SV=1	-1.21625	19.9649176395863	2.44507823854067	0.0253771822544444	0.21506956350222	-3.52697509349616	9	9	+	-	-
>tr|A0A0A0MQX7|A0A0A0MQX7_HUMAN Testican-1 OS=Homo sapiens GN=SPOCK1 PE=1 SV=1	13.0066394085968	12.2752928635774	12.3376403891209	14.2372207703038	15.280083739142	15.4212567846832	12.5739233393347	12.6955218954773	13.8733419612615	12.6955218954773	12.6955218954773	11.4988714277454	12.7215862908649	12.6955218954773	12.6955218954773	12.6955218954773	11.8991431700226	12.6955218954773	13.52232	12.47697	20	SPOCK1	>tr|A0A0A0MQX7|A0A0A0MQX7_HUMAN Testican-1 OS=Homo sapiens GN=SPOCK1 PE=1 SV=1	1.04535	12.999647411833	-2.44438375681101	0.0254132829715196	0.21506956350222	-3.52822214602938	9	9	+	-	-
>sp|Q9Y5V0|ZN706_HUMAN Zinc finger protein 706 OS=Homo sapiens GN=ZNF706 PE=1 SV=1	17.7101062213811	17.5465261439534	17.0218249470442	12.6955218954773	12.6955218954773	18.0938858817826	18.9694710417339	18.8527782992659	16.8135128831718	19.3181716829739	19.4250288924445	18.1138551809652	18.7403825139834	17.2717345269335	18.0975976632625	19.0979830316881	19.0095871167303	18.911005834753	16.71102	18.66504	2	ZNF706	>sp|Q9Y5V0|ZN706_HUMAN Zinc finger protein 706 OS=Homo sapiens GN=ZNF706 PE=1 SV=1	-1.95402	17.688027536279	2.44275631250752	0.0254980704229346	0.21506956350222	-3.53114384983966	9	9	-	-	-
>tr|Q5QPD2|Q5QPD2_HUMAN Aurora kinase A (Fragment) OS=Homo sapiens GN=AURKA PE=1 SV=7	12.6955218954773	12.6955218954773	12.6955218954773	12.6955218954773	12.6955218954773	12.6955218954773	12.6955218954773	12.6955218954773	12.6955218954773	12.6955218954773	14.5449343342914	12.6955218954773	12.7215862908649	12.6955218954773	12.6955218954773	14.5741778655312	14.6108332341683	15.9502115406269	12.69552	13.68709	8	AURKA	>tr|Q5QPD2|Q5QPD2_HUMAN Aurora kinase A (Fragment) OS=Homo sapiens GN=AURKA PE=1 SV=7	-0.99157	13.1913071059271	2.44196445923729	0.0255394209265987	0.21506956350222	-3.5325651206575	9	9	-	-	+
>tr|G3XAK4|G3XAK4_HUMAN Paraoxonase 2, isoform CRA_c OS=Homo sapiens GN=PON2 PE=1 SV=1	15.049800334393	12.6955218954773	12.6955218954773	12.6955218954773	12.6955218954773	12.6955218954773	15.1137091143269	15.1821235258209	15.3962124839236	15.7610236775506	16.8864187977377	12.6955218954773	16.616158490518	14.7846853599422	14.9597842477428	15.0609480391196	15.5509213474087	14.6762614045428	13.80216	15.2213	8	PON2	>tr|G3XAK4|G3XAK4_HUMAN Paraoxonase 2, isoform CRA_c OS=Homo sapiens GN=PON2 PE=1 SV=1	-1.41914	14.5117321219939	2.44136000511719	0.0255710278824992	0.21506956350222	-3.5336498936944	9	9	-	-	+
>tr|H3BQZ7|H3BQZ7_HUMAN HCG2044799 OS=Homo sapiens GN=HNRNPUL2-BSCL2 PE=4 SV=1	20.0917600471981	19.7645572006077	19.7533764185676	19.389820436451	19.5245354692686	19.3399254958034	20.7272533201878	20.7689589468295	20.5862427993002	20.8001888570803	20.0406330766215	20.4423604852524	21.0694651199168	20.2175167807959	20.1212861018864	20.7823102539018	20.902360629934	20.7042825626017	19.99405	20.56449	32	HNRNPUL2-BSCL2	>tr|H3BQZ7|H3BQZ7_HUMAN HCG2044799 OS=Homo sapiens GN=HNRNPUL2-BSCL2 PE=4 SV=1	-0.570442	20.279268555678	2.44082235987001	0.025599172292118	0.21506956350222	-3.53461466645534	9	9	-	-	-
>sp|P17026|ZNF22_HUMAN Zinc finger protein 22 OS=Homo sapiens GN=ZNF22 PE=1 SV=3	14.067391131042	13.2216961235331	12.7702698564363	12.6955218954773	12.6955218954773	12.6955218954773	15.9368032569538	14.1636419545312	16.447349739661	14.8219922272626	13.6874457169723	15.2513214999096	16.0611179016347	16.4312201924899	16.2856594928163	14.1537455057513	14.8880392504209	15.3771641485285	13.85486	15.21752	11	ZNF22	>sp|P17026|ZNF22_HUMAN Zinc finger protein 22 OS=Homo sapiens GN=ZNF22 PE=1 SV=3	-1.36267	14.5361902046875	2.43952792406647	0.0256670523186032	0.21506956350222	-3.53693705762335	9	9	-	-	+
>tr|F8VQS9|F8VQS9_HUMAN RNA-binding motif, single-stranded-interacting protein 2 OS=Homo sapiens GN=RBMS2 PE=1 SV=1	17.7961760543078	18.2080580482098	17.2399417523712	16.3133777074797	16.9460424995285	16.7738150791887	18.0942708895492	17.6406188035123	17.862595522866	18.315927414436	17.1512521685254	18.8330641155389	19.8491534432076	18.9270051017379	17.1948050970319	18.1964548960003	18.2861170243051	17.8560709640557	17.43054	18.28998	4	RBMS2	>tr|F8VQS9|F8VQS9_HUMAN RNA-binding motif, single-stranded-interacting protein 2 OS=Homo sapiens GN=RBMS2 PE=1 SV=1	-0.859439	17.8602636989918	2.43725394345448	0.0257867093455025	0.21506956350222	-3.54101552069722	9	9	-	-	+
>tr|B8QGS9|B8QGS9_HUMAN Plakophilin-2 OS=Homo sapiens GN=PKP2 PE=1 SV=1	16.92978791626	16.4007636956301	16.4128510400786	15.7599912741201	16.2088593935116	14.7561421891155	16.025664519641	15.9423030350184	15.9902762625489	17.5733514493397	16.7798978057723	15.9752273972423	17.1968372618286	16.8524443122278	17.0095200950905	16.2411617769763	17.0021864058121	15.8751721720332	16.0474	16.72287	46	PKP2	>tr|B8QGS9|B8QGS9_HUMAN Plakophilin-2 OS=Homo sapiens GN=PKP2 PE=1 SV=1	-0.675462	16.3851354445693	2.43597561158015	0.0258542052398754	0.21506956350222	-3.54330748948426	9	9	-	-	+
>sp|Q00537|CDK17_HUMAN Cyclin-dependent kinase 17 OS=Homo sapiens GN=CDK17 PE=1 SV=2	17.3196904207575	17.6224102139663	17.7478435280141	18.4415146026332	18.1851260093213	18.430795474136	17.8842466548258	18.0763273876695	17.7950777100031	17.5128846264342	16.1524263622919	17.3837012692696	17.0841943749445	16.4320821627183	18.2724530001552	17.8366715226909	17.5242452746756	17.636084974484	17.94478	17.31497	26	CDK17	>sp|Q00537|CDK17_HUMAN Cyclin-dependent kinase 17 OS=Homo sapiens GN=CDK17 PE=1 SV=2	0.62981	17.6298764204995	-2.43526455418933	0.0258918208693103	0.21506956350222	-3.54458213249894	9	9	-	-	-
>tr|C9J3R0|C9J3R0_HUMAN Regulator of chromosome condensation (Fragment) OS=Homo sapiens GN=RCC1 PE=1 SV=6	12.6955218954773	12.690996670966	12.6955218954773	12.6955218954773	12.6955218954773	12.6955218954773	12.6955218954773	16.3739078903079	12.6955218954773	16.5995250936071	16.6243213174659	12.6955218954773	12.7215862908649	12.6955218954773	12.6955218954773	17.6667442046724	17.6554744876341	17.8483595982075	13.10373	15.24473	13	RCC1	>tr|C9J3R0|C9J3R0_HUMAN Regulator of chromosome condensation (Fragment) OS=Homo sapiens GN=RCC1 PE=1 SV=6	-2.141	14.1742296949166	2.43399438411436	0.0259591421017254	0.21506956350222	-3.54685861784829	9	9	+	-	+
>sp|Q6ZUS5|CC121_HUMAN Coiled-coil domain-containing protein 121 OS=Homo sapiens GN=CCDC121 PE=1 SV=1	17.3086027232682	18.9484676762299	19.1471541382037	18.2423068707566	18.2437816397972	18.39616442645	19.0370012922611	19.2939876396202	19.0381609193506	19.5723097964195	18.0413932851635	19.1663680300573	20.2169066475125	19.2256170809314	19.6825735131264	19.5048787367506	19.3556333956625	19.2055069910731	18.6284	19.33013	16	CCDC121	>sp|Q6ZUS5|CC121_HUMAN Coiled-coil domain-containing protein 121 OS=Homo sapiens GN=CCDC121 PE=1 SV=1	-0.701729	18.9792674890352	2.43349122669605	0.0259858557715647	0.21506956350222	-3.54776026030361	9	9	-	-	-
>tr|A0A0A0MR54|A0A0A0MR54_HUMAN Scavenger receptor class F member 1 OS=Homo sapiens GN=SCARF1 PE=1 SV=1	13.5500371044865	12.9172074052958	12.9614646657079	14.9534374604738	14.8958509253879	14.5187419667081	12.6955218954773	12.6955218954773	12.6955218954773	12.6955218954773	12.6955218954773	13.5350980738745	12.7215862908649	12.6955218954773	12.6955218954773	12.6955218954773	11.5287321208352	12.6955218954773	13.54259	12.66206	32	SCARF1	>tr|A0A0A0MR54|A0A0A0MR54_HUMAN Scavenger receptor class F member 1 OS=Homo sapiens GN=SCARF1 PE=1 SV=1	0.880529	13.1023251707184	-2.43211952594121	0.0260588134359619	0.21506956350222	-3.55021787105529	9	9	-	-	-
>sp|A6NHG4|DDTL_HUMAN D-dopachrome decarboxylase-like protein OS=Homo sapiens GN=DDTL PE=2 SV=1	16.670030966629	17.4104620240601	16.8955588494154	18.6578091004227	18.487446089294	18.7000986918979	12.6955218954773	17.6901080880699	12.6955218954773	17.1208384561539	17.5244951041054	16.48664582805	12.7215862908649	12.6955218954773	12.6955218954773	12.6955218954773	12.6955218954773	12.6955218954773	16.65584	14.14791	8	DDTL	>sp|A6NHG4|DDTL_HUMAN D-dopachrome decarboxylase-like protein OS=Homo sapiens GN=DDTL PE=2 SV=1	2.50793	15.4018740420725	-2.43049329402899	0.0261455583121012	0.21506956350222	-3.55313068876109	9	9	+	-	-
>tr|B5MC82|B5MC82_HUMAN D-dopachrome decarboxylase OS=Homo sapiens GN=DDT PE=4 SV=2	16.670030966629	17.4104620240601	16.8955588494154	18.6578091004227	18.487446089294	18.7000986918979	12.6955218954773	17.6901080880699	12.6955218954773	17.1208384561539	17.5244951041054	16.48664582805	12.7215862908649	12.6955218954773	12.6955218954773	12.6955218954773	12.6955218954773	12.6955218954773	16.65584	14.14791	8	DDT	>tr|B5MC82|B5MC82_HUMAN D-dopachrome decarboxylase OS=Homo sapiens GN=DDT PE=4 SV=2	2.50793	15.4018740420725	-2.43049329402899	0.0261455583121012	0.21506956350222	-3.55313068876109	9	9	+	-	-
>tr|H3BN59|H3BN59_HUMAN Uncharacterized protein (Fragment) OS=Homo sapiens PE=1 SV=1	16.5222233463859	17.3687967632339	16.3803041148272	10.7740586060448	10.8780683771903	10.4200507814349	17.9936758268836	18.0489281162492	18.2200940656894	19.0036344942497	17.3859686234026	17.3458359750355	18.4049902521717	15.0325444116622	18.1170705892758	19.045462137064	18.9436011624032	19.0356120637326	15.17847	18.03497	11	>tr|H3BN59|H3BN59_HUMAN Uncharacterized protein (Fragment) OS=Homo sapiens PE=1 SV=1	>tr|H3BN59|H3BN59_HUMAN Uncharacterized protein (Fragment) OS=Homo sapiens PE=1 SV=1	-2.8565	16.6067177614965	2.42903284206155	0.026223691395348	0.21506956350222	-3.55574580715617	9	9	-	-	-
>sp|O75844|FACE1_HUMAN CAAX prenyl protease 1 homolog OS=Homo sapiens GN=ZMPSTE24 PE=1 SV=2	18.2494196382426	20.1052229034227	18.8132749839795	19.4982224601655	19.3438713927679	19.5102734964818	17.1219673810995	18.3550064629043	18.4866547623349	19.4091296739001	17.4179396194943	18.671606278251	17.6443397360397	17.6689697885473	18.0810160878788	17.163947415646	18.0474264281119	16.922169062397	18.83155	17.89184	22	ZMPSTE24	>sp|O75844|FACE1_HUMAN CAAX prenyl protease 1 homolog OS=Homo sapiens GN=ZMPSTE24 PE=1 SV=2	0.939708	18.3616920873147	-2.42868494646772	0.0262423358604009	0.21506956350222	-3.556368650246	9	9	-	+	-
>tr|G5E9W8|G5E9W8_HUMAN Glycogenin 1, isoform CRA_e OS=Homo sapiens GN=GYG1 PE=1 SV=1	22.2037051462781	22.583104448852	22.597878711407	22.9932410918689	22.4259016189227	22.5532559737402	23.1831197671991	23.2480613903492	23.3816801542051	22.9458610400706	23.1322861274467	22.8945845643984	23.6823098990713	23.7298055500808	23.6512260483306	23.3920162917596	23.1951024507869	22.7969623829896	22.79666	23.26891	10	GYG1	>tr|G5E9W8|G5E9W8_HUMAN Glycogenin 1, isoform CRA_e OS=Homo sapiens GN=GYG1 PE=1 SV=1	-0.472245	23.0327834809865	2.42829753847252	0.0262631125283403	0.21506956350222	-3.55706218470211	9	9	-	+	-
>sp|Q8TED1|GPX8_HUMAN Probable glutathione peroxidase 8 OS=Homo sapiens GN=GPX8 PE=1 SV=2	17.8316292756003	18.4297328108053	19.3147169508782	18.3528801257748	18.0815505357668	18.5019174878207	17.5192274589064	17.9005511500518	18.5108277672755	18.0767751132779	18.0501167317752	18.5537476733325	17.3846300091319	16.2582418812209	16.6553091742063	18.5096797862623	16.9639518582864	16.7612979069151	18.27145	17.46819	9	GPX8	>sp|Q8TED1|GPX8_HUMAN Probable glutathione peroxidase 8 OS=Homo sapiens GN=GPX8 PE=1 SV=2	0.803254	17.869821316516	-2.42752001540824	0.0263048576640415	0.21506956350222	-3.55845394607102	9	9	-	-	-
>sp|O43432|IF4G3_HUMAN Eukaryotic translation initiation factor 4 gamma 3 OS=Homo sapiens GN=EIF4G3 PE=1 SV=2	18.437385841915	18.5810837003849	18.7655339820199	17.8493625433392	17.496397208822	17.3329909362884	18.9236483618324	18.7572038585858	18.9484676762299	18.7265218689878	18.9980427233043	18.1905679905983	19.9880041454307	18.0829908900919	19.6724037399546	19.3497461993194	19.2358717062803	19.3334335892047	18.34356	19.06418	76	EIF4G3	>sp|O43432|IF4G3_HUMAN Eukaryotic translation initiation factor 4 gamma 3 OS=Homo sapiens GN=EIF4G3 PE=1 SV=2	-0.720612	18.703869831255	2.42662861743953	0.0263527933927277	0.21506956350222	-3.56004929014867	9	9	-	-	-
>tr|A0A0G2JJD3|A0A0G2JJD3_HUMAN Abhydrolase domain-containing protein 16A OS=Homo sapiens GN=ABHD16A PE=1 SV=1	15.5792989822164	15.3314471676008	15.4382001641379	15.4053993485292	15.5138690668153	15.7953880484114	13.3913116365897	13.1618884498392	13.377688785951	14.3335715846342	12.9400024244236	14.5593831171402	15.2073023660368	14.5425368243629	12.6955218954773	12.6619909578543	12.905925064748	11.9150132913592	14.77717	13.52903	29	ABHD16A	>tr|A0A0G2JJD3|A0A0G2JJD3_HUMAN Abhydrolase domain-containing protein 16A OS=Homo sapiens GN=ABHD16A PE=1 SV=1	1.24814	14.153096620896	-2.42583553868519	0.0263955108549598	0.21506956350222	-3.5614684442642	9	9	-	-	-
>tr|Q5W0S4|Q5W0S4_HUMAN UV excision repair protein RAD23 homolog B (Fragment) OS=Homo sapiens GN=RAD23B PE=1 SV=1	19.7155907075564	19.1228097189894	18.8066836682042	18.8681811241431	19.4804811476205	19.6012394455955	19.331020744393	18.1970565803886	19.3672978554631	18.5399386565512	19.835390181268	19.543033054047	21.1630729929614	20.5242540275984	20.5461717247563	20.0946096002083	19.6237620972356	19.2701503725026	19.1656	19.90449	4	RAD23B	>tr|Q5W0S4|Q5W0S4_HUMAN UV excision repair protein RAD23 homolog B (Fragment) OS=Homo sapiens GN=RAD23B PE=1 SV=1	-0.738891	19.5350413166379	2.42579553184415	0.0263976674580248	0.21506956350222	-3.56154002779582	9	9	+	-	+
>sp|Q7L7X3|TAOK1_HUMAN Serine/threonine-protein kinase TAO1 OS=Homo sapiens GN=TAOK1 PE=1 SV=1	19.1053899191469	18.3995152715175	17.3294316623403	17.8842466548258	17.7273305052282	17.4118372911044	17.8822359693151	18.5434543098577	17.9694232679127	17.3976331751302	17.6758765676408	17.0413653113222	16.9817079388613	17.3176997465455	16.5038469450095	17.8621935591101	18.1442325307369	17.7146653320521	18.0281	17.40436	41	TAOK1	>sp|Q7L7X3|TAOK1_HUMAN Serine/threonine-protein kinase TAO1 OS=Homo sapiens GN=TAOK1 PE=1 SV=1	0.623738	17.7162269976476	-2.42518275728878	0.0264307202748643	0.21506956350222	-3.56263638639221	9	9	-	-	-
>tr|A6NMS2|A6NMS2_HUMAN Ribose-phosphate pyrophosphokinase 2 (Fragment) OS=Homo sapiens GN=PRPS2 PE=1 SV=2	12.6955218954773	12.6955218954773	12.6955218954773	15.5822279381563	16.0922654476149	15.6435607897409	14.663260372423	16.8033322880959	17.0856557910744	18.7108763628763	18.9986655099079	14.893929421054	16.495704950695	15.9775199496775	16.0505165388964	17.2653008891692	14.8017750154174	17.0508142112837	14.8841	16.6939	6	PRPS2	>tr|A6NMS2|A6NMS2_HUMAN Ribose-phosphate pyrophosphokinase 2 (Fragment) OS=Homo sapiens GN=PRPS2 PE=1 SV=2	-1.8098	15.7889983979175	2.42512105566039	0.0264340505885662	0.21506956350222	-3.56274677408774	9	9	-	-	-
>tr|Q5T7U4|Q5T7U4_HUMAN General transcription factor 3C polypeptide 5 (Fragment) OS=Homo sapiens GN=GTF3C5 PE=1 SV=1	17.6947726087244	16.2072302296933	16.7009282423914	18.7766347328602	18.8945671916618	18.9290687659041	16.3399390337314	16.0080031201282	16.2985896154318	16.2229139543967	17.1004401559866	16.8692061631992	16.1612545864438	15.726879745186	15.2317067505656	16.5091351501281	15.9316885457748	16.2919347718706	17.31664	16.22724	16	GTF3C5	>tr|Q5T7U4|Q5T7U4_HUMAN General transcription factor 3C polypeptide 5 (Fragment) OS=Homo sapiens GN=GTF3C5 PE=1 SV=1	1.0894	16.7719385202265	-2.42417684415326	0.0264850630864217	0.21506956350222	-3.56443586005073	9	9	-	-	-
>tr|A0A087WTD5|A0A087WTD5_HUMAN Nodal modulator 2 OS=Homo sapiens GN=NOMO2 PE=4 SV=1	19.2748851152793	18.630354159494	18.6206421662583	18.4597291030821	19.2073680587512	17.9853245828772	17.6548496812074	18.7802278781119	17.8322664323686	20.3722622060116	18.917257386037	19.197530818061	19.7358945721133	18.3657118308758	18.5652082706527	19.6034333643395	18.9760513208645	18.9114783923409	18.49396	19.18276	13	NOMO2	>tr|A0A087WTD5|A0A087WTD5_HUMAN Nodal modulator 2 OS=Homo sapiens GN=NOMO2 PE=4 SV=1	-0.688798	18.8383597410404	2.42342469596067	0.0265257651792486	0.21506956350222	-3.56578114943858	9	9	-	-	-
>tr|E9PHH9|E9PHH9_HUMAN DNA-directed RNA polymerase III subunit RPC3 OS=Homo sapiens GN=POLR3C PE=1 SV=1	12.6955218954773	12.6955218954773	12.6955218954773	12.6955218954773	12.6955218954773	12.6955218954773	13.6319643043036	14.187129899421	13.4563967784136	12.6955218954773	12.6955218954773	12.6955218954773	16.6243213174659	16.2601271941278	16.0550330728659	16.7497067536574	13.7994760745113	13.3256616441113	13.04985	14.54454	22	POLR3C	>tr|E9PHH9|E9PHH9_HUMAN DNA-directed RNA polymerase III subunit RPC3 OS=Homo sapiens GN=POLR3C PE=1 SV=1	-1.4947	13.7971952276763	2.4232378162293	0.0265358871778877	0.21506956350222	-3.56611537190022	9	9	-	-	+
>sp|Q14134|TRI29_HUMAN Tripartite motif-containing protein 29 OS=Homo sapiens GN=TRIM29 PE=1 SV=2	19.7533764185676	19.1924049920677	19.5723097964195	19.8323141499355	19.8504181650716	19.8767783611967	19.5695516605746	18.8846861554428	19.8782346689113	19.9665600675097	19.9843044954547	20.4305340597486	21.2781228060344	21.8959514016882	20.917441884968	18.9440426303923	20.4931304996173	19.5071983535667	19.60112	20.3797	33	TRIM29	>sp|Q14134|TRI29_HUMAN Tripartite motif-containing protein 29 OS=Homo sapiens GN=TRIM29 PE=1 SV=2	-0.778579	19.9904089203982	2.42274256436163	0.0265627291274871	0.21506956350222	-3.56700104061701	9	9	+	-	-
>tr|C9J126|C9J126_HUMAN Cadherin-2 (Fragment) OS=Homo sapiens GN=CDH2 PE=1 SV=1	21.6784548353435	21.2652474614193	21.4941839367681	20.5038748515778	20.8894026797581	20.5791634985802	21.4855423117547	20.0956691905729	21.0578899296662	17.72136339848	18.7673851750821	20.134168072459	20.6534620096788	19.3020742613357	20.0681969855729	21.0653078923419	21.2285479214785	20.914240440628	21.00549	19.98386	7	CDH2	>tr|C9J126|C9J126_HUMAN Cadherin-2 (Fragment) OS=Homo sapiens GN=CDH2 PE=1 SV=1	1.02163	20.4946763806943	-2.42134864317251	0.0266384145560672	0.21532349070445	-3.56949336808764	9	9	-	+	-
>tr|H3BV30|H3BV30_HUMAN AP-1 complex subunit gamma-1 (Fragment) OS=Homo sapiens GN=AP1G1 PE=1 SV=6	22.5131408363169	20.9530068992004	21.4677967138363	20.8060759393282	20.583090789435	20.5148147264542	21.0039396794612	21.2317614568023	21.5061017661834	20.8751522523621	20.0325743852267	21.596500366442	18.9149914595034	20.0716922734665	18.6110521185481	19.6781626026115	21.187623388026	21.043631564942	21.17553	20.22349	2	AP1G1	>tr|H3BV30|H3BV30_HUMAN AP-1 complex subunit gamma-1 (Fragment) OS=Homo sapiens GN=AP1G1 PE=1 SV=6	0.952039	20.6995060676748	-2.41991082857651	0.0267166952833958	0.215597517752055	-3.57206348132153	9	9	+	+	-
>tr|H0YH33|H0YH33_HUMAN Serine-threonine kinase receptor-associated protein (Fragment) OS=Homo sapiens GN=STRAP PE=1 SV=1	19.9967198504896	20.757041560777	18.6856821167882	18.5680878776283	18.7357845133976	19.1228097189894	20.9149764822058	20.6694253175513	20.807035525584	20.9288588400488	21.3333736016955	20.9362673205325	18.5480969902456	23.0288971059008	23.8616329048993	20.8177974390926	20.465311729454	21.1444819465518	19.8064	21.22941	6	STRAP	>tr|H0YH33|H0YH33_HUMAN Serine-threonine kinase receptor-associated protein (Fragment) OS=Homo sapiens GN=STRAP PE=1 SV=1	-1.42302	20.5179044912129	2.41644933951579	0.0269060397612406	0.216765408225716	-3.57824803743294	9	9	+	-	+
>sp|P27105|STOM_HUMAN Erythrocyte band 7 integral membrane protein OS=Homo sapiens GN=STOM PE=1 SV=3	23.071176098226	22.8499819935276	22.5358064166845	22.6906038165588	22.6528403123243	22.6562269495643	22.010531016517	22.0153562437778	21.5394897898411	22.2994375100178	22.080343990689	22.5375561244525	21.1911980464691	20.947845825762	22.264475458308	21.881833786788	22.1226243981153	20.9082522762531	22.44689	21.80373	13	STOM	>sp|P27105|STOM_HUMAN Erythrocyte band 7 integral membrane protein OS=Homo sapiens GN=STOM PE=1 SV=3	0.643161	22.1253100029931	-2.41546079759466	0.0269603439778036	0.216843296430745	-3.58001348621322	9	9	+	+	-
>tr|V9GY78|V9GY78_HUMAN Ribosome-binding protein 1 (Fragment) OS=Homo sapiens GN=RRBP1 PE=1 SV=1	20.6609575653117	20.2278610900417	20.4047184090281	19.2262917884665	19.3049101129744	19.0291932890621	20.2159926778021	20.1972056853525	19.9396245948916	19.6034333643395	19.4577779313476	20.0275927803391	17.9992839251043	17.1612617133434	16.9707759650955	18.2953563255651	19.9815005651723	20.0095221445494	19.91186	18.83406	12	RRBP1	>tr|V9GY78|V9GY78_HUMAN Ribosome-binding protein 1 (Fragment) OS=Homo sapiens GN=RRBP1 PE=1 SV=1	1.07781	19.3729588848771	-2.41456931839454	0.0270094043396792	0.216878820301093	-3.58160530161878	9	9	-	+	-
>tr|H7C597|H7C597_HUMAN Staphylococcal nuclease domain-containing protein 1 (Fragment) OS=Homo sapiens GN=SND1 PE=1 SV=1	21.9733405729552	21.9373031840967	22.0636278306167	22.0861197542509	21.9864200783826	21.9925973050744	21.8485514875303	22.2237822652515	21.6485017522987	21.9384334942876	21.5504041724379	22.0242933033682	19.2789914029367	21.5409347239347	20.4603848693064	21.6137537166903	21.4140158306951	21.5561804380792	21.97336	21.26415	10	SND1	>tr|H7C597|H7C597_HUMAN Staphylococcal nuclease domain-containing protein 1 (Fragment) OS=Homo sapiens GN=SND1 PE=1 SV=1	0.709206	21.6187575656774	-2.41220448322328	0.0271399532394304	0.217567479929295	-3.58582660055069	9	9	+	+	+
>sp|P13797|PLST_HUMAN Plastin-3 OS=Homo sapiens GN=PLS3 PE=1 SV=4	19.2337908553431	20.5348661792613	18.4906183942396	21.2341715074223	20.0211720929457	21.1866215556544	19.5545928412581	19.3846876277366	19.3987122726098	20.4931304996173	18.820645858072	18.5343250322385	17.5803241227097	20.3763082461262	17.5542711762449	18.517708575946	18.6596816948574	18.6930605566483	19.89325	18.80327	35	PLS3	>sp|P13797|PLST_HUMAN Plastin-3 OS=Homo sapiens GN=PLS3 PE=1 SV=4	1.08998	19.3482605049406	-2.40854846334687	0.0273429461801995	0.218833661521267	-3.59234890669935	9	9	+	-	-
>sp|Q96T88|UHRF1_HUMAN E3 ubiquitin-protein ligase UHRF1 OS=Homo sapiens GN=UHRF1 PE=1 SV=1	12.6955218954773	12.6955218954773	12.6955218954773	12.6955218954773	12.6955218954773	12.6955218954773	13.5858892218198	12.330143920064	13.0634124221672	12.8324055572224	12.7862593210283	12.7562574162221	14.9627353893881	12.5218313527948	14.3220354927666	14.2454156403185	13.7100418216689	13.6748697386678	12.79473	13.53465	36	UHRF1	>sp|Q96T88|UHRF1_HUMAN E3 ubiquitin-protein ligase UHRF1 OS=Homo sapiens GN=UHRF1 PE=1 SV=1	-0.739919	13.1646904814996	2.40261535639259	0.0276754017396699	0.221130101400191	-3.6029236705951	9	9	-	-	+
>tr|D6RIU4|D6RIU4_HUMAN Vesicular integral-membrane protein VIP36 (Fragment) OS=Homo sapiens GN=LMAN2 PE=1 SV=6	20.694054194656	20.9226821751952	20.9288588400488	21.80389948149	22.2170751259935	21.8416890400743	20.8813809241284	20.8949198154006	20.7829314712303	20.5687748991281	20.2474520999283	20.9356251285364	20.9347755492425	21.0553508642289	20.9724757072577	20.1860277564835	20.5461717247563	20.6654090994155	21.21861	20.67912	12	LMAN2	>tr|D6RIU4|D6RIU4_HUMAN Vesicular integral-membrane protein VIP36 (Fragment) OS=Homo sapiens GN=LMAN2 PE=1 SV=6	0.539492	20.9488641053997	-2.39957062874453	0.0278474771946667	0.221623819837557	-3.60834563591809	9	9	-	+	-
>sp|P07951|TPM2_HUMAN Tropomyosin beta chain OS=Homo sapiens GN=TPM2 PE=1 SV=1	22.7749452830025	21.6746870028558	22.8426182812797	22.6404355486342	22.7102003344563	23.0887757578833	21.7139929768166	22.5513833728324	22.554594061846	22.9756698399222	22.8426182812797	23.0623171866221	23.0905616439625	23.0752998228748	22.9014073925773	23.0327335820872	22.4570267550496	23.2421090084999	22.50574	22.96442	12	TPM2	>sp|P07951|TPM2_HUMAN Tropomyosin beta chain OS=Homo sapiens GN=TPM2 PE=1 SV=1	-0.458679	22.7350764518046	2.39920208308148	0.0278683737572364	0.221623819837557	-3.60900171247947	9	9	-	-	-
>sp|Q13724|MOGS_HUMAN Mannosyl-oligosaccharide glucosidase OS=Homo sapiens GN=MOGS PE=1 SV=5	18.7298762825344	19.0777150491085	20.6367043285159	19.429650330335	19.5250970642443	19.7676153965415	20.0756619273234	20.0689924087558	20.583090789435	21.311953473191	20.2866153454579	20.7375855637002	20.3243559608646	19.9462725727227	19.6918659537082	20.5428210002565	20.2737991718056	20.5621410513647	19.76604	20.4086	41	MOGS	>sp|Q13724|MOGS_HUMAN Mannosyl-oligosaccharide glucosidase OS=Homo sapiens GN=MOGS PE=1 SV=5	-0.642556	20.0873229816592	2.39830799853637	0.0279191294737942	0.221623819837557	-3.61059314437501	9	9	-	+	-
>sp|Q8WWI5|CTL1_HUMAN Choline transporter-like protein 1 OS=Homo sapiens GN=SLC44A1 PE=1 SV=1	12.6955218954773	11.13747680229	11.7967498348415	12.6955218954773	12.6955218954773	12.6955218954773	12.428041879584	11.4988714277454	13.4599496398284	15.1744087076625	15.8249757964823	12.7123860935074	12.7215862908649	12.6955218954773	12.6955218954773	13.0000842434543	12.6412137538939	13.5307874829395	12.3448	13.44405	31	SLC44A1	>sp|Q8WWI5|CTL1_HUMAN Choline transporter-like protein 1 OS=Homo sapiens GN=SLC44A1 PE=1 SV=1	-1.09926	12.894425740331	2.39829840947515	0.0279196742981854	0.221623819837557	-3.61061021097756	9	9	-	+	-
>sp|O60264|SMCA5_HUMAN SWI/SNF-related matrix-associated actin-dependent regulator of chromatin subfamily A member 5 OS=Homo sapiens GN=SMARCA5 PE=1 SV=1	18.1469192275214	17.5172026761254	18.3506795592543	17.7518436187248	17.7495219615532	17.9719255032919	19.4086065837186	18.035601152214	18.2407865445265	18.6639322046522	19.0824295333852	18.4353188022066	21.0568936679685	18.7502238327283	20.3365513214777	18.2251365214797	18.3008247141905	18.3807675386448	18.13034	19.02579	50	SMARCA5	>sp|O60264|SMCA5_HUMAN SWI/SNF-related matrix-associated actin-dependent regulator of chromatin subfamily A member 5 OS=Homo sapiens GN=SMARCA5 PE=1 SV=1	-0.895443	18.5780647202035	2.39694193515709	0.0279968459184931	0.221873862107732	-3.61302413908254	9	9	-	-	+
>sp|Q16658|FSCN1_HUMAN Fascin OS=Homo sapiens GN=FSCN1 PE=1 SV=3	20.1598349944228	21.3988265653503	20.5153793068327	20.0946096002083	21.5217210079639	21.6084192486162	21.065860371001	20.8100694324884	20.3840119799991	19.6012394455955	20.5883121577987	20.7901636763437	20.1017634619021	20.6291168427787	20.5223460049547	19.8666107009743	20.1856176203847	20.0804653770582	20.83986	20.26285	28	FSCN1	>sp|Q16658|FSCN1_HUMAN Fascin OS=Homo sapiens GN=FSCN1 PE=1 SV=3	0.577011	20.5513537663707	-2.39296240440839	0.0282244011357574	0.223133340025328	-3.62010223950672	9	9	+	-	-
>tr|A0A0J9YVY2|A0A0J9YVY2_HUMAN Ladinin-1 (Fragment) OS=Homo sapiens GN=LAD1 PE=1 SV=1	19.4571916732994	19.0401372871445	17.2668889148596	18.6726247583567	18.9394378687028	17.215896907739	18.1040037465266	16.3078578635659	17.3956469128856	16.2560387583088	17.6968339383436	17.9562459138765	12.7215862908649	16.8517340016196	15.4896046514939	15.568893253047	17.6404312122874	18.1578128642167	18.04441	16.48213	9	LAD1	>tr|A0A0J9YVY2|A0A0J9YVY2_HUMAN Ladinin-1 (Fragment) OS=Homo sapiens GN=LAD1 PE=1 SV=1	1.56228	17.2632703787299	-2.39252871994172	0.0282493042215113	0.223133340025328	-3.62087326689265	9	9	-	-	-
>sp|Q9HCE1|MOV10_HUMAN Putative helicase MOV-10 OS=Homo sapiens GN=MOV10 PE=1 SV=2	20.5354828777769	21.1984975604842	20.9149764822058	19.835390181268	20.1782895565949	20.1790907408361	21.2479218652835	20.7551143806902	20.7703881556019	20.9505260276722	21.1537878632834	21.5053168555729	20.4191133523161	21.4276905006048	21.496802246045	21.3394746125048	21.0023781028789	20.8497416616836	20.62391	21.1272	49	MOV10	>sp|Q9HCE1|MOV10_HUMAN Putative helicase MOV-10 OS=Homo sapiens GN=MOV10 PE=1 SV=2	-0.503298	20.8755546124057	2.3917588108968	0.0282935647294364	0.223133340025328	-3.62224188958928	9	9	-	-	-
>tr|A0A0C4DGP4|A0A0C4DGP4_HUMAN Glucosidase 2 subunit beta (Fragment) OS=Homo sapiens GN=PRKCSH PE=1 SV=1	21.3865806456073	20.5734645519641	20.6556114131251	21.0309366368338	20.9312813226225	21.8427533991771	19.3464450667352	20.1732031056706	19.4454891222466	20.01256884843	19.9827629758228	21.1404629688159	19.3404713874435	19.9281978680156	18.4806999975536	19.4073140054146	19.3834392405043	19.9257772469602	20.59842	19.73352	7	PRKCSH	>tr|A0A0C4DGP4|A0A0C4DGP4_HUMAN Glucosidase 2 subunit beta (Fragment) OS=Homo sapiens GN=PRKCSH PE=1 SV=1	0.864897	20.1659699890524	-2.3909015234339	0.0283429248430839	0.223160338553812	-3.62376559477519	9	9	-	-	-
>tr|E9PQL0|E9PQL0_HUMAN Transmembrane protein 135 OS=Homo sapiens GN=TMEM135 PE=1 SV=1	20.8985672432964	20.3975244932092	20.3414057675128	21.4227020127115	21.3597589705087	21.4744206470925	21.5876698415038	21.4248879993708	21.5994269727368	20.3735544079256	19.7836853838874	20.1542875073968	20.1098719386139	21.2431794954393	19.4939673563361	20.9760021147678	21.2455803977768	21.1348995874699	21.16737	20.50167	19	TMEM135	>tr|E9PQL0|E9PQL0_HUMAN Transmembrane protein 135 OS=Homo sapiens GN=TMEM135 PE=1 SV=1	0.665704	20.8345217854198	-2.3892342200344	0.028439154268728	0.223419579469605	-3.62672824658824	9	9	-	-	-
>sp|O15066|KIF3B_HUMAN Kinesin-like protein KIF3B OS=Homo sapiens GN=KIF3B PE=1 SV=1	18.8742517035193	16.2973656460196	18.2886964121216	18.2484820372823	18.4117779731529	18.5492224312385	17.5107904341672	17.5301668575116	17.4347460470468	15.2014352222824	13.2386620241107	16.2763323306041	18.6644440264857	18.1082738480668	17.6236171219923	16.247028651119	16.5191007892142	16.7497067536574	17.90506	16.51429	37	KIF3B	>sp|O15066|KIF3B_HUMAN Kinesin-like protein KIF3B OS=Homo sapiens GN=KIF3B PE=1 SV=1	1.39077	17.2096722394218	-2.38873839050544	0.0284678303194083	0.223419579469605	-3.62760910335576	9	9	-	+	-
>sp|Q8IUC4|RHPN2_HUMAN Rhophilin-2 OS=Homo sapiens GN=RHPN2 PE=1 SV=1	15.0717064200272	17.9311166591838	14.5523458766748	14.1537455057513	13.7625013412579	12.3573226201475	15.6653138218027	15.3405873378371	15.3230569797374	16.9342371256432	19.3399254958034	15.6526714634516	17.6276325991982	17.2615333887912	16.9968836244803	13.0958678139924	17.9278216320939	15.5021260563477	14.90641	16.7043	37	RHPN2	>sp|Q8IUC4|RHPN2_HUMAN Rhophilin-2 OS=Homo sapiens GN=RHPN2 PE=1 SV=1	-1.79789	15.8053553201234	2.38640168388205	0.0286033372738216	0.22412098786488	-3.63175916955584	9	9	+	-	+
>tr|U3KQT3|U3KQT3_HUMAN Luc7-like protein 3 (Fragment) OS=Homo sapiens GN=LUC7L3 PE=1 SV=6	19.8450059713922	20.1642605191885	20.1103346753958	21.4113814888573	20.5434122325253	20.5958750039849	19.9784114555459	20.160782339906	20.366602543477	18.3196645237475	17.8502917526298	20.029486484061	19.8520472405941	19.835390181268	19.5408963793096	20.6577577894049	20.076350319392	19.8613798192997	20.3529	19.55814	2	LUC7L3	>tr|U3KQT3|U3KQT3_HUMAN Luc7-like protein 3 (Fragment) OS=Homo sapiens GN=LUC7L3 PE=1 SV=6	0.794756	19.9555183733322	-2.38383556968626	0.0287528430581147	0.224929648271049	-3.63631444961003	9	9	-	-	+
[truncated: 4,237 more rows]

## Sheet: Table S2
Head	T.Co_1_1	T.Co_1_2	T.Co_1_3	T.Co_2_1	T.Co_2_2	T.Co_2_3	T.Co_3_1	T.Co_3_2	T.Co_3_3	T.Mo_1_1	T.Mo_1_2	T.Mo_1_3	T.Mo_2_1	T.Mo_2_2	T.Mo_2_3	T.Mo_3_1	T.Mo_3_2	T.Mo_3_3	mean_T.Co	mean_T.Mo	Nb canonical tryptic peptides	Gene name	proteins	logFC	AveExpr	t	P.Value	adj.P.Val	B	X..rep.T.Co	X..rep.T.Mo	cytoplasm	membrane	nucleus
[truncated: 4,858 more rows]
